# Supplementary material
Source: publisher figshare collection journal article supplement (https://gsajournals.figshare.com/ndownloader/files/26881136)
Supplement: Supplementary file 1 [file 26881136]

>Cuni_T000536-R1  Name:"Protein of unknown function" Cuni1:2610354-2614813(+)
GKAFVHGEVVDASDTPPEKKVYKCLSCGYLFGNLSDLKRHLKIRHHVHMQDIAGMEQMQI
SEVEVVQYEEEMPTVATSAMESQSLQSAGQTDSGELQLQMPNEEGSISMSAVNLIKQLIG
MSQGEGQVRVVSEDGQPVNIPQETIIVHQDGQLLLTSDPSGLLPGSQYVIQYYSPGDVVS
T
>Cuni_T000493-R1  Name:"Similar to Tjp1 Tight junction protein ZO-1 (Rattus norvegicus)" Cuni1:195144-238996(+)
YPMHPEDRYYPSYYADHATSSYQASRAHIDPYATLTPSERLRSNTQPGSFQGGFDEMGPY
RQRGEAGDRPSGEANHKTHTAFSNNQGPAGYGLGVEHKGYADNSSHSSDSYSKYMNSPQN
KHDDTKLREKFGNLQTAGREKSPGNDPYRFTRSTAHPVTGNVDRAKISDLSAKYRKQDIQ
PKSGAGRQAAPLSNQQSVAKKELPPPVPVKTFSLKQRGIEPDELKVRNYENSNRPYEYVS
LRQAQSSTTFGGGGGSNRTDYPPQPLQPSFHHNQNSHRSSAYNNASSSSSKPYQQTLDHQ
SKTQQFQQEGRGHSLDSTFPRPAHYPPDSADPDYQHSKAFSNEVYMDQQDLQRARQAKMQ
TSLSGYTSMPEQTDDEQQLEMQRARHRAKSESRLAETSGVQQHWNNTNSSISLFNGYTDN
TSNLQRTSRVASSTIMLAGTHSQSGRSRANASRYKSWDASRTDANFSLAHSHVPANSAAS
SGSAFTSYKKPIKQASFSGTTNSPNTFQPSSSFKKGKFIVKPKSSTDRSHSVGNAESIDE
KHTIVATAKGIFTSKGGLLESPETGVSILVPEGAIEENQEQEIYFKVCRDNSLLPPLDTE
KGETLLSPLVMCGPHGTRFLKPVELRLPHCASANPESWSFALKSSESPSGQTTEWQNMTL
AGSEGVAKGRVDQTSVSILVDHF
>Cuni_T000492-R1  Name:"Similar to TJP1 Tight junction protein ZO-1 (Homo sapiens)" Cuni1:111057-189742(+)
MAGKSGIARQLERVRPKFDQELDINKVFPRLLRRGIFSVSEEKRILEPTVPQRRIDVLLD
IISKKDRNVFVEFCKTLEECDPHLLTVIVLDTLQENEEENPPTQALQLGFEIALKERDAV
LRENAKAQEERDQVIRQLEQVKNERDLALLSLENIAGKHGHSQDKHLVSSSQTLPRIKNM
KDMSPAAEAGQAFEETNPNVVWETHNVRLQKAPTFGFGIAVSGGRDSPHFANGDPSVAIS
DVLKAGPAEGKLQINDRIVSVNGIPLDNVDHNTAITVLRDCGNIVNLVVRRRVLLPSSPV
ERSSPPFRINLSKTNKKDDFGIVLGCKLFIKEIVQQSLASQESALKKGQIVLKINNTPVE
NLSLAEAKKLIDKTRDKLQLVVQEEGGYTSSSFASPAAVANDVVWDKSDVNIYRAGTRLE
EELYVRDPTSGVQHAVPPGAYPNSENTRYDGHYVLDNDLPTVSTLPRSFETNVLHQQEDM
KSFPPVSHDGYYSDQGGTWPGPGELPLWQRSGDYVDEAFPRRIINDLDPRSVSFPKDKQT
GLGLRLAGGNATGIFIASVQPGSAGEREGLVEGDQIILANEKEITGMTREEAVHFLTSLE
GQVTLVVQYRKEEYDRIMASHEAGDSFYIRTHFNHTATDINEHSFKIGDVFHVKDTLFRG
IGGAWLALSVSEDFIEQKKGTIPNSKTAEVLRQQQKEDGDKENFPNRGRGSLFKRKSTSR
RVKSLGKDHWDEVIFAGLSTRFPAYERVVYRDPGFVRPVVIFGAIADIARERLLAEYPDK
FYFPQMDKSTDHGEKKDKTTIIRLSSIQEAITHRKHCLLDVTPHSVDRLNYAQYNPIVIF
LRAESKQAVKDVRGRWKTAAKSVRKLLEQSEKIEKEYPHLFTGQLKHMGTDAWFPKLCEM
IDSQQRQQIWMSEKQ
>Cuni_T000526-R1  Name:"Similar to ntf2 Nuclear transport factor 2 (Xenopus laevis)" Cuni1:2338623-2344165(-)
MNPNFDSIGKQFVEQYYLVFDNKDIRGQVAVMYHPTDSLLTFEGQQFQGVEAIAEKMKTI
PLDNMFRQITTVDCQPTTDGGVLINVIGQLKNNSENDKPLGFSQTFVLKPANNSFFIFHD
IFRLVIHNM
>Cuni_T000510-R1  Name:"Similar to Npr3 Atrial natriuretic peptide receptor 3 (Mus musculus)" Cuni1:1405273-1414520(+)
MSRRRRSSDVISSVPLSTLATGVQHLPSSASDQVQERYFRLVSRLVIPPTGGRASGKNVS
VTVGVLLPFSGNRSFDVRKVAPAIETAVEKVTLDMGPWNFHSVTVLYGDSQCDIADSMNQ
AIQLHERQRTSAFFGPVCDYAIAPVARQARYWNTPLITAGATAFDYYWLKNTTYSTLTRI
GPANLQGCSGE
>Cuni_T000496-R1  Name:"Similar to VPS13C Vacuolar protein sorting-associated protein 13C (Homo sapiens)" Cuni1:450231-517946(-)
MVFESIVVELVNRYLGTFVDNLDASQLSIGLWGGDVVLNQLSLKESALDNLDLPVKIKAG
HLAKLTLKIPWKSLYTEPVVAQIDGIYALAVPNIGIRYNEEKEKKAAQEEKQAKLAAFEE
QKKLEAEKDKPKDPKKDSFVEKLATQVIKNLQVKVSNIHIRYEDKYTNPDRPYSVGVTLQ
ELVFQTTDANWKETVIKEAVTQIYKLIRLDSLSVYWNSKTDLLHDQEGKAIVKELASNIL
SAQAALSENIPNQGHKTNLQYLFKPISAVAHLRLNTKPELTDFNIPKIFLTLVFDEIAVA
LSKDQFDDVLEMLESMERMALLAKYKKTRPDVPVKGNAKKWWHHAYAVTLEHTVRRRRNM
WNWNNIKRHRNNLKQYRELYTQKLDSKKLGNKEQELLKNLENELDVFSICICRNQAEVDV
ARLGKKREAEKSQNGGWLGGWFGGGKKKQKEGKQGNADAEKGGLDLTNKFQEEFNDEEKL
KLYKAIGYDENAKDTTFPVEFVAVRLVTKLNKLSLALVDRKNAVDSQLLKLSLTEICASF
GQRPAANAIRLDVKVERLRSAGFPRKDYTPKIISSIGVSKEENASLLTLSVETNPLDGLC
DSRIRVQSRPLEIVYDA
>Cuni_T000509-R1  Name:"Similar to Collagen alpha-2(IV) chain (Ascaris suum)" Cuni1:1298599-1318487(+)
MRRRQGRRGMRRRQGRRGMRRRQGRRGMRRRQGRRGMRRRQGRRGMRRRQGKRGMRRRQG
RRGMRRRQGRRGMRRRQGRRGMRRKHGRGGMRRKHGRGGMRRKHGRGGMRRRQGRREMRR
RQGRRRMRRRQGRRGMRRRQGRRGMRRRQGRRGMRRRQGRRGMRRRQGRRGIRRRQGKRR
MKRRQGRRRMRRRQGRRGMKKRQGRRGMRRRQGRRRMKRRQGRRRMRRRQGRRRMRRRQG
RRGMRRRQGRRGMRRRQGRRGMRRRQGRRGMRRRQGRRGMRRKHGRGGMRRRQGRRGMRR
RQGKRRMKRRQGRRRMRRRQGRRGMRRRHLISADFTMTHIRSDRSEDLIRRSAKKNNNM
>Cuni_T000505-R1  Name:"Protein of unknown function" Cuni1:1081226-1081934(+)
NACLPYRPDQVNTWFREAVTRLPSAEPEGVPLRAYVDMINLVKTSDFRTMLAAVAKLRTI
RLEDGEELYFHATDAQSAKSILESGIDLTKTRSREDFSNGYGFYVTTEYAEAMKWATRKG
AKFCHNTGAVIAFKVSRLLQKEKDHLFLEVNTAQGRRKWEKTVSHFRNGEAFDALSVLLQ
NVKFIRGPVSKNAFLRPGETPVPYDFTQICLCDQEYATRYGSLRNICFVIFFKVD
>Cuni_T000535-R1  Name:"Protein of unknown function" Cuni1:2597991-2598204(+)
DKPFACASCSFRGTTKDQLKKHSEREHDKVAFRCKECDFLAPTRTRLWNHQLKHLGINGL
SCPKCPHKFD
>Cuni_T000514-R1  Name:"Similar to Npr1 Atrial natriuretic peptide receptor 1 (Mus musculus)" Cuni1:1710281-1740293(+)
GMAYLHSTDIKSHGHLKSSNCVVDSRFVVKITDFGLHYFREKEEELEEDTYAIERSRLWT
APELLRMNSPVAGGTQKGDVYSFAIICQEIVYRYGVFYLQNLDLSPQEIIDKVKKGMKPY
FRPTLEEFDCPNDELARVIRHCWSEDPAERPDFQQLRTMIKKLNKDGDKGDILDNLLSRM
EQYANNLEALVEERTSDYLQEKKRAEELLYNMLPKYVASQLIRGESISAEWYEGVTIYFS
DICGFTSLSAESTPMQVVDLLNDLYTCFDSIVEHFDVYKVETIGDAYMVVSGLPVRNGNL
HAREIARMSLALLDAVFKFKIRHRPGDQLKLRIGIHSGPVCAGVVGLKMPRYCLFGDTVN
TSSRMESNGLPLRIHVSPYTKELLDQFGTFHLEMRGAVEMKGKGSVVTYWLLGEENSPYN
IRQQGCNEPTQKSPQKTNNKQSSPSKH
>Cuni_T000512-R1  Name:"Similar to Npr1 Atrial natriuretic peptide receptor 1 (Mus musculus)" Cuni1:1638375-1659641(+)
MPEILNRISQTSIASYYQTNAETTVWLAFKLFRQTWIFSFVYLLFLLRGATALDTFHGID
SISSRTEVKIGVILTQIAGKANFTDLVFAMELTLPAIKIAVEKIESNYYPVLPGVRFVIH
EADSNCSGTDGPLAAIDMYWAKEADVYFGPGCTFAIAPVARYSGEWGIPVVTAGALYDNF
KNKTAFKTLTRVQSGLDNTTSTDLSKAFECIFDKFHWWNIGFFSEDNPSDCYHTLYSIFL
MVKKRYKKDLYHRYLRDNDIKVFEGHLKEAQKMVRSKYAIVYPMIFILLCL
>Cuni_T000511-R1  Name:"Similar to Npr3 Atrial natriuretic peptide receptor 3 (Rattus norvegicus)" Cuni1:1522134-1523021(+)
MKINRITRWILPVISIILQTSISTSTVALPKMSDFGMSDEDVCAFPIEESPEVNATEKHT
VKIAVIVPYNSSFQFSAQGIVPSICQAKKYLASKKIMSSFQLQFYFGDSKCSDKEGPILA
FEFYRQVGVNCFMGPVCDYSLAPVSRYAPYWGIPVISPGGLSHSFGESKLVDYASLTRVG
ATFDSLTLGLIAFMKQFGWRKVNVIYNSQAKGHQISGFCFLMASAMIHMSKRAMFTGKFV
IFMEGRDKPENVLINEIGTEISGKSYDAFFVFFHLRLHVMYHNVQGRGSGGGGRW
>Cuni_T000525-R1  Name:"Similar to NXPE1 NXPE family member 1 (Oryctolagus cuniculus)" Cuni1:2275892-2300045(+)
ISPFINKQNWRKTSIYDIFEKHKSKASEGCNNFCNLTSDMGCEATKIEDWQKCMLSPNFK
FMPLLADFEYIYPFEVDYLSYPPMTDSRQLPNVSLSKVYMDGAANGEISCAINDTLRGRV
DLVDDFGKHRTIGGDEVRVWMVDKQTQTYKAAGHVTDLRNGSYQISVRCLWPGKSQLNVA
VAYPREYLRVVIQHIHKGIGWYYAVKFRRQNIEEVTVCSATPNIPGRSCVCNLTSVNQQS
LYCGRPVDSRLTCEDWVETFSLPIPPPHNVTPAENNLIKTIPRPISERTISHNITIVAKS
TGQLPKLKPCSETSPASTWDTEYQPQGYWTSNNWQSLICERPKMTAAWTISCLKNSSVWV
FGDSNGVRLVGVTSALTQAEKRTETWPEQFIKTDQQNGIHFIFTPLEYPVYLGQAWRRRL
PYGGVAKQIDQIPSNGTHLLMIHYYLHITPSHLNIAYLRLTAVRDAIQRLLARNPNVVVG
IRGPHVSSVELNFNHAVGGDNLGRYLLAMTRHVFVDLMHKVILLDGWEMTVALENSWYHP
VNTVPAELVRTLLAFKCS
>Cuni_T000494-R1  Name:"Similar to Trpa1 Transient receptor potential cation channel subfamily A member 1 (Mus musculus)" Cuni1:250701-251657(-)
MLPCMEMPDTVKHCLNTGSSKYINLHDGFGMTPAMLAARSHGDRAECLKLLLNAGADVNA
KDIHGMTLLSLAAGRGQAGCVQVLLDAAGTQHVNCLDIAGQTPLMLAARSLGDNVECLEL
LLNAGAKIDTFDMYGSTALLYAAESGNARCMQALLYAGASKHVNTSNHQDETAIMLAARA
KHNNVECVKLLLDAGADIHTLDKFGSTVLAFAAQSGNVDCLQQLLDAGAYKSINCCNLQG
ETLLMLASRSLGDNVRCVERLLSLGLSVHGQDSEGRTALSLAALEGNSQCVVALLAAGSD
QYVNLPDFSWFDTVDVGS
>Cuni_T000506-R1  Name:"Protein of unknown function" Cuni1:1095168-1099136(+)
MAISTHSMLRFPYGSGLTNTLFEQEIERPGSVEPGFLPVRSKVKMINLSGSALLNIPSIA
MFQLQPNTGYNETVYYHSTTSAFAVNILNSGIDLTKSRTRKDFSYGNGFYVTKDIDKAVD
WAHRKARGGTGAIIAFKISIDMEREEPHLSLEAGTARGMELWRKVVYFFRKGIYDPEVVS
LVQNKKFITGPVATVNTTPYNFNQTCIHDADYAKRFGRLQNILFVIFI
>Cuni_T000490-R1  Name:"Protein of unknown function" Cuni1:782-14303(+)
SQWLKTNGYLDTTQPLPVSLELQSNNRYVQFNFYEFDTQDAATIPDLSLCFNENNTWNLQ
LNISASYDQINNVSSNSFRRAFFAAIVAQTSLESIVRISRLNVQPLTVSQTLVQFKLFDT
SSLPLTGDVANANPGVPNLQIFCDLNNIINSGAFSIDVPVTTDSNTVGVISYKAKPNSLA
IFGRDVTACAASQTGYSAGAMAGIAFGMLFLGIILSVGAIFAFYKFRNPGSAPNVDKKRI
DEESTA
>Cuni_T000541-R1  Name:"Similar to Prrt1 Proline-rich transmembrane protein 1 (Rattus norvegicus)" Cuni1:2810206-2827568(-)
MDQKSIKNASPEYNYSSQPGPAPYYYDNQGHPQYYPPNQGSAPYYQVIHMVVTQPATNVT
QVVSVQDNMGLAIFACLCCFWPLGIVAILRASESRDAMNRGDLNGARVSASDARKFSLIS
ICIGVVLILIAIIVPIIVVTTSASYTYSRTTYYG
>Cuni_T000519-R1  Name:"Similar to TBC1D20 TBC1 domain family member 20 (Bos taurus)" Cuni1:2067827-2075472(-)
MERTSLLLNFIYPLVNKCNPELCAHMQKNDLGTIFALSWVITWFSHVLGDIKRILRVFDF
FLASHRMMPVYLSAAFVLYREQDIYAAGDEMGYIHKCLSTIPPDLPLESLLQRAGDLYLQ
YPPTEISQDPMLIRMNRQVHEHFNRIDSRSAARRAAQQSQDRGRLFVKATLWTVTAVVGV
AAAVLYHSYMGQNWTFSDIWSSYT
>Cuni_T000501-R1  Name:"Similar to Ras-related protein Rab-11B (Diplobatis ommata)" Cuni1:737107-745806(-)
MTSSGVDDHYDYIWKIVLVGDSGVGKTNLLSRFTKNEFLSESKSTIGVEFATRHVTIKGK
VIRAQIWDTAGQERYRAITAVYYRGAVGALVVYDMTKHQTFDNLSKWLQELKDHADRSAR
IMIVGNKSDLRHLRAVTQEEGRVFAEKQQFSFIETSALDSTNVGEAFNNLLVDIYRSQVE
DASVVPPPSTETVHLPQGESHATTTQDSCSC
>Cuni_T000520-R1  Name:"Similar to Tbc1d20 TBC1 domain family member 20 (Mus musculus)" Cuni1:2075480-2084230(-)
MTEQLKCESGADVGQDLTLLCEETQVASVSEQFQDSDSETAHSESSDVEESNGFQKVKLT
IVSKGSKEKLKIALIRAALESDPVDVASLRKLAISPGGLVNKNMRQRVWPLLINANTTNI
TPKPSQEEMESMTKTYSQVVMDVNRSSSRFPPGIDDHVRMSMKDKLVDLIMRVMLKHQQL
RYYQRIS
>Cuni_T000516-R1  Name:"Similar to CHMP5 Charged multivesicular body protein 5 (Pongo abelii)" Cuni1:1804699-1818964(-)
MNRMFGRGKAKEPPPNLNDCISSIDSRGESIDKKIDRLEGELKKYKDQMKKMREGPAKNQ
VKQKALRVLKQKRMYENQRDQLGQQSFNLEQQNYAIQSLKDTKTTVDAMKIGVKDFKKAY
KHVNIDQIENMQDDLEDLMEQGSEIQEVMSRSYGMPELDDDDLEAELDALGDELLDEDSS
YLDDAVTAPSAPTSDPGTESKDGVLVDEFGLPQIPQSAK
>Cuni_T000491-R1  Name:"Protein of unknown function" Cuni1:63187-67720(-)
MNGWVGDNGYSCGMIDGCSIDGANFTGTVDDFLRYYRVPMHMFTHAALFMKYSQAFQALT
IFMHELLAMKNVWFVTPSQVIAWMRDARTNSEMIAAGWSC
>Cuni_T000529-R1  Name:"Similar to CTCF Transcriptional repressor CTCF (Gallus gallus)" Cuni1:2392963-2420638(-)
MDQVSIKMEDFMDVVYRCKFCPYSCTQSPDMGVHVRDIHLSSGSLSQQGSPSLMKASDSS
LALALDVAVSEAVGKIAAAAATGTSVSSSTISSLVDPGPGRSNTNFHHLHESEEVLGFTS
DAHAFLDKVSFTPMSIPSTQTGPMTLSNTSTPDLTELINLVKPSENNCGSSSSIRQSSSN
SLFTNASGHLSGIDSCHFVTTSSGHLPVNDSHLSSGESQLGMASVVQLQQPGGAAPLSSS
VTQPFTSATVVSGDLDGLGVSQPYTVMAIHLPHLAVSGSNTLPHYVVSTPVSEPISIPEH
TETKEFLLCGLCKLAFTTMEECQSHMQSEHKELMQCSGVSIGVQAGGAKRGRKRKADQVK
FKEIVLDTEDMEWLPSVTDNNRTPHPDGRMRRKVKPPRALKEDFVLGKRLKRRIRESGLN
LGYKIACPMMSCKAKFKTEMGLHTHMSCHNLDDTAFTCKECQAPHEFWKQLRMHLWRDHR
IDCDLFSCDQCDYKTDTHHKMNIHKEIHTDSKPYTCDVCGKGFRQASQMKNHQVTHVVQE
GKEARKGWFSSKTCDICDRAFANSKCLKNHKAAVHSTYKPYECMYCSHTTARKAMMELHI
RTHTGEKPFKCDICSYSTGDHNSMRRHKMRHTGQKQYRCTQCPYTCIQSISLKQHMRHKH
PGTTAGIFQCSRCPFRTINQEIYSNHVQDHKKGLIPDKVVPQRLELPKAKRIPRRLQAGS
AKRHAAGQSVVETLLMKHPQFHAVLPGEEPTILSSITGDPLSRGIEAEVFNMQVTMLPDG
DTQISADDMNRLSESPCLLATGVSPLQLIYSTLSTISEQGEAVRVGEGKSALLTAELIGG
IHTAILSSMQDGVTVHSVTYHIPKIGAGLNSEDDSDKVPNVGLTKGDDELMNIQARNTEN
INNSVDNNAQKLDAVESGMGPVVLQDSGIGEAEDKKSENIFYSEVSVKSDNPIDIVNKDS
CISLDSPSKMDCINRSEKLLESSVLREMLECKDKVSFLNTQDGMVNFITVDFLDSSIVSA
TTPDVSLGITRHGESESV
>Cuni_T000530-R1  Name:"Similar to Scarb2 Lysosome membrane protein 2 (Rattus norvegicus)" Cuni1:2437201-2462000(+)
ELYEIWQDIPVPVYMQFYFFHVHNVQEVKAGHKPSVTQRGPYTYRERRVKYNIVWNSNGT
VTYRQNRTFYFVPEMSVGKETDLITTINPLMATLAQGFQWFPSSIKSVISMVLALMTDES
MFTTRPIVELLWGYEDPTLLKIKSFLPFFITSSNIGYFIGRNYTDDGLYTVSTGETDLGE
LGKVQLFNGRKDVNIWTTPWARMVNGTDGSLGPPFAFDKKINYAFVSDLCRSIKGVYTGD
TSVKNIPLRRFGGDPNDMLNASANPDNIGFCVPPTKCLPSGLLNGTLCQKPVNGFKVPLI
FSFPHFLNSDPQVISSVYGMQPSQVEHETILDIEPWTGLVLQVAKRLQVNMFVAKVNGFI
QTANIRPVFFPIFWLNESSVTDDKRADMLKSQLFTPLLLVKIVEFGLLGTGGLMVLVGAV
LLFRRYLKRKVVETRIMPDRENSGRLVVDVDNAGAQNVYPYMYRDTEDCTMIV
>Cuni_T000502-R1  Name:"Similar to Hr3 Probable nuclear hormone receptor HR3 (Drosophila melanogaster)" Cuni1:787805-815652(-)
MSRYMRRAQIEVIPCKVCGDKSSGVHYGVITCEGCKGFFRRSQSGPVNYQCPRNKNCVID
RVNRNRCQYCRLQRCMALGMSRDAVKFGRMSKKQREKVEDEANMVKASRLNGLNQAQFTT
YQTNGYNFQPQQQQQQQQQIQQQQQPQQESQFLTESQLYSPNSSIQPVPHPVSLLRAVEF
NPINLGKAITEAHLRTCLYSNEQIEIFKRQILPQEQVEIYKNLTHRQLWVEIADKITLAV
QQIIEFAKMIPGFMELSQDDQIMLLKAGSFELALMQLCRVFDAESNRVIFGNMFLPLEAF
ATLTDEEFHLMSAIFDFVKNIQRLNITESEMAMLSALILISSDRPGVKEVGEIQQLHDRI
LTALKLEMGINHAGDEHILKRFVEQAGILRSLSARHIRVLNAFKEEAPEIEFPALHKELF
SIETETILPNLH
>Cuni_T000542-R1  Name:"Protein of unknown function" Cuni1:2844005-2875518(-)
METSDSNPVSVNPESAPVITTQAQAQPAALTTVVIVQRAPEEVENHLALAVCTCIFCFFP
LGIPAIVLTIKTQPHSQQAALKTPTVGVARPAPVKVENYLGLSICICILFCCPCSIPAIV
LTVKSIKALNRGDVVTAYSYSRMARWLNLAAVAAGLVSEVVLILLFTSYSDSSSEG
>Cuni_T000504-R1  Name:"Protein of unknown function" Cuni1:995758-1022387(+)
CLAASGIVKLLTMNLGHTAYLDNIHSKNVYYVLKASMSTLHNIARCAGVLHHFKEMKTAE
VILALRNSSDDFLKSMAMLTLVYLVEEKDNAKLVGETNIIKKIINLLRKALEDKQKGKFH
GLTPIELIQGLARLAVYDLNKAKIIEDGALDGFVLMLQSHDPREQTLCAECIWLLSFDKR
VRQTVTDFPEFMNTMENLKDCENQVLRRNIRGALWLIKGEIDTDTSDIRLQNIPKSKKQV
FISFSLNERDQVKQLSSSLTAEGYKLWVDWDQTGGSTLQAMVEAAASSAVVLICMSERYM
QSSACRTEAEFIFHQRKDIILLLMQKQYLPDGWLHVLVGSKTYIDFSGKYLYEKSVQVVR
YCHTSSTTSSSSLPLSNNGNAFLTSMSNEHVENWLESKGLHRLTSAFSQIDGQLIWQLKR
LRETTPEYFYSILERQFGMTLIDILRFNAALDTLQ
>Cuni_T000532-R1  Name:"Similar to Bcar1 Breast cancer anti-estrogen resistance protein 1 (Mus musculus)" Cuni1:2541351-2544170(+)
DMMTPCNYNSNGLQDYDVPPPDRDFINIRSSSRRPSYDPFRNSAGSRKASLVGELYDTPP
NSKRTSEETSEGIYDTPPSSKRASSERTPPQSNRSSASRDSGSNLLSTNPTGQLNGTTLC
NHHPTIVRQKNGPNPSENCYETPPGSNRSSLERLLSVENSPIYESLSPAVSAEHLDAAQH
VYDVPPSRNHVHSLSNPNSQASLCSAVSNESLLSNTSCLSSNRISQNTSLPDSACSSMDL
PSDIYDVPPSAQEGDRSRKQLSVDSGLGFYDSPQKSRPSSATSNTESLNVSKSSSDYKPF
SFAKDIKRSKSLENTIDDLYDTPKNNGPKFIWKKAEDTTGKSSSKESSEVSSEPPEVARD
SVISVTSDSSDDNTVLSSSLDTEQQLTDILLWDVLLLDPNSAVEMLAKKQQEISKATTKL
SSYVNSTWRSRSSLEKTLYEIKVSCTLVKSSLQDFVGFCHGALANAVRLPDYHLASRLQK
YVSPLQSTLELVNKSYLKLEDIKWQVSLLSEPLDKSKPDDLSQIALVATDLMSDVKKTAL
FIQSNNQILFSRIAKGEVRSSSVSSKPPVGLKVGNSGGNSSSSASGQYKNIQHRPLPAVP
GGVTCIPPNSVQPTQEKPKLPLSEIKKTLNMDDYVECDDLSFKTETEAAHNASVGHTVKE
HDYVHLDPADLCTSDSSNNELAWDGNNTCEQNEQDMFRNNHININIGQQNLKTDISEICN
YDVNILPVNNNAFQYKLDIKYSQPEKAFPVLTNEETTLNSDTISDLERSEQDLKTPVNLN
TSSDDAKFILPPVSSANFTTEPEALDPNDRQVLAFYIDKMNSHSTLLANAVDAFIGVVSN
KEPPNVFISHSKFVMVSAHKLVHIGDSIHRNLINNSLSISIMQCANHLCDCLKASVTATK
IAALQYPSPLAVQEMVDGVVAVSHAAQQLKRVIIQAAKQ
>Cuni_T000534-R1  Name:"Similar to ZFAT Zinc finger protein ZFAT (Homo sapiens)" Cuni1:2575318-2584201(+)
MENLPIFRSDYDKTEFEACIDVDLSQVDHMFRIHIIEQELNELSGMVYNTPTMSSLSVYS
CNVCEKVFKSLSHIRLHCVTHTDLKPFKCNKCTYSTNSKGNLYTHMRKHTGQYYRCDQCD
FKTVNKSHLVEHHMTHDSRRSQCLLCQKDYSTLKSLINHIRKYHTDKKGKDYLQTFLQGR
GAKGTTVIHQCHVCNRKFKKRIDRDRHLFIHDIKDLPHVQQCELCDYWASRRVYLDKHYL
KHRVIYCCAVCNEK
>Cuni_T000540-R1  Name:"Similar to FBXO36 F-box only protein 36 (Homo sapiens)" Cuni1:2792311-2801985(-)
MPDNIISQRWHCPEGYLYFRQEVADPPSKDYFQLIVTSDKTVSFKVWNVTPPFKATARRG
PIAFQSTFEHFSTDVTIRDAIQSRLRGELEFLDNLLEGKFNYLDQLDTQLQLYIVSFLDV
CSTLRLSATSRHFHQLCEDNSIWKRHFLSSNLPYFVTPGLMDIVDKKGWKAFYIIVNRIA
QSTDEIGTRFLLQKAPPTCLGHRSSSQIASSSSSPKVQSKTTI
>Cuni_T000515-R1  Name:"Similar to PRP2 Repetitive proline-rich cell wall protein 2 (Medicago truncatula)" Cuni1:1800154-1804665(+)
MNENTTNTSLKLKFEQRINIMAHGVYKDSAESNGVYKDSADSIGVYNDSADSNGVYNDSA
DSNGVYNDSADNNGVYNDSADSNGVYKDSADSNGVYNDSADSNGVYNDSADSNGVYNDSA
DSNGVYNDSADSNGVYNDSADSNGVYNDSADSNSVYNDSADSNGVYNDSADSNGVYNDSA
DSNGVYNDSADSNGVYNDSADSNGVYNDSADSNGVYNDCADSNGVYNDSADSNGVYNDSA
DSNGVYNDSADSNGVYNDSADSNGVYNDSADSNGVYNDN
>Cuni_T000499-R1  Name:"Similar to MYCBPAP MYCBP-associated protein (Homo sapiens)" Cuni1:630390-695783(-)
MSSRSNVKTKDRTRKKREGTPEKSATPSQEQDEASTSSKDVIWNEEIEKLQIKSEELPKI
WPPRPPSTEKTFMRVLVQKTRNVTPVEKRKPLDSTVNKQAEHGSPRWQIDYSEYIGPQYT
ESGDVIPYSILGTYEDFYREATRRGVNMPRPQGDLENVGTPTVKYEKKRHKHPRDTESNS
IRNWYNKMMERKNQQGYISKLLQKAPENLAMNQSDNYRTIQEQRYLIDRTISKVDYGKGY
RIGSEFWFQQEQLGDDLKGLHMTLTQTQKGYPHPIEHVGLSKIVKKEKGCDWSGKENVYV
SYPWHKSEYLNQRLKQLQPFIDEIDSWKPDFDDLQVVGSNKPNITSVNADMDGGEVFSTR
PHSSNEDGEIRSEYKDVAESESDESEELLQKDSSVRERKDPVFGPSLLIDKQSARWTGDN
ESMKDKVAFETIINFETFSEDKVTSFLELINDGTTTIYYDWKKIIKENPFGVAPNMTPRF
YFNNSC
>Cuni_T000539-R1  Name:"Similar to MYLK Myosin light chain kinase, smooth muscle (Oryctolagus cuniculus)" Cuni1:2755925-2780556(+)
MNRKEKVKVDESEPSYQEDVPFERRDVVVKKDRWVTDLYAVDSLLGRGKFGEVKKCRERR
TGRQLAAKFIEVTGPQDRTDIINELEIMKHLQHPRLLQLYDAFENRDRFCLVLELVSGGE
LFERVINDDFILTEKACVMFMRQICDGVAFMHSENILHLDMKPENILCLTREGNRIKIID
FGLARKYNPKDDLRVLFGTPEFVAPEVVNFDPICPATDMWSVGVICYVLLSGLSPFMGET
EAETLSNVTMARWDFNAEEFENISAEAKDFISKLLVKDPRKRLSSSLCLDHQWLRRSTKR
ESRLPERSLSKKRLRKFVYRRKWQKAINAMLALRRMGVSLC
>Cuni_T000521-R1  Name:"Similar to NAPG Gamma-soluble NSF attachment protein (Bos taurus)" Cuni1:2089127-2105725(+)
MAATAVDKKLAESIASEHLRLADKCLKTSLFKWKPDHDGAAAEYLKAATVFRNAKAFDQA
KESYIKVGELLKAVNSPFQAAKAYEQAGLLCKENEEFDEAVHWMELAALMFQEHGTPDTA
ALCLEKAAKMVEEDKPEKAIHLYTKASEVAEIENRPIQSAECIGKAARLQVKCFKFEDAI
KSLCEEIRYWLEAENYVCINKVSMAVILLYLTGEEYVAADKFFRGCLNYPKFGTSEEAGA
LEELLRAYDDGDEETGQAVLDRPVFKSLDNVFAKLARDLTFPSGFCTSESAAATDCENLP
AEEDGEEKELDPMKRNIMEEDEGEEKVAAVRSNIVEENEGGEKVALLRSNIIEEDELPPE
LC
>Cuni_T000500-R1  Name:"Similar to DNAJA1 DnaJ homolog subfamily A member 1 (Homo sapiens)" Cuni1:707640-717645(+)
MVKETGYYDILEVKPTATDAELKKAYRKLALKYHPDKNPDAGDKFKQISMAYEVLSDPKK
REIYDKGGEEAIKGGAAGGGFDFHSPMDIFDLFFGGGGRRGGGGQRGPRKGKDVIHQLKV
SLEDLYNGATRKLAVHKNVICNKCEGRGGKEGAVQKCGNCRGTGMQVRIQQLGPGMVQQI
QSVCGECRGAGEVIDPKLRCKNCNGKKIVKERKILEVHIDKGMRDNQQIRFSGEGDQEPD
LEPGDIVIVLDEQDHERFRRRGNDLIMTMPLELVEALCGFQKTIQTLDGRTLVVTSMPGE
IIKHEDVKCIMGEGMPIYRDPFEKGRLIIQFLVNFPQTGALTPQAIDVLESILPPRQEVI
VPDGAEECQLQEYDPARDGADHRRGQGMEAYDSDDEHPGGQRVQCASH
>Cuni_T000522-R1  Name:"Similar to DPM1 Dolichol-phosphate mannosyltransferase subunit 1 (Homo sapiens)" Cuni1:2113505-2128624(-)
MAPTNKYSILLPTYNERNNLPLIVWLLVKYLGSEYEYEIIIIDDGSPDGTLDVAKELQRI
YGDDKIILRPREKKLGLGTAYIHGMKHATGNFIIILDADLSHQPKFIPDFIKKQAEKDYD
IVTGTRYVGSGGVYGWDFKRKLISRGANYVTQVLLRPGVTDLTGSFRLYRKLVLEKLINS
CVSKGYMFQVEMMVRARQFGFSVAEVPITFVDRLYGESKLGGSEIVGFLKGILYLFATT
>Cuni_T000524-R1  Name:"Similar to Nxpe2 NXPE family member 2 (Mus musculus)" Cuni1:2197597-2198372(-)
QLPKLKPCSETSIIYTWDIEPRPRGYWTPGNYWQSLVCERPNITADWTVSCLRNSTVWIF
GDSNGWALINTLSNLTEVENNSGSWPYQFIRRDKINGITFRFTPIEYPVYLGQVWRPRLP
YGGVAKQIDEISSNGTHFLVIHYYMHLAPSHLNIAYLRLTAVRDAIQRLLARNPNVVVGI
RGPHVSSFEFNFNHAVGGDNLGTYLLEMIRHVFVDLRHKVIFLDGWEKTIALANSWYHPD
EMVPLDLARTLLTFKCS
>Cuni_T000531-R1  Name:"Similar to BCAR1 Breast cancer anti-estrogen resistance protein 1 (Homo sapiens)" Cuni1:2500562-2500781(+)
FLAKALFDNVAEASDELAFRRGEVLTVLEQNTKGLEGWWLCSLRGKQGIAPGNRLKILSG
LSEGTMKEETLTK
>Cuni_T000495-R1  Name:"Similar to Vps13c Vacuolar protein sorting-associated protein 13C (Mus musculus)" Cuni1:298363-368594(-)
IRNHLKVPVEILYRSEGGIVSVGEVGSEVTFPVPLDAVYSTTGEIFFQPKSEDGRYGVSK
EGVAWKGVGENTKVKQISCEITNNKETPAYYFNVLPKFEKIYRENTDELADQMITFHLHP
TVIFHNLLPVNLQVTLEGTAETCILDAGHHVPLSYASVNQTTLEIVILEYRGQKWKGKKL
IRLDVPELSVLTFQVENGGQSTYMDLGLHCKEKDGSFDLTVYSPYWIVNLTDQDIALKED
DKESPLVQEKGSKDIMLFYFRDKTMIGGTAKKKVSLKIADAEWSDKFSLDTVGSSGNVTC
KNKAQGNSLEVGVKITLASSGLTKIVTFTPFYLLINASTVVLEVREADKPSTWTALEPGE
CKGFYPQTVAKEMTIVAKVQGYDPQTVPFFLNKVHTTLLKLEDSYGGLNAECQVSESAMI
TTFKTYRPGMATVLFVNHTTQCTVVIKQTGSTVEPLDLVPLDSQLYTWTDPTGPREVTWS
CGEKKNVKSALDQDKIEEFFAQNNIKVYFVSFLDGMQRVVMFTEDLALATVAQEAGELEQ
ADQEINLKIHDMGFSLINNEKLLELAYMGITSSGVIWEEKRKRFRALKIKDAVLLELAYQ
KYLLEVQTGKPKSAIISLENKMEVDFESMRMIKPNQFIIRRSFEDGIWVQLRKSPHSMQF
HAKINKLQFDNQLRQAIFPTILSPLPPPKSVAADSVPKPFVEISLMTRIHEHSELMQIKY
FKVLIQEMNLKIDQGILNELLAMFASDVQTLRAKEVAEFKEDVNLTKRELKEEAGVSMHA
KRVSFYDYFHISPIKIHLSFSLQGGSLSDTPQANILGVFLQSVGVVLTDVQDVVFKLGYF
ERQHSFYNNSQLTSEFIRHYSGQAIKQMYVLVLGLDVLGNPFGLLRGLSEGIEDLFYEPY
QGAIQGPEEFAEGLALGVRSLFGHAVGGAAGAVSRITGTLGKGLAALTLDDDYQKKRREQ
LNKRPATAREGFARGGKGLVMGVFDGVTGIVRKPVEGAKQEGVAGFFKGMGKGLVGVVTR
PTSGVVDFASSSLEGIRRITDFSEEIHRLRPPRRFNKDGVIRPYIREEAEGYNLLLETDK
GKYVDTDEYITHVKVKEDGKVVFIVTDKRIMLAKRGEIFGAWDTDWVFTYSELKGAPKQT
SKGIEILLKEKEKKKLFGSNVSKKDVPIADAKLVQDILTKIAEAMEADRIESQV
>Cuni_T000508-R1  Name:"Similar to Npr3 Atrial natriuretic peptide receptor 3 (Mus musculus)" Cuni1:1218217-1251953(+)
MRIYLSCECLLTLNAALLCMTPSSGSSFSADTPVQALSDFDKNTEIVKYEGRHNFAVSHR
RHKFHHFKDLSSSSLIDSSPFLGSLKEPNKMSSKTPVYILVLLPKSTNYLFSIERVSPAI
ALATDNVTSSQFLARHRLVTLYADSMCHIAEAMNEAITFYIKGKVHAFFGPVCDYSMAPV
ARQAKYWNLPVITSGAMARDFSASKKTLYSTLTRVGSSFNTLIEFLVTLFREYNYSKVNL
VYEPNGQGHILDKLCHVMTDGIHNAFT
>Cuni_T000538-R1  Name:"Similar to chmp1a Charged multivesicular body protein 1a (Danio rerio)" Cuni1:2663070-2676284(-)
FTTRQLEKLSKKAEKEQKAQQLKVKKALQQKNVEGAQIYAENAIRKKNEALNYLRFAARV
DAVSAKVQTGLAMKNITKDISGVCKALDKAMASMNLEKVEQVMAKFEKQFEDLDVRTSTL
ENSMGAATTLSTPQDQVEALIQQVAEENGLEVMDQLKDLHAPSSSIRTPAAGESSKEDDL
SRRLQALRN
>Cuni_T000528-R1  Name:"Similar to CG7506 Transmembrane protein 70 homolog, mitochondrial (Drosophila melanogaster)" Cuni1:2384103-2384852(+)
MSVSFKLISRGLIGPLFSRRLSGLAGVCSSVDITGVMGTARTTSQPNLHLSCLPQKLLNA
TERPNNHTIIRLYSSTSEDSSLGHLVYKGRVAKGLRALKIFSLSTSAIGLLAQPYLLITY
QNMPLVAALPIFATLNCFVFVNPLLIHFIAKKYVTELYFNPDTKVFTAYLLTFFARRQVI
TFTAADVAVPDVPNMFAMLTVRGRPLFVHEDDFTSIEVYKHLMGFDRPLKFLGEDAVNPS
YQHQDKTNT
>Cuni_T000513-R1  Name:"Similar to gcy-28 Receptor-type guanylate cyclase gcy-28 (Caenorhabditis elegans)" Cuni1:1678253-1678448(+)
HNATARPWFRQNDTEERNAKARKAYESLMTVTLRKPTSPEYRKFSEEVKARAAAMYKNFT
YGEQE
>Cuni_T000517-R1  Name:"Protein of unknown function" Cuni1:1965345-1980783(-)
LLSVFVVCLTPENIEELLSLHNRYRKAISSEQQAYNVSNMNSLEWSDRLSVQAAETATCR
SARPRQLELVRNTFGHVNVGRRRHGNGNLSQIVDMWFAERSRYLPEEGECFPWDGCTSYK
NMINAKHRKMGCATAEGCGRGLSYVVLMCLYEG
>Cuni_T000497-R1  Name:"Similar to mns1 Meiosis-specific nuclear structural protein 1 (Danio rerio)" Cuni1:522340-549678(+)
MAMARRTAQGQVAYQRQLEKNRQRDLLQQSLEEDRKLALYYDESIQREEKVQKRRFLRQQ
QIMSKEMEMNDSIVKGERDRIIKQQQMEQEENLARELQRVKLEQLRDEKMRQQIRETSLE
LRELEAKLRAAYLSKERAAQVAEREAMKFDEMKRESEISRHLKEQNERAEEAERLREMER
YKEMVRYHQELERQLEEQEAQKQQAYEEFLKEKIMIDEIVRKIYEEDQRELERQMKKRQA
TQKYIAEFQKAREEWKQQEKRKMEEENNRIMEFAKKMQEREDFLRAQKKEKDSAMGKLHE
TLATEISRKEAEREEMERIRMELVFEEQEERERQREMAEVEKQIRQKIELQMTHAQQMHV
KQLRLEAEKEEEEEFRKQMLAKFAEDDRIEQMNAQRRRMKQLEHQRAIEKLLEDRRVQFA
REREADVEARLEEAKLEEFRKKVIEEERQRLLKEHATKLLGYLPKGVIRDDRDLDILGPE
FRQAYTKRQIDPFDETAWLSK
>Cuni_T000503-R1  Name:"Similar to fzd8 Frizzled-8 (Xenopus laevis)" Cuni1:949624-959537(-)
MERVVGVDGWEFRSKKFFHFISDRKGPSLKELKRGGDSRVGCEEIYLPMCKGLVPYTHTK
LPNQFNHTTQVSHTHLERLWPYMDQSCSKNVRVLACATYLPKCHGKHPAQGPCKKTCMQA
KKKCAVTLKELMGLNWADKFECKGLPARNCVKPVKDTKCANEHTHCVENSVMPFCGNLTF
MWGTLPNMFGQCSIDELNSEMQQLNALVATNCHLHLKFLICGVYSPFCIRNEVPFTFPCR
ELCDEIRKACEPHYRRLYHGLPWPQKLQCHRYPNSESTDIECVMPNEGSTFLGG
>Cuni_T000507-R1  Name:"Protein of unknown function" Cuni1:1109920-1112836(+)
MALLTDSIFPYEYERTGRWYRREIERPEFMEPGLRLVRTKVKMINFYRDSDSDISDIATT
QAMVHTEPNEVVYYHGTTDTHATNILERGIDLKKSRARQDFSNGNGFYVTQDIDKAVEWA
KRKARGGTGAIIAFRISKDLEREEPHLSLEVHTARREQLWRKVVSYFRKGVYDSEVVSLV
QNQKFITGPVSDVRTTPYDFDQTCIRDADYAKRFGRLQNILFVIFIA
>Cuni_T000543-R1  Name:"Protein of unknown function" Cuni1:2888749-2891566(-)
KDELASYSNSADPPPAPVAYFTVQPQSQFQSEPIIVKNATVVIAQPSSATIVEVPDNLRL
ALFTCCFCYLPYGLAAVFMAIQ
>Cuni_T000523-R1  Name:"Similar to Eif2ak1 Eukaryotic translation initiation factor 2-alpha kinase 1 (Rattus norvegicus)" Cuni1:2136919-2169347(+)
MSSPLVKPHRVHRDTHIFTLSNGSRNTKMKESNVNQKISIKTLADFKLRAGVKPIRRMDV
SDAIEVKHDNAIKVPSYNQETQALAIAANKNLPPHLLLASLLEELCFIYVKDKNKAQHLF
KILCERLSKLQVMAPLSHVDEMSGLRYQRRTMLNKLIRAAMRSMEQGPSLLALPETHFSL
NVSSPGFMEEDIIEQQTSRYKNEFQELGILGKGGFGSVFKARNYLDGCEYAVKKVRFKHK
NTDLELKLLREVKALANLQHTNIVGYNAAWMEYDSPYLTGKVLSSERSPIKGQRTEDSDS
DTFDNQDSMSVEFCLSDDHIKSEVGRTFAISVPGGLAMNAKLFSTVHQQDFAPLAGTKNE
NQNRSSSEDSVVFVDSVQEHEVFQKLSKLDLKNVRVKKGTSRSPMKTKNKHEANYFPKDV
KNHKNRETLCCYDKGCNVSTETAKGASTKMFPRGSLRNAHNVDESLLDNSSAILHFHSVD
ESLLENLSTNPQFHNVDDSLRGDLSTDPKFHNLSDCFLDNSTTDPQFHNEDKSLPGSSST
NPKFHKVLVEHRHSNHNTTGLLTSSDVCRVHRQSDSVGCVADQEIACTSVDNQKSIRNTA
QVRYHWCPDFAKFSDQKCQCSGVQLPPDFINICQQAVSSVVIDLKEDCHLHQHQEYTSVA
KLDLNSYMPADCQHCVLSTASQTQSLQLNSTLSELLISETGKSHDSEQALSTPFQAAGSS
VTLKASVSHSQCKNKVAKVNPDQTAFTKKQLRHSPILLHASSQSQQMNTVPETTHGPNIF
MSHTSSIVEPVSEISNTPTRAEKSGNGLAGLRRGPMMRVSFRSDSEEVVESHSNYVFHNS
VTLYIQMELCTFTLQEWMAERNSEFHLKGC
>Cuni_T000527-R1  Name:"Similar to PIGU Phosphatidylinositol glycan anchor biosynthesis class U protein (Homo sapiens)" Cuni1:2346715-2371327(+)
MAKAAEYLIGFFSIILRIGLMQTNLPKWLQSRNEVVTPLTSWERVEEGLALQDQHISPYS
GDLFHETPLALRGLKIANYCPWGVSGFFLLIDIITMVFLRKVAVTFREHLLDDQNVNKET
YSPKAESLLLTPKQLSWLPSVILAVHALNPFSIMTTLALSTGAITNLAILLAFYYLIAGN
RLLCTLFISLATYQAFYPVVFLVPAGLQFYKNKRPQSSTKSYVSREAVTSYFETCSLCFV
FLGLLLGASFLAEGSWEFLQSTYGFILSVPDLTPNTGVFWYFFTEMFDHFRTFFVCVFQL
NAVVYTVPLAVKFTEKPVFLMYILLVLTAIFKSYPSYADAALYFSLLPLWKHTFSYLRNT
LVVAGMFITCMVLAPILYHLWIFAGSANANFYFAITLTYSTAQIFLVTDILFAYLRREYD
LYHGTEHKNADGTKAQIVLE
>Cuni_T000498-R1  Name:"Similar to Nmes1 Normal mucosa of esophagus-specific gene 1 protein (Rattus norvegicus)" Cuni1:587486-605115(+)
FLSRKINYIMSAGARSFGFGLKAFKRFPELVPLVSILSAACLGGTGFIVYSLATKPDVRV
IKSKGPAYEDVNPTENRKLVQVNKDHYQPIPELEELRKEIGHYKP
>Cuni_T000518-R1  Name:"Similar to FBXO15 F-box only protein 15 (Macaca fascicularis)" Cuni1:2031877-2058925(+)
LPDEILSLIFWNLNAGDLISISQVCHRWHRVSLDNLLWKKLYTKFVGASTKEKEDKVSLH
ELAPGCWKNLCLRRCKAKRDQIYFKKWTLADPYTGLKQRADQTLSKLGVCFELSLINTEG
QENTFPHCDICWSTMSVGVQWYALVVPDIKDIHCIRVRACTPLMFYGPSKPAKDGILQKS
KLLEYTGRIRDVLQKQTPLGSEPQIQLFELAPGLLIAKYQADGEIAFVTCTLHYHNLVSR
CLLGNPNRIWSSPSLSCLNDDIDPEYGLHGYTCIIIVRNMRTKFLECRFTELHTSIEALA
DGFAVFNPVKKDDKLSHVSLSKEINFSWRTTLFKGVLKDVGILDLTLLDQNGEPFWIVST
GISVERCTQTNQFDFNPSTYKLIQYSDNVGKLRLEIGKLDDRRQYLSDASLSLSLNVINK
AFKRNYQTRA
>Cuni_T000533-R1  Name:"Protein of unknown function" Cuni1:2568239-2568541(+)
MRCQFSIMRCQSSIISCHFSIMRCQFSIMRCQFTILGCQFSILGCPFSILGRQFGILGCQ
FSIMRYQFSIMRCQFSIVRCHFSILGCQFSILACQFSILG
>Cuni_T000537-R1  Name:"Similar to VhaAC39-1 V-type proton ATPase subunit d 1 (Drosophila melanogaster)" Cuni1:2633986-2649334(+)
MLPELTFNIDHGYLEGLLRGFKSGILKQADYLNLIQCETLDDLKLHLQSTDYGNFLANEP
SPLTVSVIDDKLREKLVVEVEHMRIHALQPLAGFLDYIKYSYMIDNVILLITGTLHGRPI
HELLPKCHPLGTFDQLAAINLANTSIMLYNAVLVDTPLAPYIKDCISAEDLDEMNVEIIR
NTLYKSYLEDFYNFCKKLGGATADVMCEALAFDADRRSFIITINSFGTELSKEDRIKLYP
RCGNLYPSGLKLLGECDDYDQVRAVAEYYPQYKELFDNSGSNPGDKTLEDKFFEYEVHLM
KKAFMQQFQFGVFYAYVRLKEQEIRNIIWIAECVAQRHRAKIDSYIPIF
>Cuni_T001117-R1  Name:"Similar to Eloc Elongin-C (Rattus norvegicus)" Cuni10:483160-483519(+)
MSDNIDEDKKRDEKVYGGIEDGHEFIVKRDHALTSGTIKAMLSGPVPYTNSSTEIPEFPI
APEIALELLMAANFDC
>Cuni_T001111-R1  Name:"Protein of unknown function" Cuni10:206934-266787(+)
MRWCRIRFVLLGLLLCVVHVVSGTCGQNFVDPSSSALLADVVIEGKVRSSSDPDPDGTFN
ITVAVKKNVLKGKELINKGRVAKTITVDRFKDGAKDKRLCLGHVQTGRTYVFFLKDTQDK
KGLYFRIMAMPVKKSKKVIAEVKAVLCDSCAKLPSISALNVPKKQAVDRNITLECRVDSN
PPALFSWFKDGVIIAKNSDKYQVRNG
>Cuni_T001109-R1  Name:"Similar to S1PR1 Sphingosine 1-phosphate receptor 1 (Bos taurus)" Cuni10:73605-74642(-)
MLGTTNSPADNHTGHADHHHHDGDNDHGFIAVFFLLAALFICCGNAATLVAILRNHKLRT
IPNIYIGSLAVADFMVGVMLLVQGISELQIVQKILDHQEQFCLARMSMLFVCLAASMLSY
LLVACDRYVYIMQSLKYVNIVTKQRSLMFIVVAWMLACVYGTVPAYTSHFTPKEGCSPTH
VFSDTYMIIVHPTFFLTLSAGTCWLYFRIVAVAIQQQKRIREQEFGVNQDLGGVRLSQRT
WKVVKILMLVFGLFFLCWLPLLVLAFVEYTVHVDHLALDIASLIAVMNSGVNFLVLAAMK
KDFRAEFRGMMCTCCGEVCCCCGSVKVHPAGVSTVGTSQWGSSAE
>Cuni_T001143-R1  Name:"Similar to Nup85 Nuclear pore complex protein Nup85 (Mus musculus)" Cuni10:1360563-1410054(+)
MATTSERESEIFCLPVLQQRHVGLSCVWGLGKQLHVYQTQTPPRIVAEKKHITDIPKVDN
QEIFDVQWNAEMHDVSRKLVNETHNIFVMLQGQVKSLSDTTLYKQLRKASKQYRAVLKAC
SLELMQIADLCEDEAHKLKYEQYIQEFEMVQLIWSLCEIIFIDIHPGGLILTPLLDWLRW
HFQEGKQKAMEVSQAEQPCSHAHYWESIYRLLLQGSVDNVRKLLALHIHSSSDPFTSVDE
LLSKMPQWTYQRAQSVAEYEMKWRHWREECIRRYEAGEFAAYTQLETIVQILCGDDAVFR
EMKDHCETWYHLLVSKLFYQNPTVRLTDLTFDIKPCQAVYSLPSENFPELDNILQAALEF
DIHQVIKESCSFLSSRSWWFVSHLADVLHHCGQLDPQKLPFGSNLREYLLLEYATALMSH
KSLWQVGVDYLDFCPVFGRAYLESYIEHIPLDSEGKAHKILHLCQERDFTAQAQSICKVM
GMRCLQQERLGSALSWFLKSKDAIVIKQVTDRFLTEYCEQGKFSHLDLIDHLGPSMLITN
SLTFLGKYREFHSLYNSGDISAASSLLLSLISSRLAPKTFWMTMLMDVLPLLELSQVVLD
VQKTYEVMYCLEELQRDSTDNYKNLADSELDKLQCLRKALAKNLSRAIIEEGSVKLVS
>Cuni_T001136-R1  Name:"Similar to MINPP1 Multiple inositol polyphosphate phosphatase 1 (Homo sapiens)" Cuni10:1093593-1100489(+)
MAAGLKLRVVATLLFFLIYVDLFSFSVSSTTPPYKYFSTKTLYEWAHPAPKPVEDELYYL
KGVKGKTCRAKYVSALNRHGARNPSLKEVTGISDLHRRLVAAMGPNTNRELRSWVNRFPN
NNDQALTPLGETEQRGLGQRTGTKLRSLFAGKDNTDSGLKFLVTSHNRTKDSAVAFYEGL
SSIVYGGEHNGSGVNAEVNNQLLRFYDDCDRYVTSVKDNKTAPKEYDDFLSSNRVLRIKE
KIERKLNISSEVLTSDDVQRVNTFCGYDVAFFGWSPWCSLLDRCDMKIMEYGEDLEHYYE
TSYGHEINWQQSCQLVSAIFAALDNNTVDGDTLDK
>Cuni_T001140-R1  Name:"Protein of unknown function" Cuni10:1254948-1261219(+)
MEAVTVNHFSISDLTTEEQQLLWSIQERKKQLILEIQELKRDIEDVTHELEGLDLVED
>Cuni_T001133-R1  Name:"Similar to larp7 La-related protein 7 (Danio rerio)" Cuni10:999438-1026209(-)
MAEEEKLHMENQAITGEEEVVLEQEQAEPLKLSSKKHKRKTSPSVEDDIATKMARKDPHT
KTQDETSETDRSTRQTDSSKSSLSHSVTTLKRSSSDLDKSLESPCKRLKTEADRLRPAEG
KKKNPRRRTKHLIQAVIDQMEFYFGDSNLSKDRYLRQVIDSSPDGYVDLAVFGNFNKLQS
LHKDGVSLKVLATAISKSKLLELSSNGCQVRRITPIKEIDQEETDSKTVYVEHLPAHATH
MWIRSIFSQCGKVVYISLPVYRTTRMIKGFAFVEFETPEEAAKACQLLNNPLPVKPDDKP
GKFPKGNKTLNRLQKLAPVKMEQDSNEENISDDQRTDAIHSKAATSNKKKKNTTKKKKPT
DLTLNESNLKVTRTDLEPTEEDKKNEHREGKKKKKKKKKKHSQLVDGVVSTDSKLTQDPT
QGATADTDVSGREGESTAGGSTRDVQTAAVNESLMESREGDDSYEVDKSADVKGAEEAGS
KKKKKKKRKGDKKLKDKNKDMAEDNSLHAKAMDTLEKCDKDVSVNHSDYTDAKLSRKERK
RLRQEDIRRKKLEREKSDTDHTTAVATHSEVHDLNAACSSGDLPAGEVEAGTGEVEAGTG
EVEAGTGEVEAGTGEVEAGTGEVEAATGEVEAATGEVEAAAMDVETSGRDVKAAAREQDG
MLTSSVLDNNKGNRRRRNDGTELTSILKSKKGQERKKVEFDPVTVTTEFIRAREVRKRKK
QKKEKLHLRVMAKKEWLTLKADYIAQQKSHMAALKESLRELRMQENQGQPPGNKRVDLED
VFGTKRLKPSQDLKMAHVESLKFTPNVIVQWKCSHEMPRDKIRTMFKELSGDSIAYIDAK
EEAKFGYIRFKDEASAEEFAKLSRRSTSFMARILPADQQEEYWKKANEDRVKKLGRKKHE
KGADKIARKVFERNKATFFQKPSHVVFNDDDDDDNAKDNKEEDREISNNSQSKPEEPVVS
EEGQKPTHTDS
>Cuni_T001108-R1  Name:"Similar to ACSL6 Long-chain-fatty-acid--CoA ligase 6 (Homo sapiens)" Cuni10:20084-66483(+)
MTAQTDSDLLRKLQQLVSDNPIAVTAAAVAGIAAASFMISAGGSTKPLQLPFDLNDQSVV
IDGQPEHRASRFSKGPDYYDRDLPAAEVNTVYGALLRGLRQSKNNPCLGARTGPKKEFEW
MSYQQVVDKVLQFGSGLVHQGVAPSNEVKVGIYAANRPEWTIADYGCQAYSMCPVPLYDT
LGLQAIKYIIDQCKISTVICDAEAKVKTLISLCPELPSLKLLVVVDKVAQALEDEAKGAG
LDLIQFEELLKNGQNNLREPLLPKPDDIFSICYTSGTTGNPKGVVLTHYAFVSMVQSIML
GVQTNFVPTCDDVYLSYLPLAHNFDRAVHVMMLLAGGRIGYFSRDIKLLTDDLATLRPTL
FVTVPRLLNRIYDAVHTEVKHSIIKSAILRWALASKQKDVNRRIYRRDSIWDKILFNKIQ
NKLGGRVRIVITGSAPLLPDVMNFLRCSLGCVVLEGYGQTESGAGASLTIPGDPSLGHVG
PPLPGCHIKLVDVPDMNYYAKDNFGEICIKSDYIMKEYYLEPEKTAEALDSDGWLHTGDI
GTWLQMGTLKIVDRKKNIFKLAQGEYVATEKIENVYQNSPFVGQIFVDGDSLKTCLMAVV
VPDVLYLEKWAPKNGFPSDLADFCGRQDAKGIVLKDMFAQGKKAGLQSFEQVKDIYLESN
PFTVDNDLLTPTLKNKRPALRNLYKQKIAQLYTSNGL
>Cuni_T001126-R1  Name:"Similar to UTR7 UDP-galactose/UDP-glucose transporter 7 (Arabidopsis thaliana)" Cuni10:722799-727667(-)
MENKQVVLEIDTQEVRSAQTAIKGVLAAFFYGTCSLSSAFVTKILMDTMKFDFPIFIMVI
QMLFTVCTLELLSIFEFIDLPAYTIKRGLSFLAPAVFYGMNSVLALTALSHMNIAMYGVL
KRCVPLFTMLFSLVILKKDLPNRFTIASVTLLTVGCVVAGYGDLGFNLTAYVCGIGSNFT
QALYLLLVQRYSEHHLPVTHILQLNSFNTLPLLLLAAVVNGEMTTLATYPHWDQLSFYLL
FASAVSVGMLLNYSLFLCTSLTSALTTSVVGGLKALVQTLVGLFTFGGVSHNLATYTGIS
MNVVGGIAYIWARYQDNRSRPGRLTSLKKVMSFSFLNSADQGKEPNGHIHSDQDTAKHRH
GSSGCENIRL
>Cuni_T001130-R1  Name:"Similar to metrnl Meteorin-like protein (Xenopus laevis)" Cuni10:926127-951832(-)
MRPRPSATADWAKTLLLLVMAIIVVHISGQHVCDHCNCQISSLGERQAIYSLSLVCYTGT
ITWFDASGAVRIELMPLLLGSFRACFLVHSDNTQVKVSHETPHVSPAQNYRLKSHGTRTL
QLNHVLTATSKGNEFCVHSGSNGPLLLYVEAVRGPDLQGVPKIVLHYDLEKLDTHMEVDP
MEECRPCTREELLDSYCSMDFVVVGIMAHVANSEVREHSNITVHVKQLIHQRQSHFFQRI
QRSDSHLTGHVTVPRKCGMRKSEGDLILTGRYRLESLTLRCASYLHDWRKIQHEVECSHN

>Cuni_T001118-R1  Name:"Similar to SYT17 Synaptotagmin-17 (Pongo abelii)" Cuni10:495051-515156(+)
MRPIEFWTANRENVQPRSKRRVPSESEIHVENFQKELYHVLPEEQSSLTDEEKLAQFQLG
QLHFGLRYDLESKVLVVKIIEARDLPSPVCMDDTKQDMAHSNPYCKVSLLPDQKASKQTT
VQRKTQEPVWNEYFTFDIDYQECQERTLEILLKDFDKFSRHRLIGRVLLQLCSVNSVKGG
HMWKPLLPGSKECRDLGEMLLSINYLPSAGRLNVDVIKAKGLLQTDLVGGSDPFVRVTLV
LLERPVKTKKTSCKHNTIDPVFNESVSFNLTHEQVQWPEFYLYLYTYSKDDFVGRVVIGY
HGTGAEESQHWRRMLQSERSPVAQWHTLKSRDDCDQVSVASIAVP
>Cuni_T001122-R1  Name:"Protein of unknown function" Cuni10:611699-621204(+)
MQSQATNTDRELRQPRDHRRGADDGYWMQKIWESPVVAGFLIIVQDVYIYLVSTDLLWQS
VSQVKRNLAQSPCSTLLYMFLVLFGFLPFLCFFLFVCGTFILWLVCFIFCQAVAVVFAGA
LFGGMFFFIIVACCLMATALGLTVHMLSFLGQVYRVLAFNAPEAVAFLRQQLARLGIHLR
LPEDDQT
>Cuni_T001114-R1  Name:"Similar to LITAF Lipopolysaccharide-induced tumor necrosis factor-alpha factor homolog (Gallus gallus)" Cuni10:387280-396174(-)
MSKEIPVENPPPYSGHPTTGPHFLPQNVVHPTQPTTAGQPSGYAYPVQPGYGQGYGVQSA
SYNNTTTIVTQPTIAVIQVYRESPVRTMCPHCQADVVTATHYETGTFTWLACVIICFFGF
KNFVAFCIGCCLFPFCINGCKDVVHTCPNCRQQIARYNRM
>Cuni_T001146-R1  Name:"Similar to nog2 Noggin-2 (Danio rerio)" Cuni10:1512944-1513663(+)
MQLASLLLVLAVRLCSCGMLDSHASKFYFQLLQSTGKDYLPERHGSNGQRQPVPSDHLPL
VNLVEDDDDARDPRPSDINVTQLRQQLGSEFDREFMSLEAPRRRVDKLHLQFLNGKPKGR
RPPFLRLLRSARLQDGSRLTLNLPRNERRRLQKFVWNLTFCPVRYSWKFLGRRVWPQWIK
EGSCFSTRSCSIPPGMTCQQRAQTYKTFLRWHCENFERRQHCRWIEFLYPIITECSCSC
>Cuni_T001110-R1  Name:"Similar to cystm1 Cysteine-rich and transmembrane domain-containing protein 1 (Xenopus tropicalis)" Cuni10:139749-143741(+)
MSSPYPGNQPNAPPPPYDSAYPPAPPAGYYGGPPPQGYGPTHPGYPPPPQNYGGYGQPQA
PYGAQPYPQQHGFGHPGPYQQQPPAQQVVYVEERRRSHDNTGEMCCLAALCSTLLCCCLW
D
>Cuni_T001138-R1  Name:"Similar to Wdr13 WD repeat-containing protein 13 (Mus musculus)" Cuni10:1172446-1203209(+)
TLYIRRRSQLLREHAKNEKDGTSRKEYLRLRAQLLNARYGSPAFSDQGSIKSRSFSLRSI
GRNTESLESMLVGANDSRKFYHHRRHMSASSLKYLYEGPMKYVYDSIEVVPTSVAEASRA
MAGGKSLSENYAFTGMHHIFDQHSAEVTRVKFANDDKSRVACSSLDGTLSICQVIPPPAT
VICMLRGHSAGVTDFVWSLSNDVILSVSLDGTARLWDVAAGTCMRVIIDSLGSELLCCVF
QPLNNNMFVTGSSRSQVQVMNMSTGKGYKGGSSKVTGRVNALTFDSSGRILWAGDERGSV
YSFTVDVATGKLTKTRRMTVSEGHPITSLSARAWISREARDPCLLVNCCINSLCLFRIVS
EDGALQLKKSFPIKQRTSLIKSTFCPLMSFRQGACVISGSEDMCVYFFDVTKETKSCVNK
LLGHSAPVIDVCFNCDESLLASCDANGMVIIWKREGKQGTL
>Cuni_T001127-R1  Name:"Similar to KAT6B Histone acetyltransferase KAT6B (Homo sapiens)" Cuni10:742750-787745(-)
MVKESHKTVEANSTYLEWILEAVHKIKHQKQRPNKDRIVNAIRQNHQVSEDSIVEQLEFA
VKSGQLLRVESNNDFTYKDPSVGSQSKSKTLELDRKTDLTKIILQCLRESKDARGLMLKA
IEKYIIAKFVIKSSDDEALSKNLRVCIRRAVQRGRLIQSGKFIQLPEKKEVNGGSSIDLE
EANFEVVLPFERNRKTATPMVLCSFCLEGPDKNREGKWEDLISCADCGNSGHPTCLKFSD
VLTARVRRLRWQCINCKKCSFCGKSGKEDDMLFCDFCDRGFHMACCDPPIAKPPKGDWKC
NLCDPERGSQKGKEFLEAALKFTEKVKTQIQATTRDRVKKAKLYQATKQKAINIRATTIG
NKRKRKSTESSGGEDNDADSSQDVLSPSELPVLSGASSLETLSILPETKNLVDGLSRFFT
PTNKRLSRVSLSAIQPPLINLSSNKVIAEANNKNTRKAKPADSVSVKSRSKTSQSQSQQA
ATRLIKRSKLMHASRGRQKTQGPPLIGQLRGLFDGLSTFFNATGERKRTLPVYNPSRQKK
HSPQHLSDSAASYSLSPSDHCSWDSPAHSFCDKTRAGLSVCISDNNSNSRCGPVSALSSA
RHDLSWWDDMKHLMQMTLEEFHHYGAHPTDARNRCWTARGPRRTWFSRERGHGRGGSGRV
FRDTVRTKAGMVLPSYVTEEDIALFKEAQEKTQKDLDKTQGQPAPEPRSHPLPSQQQLDI
SDSLDTTPVTELPRYPPCIELGQYEIVTWYSSPYPQEYASLPKLYICEYCLKYMKSRNGL
QRHYEKCDLRHPPADEIYRCGELSVFEVDGQTSKLYCQNLCLLAKLFLDHKTLYYDVEPF
LFYVLTINDEYGSHIVGYFSKEKHCQQKYNVSCIMTMPQYMRKGYGRLLIDFSYLLTRRE
ECAGSPEKPLSALGAVSYHAYWRSVILEQLSAVSSDKSVSIQSISERTGMCPLDILQALK
DVHFLRHYKDRSVIAIDMELIKSHMDKLKGKSRLSLDEDCLHWSPMISKSFLSDEEEEAE
RQLSEMREVVESIVTERKEISKEIKNSPLKDDARIASLCSPSTPEEDQTDKWPRRYGRKR
FPSMTWGNPGVKRLRRGEAASEADSKCPFEFEVEEDIKMLPPTQPLKPLRIDRSPVRAPV
SSSPLSPISPSPFRPSNDSPVKTPEKRLSKKSAPVTQDTDETTPLLRGRQSRKMRRPLGR
PPKKSSPDESASPPPRTEKKKKPTRKAGRVVTKDIDMDQPARKPGRPFKRKPGRPPKKAS
DEAPESSSKLSGHRTIKSNTKVPGRRPGRPRKDASNVDDKESDSSDEESDQREADKLSTS
SCDKSKEVEETKTPAAEVDNDFLPSQQTTTTSPAPKKNTVIEEYIDSSSSSDTSGSSNTD
SSDSDDDEEDDDDDNDGDNDDSEAEEPVKQKYLTDGSKSAMGTTETSEMTTKVGRLSASS
SDDDSDAIPRKSNVTNNMRQSDDSQLRKSDEDSGDDQASRLVGVHNNSKLSSDSDSDSED
NASVRSAVRKDKDAAVNRKDEGKVETAGEERGEEDEETKAASQNLADIVKDLEEADVEKK
PDSPGSDVEAQPSVHSEAADSSSFDSIDSLTDAFSDAATPTDPQIPSSPPPAPAPVIVNS
DDDMPSPSGSMGRGPTPPLPHLIQEPDLHLGRSSVDPMLSSPLSNQQLQQVQSLQQKPLT
SPGSRTTIPVNIPSPILISPSPEYRHHPHTPQQMPTPSSVKDSSHEDIYQNVGSVQGAPL
PSPAQLTSPAQLTSPAQHHSPAHLTSPSQLTSPARLTSPAHLSSPAQMASSMLSQQEKHH
PGLDTSPGMQPQKGHASGALSLSTSRASKPPASRSQQRSRSQAGQARVPGYHGQPSGGPP
PLSSIQPLQQQAFDLNITQLGLGSPASLGSGEMTLDGAQHVSLNSLNYDCAQNMQNMLYC
NNGQGRNSFMDTVNMGGHQAMLAHSEGSAGGYQINPSVVTSSLSYHHHGSPISTYSPTML
PPQSQSQQQHQRQQQQQQRQQSQQQNSQQQTLQQQQQQQQQQQNSPRLLQTSSALPMTLH
QVMVQGASIYQTSGQQPNNCDLIKLQQLTNRIQDLPVDTLQMTPPQNMTPPPINMTTTPA
VMMRSMTTPPITGPIPHIALMGQPTAATYKRQRSSSSTSRKTPSVPPVSPNVTVTPNMSL
SPNVTIQPGGSMLPRYINYRMPQGVINPGYITANPHGFLQPQQIPMQMQMMNMNVHSAGS
AQAAFQQQVQQAGQPGNPPTVYAPYYINMNNVMRR
>Cuni_T001142-R1  Name:"Similar to Sh2d4b SH2 domain-containing protein 4B (Mus musculus)" Cuni10:1307518-1342111(+)
MAQKLADAEAEAVRLKEEAALMRRIEEEKQRVVKEKAEREAEMKRQQEEAELYKSIKEAR
LAFQRMELEKKNDEEKNKRRLSEIEEEEKQARRRSRDVANSIRDKRSSEIFTNLQKKRHD
LEKQALEGQKEVETSWQEQEKKAKEAEIKMRETARQARTEYRESLRRSMNLMQAVDAFAG
TPLAEGSKAPIPPKRHKKVTSLQGGAKKIPRPAKPENRQMIVDWFVKEEKDRVRVLDPAT
RSIVPWFHGIITRADSEKLLLDKPKGTFLVRVSERVWGYTLSYRSVNRCKHFLVDASDSG
YQFIGADQTVHESLAHLVKFHKDNPVTISGQEKLLYPCGQTSTVPDFSDLFKKV
>Cuni_T001132-R1  Name:"Similar to B3GALT5 Beta-1,3-galactosyltransferase 5 (Fragment) (Pan troglodytes)" Cuni10:985331-995992(+)
MARYKNMCTYLRRTLCLRRVLISSALTLSSCALVLFWSQSYRGFGLWSDTRNQGQTTADY
FTAAELLSQQEQQLSSEDELIRVVDKLDQQEHQLSSQNELIRTVDKLDQQQEHQLTSQDK
LIRVVGKLDQQEHQLSSQDELIRAVDKLDQQQEHQLSSQDELIRAVDKLDQQQEHQLSSQ
DKLIRAVDKLPFRTMTPSLLLLEDLYFNPSLQQLVEYNNPVLHQPQINCSQSTLLILVPS
HPRSVAERRAIRETWGSVARGRHWPGKGDNFGVILVFVLGVAEAQEFQPENIQRAKSVLR
QDVDALRSNTDSYFTESTDRTFFDRTSNTSSILMKKDSIINLVYEKAGDANKETLDNMAY
VLGMKTVHNNRLRHSLKMWRNHFITEQSSQAKKPTMEGGINALLLRSDKSIHKTSTTPHM
PTTPYSHNDANLLEEIFSFGDILQFDMIDTYANLTRKMIISLQLLLKTCSGVKFILKVDP
DIFVNVPLLATFLGRHGDKNSVYGRIYPNSAVERTGKWAVAKSALPISRYPIYAAGNAYV
MSADAAEKIVGLASRFPYILVEDAFITGILASVGRINRVNVAGFTKWTEPKPDACDFVTD
KIYVGNNFTEYDHRLYWREIIDRGGYRCDV
>Cuni_T001137-R1  Name:"Similar to Rac1 Ras-related C3 botulinum toxin substrate 1 (Rattus norvegicus)" Cuni10:1160139-1165453(-)
MQAIKCVVVGDGAVGKTCLLISYTTNAFPGEYIPTVFDNYSANVMVDGKPINLGLWDTAG
QEDYDRLRPLSYPQTDVFLICFSLISPTSFENVRAKWFPEVSHHCPNTPIILVGTKLDLR
EDKETIEKLREKKLSPITYPQGLAMAKEIGAVKYLECSALTQKGLKNVFDEAIRAVLCPK
PKPKKKPKCLIL
>Cuni_T001120-R1  Name:"Protein of unknown function" Cuni10:546885-561456(-)
FNSGVMGAMILLGNVSGAIAGTSFTHIGVLSMYAIMIAILVVCVLVTTFSISETQGKPDL
IPQPLSCRLIFIGFWAPLKEHDFRWVFITRFLMQQGVATITGFLEYWLNDMIPLPYCWSA
ATSVALLLLPLLFAASLSSVVFGIISDKTGYRK
>Cuni_T001123-R1  Name:"Protein of unknown function" Cuni10:630311-640517(-)
MSKNPYPLAMFVSLLMSQVRIGGGHGRLWEPPARGTMWRRGFKTPANYDDNGLNCGGFNH
QVSLGYKCGLCGDAYDGVRENETGGKFATGIISKTYTQGQSAVFQVDLTANHKGFFEFKI
CPTGDPRVKETQSCFDKNPVSIAASHGSGTKYYIDDQSRMMDVKVQLPPHLSCEHCVLQW
RYHA
>Cuni_T001107-R1  Name:"Similar to RPSA 40S ribosomal protein SA (Taeniopygia guttata)" Cuni10:6001-12535(+)
MSGGLEVLSVKEEDMLKLLAAGAHLGSTNVDHQMHQYVFKRKPDGIFIINLKKTWEKLLL
AARAIVAIENPADICVISARPYGQRAVLKFASSTGSTPIAGRFTPGTFTNQIQAAFREPR
LLVVTDPRIDHQPVTEASYVNIPVVAFCNTDSPLQHVDIAIPCNNKGAQSIGLMWWLLSR
EVLRLRGTISRDHPWEIMPDLFFYRDPEEVEKEEKEALERAKDEIPAPQPDWPGEPSIVG
APDVSDWAAEDVPVPAVVLQPQVFPPVADEWNVPKIGDWTATQEVAPDTVANWSNPDENW
N
>Cuni_T001116-R1  Name:"Similar to Arhgdia Rho GDP-dissociation inhibitor 1 (Rattus norvegicus)" Cuni10:452752-458032(+)
MAEHEETAPEADEEEEETLGYKPPAPKALEEIVKQDAEDESLAKYKEALLGGGLSGNVII
DETNPNKVIVQKLSLLAEGRDEVFIDLTKPKEDIKKESFTMKEGCKYQIKIYFYVQRDIV
VGLRYEQKVSRKGVQVSKMTQMMGSYGPKPELQSFTTATEEAPSGMLYRGNYNIKSRFAD
DDQNKYVAWEWNLAVKKDWD
>Cuni_T001128-R1  Name:"Similar to DGKE Diacylglycerol kinase epsilon (Homo sapiens)" Cuni10:810758-835908(+)
MDDLSLSLAIMLTLLGVIATVMTMYRKYRLRHYSIPVRDPTKGHRFFMVDMFTTTTYCNV
EETRLIHGARCDTCGICVDDSQMKEANKRIPCKAVSSKDTVMKHHWVRGNLPNYSECMIC
SQDCGMEFSLSDLRCAWCKNTVHDSCAAKTDTCDLGKYQQFIVPPTCLEVKWVGVKGTRQ
RHLIIKNVRHLKVGLWTPLIVIANRKSGSNDGELLLRNFRGYLNSAQVIDIQDISPENAL
EWCNLLPDVTFQLLVCGGDGTIGWVLTAIERLQLQNPPHICILPLGTGNDLSRVLGWGEG
YTGDVEVEKILNDIKKAKPVKLDRWSVDIKHEKHFGLARPSKTYIMNNYLSVGVDALVTL
NFHRQRESWPALFAHRLINKICYLSYGTKDVLERECKHLHKKIKVILDGKEIVLPEIEGV
VVLNIASWGGGCQPWGSGVSEEGYTDPRYDDGVLEVMGLFSSFHIAQLQVGLASPLRLGQ
AKEVTIILHGGNAPIQVDGEPWEQHPAVISITHRGQAAMMALKDS
>Cuni_T001129-R1  Name:"Protein of unknown function" Cuni10:838670-839163(+)
MGTCGETDQEHGDILPTDQEHGDILQTDQEYRDMWQTDQEHGDILQTDQEYRDMWQTDQE
HGDILQTDQEYGDMWQTDLEHGDMWQTDQEHGDMWETYQEHGDMWETDQEHGDIFQTDQD
HGDILPTDQEHGDILQTDQEHGDMWQTDQEHGDILQTDQEHGDI
>Cuni_T001112-R1  Name:"Similar to vn Protein vein (Drosophila melanogaster)" Cuni10:280113-298114(+)
RQSTLVIRNSVINDTGEYECVARNLLGEVRQSKPLTVTYPHKVPCERHTYCLNGGSCFHI
PALEVDICECRADYEGARCEKRQP
>Cuni_T001145-R1  Name:"Similar to TNRC6C Trinucleotide repeat-containing gene 6C protein (Homo sapiens)" Cuni10:1458181-1481615(+)
MQQQVMKRNMSSEFGWGSGADGGLGQQSSTSGSGAWTSTPNLENTSSPSTSWQVMGKSDS
ASDAGDDASSVKSGSTITNVTNNTPQSQDSTNTSNTGALQTSSSPWSTSNSTLPSMDSSP
WGNSSSSAVSSIGSVGWASNPPGLSLAGNNTGHNQQPGSNIIGSNSAFNSSSNSTSSSLW
PSNLSGSTSNQPPNMGGSLSAQWPSSSMLGNIGDLSKGSDSAWNHPASSVIDNKDLSGAS
SDPRMWGMSSDKASEGQWDTSKSQWGNNALAASADHSSSGTELSFAQATLKGLKIPPTPT
TPQSLVSSRQEDILRAIESHEGWGSRPVRQDTSWDVDNSPKSQRKFSTDGNAAASNVWNN
SNGTAIWEALRGNHSNNWSGAASSGGNSWNVDKDQTSWGGPPKPAQDPNTWNMGANADPK
TFATWGATGGAGDASNKMWGQKTEVGSWGEGGVQRPPGVSSWGDDGDGGGWEDQHRMAAG
VGGMQMMVPPSPALGGPAGMPAIVPQGIPGMNTAVVNSEPGAWNDGQKPGWNSASSAAVS
RSNLDEPWNKPPPTRTGWGDPAQDGADIDNGTGIWVAATPKQLPPQAKVASWGEASQQGQ
WNAAVGAKAKAPGGWDEASWAIAQRAKQLPSQQVPQKYMSSGSHPPTQMRAKLLQQLMDL
GYRKEEAQNALITNNLNLEMAINDLKSGNVNMARKDLDMDVFQTNISQSRMPYISKGGLG
SEELSDMRPDQVPTYNNLQNTPFPNAQIPNQPFMASNASLPASGLNASNSSINSSLQQKL
MQKMQQQQAPPSFGQRGAPVPPVGTATNNPLPPQQQQQIRSQLRQAVSSGLISQQLLNYQ
LPHNILVLLQQLLQLQTALQNVVGKQQQLMQQARSTGSRSNPQLEQMPGIISSINQQIIS
VQKQLQQAQSTFFSSQKPPSLSQTSGTITPQSNQQPGVAMMDTLDALSTDLANVALQSQS
RLTTQWKPSMDASAAATADTTTTNSAVTAANKVDDGGDSKAPGAKGLLQSSSSPNLSLIP
GGLGMTGDKTWSSNMSSTTSSNWPMSSSQNIASNSQTDVKVCNSSSTSTSLLSGLHSGLS
DVIPEFVPGKPWQGLAKNVEDDPHVTPGSIQYQRSLSVNRVHDDSLHNLDGHKLPNSSWG
ANLKSDNSLGLSQLGTRPPPSMSSTMTKGVGQHWQPAAANFNRHTCWPHSANSAFTKVTG
SGWNENTGAISSWLLLKNLTVDPNTVRALCAQHGTLLSFYTVAQGQLALVQYNSREIAFG
AQQHLNNFQMGTSIITAEFIAETDAQRFTAQIPPPQPTAFPPMNTSPWSQAPPATPFQNA
GMRGGDPWSSNSMLSQPSSKFASAGENLWGLWDRSDHNFNPLSNILGGESM
>Cuni_T001115-R1  Name:"Similar to LITAF Lipopolysaccharide-induced tumor necrosis factor-alpha factor homolog (Gallus gallus)" Cuni10:422905-429646(+)
MASGPPPPYPGTEDTKGSQPYGYGAPQPPEPGYPQPQANYPTQPGYPPPQAGYPQQAGYP
QQAGYPQQAGYPHQAGYPQQAGYPQPQGYAQAGHQNTTVVVTQPPVMLVRTFGSVPVRTS
CPHCKADVITATHFESGTFSWVVCVVLCLVGCDLGCCLIPFCVESCQDVVHTCPNCHQHI
ARWNRM
>Cuni_T001135-R1  Name:"Similar to MINPP1 Multiple inositol polyphosphate phosphatase 1 (Gallus gallus)" Cuni10:1073209-1081316(+)
MAAAMKLHSAMLFYILVYMDLFSFTISTLPNKYFSTKTPYAWTHPVPKPVEDELYYLKDI
KGKACSAVHASAVIRHGARYPGLDDVQEISAVHDKLVLAMEPNINPELYNWVNRFPSNNN
KALSSLGESEQEALGRRIATKLSTLFSDEDTSNFRFLVSSQERTKQSAAAFYEGFSSTIY
GGEEAEDDFDSEVNDQLLRFFSLCAKYVFSVESNKTAFKEYFDFLSNERVVRIKEKIDKK
LDIGPDVLTTANIRLIYLVCGYETAVYDSSPWCSLLDESDMEILEYLGDLKHYYKNGYGY
NITWQQSCPLVSEIFATMDETIMDIENADDGEEPGGLLVGQFAFGHAETLGPLYSALGLF
NDTLPLRADNYHQQSQRLFRTSNILPFSGNILFVLYECVPDEFGEDEEIEEADYYLRMFV
NEEPALIPGCEELYCPYNVVRDYYHDFVDQCHFKKLCQRSEVKDEL
>Cuni_T001124-R1  Name:"Similar to Scd1 Acyl-CoA desaturase 1 (Rattus norvegicus)" Cuni10:662557-668339(+)
MAPRNAGEVNNYEGDRLGLDQVETMINDTPSQKRPPMKIVWRNVVLFVLLHTGALYSVIL
IPRAAWATLVWSMFMYWLAAMGITAGAHRLWSHRSYKARPPLRAFLAFCNCISFQNSVFE
WSRDHRAHHKYSETDADPHNAKRGFFFAHIGWLLVKKHPDVKDKGKSLDLSDLTNDPIVV
FQDRHYLKLVLLCCIIMPTVVPVYAWGESCFVAFYIAVILRYTLVLNATWLVNSAAHMWG
SRPYDERINPAENYGVALCATGEGFHNYHHVFPHDYATSEYGWHFNLTTLFIDTMHFLGQ
AYDRRKIPMDVILKRKMRTGDGSRR
>Cuni_T001139-R1  Name:"Similar to LMTK3 Serine/threonine-protein kinase LMTK3 (Homo sapiens)" Cuni10:1223139-1250321(-)
MIVAVVLSIAFPVCFVALLIGCLDCLFKKRRLEGFRSRDATDGRHTNAFSVDICDVPSTS
EQVTIEPLPDILSKVSVAPALRPQITFVDRGEHASTAPLISVQRSFPRDHLTYLNEIGSG
WFGKAIESEAIQIVGGSLKSHVVVKMLKDDASKLEQKQFLDEVHAYRCLDHANLMSLLGQ
CTETAPFLVILEFAAYGSLKSFLVEHSQDQETLVAKNRYISFALDAAAGLACLHRHDYIH
NDLAARNCLVMSDYTLKIGDYGISDNLFKNEYYNTGTELLPVRWMAPETLVKSNGVWTTQ
PHNKMSDMWSFGILLWEICAVGERPYDMLTDEAVLQGVVQDKLLLPSDVDMKLPFKDRLW
SVMTQCWRDASHRLDVVQAYDSLKQLIRVRVDTVDAVSDFDQKWNQLKQNQERAPGNDTD
LGSRIALAGSFATDDSSSPPDKPSLLDSDGGAYESIQSDDFIIDVGDADEMHAPVYQSPA
TVLANSVKATEIPVQAIIHRRISDSSEDQIFVENEFTNTSVLQSQMAPIQSVDQTAGTYE
RHISPILPDAKMKDINIVKNDLSLEVKEHFSNVLTSEAQEEDNANASCSNFESRLLTDDE
DFSDFVRTSPTAPSLDFTDFASADISAHDVHVDRDQQFENEASSDVPGSDIETRKHADMP
VGAAAKNISLDHDLDAFSDFVTSDPPHKFGTMEILTENLDTAPFQDKNPGLTEKKDNPSL
LGDDKGTSDSDSDTFSDFVSSVPTQESDRAHDAKLTSTSMSNSGNQDIASVSVLSSQDRS
LDISFPKPVPESQTQMENLSTAPPNTDIDLQMQGSLKDFGYDSETSSAAVDFNVKKTSGE
KITADHNQNIFSSELFPSDLSSLSSDMSLLIHDSLATSIEHVPVYSKQPEHDADIGQLSE
TSVQLPETDIQFPETNVHQLPETNVQFPETDVHQLSETDVQFPETDVQFPETDVQFPETD
VQFPETDVQFPETDVQFPETDVQFPETDVHQLPETNVQFPKTDVQFPEIDVQFPETDVHQ
LPETNVQFPETDVHQFPETNESGNLDVQPGMSFDLLDSQLGQGSGSSSIMSVVEILGKET
SPGATQVEALDAQFGFDLMPPAVGPQAQQDDLITDLHKSNGDVNATPAEQVEQPLINF
>Cuni_T001121-R1  Name:"Similar to Akap5 A-kinase anchor protein 5 (Rattus norvegicus)" Cuni10:568808-576074(+)
MRSDKLAAPTHFSCLMIEATVQQTREATVQQTREATVQQTREATVQQTREATVQQTREAT
VQQTREATVQQTREATVQQTREVTVQQTREATVQQTREATVQQTREATVQHTKEATVQQT
EEATVQQTGEATLSFSPSFCPSWNSYVPVCFS
>Cuni_T001119-R1  Name:"Protein of unknown function" Cuni10:542352-544840(-)
FIMGVGSFTFAFLSGSYAYVVAALMAFIIGLGFGAFQSVDFALVMDVLAEDSDKAKDIAV
WHQSLVLPQALATPLGGFIGLGYIILFIMSSIYFVLSGVFVFKIRRAR
>Cuni_T001144-R1  Name:"Similar to TMEM104 Transmembrane protein 104 (Homo sapiens)" Cuni10:1417575-1436881(-)
MAAEFGKDHVSIQVLTETGAQYSQVVGFVYVFNLIVGTGALTMPAAFKEAGWLLSLLAII
LLAFVSYMTLTFVTETMAISNAKLRLQQVLSQSSREESVDVSVNVDERQPLLKPKVVYTD
VSPSFEITQRVEMGTMAAMFFNRVGMVFFHLCIIIYLYGDLAIYAAAVPKSLRDVVCTYG
GNNGTSNQTLSDDDHCWPHVSLNRMNAYRIFVAVFVLLLGPFTFFNVQKTKYLQILTSLA
RWTAFLMMIALTCIRLAEGKGQGHPVIADIAGVPNLFGVCVYSFMCHHSLPSLITPIRNK
SRLLSVLAGNYSLILVFYLVLSFTAVFSIGNIQDLYSLNFSPHGTEPVTSVVPIQYFLAL
FPVFTLSTSFPIISITLRNNLTAMLTPRQGHLPWYVPKVVCPLLVLIPPVAVALGTNKVE
VLVGITGSYAGAGIQYVIPAVLVLLARRDTLAVAGGYLHRSPFSHRAWVILTLIWACICI
NFVTVNYIISNL
>Cuni_T001113-R1  Name:"Protein of unknown function" Cuni10:325557-327002(+)
RESVIRSQMLPSNMAAKQPGPMMLQDSSPPPASLSPKGHIGESPQQLVHSEMKTNPNGNE
PRGRLAASSVYDNFKSAEISRFLEGRDLHQDKEVKASEIKVPSEKEVGENKNPQADTSPT
ADIFNMSNEVSSPVDVSLPQPVQVSDPPPSLPLYHRFSETRSIPVGFSTSLSQPSAASLN
SPSKDSPQPFQDVLSLTEHDTAVQPLIQNQKKHSPVSSSVQSQRPFESKSDKDLSRYLPL
GGKRQGSYDIHGNTDDNSEHSRLLRHLSKLSHSNTFPKPKMNGMSSDVLSESDEEDTPEA
PANNLQLDLYISEDDLCLSQENLVNSSFSSVSAPSGQASHEDRGLGLIRQSGPTRLGIRK
HQSEESPNYSKIVNRSHAFLQDNARTQSLDNPPGREGVSPDPWRLNSTVAGSPEVETYDN
IVPQTAPQLQNHAYAYDPNDDSAPWDGDMNRAEQRLSLTDEDKDRLQRLRDVLPDQQAIP
I
>Cuni_T001141-R1  Name:"Similar to Cyth1 Cytohesin-1 (Rattus norvegicus)" Cuni10:1272444-1290083(+)
KPDPKAKQISVGRKKFNMDPKKGIEYLMEHGLLENTAQDVAMFLYQGEGLNKTAIGDYLG
ERSVFCMSVLRAFVNLHEFKDMILVQALRQFLWSFRLPGEAQKIDRMMECFAERYCAVNP
GVFVNTDTCYVLSFAIIMLNTSLHNPSVKDKPLVDRFIQMNRGINDGGNLPEELLINLYE
SIKKEPFKIPEDDGNDLMHTFFNPVKEGWLMKQGGRVKNWKRRWFILNDNCLYYFKYTTD
KEPKGIIPLENIQVREVPLEKSRPNSFELFCSGNSEVIKACKVDSDGRVIEGRHSVYRMA
ASSVSEKDDWINCIRASINDNPFYDMLTARRNNATGSGNRAR
>Cuni_T001131-R1  Name:"Similar to PSMD10 26S proteasome non-ATPase regulatory subunit 10 (Homo sapiens)" Cuni10:965850-980582(-)
MAAQTTADEVCKLAYEGNFGILRIKLENYRSLASKKDTESHADIVVFVGNVYLGSPLNNA
LMIASSAGRTQIVYDLLGHGAQVNAVNNNGQSSLHYAASKGHLEICEALVKYGADIECVD
SLGHTPLHRAASRGNLSIVKFLIAHDAPLDLRDATGCTPLHLACEDGNGEVARLLIDHGA
RTDIRNNEKQTAFELAPRALKRSLQSSLDR
>Cuni_T001134-R1  Name:"Similar to DDB_G0275149 Putative ZDHHC-type palmitoyltransferase 6 (Dictyostelium discoideum)" Cuni10:1029154-1051730(+)
MEGQPTPSYKPAPGTQAAAFDMLMNAIGTYQGPVIQQLLNSDPGLVHLKGWHGMTPLHRA
CLVGDYNIVLMFIEANSDVNAVTDFQETPLHYASKRGFPAVVHLLIRCGAKVDCRDNRGR
SALHHAAETGSVEVIKYFEETLGVNTREVDCELQSPMHIVCTHGHMDLFTFLMSKGRSDL
RQADAAGNLPVHISSEKGFGHITWSMLCVLGVSVLRQTNKAGYTPVDLVLQNDKHGHKEL
APVLQFYSRQQDSYRVSGPTLKWYTLLLFPLLLYTTLIIISQNLSSYQFVVFLLPAVFLF
CQNNGFMDHRIDLISRWPNPLFAGIFGAGIFHTVVAYFWILYPYLYTTWWITCLSWTVCP
VLLFLYYRLLRQDPGAMVTSAKDPNTGKTLNLVDLCMMHDPQYIYCPVCDIVTTKVTKHC
RLCERCYLHMDHHCLFLLKCVASNNHVLFLWLLIIASINMSFYCLGFCLYTRAVLPEVAY
TDLFRHLLHTEAWPFSLLCLNVASLMWTSSLIYQQYTVVVKGCTSYFNEWKARQYPLSVH
QSLSNFLHFLVNMPLPHTNPHSPLFTPGATPSANIRNIPALPSNNKYLSDIQVI
>Cuni_T001125-R1  Name:"Similar to all2124 Uncharacterized WD repeat-containing protein all2124 (Nostoc sp. (strain PCC 7120 / SAG 25.82 / UTEX 2576))" Cuni10:672205-695372(-)
MARRALEADLLAKAGIVQTPLTVASAVKVVYEIHLHKTSMGVFCLQFNYTGELLAVGLGS
GGIQIYDAKSGKFSSELRSCRLGGFAVMSLHFHPKEPHILYATTAEGTIHVYNIKTGQEV
ANISELGNEINALDFSVDGYNFVTGGKDLGVRLYDTKTNMMIKLWPGSSSRTLLTSDTAI
GNTMRVFCVKFHPINQFIFVTGGWDNHLKIWDSRDSEGIKRNIRGPHICGDSIDLRETEI
LSGQWTALHALQEHNYNTGAVTREIMFPHTEGAFIYTAQYCNSNLVVAGGSGTNSVEVIE
ISTNRHVGGYRMEHPVHSVDSTNQGRLLAAGGSESLLVILQVTE
>Cuni_T006351-R1  Name:"Similar to GRIA2 Glutamate receptor 2 (Homo sapiens)" Cuni100:22437-96325(-)
TDTWMSSELTEDSFKTIIPEITVQNVTQRVATVIEAPFVMKIKQNRNGMPPVGPNLDLEG
YCIDLIEALARSEQFEYQVYVSKDYGDKNETDGTWNGIIGQLINKERDIAVAPLTITEDR
ERVVDFSKPFMNTGISIMIKKPDKTKPGVFSFMDPLDSSVWYCIAIGFLAVSFVLYFVGR
FSPYEWNVVEDSKERRATTIFSISNTLWFSLGALMQQGSDISPRSFSGRVIGSAWWFFTL
IIISSYTANLAAFLTIEKLVVTIESADDLVGNPTIKYGTKKTGTSWKFFEKSTIETFVRM
KKEMLENADEVLFTDYHQGVKKVRESKGTYAFLLESAMNIYYGQQEPCDTMMVGDTLDTK
GYGVATYLNYPLRHNINIAVLTMKEKGELIKLKQKWWFDKGQCGDQSASKETTGTQSALT
LSNVSGIFHILIGGLVLSMITSSLEYFIHRKCSVWKRNISQKRYDLPVPPPPPPSRSACS
SSKSKFPDTGLAWENGFTSDLGPSNEQENLMPGDSEENKREMS
>Cuni_T006357-R1  Name:"Protein of unknown function" Cuni100:552223-599840(+)
LTPDEHAVSPIMSTNPQPKQKARSAGHAYSYGSDDESDPRITVQVRPAYQPQQQQRQILQ
DHVLYDPPWDHINFDQMRSGHRTGHASESDEDNRHAIQRYSQAGTLPMPPPTFPPPPPPP
IEDIPQRSPAPTRQRSFGPSVRGNYSDIEFRRQQAFAEGEQEMPLENPYLVQNALGAAYS
MGKWMSHPRPPMHRSGSVPSGHSHSMDVSDHYMSSGHSDTYPYHCPNVGDGPVIVHSSDR
QLAAYPPFGGPPSIPAGSYPPSQDYRYYFSSAGSRMKKKIGQRCTWRCTALILLVMCVGL
LACTVYFA
>Cuni_T006360-R1  Name:"Similar to AGK Acylglycerol kinase, mitochondrial (Pongo abelii)" Cuni100:812531-852685(-)
MSFLIKTAKTLRNHWKKSTFFFCVAVYGAKYANDRHNDNLLRRQYCEEAKKYGEEKIQLG
HRPRRVTVFLNPAAHGGKARKLFEKTAAPILYLAGIEVNVVSTEYEGQVKSFMSVLDTTD
TDAVVVAGGNGTVLEAVTGFLRKEDRSFSENIPLGVIPLGSSNLIFRILFGLDLKEVRAL
AESAIAVVRAVTQKVDVIKLDGGESKTIYAMTGLEAGAYRDAEERKTKYWYFGPLKSRWT
YLRTAMKEWPPVFKATISYIEATEENMSSSDSSEALKSNKYSLGWSFVSLLFGKKQNEIK
DADRKAKQLAQDQEDEKNRITKDISTVELTVTTTSLASNTSPVKALQVSLGPSEPTKTQL
INEGWRRIKKSGFEMGSAEDERLVVKKVHIEPKEEGQWYNIDGESFEAMPVEISLLRNKL
NFFCPQNTNSDR
>Cuni_T006354-R1  Name:"Similar to Paramyosin (Mytilus galloprovincialis)" Cuni100:271678-322994(-)
MDYDSDIVVRSSKVSRTYNVYRGSSPTTQNRLEARLRELEDALDSERDGRLRAEKLLAEL
QFRYDQVLDSLEEQGGVTSQQIEISKKREAEVNKLRKDIEMVNAQFEQTENSLRKRHQEA
INDLSDQIEHLQKQKTRIEKEKQTLVVELDGLSGQLESVSKAKASVESKLDAAEQANIRL
KGQVDDLARQLNELTSLKARLTQENFDLQHQVQELDSSNAALAKAKSQLQHQNDDLKRNL
DDESRQRQNLQVQLSGLQSDYDSLNARYEEEVESSNSLRAQLSRVNTEYSTLKARFDKEI
QLKTEEIEEIRRKLTIRITELEDTAEQLRMKNSGLEKAKAKLTVELRDITIELENTQIIV
QDLTKRNRQLENENVALQKRVDELTAENNGLRADKANLEQEVYRLRVANAELNERNDNLQ
RENKQLSDQLREANQALKDANRELADLRALRAQLEAERDSLAAALKDTEDALRDAENKLA
NANAALEKLRQDMEARLREKDEELENIRRSSARVIEELQRTLIEVETRYKSEITRIKKKF
ESDIRELEGALDNANRANAEYLKQIKSLQVRVKELETLLEEERRNADDLRNQLSLSERKR
LAISQELEDARSLLEAAERARKNAEVELHEVSIRISELTIYVTTLTNDKKRLEADVAALQ
SDLDDAINNQRAAEERAERLANENARLADELRQEQENYKNAESLRKQLEIEIREITVRLE
EAEAFAQREGKRLVAKLQIRVRDLEAELEAESRRVREAIANQRKAERFFKELQAQTEEER
KQLAELQSINDQLSIRVKTYKRQIEEAEDVANLTMNKYRKAQALIEEAEARADVAEKNLQ
VVRRSRSMSVTREITRVVKI
>Cuni_T006355-R1  Name:"Similar to NXT2 NTF2-related export protein 2 (Gallus gallus)" Cuni100:340742-349989(-)
LDAMVTTAEDIRTLSSQATLAAEEFSKLYYETFDKRRQAISKIYQDKANLVWNGHILSGS
EAIFKFFDGLPQSEHVVEGMDTQPIAAGTVNDEVSNSIVVTFLGKVKFKGSDFKVFTQTF
ILCSQENKWKIVSDKFRFME
>Cuni_T006361-R1  Name:"Protein of unknown function" Cuni100:865069-896970(-)
MFSCNRYIFADKAMPQRIFRLLHRARTRSQRRRVYAWIVVFSLFLILILYAQHSSVITFS
QVVSREEVKAELSLTADANGDRRGPDLKLLNTDDNNNNNNGNVNNVDDYADDSRADLLPD
LAPPIIHYIWCGNKHFEFRHYLSIKRADDIIRPDKIFFHYQELPKSDSEQYYTWFNQTVA
GNDHIVLKYLNRSTCPESGAERYMLVLSLLEYFGGIFIPEDAILVDFPLHLRSAGFMSGV
VAKTLTEYLDGIIVAKKNGFISPSSQSGLNVVLASGRSAAQGTIKPCGTIEHFNTEEQGD
CICVKSRFSTLTRLAAYGVGEVRPKFSQKSTIPRIAHYICWDCEVKFGPYLSILSALYIA
GLSKVYIHGVKQPTGYWWKKLQETQKVIHVYREYPEHSSNRATMTQELAEGIMRLSILLK
YGGVYCDSKVIWTNIIPEDRFSYEAVASPDWSLYGSWPDSISHTTIMAKKNSEYLLKLRN
LHSQNPRQQFWFVDQFLAYKMLERKPELMFLDRHLQVKCLNQNCHPTWQPGYRAPLNENP
QGAAFNWQNDTLSVHWDVFPDLELETVKYTSGPIVEAARRILHKSGVSIQDLNNR
>Cuni_T006350-R1  Name:"Protein of unknown function" Cuni100:161-3723(-)
QIMGFRRLADAETFFYEHSSEMSYIIEFKMSESVVLLPKVLTVIIHPYRRASQIWNTDEV
YSFERTSTPRSDLLDLEF
>Cuni_T006358-R1  Name:"Similar to Ten-m Teneurin-m (Drosophila melanogaster)" Cuni100:633661-725577(+)
TFWMNHLEQKTPGSVKLNLSVPSDAMVGIYGRRGMPPTHVQFDFFKVIDGTRVGIQSRRA
VVSFRGNDYFARDTALVQFLDRGDWFIGIYNDRETYQSVLLTAAPHEMDTNCPDNCHGNG
ECRDRQCRCFPGYTGWDCSQSVCPLLCSGNGVYLRGQCQCNQGWKGVECDLRESECAVPS
CNGNGHCINGQCVCFQGFQGPDCGIVDCMMPNCSGNGACVLGTCRCFRGFKGRDCNSEDK
INVTQLCSKNCSGHGLYDVETGRCECRRHFSGFSCETDGCPGECNDHGNCRRFKEGWRCD
CRDGWKGEACDLAMETSCSDNLDNDHDSLVDCLDPDCCTTSTCVKSQYCQASPDPKEILL
RKNAPAPTASFLDKMRFLIEENSVQMDAPRNSFNESQVSVIRGRVQTRDETALIGVRVGV
VTQPLYGFTLTREEGLFDILVNGGGSVTLEFVRDPFVTQTASVLVPWNQIITMDTVIMST
ESRAQLSAGTTCSNLDNNHDHYLLRPVVLSTWQHTQLGACPKRSTIIPESQVLQESLNVP
GTDVHLVYHSSESSGYMSLIMIQMTPSRIPHTLSLVHLRVSVQGVEIKKLFEADPNLKYT
FAWDRLNAYKQKVYGIVTARVYVGYQYLGCDHVYWETRSATLNGYDMTASHIGGWNLDIH
HTYNHQEGILHKGDGTNIYLKEKPKKIINILGSGQRRKLDCEACNGKALDNGLLSPVALA
SGLDGSLYVGDYNFIRKLSPHREEIASILQMSTITTPYKFYMTVSPVDGRLYISDFMSHK
IIRVRTMGPVPDLLDNYEVVAGNGEECTPGEADLCGDGGPAVNARLRYPKGIAINKDGII
YVADGPNIRKITPDGLITTLIGTQAQPREWTPMPCDDILSAERVSLKWPTSLSINPLDDS
LHILDHSIVLKLTSDFKLVTVAGRPVYCPPRHSSFLPSGVLTDDEQASSVADHVTLVSPK
CITFGPHGDLYIVESDTHHINRVRVVSTDGRIHHFAGAKSKCDCRQEKCACFNPQETLAA
QALFSDPTSVTVTPDGVLHLADMGNLRVFSVVSELPVLNDRHYEVVAPETQELYVFNMYG
QHRHTINIHTGQYVYNFTYNVFSSYGRLITVEDASQNKIQIKRDYQAQAKEVLSPTNEQC
VLVMDNRHRLHKFLASDNSSATFTYTVNTGLLESKQDSGGQTFLYHYDDTGRLLTIRQPT
GQITTLTTDINTTGSIVRVATGTRHVSAMATYGSVQSVMHGSTQTKVTYLPDGAVVVLFP
SNLTVATETGSHPVMESENRMHYKRKIIVPGSSVHRLEWRFYLRRGGRVRASRVIEKLGQ
RMRVGDLGRQHVVHDSLGGEGRDKALMINGENLLTVEYDRRSHTETVLDKSLHDIITVVY
SSAGLPIQFIPASSHHSMNVTYNSYGDILEWQYGDLIEQREYKDPGLIKQRTLKPGGKQF
RYFYRNHSRKPTDIFLPSGKQYLFKHDKQGNLQSVMTPFLGHHHFNTLLTLGMRRFLYRA
PGFSLPYIEDFDAMGKLLQVIYPSEQRRVVHRYNDMGQRSLTMFDQTLIELTYHKEVLHL
SQASLVARGYANKLTFGYLSSLVHDSSVTFPQDASLVGASFKFSYDNNFRQVETMLNLSN
NISSLSNRSYSNDNGKMSHIAGINVEWLTEAKQLFRDGHIIMTREFDGYGRLMDVTVKFS
GEVKFDLHIDYDKIGRVHEWKRKVDKLKEVAVEYIYDVDSHVTDVLLQGKTAWEFGYDAD
GNIHKITSQGTTRHMEFDVGDKITMMGGVSYKFDSDGLMAQRGLDHVTFNSAGQLISVSR
HGLFKFSYFYDALGRLSVQRDRYGRILQFFYGDMRTKNTITYVYNHTTGELTQYLRDTEG
TLVGLQRSGRLYYIVVDPTQSPIVVFDKDGNIVKHVTYNPLGVKESDSDPDFDLAFGFQG
GLYNPVTQLVHFADRVYDANLGRFLTPDYANVFKKLKTVAEDPEILNLYGHRFLVNSHLQ
NQQYPRMSLSDWLNVLGYDVRSMAPDVTYTGDLNADPQDPDLQLLPAASAFECTFRRDMH
NLLAISTVPQSKVTPLQSLPEEKPAPLDSVFGHGVTISDFDGKTVVNIVDVAQSWAKNLA
TVLLNSSQILPVHFTILGKDVHYFVKPSAQQAVDDLRELGIHSDLVTYESGINVSVHRSQ
HGHGFGLSHREVDVRIHGNHTVLNIRYGTTLDREIRRVLRHAKDRAVAHAWAREKHLLQH
SLPSLYHWSDAEMHQILAVGRVTGYVADYIHQPDQYPELSDDCNNIRFVAEVP
>Cuni_T006356-R1  Name:"Protein of unknown function" Cuni100:505945-506164(+)
MTSAVPVVNGVPSGSTRPVRQGSGTQRAGRKARMKNRGSQTCSSEDEDLHSDDNLRPYEE
VKVAHHDKKLAGL
>Cuni_T006353-R1  Name:"Similar to Glutamate receptor (Lymnaea stagnalis)" Cuni100:209867-261970(+)
SVRTIYLDSYINGGINITGFEVFQEGKTLQYKRKYLKPVKTEEHMSTDTANLLFQSLRMF
QLHQGSTSVFGNVNGWQVTQESTCLPQLRWRWKYGRALAKVFQNMTFVGKSGLIRFDSGG
QRIDYSVDVQAVTMYRGITTVGTWHNDNFEAHGEEQVLDKANRTIDNRTRIVTSIDEEPY
LQSSTEAVDGVPLVGYHRFFGYCSDLAEMVSRNVGYEYHIRFVLDGEYGRKQDDGTWNGV
IGELIKHEADIAIAPLTITSDREKVLDFTKPFMNLGISLMIKKTADTGHRVFSFMEPLSQ
EIWLCTVFAFIGVSVVLFLVSRFSSEEWQLDADSKLENDFTIGNSLWFSLGAFMQQGCDV
LPKSVSGRIVTSVWWFFTLIIISSYTANLAAFLTTMRMSGSIRSAEDLVKQTEIKYGPYR
GGSTYMFFNQTTVPLYQRMWSFMTSQSDVFVKDNDEGIKRVRESNGQYVFLIESTLNEYY
SSRLPCDTVKAGNNLDAKGYGIATPMGSDIRDKLTLSILQLREDGVLDELKKKWWIEKSQ
CPPEVTTKETDASLTLSKVAGIFYILVAGLGLSMISVILEFLYKTKVDSRKQNVSFGSEA
RSKFRLSISGHSEEDSNDQRTPLKSTTSMFTTANTPGDEESVLHKTQTLV
>Cuni_T006359-R1  Name:"Protein of unknown function" Cuni100:741016-743239(-)
LRRNIRCLLSTPAIQACYNTFNQGVNQVVNLQTQNRAPRETLQTLACNVSVARYQCETDI
YSRCDARTGQIMQDFFFAAVPGDCRRATGVRSRYVDIFNAGSVSGGKTSSIVNFMILTIL
AFVWKI
>Cuni_T006352-R1  Name:"Protein of unknown function" Cuni100:182678-198667(+)
MGNCMLSLLFHVSFITTFIFQTVGYKYRIPVGLIIDERHSVLERSIIQHIRQQNEINSYF
EMETKVIKLDTSDSYNVSRASLIITVIHAGYAETETIMFILCSDQIYMEPSLTKPIVAMI
HGDYAWNKMYYFYDSMDAVSRIEQIQDLLHEFLYSSPDIQPHEVTTAKSCLDLIKHLYNT
SSGEPLRIVLDVDPERAKLVIDQV
>Cuni_T016727-R1  Name:"Protein of unknown function" Cuni1002:165799-166098(-)
MQTNETYAVSEQGAPLNPQLPTVTSEEHQKITHTLKPQSGLQWLLWSKMEAIFTCCWFVV
QTFFLIAGLTVLHFSTFSVMVAYLLNGAVRRRREFRPNY
>Cuni_T016729-R1  Name:"Similar to HTR4 5-hydroxytryptamine receptor 4 (Cavia porcellus)" Cuni1002:281306-282406(+)
MANDTKCANLSFVNPDSMITDNLQARLLLTAVFSLVAAMTVLGNFLVIAALISVRFKCFA
PKTNDSSNKTQYLIISMAVSDFVLGSMIMPFGIYSVVNNRRWELGSTLCNVREVFDIILS
AVSFFHVACMAFDRYLAVCWPLLFRTLTQKTIFLMIGVCWIVPTAFVLAIVLSGWHTQGI
EHIVLCSNLQKTCIFVHNKQSLLVIILVLLDCPLVATFVMYILVLREVKKYHRRKPEIYF
RQEQPALQRKLKGITAHGEEISPIVRELKCNNKQIDLAEYNAEMTEVSQCTHQSTGGYDS
VDSDVCTYRQKRSIKTTVSRPRSNMKSKTIYIYIYIYIYIYIYIYIYIYIYIYIYGIRKV
LLHFVR
>Cuni_T016728-R1  Name:"Protein of unknown function" Cuni1002:183727-250186(-)
MSVSQYDDLLGEFADSTVSGTAKTNTIGAFDEDYDPFGPSPGAVQSTNLLDDSARGEIEN
GYASNGVDLDLETNQSLDSADYFHDMSARNQSSYSPNEPGSGSVNLLDDVDSTQSSNPVY
DFGAEATSGSEPADNLFDVDNVGATERAAEEVDFLSGANVQQHEDVDLLQTSQPSSGDAD
LLGDFEVVHREEAVEQKYEPETAEDQLDQPEDLEAEEEQQQYVEEYQEQEEIAEEDKFEE
VGREDVASARVIPAVEVTESPDQGDSQQEESLVGEISKEYISEVEAKEEAEVEEEDVEEN
VEEEHEDEVSAVREDFTEDVEPPSILTTDTDQDSLVVDSLDHDRREKDLEHYCMDREESD
LMEDIETEHHVDSLKPREQRSRSPSRSIGPDIPEDIERRQPSPTPDTDTAEDVDTLRPRE
ERSQAPSRSPEPVEQDEDEHAAADSGLSSRAAVNENRNAGLDDQPTQEYVPDRRAEEGSL
STERAAAAARDTTSYPEPTQASQASSGASRSQAEEEEEEEEGIYENQPAQRDDVVREADT
DRTADLPATGTAHNLREKFILAQQEAAAPSRSTREITPPSHAVGGEYVSEPRGHFDKYEG
KPESGIFESQPVVKTDVITSTTPQEEAKYTSGHAKSTAAKFKEIENQTYTPSGKRELTPD
RSGQVEYVSEPKAQFEVYEGKAESGVFESEPVVNPDVIRAGEEVQEKLPERGTAKNLAEK
FLQISAETASSPVSPRGKREITPDRSGRVEYVSEPRGAHTEDYEVKVDAGVFENQPQRNL
DVITSDTVAEDAVPERGYAKNVAAKFKELEITVKSPSLSPGRRKEFTPPREDERFHLSGV
VENTPDFKSDVIHADDHLEDARPERGTAKNMAQRFRQLETESKTPGSFRAKKEFTPPPGD
TGVYENQPKQFQADYNKPPESGIIENQPLKRDDVVRGDEPPKFEEELPERGAAKNLVNKW
KQLETEGTKVKSPGSGRPKEFTPPREEPRIAEQRKSPRTPLSPSGNEQLDNGSVHPSDLP
GQYQPQNEPSVFESTPEQRSDVLREGDTDWAKGMPKKDQAKKMLARFQNLQAEANKQPSG
PAPRKAKDVRNQ
>Cuni_T016726-R1  Name:"Similar to SNX9 Sorting nexin-9 (Homo sapiens)" Cuni1002:100490-140891(+)
MAEMQAACLYDFEGDEHNGELSFSAGEILQIINQDVGEGWWEARNKAGKHGLIPETYVEI
VQAPEPAFPPPPPPMVGTVPSAPPMFSNNGYASSPPDNVPSSFNHQQSADDWEDDWDDDD
GDSSTSTGHSQEFTGTASTAPGPSKREAKQISPGSELSKYGTVKSSFNRFSQFAKSGGEA
FLMGQTNDKVPECEKIKIIDSVDGPMWLKQDSAYTCIVADPKKDSKMKGLKSFVTYQLTP
SFSNIKVSRRYKHFDWLHGRLEYKFACIPIPPLPDKAVTGRYEEEFIQERMRQLQGWINR
MVQHPVISRSDVFQHFLTCTDDKKWKVGKRRAEKDEFQGGKFFQLLQTPNQALARKEVEA
KMEVFGRFVGCMTDNMKTLLTVNQEYAKKQLGPFKREYAKIGTSYKQLAQTFNLDKSAYS
LALTAAIDYTGDAYIEIGEMFARQPVLDAYPLIEFIHEYKGVLQTYPDVLKVHEGAVGKA
KECQKLQEEGKMTEQQVKNVVAKADVISYGTLAEMNHFQHERVRDFKYMMQRYLQEQITF
YKRLTGKLEEALQHYSQA
>Cuni_T012224-R1  Name:"Similar to Fbn2 Fibrillin-2 (Mus musculus)" Cuni1003:183672-277451(+)
INECEATPGICGNGQCINTEGSYFCRCETGYEPSPDKTRCISAQQGYCYTRVVGRNCQGR
IAERMSLRDCCCSVDMGKGWSLSEQTCQPCPTSGSDAHTRLCNASQPFKIDYCRLFDKLC
ENGQCVSLQDTFRCECNPGFRTDSQGNCVDIDECSQPGVCRNGRCVNTRGSFQCQCNPGF
TLSKDGSHCTDMNECETAKMCANGQCVNMDGSYKCVCNPGFRQSPNQQICFDINECTENG
RLCHNGQCVNTEGSYRCECDTGFQLSPDGAFCLDFDECKRTGMCANGRCQNMMGSYKCIC
NLGFQLGPDGQACIDINECEIHPNICNKGICVNNQGSFRCDCPHGFVLGPDGRTCSDVRR
GLCYPDYRGDRCLNPLPHLMSRSGCCCSLTPPGQTYAWGSPCEPCPSMEDPEFIQLCPYG
KGKDHDRRDINECQQWPDICPNGGCENLDNGYRCVCNPGFRVDSTGLKCLDINECEVNPR
LCDGGQCRNAPGSYHCVCPEGFQFNARSLVCEDLNECQSNPCVGGECINTPGSFKCKCGV
GRILDTTGRICIDNRQGTCWLSIIDGFCEDNLPGLLTQSECCGSVGQAWGSPCAPCPPQS
ELHCPKGYSFKNGVTCVDINECERIPNICKGGGQCVNTDGSFTCTCPPGLSLDTTGRRCI
DLRRSSCYQDYSRMFCSLPFMGLFTRSDCCCSLGAAWGEPCAACPRSGTEDFEALCVDGK
PGEQKDINECTMFPGLCVNGRCKNTIGSFECECNPGFARDSLGTNCTDIDECRISMVSIC
SPGHCVNEPGTFHCECGVGYRGVMMNQMCVDIDECEESKTLCRGGSCINTPGSYECTCPE
GHELAPDGLQCKDIDECSSSSSICSNGHCENFMGGYQCLCNQGYMPNDLKSMCIDNDECQ
DRNGGCQTVCVNTPGSFLCSCGSGYLLLTDGRSCVDVDECKEQGNICDGGRCDNIPGSYR
CTCSGGLTSSPDQKKCLDVDECLLNKNLCLNGICQNTHGSFVCKCDVGYSVKTQIRATGC
TDDNECETGASGCDESAVCINTQGSFKCDCKPGYTGDGFTCRDINECVRDNGGCHRDAAC
VNTPGSFRCICDEGYSGDGFTCQDVDECLLDPGLCENGHCINYNGGYRCECDMGFAPTED
ERACVDIDECSMFRNLCVNGKCENIFGMFRCNCNQGYKLDSTGGNCTDIDECENADNCQY
GTCVNQQGTYICQCPPNFESNPTGTGCIDKRVGSCYLDVPLYSTGRTGICNDKIADEVSR
ATCCCSVGRGWGEVIGFCEPCPKNGSAEATALCPGGPGFKPNLITLELEDINECLEISGL
CEGGECQNTFGSFVCTCRPGYRLDQNKKKCRDIDECEIDQDRCGIGRCINTEGSFQCICP
DGHILMEDGETCMDMRKEDCYREYRNVSQRTQNIVCTDPLSTPQTRFQCCCLFGSAWGKP
CTACPTRGSREYENLCEKGPTKITDINECEVNPDLCRNGRCRDLPYGFRCECFRGYVYDD
VRQICEDDDECQRTISPCLDNAQCINTQGSYQCGCPEGYRLLPDGRRCQDINECEEIAGV
CANGKCMNLKGSLSCICNDGYNLSPLREACIDTDECENRPGICRNGTCVNTPGSYRCHCN
TGFTLTPAGDCTDIDECVVMIGICTNGRCVNTHGSFTCQCPDGYTVSSDKQHCRDVDECL
ELSAMCERGTCQNSEGSYVCTCPKGYQLAPNGRTCLDINECRTLTDVCLDGRCENTEGGF
RCLCPPGFDVTPDGMACIDGRPGTCYDGFEYGRCQAPRAGNLTRAECCCTKASAWGVSGQ
CNLCPLEGDPVFDVLCPGGYGFIPDKSGAISDVNECKVHPGICVNGICINTDGSFRCECR
KGFVLDSSGKVCI
>Cuni_T012222-R1  Name:"Similar to INTS14 Integrator complex subunit 14 (Bos taurus)" Cuni1003:33078-52285(+)
MPTVIALDVSLSMSQPVVLPDVTEEYQRKHLANHGINAFLDYLSSFYKLEFVSLIAFSYL
WEQLSAFTRDYSLIRAALNKVEAFSKTCIETALNGIKTVISDEWNHSSCQPWCRGWVLDV
GEQGGELFTLDGPISFKSVEDAFIRLAEKYYSPFCGTLSCGNFVCPVHLFPKPEPYIRQM
DDGLETHTVTDKLEIIGFIDIKDIGSPPTVARHLVLPKSTKDRGAADKDKENKSGKSEEE
DETLDEGKTPSFTVLLHGSLKVESMVAVTRVQEDWYGMIYSWADSKKKSNLMLALFEPGQ
NAIPWIGPFDNLTSCKEYLPEVIYSDEEKKSPFPVRPTDKRSYAQSCVVWIKPSGLQSDI
QKVLRHARKLPDKLQQFYKELNRTRRAALSFGFLELLEAMAAMLERECRLLPGTAHPDAA
LQLTHAASALRSEVARDVTKTIMALHTNFASGSSA
>Cuni_T012223-R1  Name:"Protein of unknown function" Cuni1003:161476-167877(+)
FKKPCYKVSTSTNANYSCSVLQKHAICVAGCGSGNCVRPNLCMCPGSKRPSPQCDQE
>Cuni_T019321-R1  Name:"Similar to Homeobox protein DLL homolog (Branchiostoma floridae)" Cuni1004:124351-172094(+)
MDGLEQDMMKQQSAFMELQQQSGGIPHSMGHHPAYQIRSQYPGPHPQHHQPHDSVFSGHQ
HGRSLGYPFGMNGMSVSPYQTPSPPRDDKSQVEDQLRINGKGKKMRKPRTIYSSLQLQQL
NRRFQRTQYLALPERAELAASLGLTQTQVKIWFQNRRSKYKKIMKQGGTPPIQPQCSQPP
SHQGSAASPSLQQQGSMGVKQQQASFLDDGPQGSDMHPGSQGSPTPQHGLQHPHPQGTPT
PMLPASSPMSQQGSLLSWSDLGSASSSGHAHSHNQHHAQHQINNAYMSHYSSWYAQSGLP
HQHSLLT
>Cuni_T019323-R1  Name:"Protein of unknown function" Cuni1004:302820-305094(+)
MYHYDKCFPHRMSNETEKNFNLPVNARKKCAPKTRRNFSSSSTNPGYLNNSRSQQMMQHL
QQQQGDQPQLLSPQLHHQMPYPLFSSPAPFLPFGPMSLS
>Cuni_T019322-R1  Name:"Protein of unknown function" Cuni1004:281901-290907(-)
MDIDDDQSVGRNDTDRVDSILVPWLSSNNSYDPSIYNFGDGSQNFSIPAVGGEDDAADLP
VLLSVRLAIIVAVISSIIILAWASLALHRKRIRDSKKRKRRKDTLL
>Cuni_T019324-R1  Name:"Similar to ces-2 Cell death specification protein 2 (Caenorhabditis elegans)" Cuni1004:307605-308016(+)
ADLHLTGFDHQTLAKVYSSISGDKTHGSRGLKNATPEDQKDNRYFERRRRNNESAKKSRD
ARRTREDALANTATELQKTLDALHSQIKKYQWENEQLKQLWVIKCQKSVNKLPYATDSAS
RTKQNSKPNSEFKPEH
>Cuni_T019325-R1  Name:"Protein of unknown function" Cuni1004:318709-322775(-)
MSWSAYIQNLEAGKGRCKYAGIYGKNPISVWAESADKSAFPITADDVATATRAITNQDMS
LMSSGLKIGGVLSFTCLRMEPDLLICQGKGDYKDYSLVIALSVQAVIVGFNPDAEVKTAY
VRDAVEVIRDHLKNVNY
>Cuni_T009560-R1  Name:"Similar to cirbp Cold-inducible RNA-binding protein (Lithobates catesbeianus)" Cuni1005:19453-30653(-)
MERVDGQTCSLPCLKDSYKGHSSQSVVVENVGTTYLHEEDGSLANLNEMVQSAGSLHTEE
SDTTITSEQQNHVTALTDSSLPSLVNDKSDKSTIFVGNLPNRTIRWQELKAFFSKFGHVK
YAKIVKDLTTKRSKRYGFVEFSNCEEAHRALNAAPEELCFLGKFLRVNLTHRTPERKDTR
QADVSSDSQSSCQMAAAQTPSHINILTDDSLVHVFEYLSPLELLRIEAVCKRWQECALVA
ARQKKFMILTRHCPFITSMKGGGFYNLLSKCCNLVSLDISSVVMFLRGMDPLKVI
>Cuni_T009568-R1  Name:"Similar to UPF0764 protein C16orf89 homolog (Danio rerio)" Cuni1005:324331-335776(-)
MRSTQARRLSLSISAFAVVLLASVCPCLLCQTDVKETDLYKALLNDVMSALLKTVDFFGS
NYQYVNIDAVFGMRQCQGSLIGVLEDCEQNKLVCPQELRQEIASMIERLNDTTRQANVYT
EGQNEVRFSVFKELMQKPFVVKYIPENISSVVEVSVPFSVYKGEQGDACLVNLMGFELLG
GAVPRCTVSDTCRWFMTRDGSGYYYLTHQLLYLMIAEQVGCESKLEQEILRNTGVTTRDF
QRHLCEKIYCNIRNLSLNGTVDSEMQDLFLEEIAFCGMLGFQNFFNESWIPLILDWQTPQ
GCFTSPEARDKLQKLATQGRTKFIAIQKLFEHAKFRSKRTEQLMLDGCLSHKTGVAIAAM
GAYIRYLVSRVYG
>Cuni_T009561-R1  Name:"Similar to BXL2 Probable beta-D-xylosidase 2 (Arabidopsis thaliana)" Cuni1005:40375-70705(-)
MVLQYMFCVLFLCSLDRVVNGQTYPFQDTSLSWEKRVDDLVSRLTLEEMQVQMARGGVGE
RGGPAPAIPRLGIGAYQWDSECISGAARAPENATAFPEPIGMSASFSPSLMFRVAAAIGT
EVRGKHNDFVKRGVFGSHTGASCFSPVINIVRDPRWGRIWETYGEDPFLSGVLSQKYVKG
LQGNDTRFVQATAGCKHFDVHGGPERLRSHFDAIVTDHDWRMTFLPAFRKCVQAGTFSLM
CSYNKVNGIPACAHKQLLTDILRTEWNFTGYVISDQQAIENIIHSHHYVDNDVDAAAAAI
NAGCNLDLGNDIVQNVYMSIVEAVRQGKLTEEVVRERVRPLFYTRMRLGEFDPPDNNPYA
QLNNSVVESPAHISLAVEAATKTFVLLKNQNNILPLKQGAYKNIAVIGPYADNNDLLFGD
YRAQQDRSFTKTPLQALQELYPSVKHAQGCNDSTPCLSYSSSVTQGVVVGVDLVFVLLGT
DSQAKIVLLLFNAGPLNVSFVDESDRVDAILACFLPGQATGEALVKVLTNSDGKSSPAGR
LSVTWPKYESQLQPFINYSMEGRTYRYLKTEPLYPFGYGLSYSSFQYDGMELGDLSSPTQ
NLNVSLSVTNTGKLDADEVIQCYLEWGNQSLPVPQRQLVYFNRVHIPAGQKIQHSFHILW
DNWAFRDNGQWSIQEGSMTLFCGGQQPGQKRKIPSSNVVSLPFIIPSSTRLAVL
>Cuni_T009564-R1  Name:"Similar to Unc119b Protein unc-119 homolog B (Mus musculus)" Cuni1005:153383-163195(+)
MNLEKKHSKTESQSTTTKKKKGSLQKQPKSKMNFVTEEELLKKDFISPDDVLRLGRSTEN
YLCPPEANIYGIDFTRFKLRDIDSNQVLFEVAKPPPPCDAEEEEEEEDPNSGRYAHYHFT
PRFLQLKNVGATVEFVVGAQSVSKLRMIEKHYFRDRVLKSFDFEFGFCIPHSRNTVEHIY
EFPKLSDETIKEMVQHPYETRSDSFYFVEDKLIMHNKADYSYSDDIPSS
>Cuni_T009562-R1  Name:"Similar to BXL5 Probable beta-D-xylosidase 5 (Arabidopsis thaliana)" Cuni1005:90645-121563(+)
NDSRFVQATAGCKHFDVHGGPENIPVSRFSFDAQVSDVDWRTTFLPAFKKCVEAGTFSLM
CSYNRINGVPACANQKLLWDILRGEWNFTGYVVSDEGAIENIISQHHYLNNSVDTVAACV
NAGTNLELSGNLQNPVYVSLVDAVSQGKLTEDVVRERVKPLFYTRMRLGEFDPPENNPYA
SLDGSVAESLEHQALAVEAAIKSFVLLKNTNNFLPVNPAAYSNVAIVGPMADNVGQLFGD
YSPQQDRSFTKTPLQGLQEIFPNIRTGKACLDKTPCTSYNPEIIMDAVAAANLVFVALGT
GQAVEAEGRDRANLNLPGNQSALLTDALLYSNNSPVVLLLFNAGPLNLTLFDPVDRIVAI
LECFLPAQATGDALAAVLVNKGGNSSPGGRLPITWPKYESHIPPIVNYAMAGRTYRYSEQ
EALYPFGYGLSYTTFEYPVLAVSYFDQPKQNISVGIDVSNTGNVQADEVVQCYFVWENKT
LPVPLIQLIYFNRINLPPGGQQSLRFNVTWDKWAFWDGQQWSVDTGLIDLYCGGQQPNQN
KAAPSNVLEVQFQVYGDQAISKQHKHHHEPLHVDRPVAKEHVVKAFHHPK
>Cuni_T009566-R1  Name:"Similar to sult6b1 Sulfotransferase 6B1 (Danio rerio)" Cuni1005:205040-216102(+)
MATSDELGPLAQLCHRTTGFKDTAGVKDAAGKGINLTLYDGKLFTPHGVEYLDKVKSVKI
RPDDIILSGYVKTGCHWVWETLGMILKGKGEYSPFCKQIAYLEMAAPELYDNLDSPRILN
THHEYDYLPDEVKEKKTKIVLTTRNPKDTAVSLYNHQINLYEVYNYDGQFQDWFPLFLDG
KVDNGSFFDYYVSWERAINEHPDHPILVVKYEDMKKDLKSTIRKLADFVNVTLSNDQVDE
IAKKAEFSSMKQKFKGLSTEKLIRKGEVGDWKTTG
>Cuni_T009565-R1  Name:"Similar to CHST15 Carbohydrate sulfotransferase 15 (Homo sapiens)" Cuni1005:180927-198484(+)
GPFDYDSRTKSPCWNDTGILRCLPYAYIVGFSKCGTSDLFSRIIQHPDVVHFGLKEKHWF
DYFRFGTDTRFIQNYTDKFANMTLRIESDLRQLGFSYKITVDGSPTYSWGSLNWPCYEGN
EGLNEPLFTNADVIHRLTPSAKIIVSMREPVSRLYSRMLSWIPEQLHPAYVDPTPEKFHT
FIEERVRMYRQCFTQWSHRQCAYNGTLYKEAVLRLAEGAYSVYIKDWLKVFPREQLLFIK
FEDYIADANATVRKVYKFLELVNVGRFYHVGPMLNKTMDILEDFYKPFNEELAQILGDPH
MTWKYNES
>Cuni_T009567-R1  Name:"Similar to CUBN Cubilin (Homo sapiens)" Cuni1005:311525-314332(+)
SGEICTTCARTGYRVIRVNASCGEFTIKTPFFGRGNYSNNSNCTFVLQSGPQRLVLSFLF
SHFDVEKSPLCGHDSLCLNGRRFCGCLTPGMLLEYTLPALSSFTIFFRSNNMVTSSGFK
>Cuni_T009563-R1  Name:"Similar to BXL2 Probable beta-D-xylosidase 2 (Arabidopsis thaliana)" Cuni1005:127464-150265(-)
MTMSSSCLLGHLTIANLCAYVLPSSLYFIPHQIVRHKMGDFPFWNTSLPWNERVDDLVSR
LTLEEIQLQMARGGSGEYGGPAPAIPRLGIGAYNWDTECLRGDAETAGNATAFPQALGLA
ATFSPDLLFRIAAAVGSEVRGKHNDFVQRGIYASHTGASCFSPVINIARDPRWGRNQETY
GEDPFLTGILAQNFVRGLQGSDPRYVQASAGCKHFDAHGGPEDIPVNRMTFNALVSDTDW
RMTFLPAFKKCVQAGTFSLMCSYNSINGVPSCANKKLLTDILRDEWNFTGYVVSDESAIE
NIINDHHYLNNSLDTAAACVNAGCNLELSPNLVQPVYLSIVDAINQGKLSENLVRERVKP
LFYTRMRLGEFDPPEMNPYAKLDSSIAESPEHQSLAVEAAVKSFVLLKNQDSILPLNLTA
FRRVAVIGPMANNISQLFGNYSPNQGRSFTKTPVEGLKLLFPKLVNGTACEDGTPCKIYN
SSVVKRVASGADLIFVILGTGQVLESEDTDRPDVNLPGKQQLLLQDTLSFNPHARIILLL
MNAGPLNISVFDESDRVSAIMECFFPAQAAGDALAAVLSNRGGNSSPAGRLPMTWPRFDW
QIPPMVNYSMEGRTYRYLKTDPLYPFGYGLSYTRFVYMDLVLSDLVLQPQQNLTVAVLLK
NVGDFTADEVLQCYISWGNQSLPVPVRQLVYFTRLPVAARHQVNHTFTVSWENWAYWSHG
EWTVQSGIMNIFCGGQQPFQKKQVPSNVLTKTFKVIRTA
>Cuni_T018721-R1  Name:"Similar to celD Endoglucanase E-4 (Thermobifida fusca)" Cuni1006:333958-342002(+)
MNAVWHFLLATSVINLAASDVDVNITNHWDTGFEGSICIVVTKELDGWTGHLIFSEDVDT
VESWAAKVTKLSGKEFVFESNSFIAQQHVGAHLCFAFEAHVGGNIVPKATFYIEGMDGHG
VNSSTSQNTGGGTPSKNYAEALGKSILFYDAQRSGKLPANNPIKWRGDSALDDCVPGGWY
DAGDHVKFGLPMASTTTLLLWSLYAFKDGYVKAGQLDMMYDMIKWPLDYFLKAWNPTTKE
LTAQVGDGNVDHKFWGRPEQMTMARPCLIISESSPGSDVAAETAASLALGAIAFKDKGDT
AYSTQLLNAAESLYAFAKANR
>Cuni_T018719-R1  Name:"Similar to celD Endoglucanase E-4 (Thermobifida fusca)" Cuni1006:287701-294545(+)
MSTTTYFLLWNLLVTSLLTTVSRGETNVPVTGHWFDGFQAEACIPITKELRGWKAHLKFT
EEVHSIDIWAANQNYNGEEHVGDSLCFSFVGHVTGNVVPKITIYIEGMDRGGGGGRSQGW
GELEGLSLYGGGTANKDYKDALAKSILFYNAQRSGKLPANNPITWRGDSALNDCVPGGWY
DAGDHVKFGLPMASAATMLLWSLYSFKDGYTEAKTLDAMYDMIRWPLDYFLKAWNPNTKR
LVVQVGDGDADHSYWGRPEQMTMARPCQEVSTSSPGSDVAGETAAALALGAITFKDKGDT
TYATQLLTAAESLYAFAKSSRFVALNKVKM
>Cuni_T018720-R1  Name:"Similar to eglA Endoglucanase A (Bacillus pumilus)" Cuni1006:306167-324973(+)
MDLRNLLLVTAILLPLEIAAVDIPITDSWFGGFQAGACVAITTSLNGWTASLKFSDDVHS
VEIWVAKVTKVSSREYRLQNEAFNPILNVGDQFCFSFVGRVTGNVTPKITFSFNGVGDSG
SVASTPSSSSSSTTRSSSSSTTRSSSSTAAPSTGGSTANKDYMDALAKSILFYYAQRSGK
LPANNPIPWRGDSALSDCVPGGWYDAGDHVKFGLPMASTTTLLLWSLYAFKDGYSAAQQL
DAMYDVIKWPLDYFLKAWNSNTKRLTVQVGDGNADHSFWGRPEQMTMSRPCQEVSTSSPG
SDVAAETAAALALGAITFKDKDTTYAAQLLTAAESLYAFAKTSRGVFSGASPFYVSSGDK
DELCVAGVWLYRATRNAQYLNDARSFSDGAYIWALSWDDKRAACQELLYEETKTSSYRDA
VTGFLQTWLPGGSVAYTPCGLAWRDQWGTTRYAANVAFLALVAAEAGLNTAQYRKWGVEQ
INYILGDNKHNGGCFSFEIGHGKQYPQQPHHRGASCPNLPATCGDAQLNADAPSPQILYG
ALVGGPDRQDFYQDKRTDYIQNEVATDYNSGFQGALAAINHLVATNNFPQTNNKCPCNP
>Cuni_T009204-R1  Name:"Similar to Zdhhc11 Probable palmitoyltransferase ZDHHC11 (Mus musculus)" Cuni1007:200199-212328(-)
MSTTEDVKYNEHSRNHGWNCPWHSLQVVAWIVIVYFVIIHYGCFIPSLISASQIPLYCVT
TIFVIGLVTTLVVATSLDPAISAVRDKGGNKKVQKLDRSKHRHAIEDKFCALCEVSVQDP
KAKHCSACNKCVAGFDHHCRWLNNCVGDRNYKWFFATLLFAIMASLIVTCVGLTLFIGFF
IDKSNGHIFQVYKDAIESESERPATLEMFQKPVADSLFLTFDVITVVLAVIAFGFLVHLT
QFHIWLIYKGMSTYDFIIREREKNSENQVSSLGEIPVTKTQPRKANKITPSKQERSNGDS
VKAEDDLRLYQKSLEVSEMVERGETPPPHATPIRDKKPHRDNGHMNDPEHSTVKRPLPLP
HLQKGLSVLSSADVQCHTESEYPSNLLSCRNQGQDKHTTGYTVLDNESPTAKLSSHDSSM
EGHPDTSCGSNIKTLPLTPIPKTKWHQQQIPPLDLSSLRASKESSNSYKPYTGTSRSYDT
YRFTDDHNPQGYLQTLTESVSDTVF
>Cuni_T009205-R1  Name:"Similar to IPO4 Importin-4 (Homo sapiens)" Cuni1007:237857-279785(+)
MAASLEGILSRLLQPDNDVIQKATQDLKEAFKNPDTLQNLCHILGTSTQPQIRQYAAVLI
RRKIHKLKQWTQLDESIKNNIRENILHLLVHEQEKSPRAAISQIIGVIARHDTPNNQWPA
LFEFLVRFLKDEDPSKRETGMVVLTSVTSVAAEQMKPHMVSLLNLLADSLGDRVNIEVAY
LSVKAMTDLIFYIGDDEMKHIQNVVPKVLEVVQILAVHDEEKACVALEFFDELLESEVAI
IVPHLKPLLQYCLQTASNKDYTDALRVKAMSFVASLVRLKKKTVMKHHMVEPILQVLFPI
ICEDDEEEDDDEEEAESHSPSQYAVQVIDTMALHLPPEKFLKKVTPMVEVCLKSIEPSHR
RAAYLVMAVVVEGCGDYVMNKMLPQMLQMVCQGLNDPSHLVRNSVLFAVGQFSEHLQPDI
SKYASQLLPLLFQYLNKSMEEVDKNPKGVIKSHYALEMFCENLGAGILPFLPELMGYLLN
VIHNCHLDKPKELAISAIGAAANAAKEEMRPYFKDILELFKGFLTTSTEVKEEEKKLQLA
AIDTLAVFARCIGEETFRPLATECVNLGLNLLNSSSDPDLRRCVYSLFAAISTVMKSDMA
DYLETITNCIFTSMKSTEGVKAHYKNESDCVTVFDEEDFNEDDDLETENGDDEEDYKLEG
ISVENAYLDEKEDACCALGELAYNTGPAFFPLLQKSYAEVVDLVNYPAVGIKKAAFSTLC
QLCLCVHEAYKATQSPEAYEALKNMILGVVPRYLEAIKSEMDRTVVMSAVDSLQELLDKI
GQIVLSITGATDAILTAMKEIFTHKVACQDQDDENEDEAEFDSMLIESAGDVLPVMARIM
GGENFLPFFTSFVHDLLKRLKETSSTAEKSFAVGTLAEVIEACGSAVGSVFTNTLYPVFT
RMTTDEDEEVRSNSVFALGVLAVNGGDVMVSHYTDVLKTLFSVMSTESNPRVLDNVCAAV
CRMIWYSPQNVPLAQVLPVVLQLLPLKEDFEENVTVFTCLLKLYSENVPELIPFIPLLLT
VVASVVRTENIKD
>Cuni_T009202-R1  Name:"Similar to vac14 Protein VAC14 homolog (Danio rerio)" Cuni1007:110914-144090(-)
MTDKEYAPLTAACVRALVDKLYEKRKSAALEIERIVKELSANNQVDQIKKLLRVLEEFAS
SQNPNTRKGGLIGLAAVAIGLGKESCSYINNLVRPVVMCFHDGDSRVQYYACEALYNIVK
VARGAVLPHFNEIFDGLSKLAAHPDQNVKNGAELLDRLIKDIVTESSSFDLVAFIPLLRE
RIYTRNPFARQFVVSWIEVLDAVPEINMLVLLPEILDGLFQILGDNSHEIKKMCQGVLSE
FLEGIRRSKNGINFTGMANILIIHSQNADDLIQYTAITWLREFIALAGRAMLHHMAGILN
AVLPCLSYTDESRKKVREAAESLNQALRKLVEAQDDQPTPTAENITFYSEVASNEKQSLD
SPNRGSAIQLEILSLIKVLQRLLGHETIQARIAALKWFNLLLVKTPNKTFRHIEEFFGLL
LTTLADPSDDVVLLDLEVLSEISSNPAGFGAVPGQPEGGATTPSSDKSAGELKLNPYFTK
LMNGLIEWFKKDKQLLEDRGAFIIRQLSIYLSAEAIFRSLAEILIEEDDVNFACTMVQCL
NTILLTSTEIYELRSQLKELATEESCSLFCCLYKCWSHSPVSLMSLCYLTQNYKQAYRLM
QIFGDLEVTVDFLKEIDKLVQLIESPIFAYLRLQLLEAHHNPELIKSLYGLLMVLPQSEA
FKLLRYRLECIPQINLTLALDTDTKQRGEERSLVKKINFDSLLDHFLSVQAKHREYKRKQ
VAYKISAVKNIDMK
>Cuni_T009206-R1  Name:"Similar to SLC7A8 Large neutral amino acids transporter small subunit 2 (Oryctolagus cuniculus)" Cuni1007:285342-322512(+)
MKSDIVLEDVCGAVKVPANQKVELKRKITLWNGVAIIVGTIIGSGIFVSPKGVLQESGSV
GLCLIIWCLCGLISLCGALCYAELGVTVTRSGGDYAYIREAFGPLPAFLQLWVSLIVIRP
TAQAVVALTFAYYTLQPIFPDCNPPPAAIRLLAALCISLLTYINAASVRAATRIQDVFTA
AKLAALVVIIITGLVLIGQGEVEHLSDPFQDTVSDVGSISLALYSGLFAYAGWNFLNFVT
EEMVDPFRNLPRAIYISIPLVTLVYVMANVAYFTVISPREMLASYATAVTFGDKVFGAAA
FVIPVFVALSTFGGVNGLLFTSGRLCFVGAREGQLPSLMAMISQQQHTPLPSVLFTGGLS
LVMLISDDVYSLINYLSFAQWLSVGASIAGMVYLRFTRPDMPRPIKMPLIIPFTFLAIVA
FLLIVPLVAAPFDTGMGILLVCSGIPVYLLTVLWQDKPRWFLDWIANATTFGQKLLCVLS
PEKH
>Cuni_T009201-R1  Name:"Similar to TkR86C Tachykinin-like peptides receptor 86C (Drosophila melanogaster)" Cuni1007:6684-12543(-)
MASTTIKSQGIRNTSWAEGELFTWHGAEFLFIPAMMVVGIVGNLLVFYIYHFRWTSNSVT
LFKRMLAVLDLASLTLACPALLYLTARSRSSAFVATCIFTSFVALGTAIASSCVLVIIAV
DRFLKLCLLRKTGVGPRLSKQLFAVSVIFACAINVPCVWIFGMSTIYYQNYHVQITYCFI
SNESKNTPIFLVYSALLVFVFITVSTVLVVLYYKIVKTLRDLSNKHDELKRRPSLATGTE
ALKKEKQSQVMRNSAMVFIAVTVVFFASYAPYFVTLVLSMTETSVEGAMSPAGKAFYDLA
KLCPLVNNMANPFIYSFTSDRFRDEVKKMLTFKTCEKGFFRRRALSLGSRSQELSHFSDS
RES
>Cuni_T009203-R1  Name:"Similar to Slc34a2 Sodium-dependent phosphate transport protein 2B (Rattus norvegicus)" Cuni1007:150573-178347(-)
MAEESTQTSTWLLNCPEIPNGGNEKNKKHTTSKDGKKRSKPWSKLHPIQKILKIVGVLFR
ISTLLGILYCFVCALGLLEDAFQLLGGRTAGETFRNSQLLSNPVAGLMIGVLATVLVQSS
STATSIVVAMVASEVIPLHSAIPIIMGTNVGTSITSTLVSLAQAGERSEFRRAFAGATVH
DMFNWSAVIILLPLEVASGYLYHLTRAIVSSLDLHVSTQKPPMLTSITEPFVHLIVEINR
DVITDIAMEPNVTEQSSVMKRWCQVTMTQKTVSVMRYDPVEVDCSQVTRGSPFYSSCTSK
NILNTGSSGGPGTMGFFLGWNETEVINSTLHRTKCSNLFAFTDLTDKAAGVILLVIAIIV
ILSSLFGIVKILNSMLQGSVAKVIQRTVNADFPGKFAYFTGYVALLVGCGLTVVIQSSSV
FTSTLTPLVGVGIVSVERMYPMTLGSNIGTTVTGILAAMSVKGKHSDQALQIALCHLFFN
LTAVAIFYPIPFMRFPIPLAKMLGRITSKYRWFAGVYLVGMFLVIPVIVFALSYAGWIYL
LIVGGPLFLLFLVVTIINVLQVKHPNYLPLRLRNWEFLPLFCHSCSPYDRIISCHCLTAH
CPKFDDSDDEEYDDDSEEIKVPEVDDHFRRHPQVIAGNVKGQSLSLA
>Cuni_T010906-R1  Name:"Similar to P4ha2 Prolyl 4-hydroxylase subunit alpha-2 (Mus musculus)" Cuni1008:296091-336757(-)
MMFHISFTEVYTSSRKIQDMVLQEQQILNNLQAAVTELRNETALLLFSKFYRDRVFKVEK
RRYATNPRETLSHPNGIYFYIKHFATDYENIRSVLEHAQSWSVRKYLSSVADQADVRGAL
RSFLRLQTVYNLSTSDMIRGNYFGRLGPELGQEDVMEIGRAALDSGRVERAIEWLEAALQ
LVDNKEPTVGFHLFESGTSLTGQIQALLGRAYNHQGDRQKATEMYKMAVSLDPQNVQVKQ
LERELEFRPPLAVDPSTQRPFKEELGRLCKLQNKLTKNKFDRRLNCTYRQVLLPYYRFKM
ELISVTPYVALFFDVITDEEINGLTNYATDKLKRGVVLAGRESIFVESRTSDTYFVTNEE
SPIADRLSKRTGAILGLEAAHDKQDSFLSSDPFQVVNYGMGGHYDVHLDSVNK
>Cuni_T010898-R1  Name:"Similar to P4HA2 Prolyl 4-hydroxylase subunit alpha-2 (Gallus gallus)" Cuni1008:23604-47505(+)
MCFQETFDPRICCRYKEGILPYYRFKQELLSVTPFVTLFYDVITDKEIDALMQVARDKVQ
FLTGDPRQFVSFGPNVRENILGIKGGWREIANYGIGGQYGLHWDFLAEALKEEVRNHEAS
LYGGDRLATFLIYLTDVERGGSTVFNKLGLAVSPVKKMALFWYNAKPSGELDYTTQHAGC
PVVVGHKWVSNKWMWNYGNTFTRRCGLTPDATQLDIELYMRKGWV
>Cuni_T010902-R1  Name:"Similar to Armc6 Armadillo repeat-containing protein 6 (Mus musculus)" Cuni1008:193763-206894(-)
MAKQISQQTFDDVVRENMSEFDMDASEAVQDAIQQFESQGVNLNCIVKEPSLYSTNEDGQ
VLDHPVTSALKKLSVTLDNSDINNTQVVEALKSIQTECDSDFARRCLAGSSNAYPILYKA
LLHYRDDPEHLKAVLKTFCSLVNGQPDLIDDKGIELLICLFKNYQDVSDVLKLIIRAIRL
NCLKHEKNRQEFIQMNLIPMLTDLLTVQKSNPTIIKESCICLRSLTLDDDVRVLFGKGSE
NAKSMVSEGDALRAVLQLCEEYKKDTSVLAELFLTLSCLAIRDEFCHEVMDRGGVTLILN
ACRNAIEDKNIVRQAMIVLKTLAGNDEVKHEIAKLGGIELIVAVLDKYQNNALVAEAACK
VLTTITLRNEDNCRKVVQCQGHEYIVQVMKLHPKEIGVQKNACMALRNLVSRTKELTESI
LPLGVESLLNEIINHHKEIEDEAKAALRDLGCKVELRELWKGEKGVIQ
>Cuni_T010899-R1  Name:"Similar to SGPP1 Sphingosine-1-phosphate phosphatase 1 (Homo sapiens)" Cuni1008:69636-91030(+)
MDLIRLLADPAPVARLQRFCGVEYDSPITCDQHTQTRKVSIGSSDPVKEAQASITPPENG
CKDSAEVHNGDTNCMNIYQEYDYTNAQEPNNNFYKKNRRNYLNSEDEQTKCKSRTYAQTN
GYHVICQDSKHYNGVSKTDCSNGSLGEFPKAVDESIPEETNNRIDRVNTPTVRIKYKSLF
YLARFGAFLGHELFYLTFFPFLIWNLDSLVVRQVSMLWCVVMYLGQATKDYLRWPRPVCP
PVVRLEIHYSREYAMPSTHAMSGTAIPLYLAYLAIERYQVPMSVAAALALCWFCVTCWSR
LYLGVHSILDLLVGFVYALAIFFTFLGYVEGYDLYQQTHPFSGPVLLFTGLTMCTVLYPT
HHKNSSKADAVQIVAAYTGFAIGNWLGYQLGYMQESDISKPYSIAVPTLSWCFVSLLRFI
TGVAVIGFLHTVTRWWSIRFFSYIYGLGEPDKTHPGVMMAYKFTTYATVGSGAALFAPLL
HLRLGIHRPALFYEVL
>Cuni_T010903-R1  Name:"Similar to GEN1 Flap endonuclease GEN homolog 1 (Homo sapiens)" Cuni1008:207311-228843(+)
MGVGGLWSLLSPVGKEMSLEFCKGKKLAVDLSAWIVQCSVVATSKPIPASYLCCRGIFMR
TLNLLSLGVSLVFVIDGPNPPAVKRRTKSRDDFYRTALEYKVLLTALGLPVIECDGEAEK
LCAELNLRKLVDGVITNDGDALIYGAETVYKGLLQDKKVDHIAMVYHMEDVRTSLNLSRR
DLVAFALLSAGDFSLGVPNIREKKFIELMKEFKINNIEDALHRFMTWSANTELDCLDQKM
KSLADMKTRHCTKCLHEGTKQEHVHSGCQVCQVDSECRQGDSPDHPPCLCEYHLAEESVK
TYKMELKIRELALKSDPGFPDRAVIQEYLQPLPQMLDDVDLCVRVPDFPAVCSFIQERLH
YSFQHTMSYLVPATIKMAIHGVLPDLAVTPRCIIKTCKVNFEQCFLVRWKKLDEDELSDE
SSYAFHLSQTLFASKYPDMVEDFMGATRCKNQAEEGSRRTFLQTVHDDIKDNKG
>Cuni_T010904-R1  Name:"Similar to ALDH7A1 Alpha-aminoadipic semialdehyde dehydrogenase (Bos taurus)" Cuni1008:242156-272328(+)
MSTFLIEDPKYAWLKDLGLSTKNNGVYHGRWGGSGEVVTSVCPANNKPIAQVTTGTPADY
EAAIQASRAAWETWADIPAPRRGEIVRQIGDAFRVKKHLLGKLISLEMGKILPEGEGEVQ
EYIDICDYAVGLSRTFAGHVFPSERPGHLLLEQWNPLGVVGVITAFNFPCAVYGWNSAIA
MVCGNTLLWKGAPSTPLVSIAVTKVVSEVLESNQIPGAVCSLVSGGADIGTLMAKDERVN
LVSFTGSTPVGHKVSLMVQERFGKFLLELGGNNAIIVNKDADINMVVRAALFACAGTAGQ
RCTTTRRLILHENVHDEIVERLIKAYAQLRVGDPIEEGTLYGPLHNEDAVKKYTEAVKAA
IAQGGRVEYGGKVLDIPGNYVQPTIITGLAHDAAIVLQETFVPIVYVLKCK
>Cuni_T010900-R1  Name:"Similar to RP688 Uncharacterized protein RP688 (Rickettsia prowazekii (strain Madrid E))" Cuni1008:139129-139755(-)
MTRNGLDYMLYGGSLIGSYRHHGLVPWDDDVDVLVPYSNKSVLNEVLSSVSPQHVLNKDW
DFTWKLFSVKADEIRGYSWKWPYLDIFFYAENETHIWDVAQQYKQNYVFPKNIVFPLKRR
PFMGLRLLTPAKPRSVIDTNYNITLCQSGKWIHKWERYGTETSVSCSELYFKFPFVFRTF
QKGGCNESLFHNDTLIGYYFEEDTPCDR
>Cuni_T010901-R1  Name:"Similar to Parp16 Protein mono-ADP-ribosyltransferase PARP16 (Mus musculus)" Cuni1008:175072-185583(+)
MNGDSTQDTTNTSGGEDSSTTADSSGITVGDSSSAKENTSGITVGDSSSVKENTSGITVG
DSSSVKENTSGITVGDSSSAQENTSGITVGDSSSVKENTSGITVGGSSSTQEDTCRTASG
ESSSTTDFRQDAPLFVSDIQTLFVSNKSLLSCDLLWSLFVSAARSYRFSSVLHPFPPMYH
VNSQDEKNIFALRNTVSKVPHFSTAVEFVSSLSQECKELLSWVLLPNNFRLKLKQKNKCF
QLIKELTGQVMDTAEPNYIFEIVYNEERERKFKELQGARKTFHGYHGSRFDNFYSILHSG
LNAHLNKVSVFGEGTYLSSELSVSLIYSPTGESWKNSGLGGKLSCVCVCQMIDDPSVKCQ
VKNESLTKQKQRAQASRDADAVPEKYYVVQNNDMMRVKYLLVYKHESRPQQGARLESSSY
TWLRDHKFPLLMLAYVLLLVAIGLANSRHAMNAISRVFKSIS
>Cuni_T010905-R1  Name:"Similar to phy-2 Prolyl 4-hydroxylase subunit alpha-2 (Caenorhabditis elegans)" Cuni1008:290564-293639(-)
KMALFWYNYRPSGKRDLLTFHAACPVVFGQKWVTNKWIYLHANMFKRRCGLTQKATQLDI
DQYMVHGWF
>Cuni_T014964-R1  Name:"Similar to PPP2R3A Serine/threonine-protein phosphatase 2A regulatory subunit B'' subunit alpha (Homo sapiens)" Cuni1009:206033-239044(-)
SPRIPTKTQVDIRDRENKVKKRGSRPYSSMHIPQFYFPSGKPATGLEVETILQKVAQVFA
GLEGGKAYKQQMGAITKASGLPLFWKILLFRSAGGTSDGFISYQSLSILLKKLYQSCHDE
ASKFMRLVAKPGASVLDFEDFEPLVQDVVESHPGLTFLQDAPEFHSRYVTTVISRVMFCV
NRSWTGKITVPELRKSNFLQTLARLEEEDDINQIKDYFSYEHFYVIYCKFWELDKDHDLF
IDKNDLSRHNDHALSSRLVDRIFSGAVTRGPEFHEGKMSYKEFVWFLLAEEDKRHPTSIE
YWFRCMDLDGDGVISMYEMEYFHEEQMNKMETLGIERLPFEDTVCQMMDMVGPKQEGKIT
LSDLKACKMTNIFFDTFFNLDKFLDHEQRDPFANARDPNSEPTETSDWNRYAEIEYDNLV
ADEGNADMDDGNYEDDFEPEDEEEMIRDEMLRLADAAPPPQRTSGAVHSSEDIYDFSNTS
NLGY
>Cuni_T014962-R1  Name:"Similar to Fam122a Protein FAM122A (Mus musculus)" Cuni1009:135881-150455(+)
MINTLVTSPVDISPPATLKPATCVALRRMSSSNMNLHNTAASTSPPIRGTDRVARIKQEE
IHIADRERQREREIQSSLWISSNWEHISLDMSEPMEGQQRRPRSFSESLHIMTQSNILCG
SPSPTRAATKQCFSPSMQIPVKNTTFTPSPSPSPTRKNFLRSLSPIAVRTGALKRKLESD
GDRWEYISPPKKFNTGPSTPDRIMTCSHPLANSLAALGAHSPLSVISRGHSPHTSIGSHG
VAIVPTLMVSKQAFLFRPVQEAVSQASSTSSSTISLHHLQEHQQQHLEQSSLDHIDMVSD
SGNHNSTDIYMSDSEMRDHSDSVDKSSVDFNFKPISPDHV
>Cuni_T014966-R1  Name:"Similar to Blzf1 Golgin-45 (Rattus norvegicus)" Cuni1009:321723-335318(-)
MSQPKRDAKETILLRQAAPKYNFSGRKLPKESTKITGLEKTDFIAASSDTSVAQLPVKTD
STKAKPIAIVGASVQPAAATTVGNVKTSTSPLELITALPTVSTVTQYCSRSHSSRSDSQN
ISTERISPNIPVNSTDSALLRENLSAIDLQRSSVNACATLSERGLPATVPFTAVQRDSHY
SVTDKSTCESHCQHLENERDQLKKELEVQLQVNSELKRLLIASVGDDLSQRVERLCRDRA
QLSLDLGGFNKKMSEEYENLDKVSIQADMWRSKYLASRVMIEELGNARAFYALQCHDTQD
ALQKMLNERHELRTNLLEVHRILQQMKSAFDPLNAQRSSTLQSTNVLDLSRSCQQLAEAM
RFRLLPAHVAVKIDMETDETSWAESVTRAEQFAHEVLSRPAEPPGCLQSGSAKLLPVKAT
ADLQICRFHPNTRHDNLTYNCCAHCKGEINVI
>Cuni_T014965-R1  Name:"Protein of unknown function" Cuni1009:274107-275333(-)
MTREKDLIMTRNRSSGEGACTAYVHSRITLYHASKIDLRYCRSLHSCSSCKLGQVDDLCG
AIHFGVCSPVNFPSGRQRRVSGPSEHAVSYASTSPGSPSLDHDGSTIYHSSAHFSAPTNT
KDKLVPRTRSLAILREGHELAGMHLDHRPVAHQSGLMRLHPQRQVVVQGPSIRIGGGATG
VGQPGSDLIISSLGSAGGGRGGGVSISIKRGQTNISSSAGTAIKIQGQGHEIHIQGRGGQ
NIRVQPAVGHGGHVIRIHGQAHQDQLQYPSYSAVKPVAANSPTGVARSTATFTLPIPRSY
SSTTQFQPQKPTARVAPAPVPPQICTPPVLIPATTLSPSPVLSSSCPDSPTCSQETPPFP
VCSPVSSLSETPASSPSPSPSPPLASQIYTVQPPVSQVSVLLEISCMH
>Cuni_T014963-R1  Name:"Similar to CDC20 Cell division cycle protein 20 homolog (Homo sapiens)" Cuni1009:163024-183102(-)
MAHFKFAKDIDELVKMDGPLQTGPMMRWQRKAQETLVRVHREDEGVSSPLKSRNKTPMKT
VPSTTPGNGTKTPKTPGTKVIESQTNCPNGVRSSKKTKTPGNKTPGRQPDRFIPSRSTTD
LEFGHYAVMKRGEEGNPVSDETNSNVEYQEKLKDALDVKECKILSFRTQAPAANRSDINN
LQVLYSCSKSSVKQSSSSRYIPKEPERVLDAPDLLDDYYLNLLDWSPTNVLTVALGTAVF
LWNADNGTIMQLMELSTPNEYISSVAWVQEGAAVAVGLSNGVVQLIRSMTGHATRVGSLS
WNSYVLSSGSRTGAIHHHDVRIAQHQIATLEHHTQEVCGLRWSPDGRHLASGGNDNLVNI
WSNQFGSNAGSTPLYTFTDHQAAVKAMAWCPWQPYLLATGGGTADRHIRLWNVQSGTSVG
AYDTESQVCSVLWSQEHKELISGHGYALNHLRIWKYPAMTKVVDLVGHSSRILCMTMSPD
GTTVASAAADETIRLWKCFAVEKQTGKSQAKSEKKLTSGLNMCIR
>Cuni_T004557-R1  Name:"Protein of unknown function" Cuni101:181707-207876(-)
MPYRGEHSGSLSVTMKIASSDVGKVIGRGGKKIREFEQAGGGRIKISNAVDEDDMKSIEI
SGNDQDIETTRQMIEDYLRDFSIDDSSGKHGGFSGDRSHSKPSYNSRGEGYKGENQHKDS
ESNWRRNEDDDRDFSVGDRGRKRGGFSGSHNYSKPVYSSGGEGYNKELPRHQDNGDSWGR
CEDDDKVVSGGSNVGKSRGFGSSHGEEVYKSRNVYNSAHRNQDLDDKWGWHEEEEQADIT
SSSTGGGRGGFGGGRVYGSRGEGPSNRQHRNQGKPRDGDRRGRQEDYEKGSHGSGGDRLA
VDDSETIYVMSSEVGKMIGRGGNTIRQLEADSGCRIKVSRTCGSSDQSPIELIGSKSAVA
DAKRLIQETGVEIVNESSPGH
>Cuni_T004558-R1  Name:"Similar to MRGBP MRG/MORF4L-binding protein (Homo sapiens)" Cuni101:211697-216964(+)
MARDFSDFVWNPDMEVNLFHAMRGHKPVGVNKHFQMISIHDRLSSACKKITSDDVWNHLS
TLYDLQALNESEIVPFPNKNGCFDLLESDVSDLCEKTFPRTPYINNQPTDSTKTDSALNS
NITPSGATQGASKSTKAGKLEPKALLQTPKTETKTETKPSTSKAESRANTPSGREPKTTP
SNILKASLQAATPNAFEPSPKRTKRTRNVPSANASPATPTEPPTKRRR
>Cuni_T004564-R1  Name:"Similar to HMGXB4 HMG domain-containing protein 4 (Homo sapiens)" Cuni101:498154-528108(+)
MSKRDFEFEDMRKDDQDDGGASARSGRVRKKSAKVLEMEEFEQVEKTQLVTKKGKTPKIV
GKMPTEQDSPFSDKTPPVKKMKITKPPVVGALSATLDLTPLSSKVVKAVPAKSELSAHQT
KPVQQFVSIQTSGILTRALPGDLTLSPTDLMTTTLKPEYETDLSIMSDLGLQQQILQHSP
VRSEDQKSVIKYLLSSPSAGSKPSVSTTVFSRTEPSPVLISETPAAAKKPTKKPPKSQDA
GAVKMPKSKKVKADDMTGVEQPGAGLKIKIFSSSDPSTAQVTLSTHTEQTSPAKLKKQPK
KIKQIETEHDFLMDTVDVLGLSKVNKDELADTSVKKTKKVSKKKEKLIQDAISAAQQVPN
LAALVASQTLLPSQLQEHLVSQSSLFTPGQKPFKPQKKKMKTVSPLSGSASSSDDPNDSL
GKSDLSFGDDGEESHLVIAETERKKKKQFSKKKVLLHKDKSESDSPKGDKGDKKLSKRAP
TAYMLFCNTHRAAIVNENPGIEFAAISRRLGEMWQNLSNKQKLQWRRKAQRRRKKGSNLI
STGKAGRESGSLTHTPVSSIQSHQSPGLKLSAMMQKAQRSSPEDTPQSPTKNFSIEPIDV
AAHLKLLGESLSIIGMRLQEHKGMIAVQGSLSVLLDSLLCACGPLLCLTQQVPGMDGCSP
LVHAQTLDSVAYVMPGL
>Cuni_T004560-R1  Name:"Protein of unknown function" Cuni101:281902-290357(+)
TLKYCDRHYMFTTECSPWIDVNANECNNTTRLRDIGFWKTDQLNEMLKSVKELRDQPNSI
VLLSVGLHFQFNLQVVENKVLNPLLLSLANSSWPKVIWLSAPSAGLMKSPGYKYQQKENG
IQYNLKANELMRRKGIHILDFFNMTEPVMSFDGTHHG
>Cuni_T004563-R1  Name:"Protein of unknown function" Cuni101:454866-479723(+)
MIFQYKKRKWIYIVVIFLPAAVFMLLSINSLGGKMNIEMMQSLFSGQWNEMKPSCINVLD
NMVLGSWEKDKLKEAEMAAVVNFHKKIRAYHGINVNLQHKDNICGNVMHGATNRGITQFR
ALCDPNGSTPCCFENKCVFKTVEQCRCKNCFDLRQKLHAELSTWIPAEPTCKITMFAGEE
DSCKVMKDMTIYFIGDSFMRQLFIAVLSLMRKNKPYGPFINGTPTDTLKYCDRHYMLTTE
CSPWIGVNADECKNTTRLREIGFWKTDQVSEMLKSVKELQDQPNSIVLLSVGLHFQFNLQ
VVENKVLNPLLLSLANSSWPKVIWLSAPSAGLMKSPGYKYQQKENGIQYNIKANELMRRK
GIPVLDFFNMTEPVMSFDGTHHGAGVNDLKVQVLLNYLLEIKTST
>Cuni_T004554-R1  Name:"Similar to Polr1a DNA-directed RNA polymerase I subunit RPA1 (Mus musculus)" Cuni101:28079-88615(-)
MDSSYLRLQGADFRIYSKAEILQLSVKEIVNPQTFDTLQNAMIGGLHDPALGPSQRFDRC
ESCGQSDKNCPGHFGHIRLPVLVFNPLLFKTLVQLLKGTCLSCHRVNLSPLHIRLYAYQL
ELLQKGFLTQAQDLMERFLHSEKPENEALNEMIEFVKETIEGAKRDEKVLSKNVLTETQN
TMRSILSLFSSSKPTCRHCQTRNRTLKAEYNRTIVGVLIEERVPRKRLIQVKHTEMDIKD
MDAAPEEEVDMEEKVADEAKEAAQDDEEIDGEVQTELAHFLKSKHKRCIMSPNIARDHLR
KVWQEDKDFLQKLYPFLASVKECEFPVDIFFLDTVPVPPTRFRPLSMMKGRKFEHSQTAN
LSAVLRESLILQELIKKVEEPQKGTVKGLTVPDTNESLTAHMHKIMASWLRLQAKVNIVL
DSDLDNLSEDKFPGIRQMLEKKEGLLRMHMMGKRVNFAARSVISPDPYIATNEIGIPMVF
ASKLTYPQGVTPWNIHVLREMVINGPNKYPGASSVINPDGTVVYLNSSDVSQREAIARQL
LVNDNNVTGTKVVCRHLINGDYLLLNRQPTLHRPSMQAHKARVLPDIKTLRMNYSNCKAY
NADFDGDEMNAHFPQCELSRAEAAVLACTDYNYLVPKDGTPLAGLIQDHVVAGVTLSIRG
RFFSRQDYCSLVWNSLSDSRDKISMLPPAILKPYPLWSGKQIISTVLLNLIPKGVAAITL
RSKSKIPEKSWTRYQANYQNILPLNMVISDSDGMGESTVIISQGELLQGVLDKAHYGPSS
YSLVHCCYELYGGDVAGRLLTCLGRLFTSFLHNTGFSLGSGDILVQRKADRKRKSFIKKS
QHVGKAAVMKALGLNEAEANESDLLMELKQAQFEKGGVRMAEIDMCMKGETDKVQDDIAR
SIMPIRLEKGFPENSLQLMVQSGAKGSPVNCMQISCLLGQIELEGRRPPLMLSGKSLPSF
LPYDVSPKAGGFVTGRFLTGIRPQEYFFHCMAGREGLIDTAVKTSRSGYLQRCLVKHLEG
IMVNYDLTVRDSDGGIVQFYYGEDGLDPVRCPFLMPSQFPFLTENLLAVLSGNKENPWQT
VKQSKDVRHIWKKISKWRAQNSELGKWTNRDSSFLKFCQSEVAPSVSHSEEQTIVKEGKY
FGRSSAARKFCEAWESLIDENKEKMKKGMVCPEPVMSKYLPHSQPEVMSEHFRHLLNVYC
KKGFSKVVSQMSENLNPEAFKAAVNRKVVKSLAHPGEAVGLICAQSVGEPSTQMTLNTFH
FAGRGEMNVTLGIPRLREILMTASTNIKTPSMDIPILPVPQARPQAENLRRHLNRITLDQ
VLQHVKVKISTKRFNSENYRVFEVKFQFLHRREYADLTNLTPKMILAFIVKRFLLQVDMA
VKKENAVMEKTTLLSSGRLKRSANTEKEDSDEPKLADAKDEDVDTEPNDGDAAAVKEQQQ
QLDTQEYEGEEEERKAVVPE
>Cuni_T004553-R1  Name:"Similar to Polr1a DNA-directed RNA polymerase I subunit RPA1 (Rattus norvegicus)" Cuni101:13623-26192(-)
ALSHAFVEDFKLDERKHRWCTVTFYYIQSYLQLDIKLLLEKTIRNAVIHQVKGINRALVS
EEKEDGESVLHLKTEGVNILEMFKYPEILDLNKMYSNCIHTMAQTYGIEAANRVIIKEIQ
NVFGVYGIAVDYRHLSLLADYMTSRGQYDAFNRRDIMYNTSPLQKMTFETTMNFLLNACV
SGHKDDLHSPSSRLVMGKLVGVGTGCFEVLDVL
>Cuni_T004569-R1  Name:"Similar to Hcrtr2 Orexin receptor type 2 (Mus musculus)" Cuni101:720525-738775(-)
MFVNTTFASPETKSINVQGSSVIPEHTTAEPKNGSTPCWNEYCWDEFTYLDVLYQHVTPK
HYEWAFIFPYFLTFVIGLVGNGLVCFAVLRNQNMRTVTNVFIVNLAVGDCMVILMCLPPT
LIQDVTETWFLGTVCCKAVMFLQTTSVCVSVLTLSAIAVERWWAICYPLKFKSTLSRARK
IIVLIWVVSILTAVPEGVVAEAFPYHFPDRISSTLLTMCRPSWDALNQGIYQLVLAVLFY
VLPMILMAMTYTHIASVLWKHEIPGVVVGSKIAGRKPMLDGNRNAQDEQIVSRRKAARML
IAVVIVFGLCYMPVHLMNLLRYFEVVNYEGNNEALYIQSLVIHLLPYINSSVNPLIYNFM
S
>Cuni_T004568-R1  Name:"Similar to Anxa4 Annexin A4 (Mus musculus)" Cuni101:635227-662332(-)
GTIRHRHDFDAGAVAETLRKAMSGFGTDEKAIIHVLGNHTCNQRLEIAKAYKTAYGKDLI
DDLKSELTGDFEKVCVALLTPLRVLDARELHDAICGAGTDETTIIEVLCTKTNEEIKQIK
EAYKQEYGNDLEQDLCGDTSGYFRRLLVSLLAAGRESNEGDCDKDRAREDAKKFFEAGEA
RWGTEEAELNAILCLRSRSHLIEVFRQFKSLAGKSIEESIKNECSGSLQTGYLALVESIQ
DTPGFFAKCIRECVEGIGTSEDRLTRIIVTRSEIDMEEIEHAYKSKYGKKLIEEIEQECG
GDYKKMLIACIKLDD
>Cuni_T004561-R1  Name:"Protein of unknown function" Cuni101:322280-355499(+)
NVMHGAQNRGITQFRALCDPNGSTPCCFENKCVFKTVEQCRCKNCFDLRQKLHAELSTWI
PAEPTCKITIFAGEEDSCKVMKGMTIYFIGDSFMWQLYIAVLSLLRKNKPYGPFINGTPA
DTLKNCDRHYMLMPECSPWIGVNSNECNNTTRLREIGFWKADQVSEMLKSVKELQDQPNS
IVLLSVGLHFQFNLQVVENKVMNPLLLSLANSSWPKVIWLSAPSAGLMKSPGYKYQQQEN
GIQYNLKANDLMRRKGIPVLDFFNMTEPVMSFDGTHHG
>Cuni_T004559-R1  Name:"Protein of unknown function" Cuni101:262582-266981(+)
NVMHGATNRGITQFRALCDPNGSTPCCFENKCVFKAIEQCRCKNCYDLRQKLHAELYTWI
PAEPTCKITMFAGEEDSCKVMKDMTIYFIGDSFIRQLFIAVLSLLRKNKPYGPLINGTPA
>Cuni_T004556-R1  Name:"Similar to DDX43 Probable ATP-dependent RNA helicase DDX43 (Homo sapiens)" Cuni101:149790-179484(-)
MQKQYDKDRLLSLPKILKDFYKEEPHIKNMSHEEVRQIRKENNNIIVDAPDGESDCVPNP
IRTFEDAFRHYPLILEQIKQQNFVKPSPIQCQSWPVLLQGKDLIGIAQTGTGKTLAFLLP
ALIHIDSQPIPREQRVGPSALILSPTRELAQQIEMEINKINYRGIRSICVYGGGNRREQL
EKVKKGVEIVVATPGRLNDFMMNGKINVKHVTYLVMDEADRMLDLGFELEIKKVMLDIRP
DRQTVMTSATWPPEVQKLAEQYMTKPYKVFVGTLDLAAVHSVTQYVEFVDEKEKKSMLLD
FISNMTEDDKLIVFVGKKMVADDVSSDLAMNDVQCQCIHGDREQCDRETALEEFKSGAVR
ILVATDVASRGLDVKDITHVLNYDFPNHIEEYVHRIGRTGRAGRSGTSLTFMTRNDWKNA
QQLIDIMSEANQIIPDELVAMAERFSSFKQRNGDERKSSGFGGRGRGGGGGRGRRRNDDD
IGNFWI
>Cuni_T004567-R1  Name:"Similar to GPX1 Glutathione peroxidase (Schistosoma mansoni)" Cuni101:608446-622834(-)
MFFRLLSPSALLITGTQIVVQHSSRIFSRSFTTIMAEGDDNKWKEAKTIYEFNALDIDGN
DVSLEKYRGKVCIIVNVACKCGFTNKNYTQLQDFYTKYADKGLAILAFPSNQFAGQEPGS
NEEIKKFVNDTFGAKFDLFSKIEVNGKNAHPLFKFLKKEQKGTFGDFIKWNFTKFLINRE
GKPVSRYSPSTDPYVSYVLLLLG
>Cuni_T004566-R1  Name:"Similar to POLE4 DNA polymerase epsilon subunit 4 (Homo sapiens)" Cuni101:599245-603259(+)
MAGLEDMDDSLQLDVNEVVVPSAESEHSRVSQQESEAERRDAETEPQEKLIKLPLTRIRS
IMKTDPDVKIASQDAVITLAKAAELFIQGLAREAAMRTIREKRKIVLRKHLDDVFETKDN
YSFLEGVLESFED
>Cuni_T004565-R1  Name:"Protein of unknown function" Cuni101:565339-565859(+)
SWQGPYKVTKKISDVDYEILVKGKPKIFHINMLKPFKIRDELQPPRHINEHVASLALTIN
EQQEDTITDQIPTPSTTVESSWKDIKVNSEIPHEDRALLMKILQQFQDIFSDTPGSTSVI
KHHIRLTTEIPVKTKPYPIPLHYQKQVEAEISELEKCGIIRRSSFPTIHHRW
>Cuni_T004555-R1  Name:"Similar to ESCO1 N-acetyltransferase ESCO1 (Homo sapiens)" Cuni101:112220-131946(+)
MNMSTSAQVRRRLRNTPTKPRSESEVPFPKRARLAASNDSPVSSPIKSPLKPSAEENSGS
ILTASFYGLQKNKTVKENVPLAARKNNKSDSVKSSHMSGQLAKCMTESGKSTSERSNLDK
LMLGKIALSPVKQAFLQTCGLVEFRKVYRNEYKVLEEEMKRAHVRVTRLLSHSLNKTTEE
DLTEDSTDEEDTVEKNINSQTRAKLPSKSVAGICDSQPVNGNSILSPRRNQQRMTVKNKS
NEVKGKTSISDNNANHIGNGKLNSPIMNGESATPTGGRSQNINKQSTPKTSTPPSTERKF
FKTRSPLEDTKRGVAVLTKGFGLKFVTTKSKPAGSKKKQPAFSPRTMQSGSKPRKSNRKQ
QTNSVKTATPVSGFTFAPGFLSPEKVATEKSAEDRPEENDNEGFSLNKNNCSTYSSASQN
HTADKVIDNQSLNEVVDICLSENSGHQVEQHIDLSVRICSSVRLVNQNYTPNVGEEGQTP
QSSHKLFPIFERRNDQPASSNKKQSSALQLNDTSPVSMSSKLPKDSGSSQMIIDAGQKKF
GATQCPVCTMVYCQADPADEAAHMKFHRQHLEVLKFTGWKKERVVQEYPEDLGRVILVLP
DDPKYAKKKVEDVNQLMGKELGFSDTSTPIHPYHKVFLYVQDKQITGCCVAEPVQEGYRI
IPGDLDNSQESGQRPWCCSQVPEPVCVGISRLWVAASSRKTGVATKLVDCVRQWFSYGSL
IPKHKVAFSDPTPDGRRFAQKYTGTPTFLVYRYNYG
>Cuni_T004562-R1  Name:"Protein of unknown function" Cuni101:382757-411729(+)
MFKKRRWIYIVVIFLPAAVLMLLSINSLGVKMNIEMMQSLFSGQWNEMRPSCINVLDNMV
LGSWEKDKLKEAEMAAVVNFHKKIRAYHGINVSLQHKDNICGNVMHGATNRGITQFRALC
DPNGSTPCCFENKCVFKTVEQCRCKNCFDLRQKLHAELSTWIPAEPTCKITMFAGEEDSC
KVMKDMTIYFIGDSFIRQLYIAVLSLMRRNKPYGPFINGTPADTLKNCDKHYMLTTECSP
WIGVNANECNNTTRLKNIEFWNTKQVNEILKSVKELRHQPNSIVLLSVGLHFQFNLQVVE
NKVLNPLLLSLANSSWPKVIWLSAPSAGLMKSPGYKYQQKENGIQYNLKANELMRRKGIP
ILDFFNMTEPVMSFDGTHHGAGVNDLKAQVLLNYLLEIKTSA
>Cuni_T009904-R1  Name:"Protein of unknown function" Cuni1010:196313-196714(-)
MIPILHSEIMIPILHSEIMIPILHSDVMIPILHSDVMIPILHTEVVIPILHSEVMIPILH
SDVMIPILHSDVMILILLTEVMIPILHSEVMIPILHSDVMIPILHSDVMILILHTEVMIP
ILHFEHTMQNMIC
>Cuni_T009901-R1  Name:"Similar to DENND5A DENN domain-containing protein 5A (Homo sapiens)" Cuni1010:20412-31878(-)
MKKIQQMPDIHTDVGKTRALIRLALERKMLSVYLKQLLADTDLLRSLYKRYAFLRCEEER
EQFLCHLLSLNAVDFFCFTNTFPNSVVPYRVLIYPSSKLGCSTTSANVWLSVAGQLGETG
EMEVAKSLLELNFEHKNLGVLTTLRIGHDNSGMMPRWLVEYVLVRNELTGHTYRFNCGRW
LGPRSG
>Cuni_T009909-R1  Name:"Similar to Mphosph8 M-phase phosphoprotein 8 (Rattus norvegicus)" Cuni1010:360686-384465(-)
MGEGDLELDRSDHESQDSDSKHSYQHEKDSFSKKKTPTEPDNKYYEVEAILDGPKKRREH
LFKVCYKVRWKGYGPESDTWQPIADLVNVQDMIDDYKKEKDNQRHDKFKKTGTDSMVNKR
SRISSSSSSPEGHNAGRKHFDPVYGTVKDKFWKDLELGHQNHSPQFNGDMYSNVKGCRRA
AHTEALASIHKQRRRESKSLHTSRSPLRVLRGDHFSKSRSSSPVSSKHGKSSRRSESPKM
SRVGRPRKRSTDPLFASESTSAKRSRRSREANSGNIFFECKQPSVISSVTSETVAIVTTS
TPLTPPVVSNTSAAPLLSASSVVSLDGPVSSSVVTAWSRSSTDSTCLSMVNVGASSCDAI
AGASFDTCGGASQGSLPDDSQIHKALSHMRSALDTQSEASGAVERSYDAECLWNGACNRS
DCKSNRRRNMKNGQRKLGGVIPTDGSDSDGEPNVGNENTAMEDENNDGDSALVVNEDQAA
VEEDNRVYSSEGEEMEDDCLAVEHTQNISSAPSASGTKSSLGLMKTSTSGAKSSHSVIST
SYQSRSSSRQDDSPSPLPVSTVSRKDHKSLDYPSSGHGSRNKSSSQSHSSARDRRLLYSS
CHTDSSDSSFDDTASSGPSLSREAVSDSFCRIARLSDVDTSAVPSTSGSAAPGSWSLQRS
LEGCSSQGRKSHVEAERPGLFSENNGAFIFLEQDSGDMSTREQYEEGVFSQESVSVTPSS
PGKENFGSSGLKSKLKVTKGADVPSTHSGGRAGSLVRSHPRQTRLEDLEASASRPRSSEV
SQPQEKMPSPNSRDSELNERIVTLTCDELEDFVEQNITVEKDIGFISNADLLQAVNLSKA
EVVKRAVKQIRSNEHKLDLEQADNTGTTLLMRAVQRGALAIVEMLLENGANVNAQQTNGT
TALMIAADTNGTCLVALLLKYGANSSLYTVNSDQAETALMK
>Cuni_T009908-R1  Name:"Similar to SF3A3 Splicing factor 3A subunit 3 (Homo sapiens)" Cuni1010:315701-345110(+)
MESILEQQRRCHEERERLMEAMTSEMLAQKKTMREQINSDHRLKILHDRYAEVSRELKEL
YEDKDGVRKEEIQTLAGPNEYIEFKKRLIAIENFYRKHPNEVSIPMSIEFDELARQRENP
TEEAQNMVEFSDEEGYGKYLDLHMCYVHFLNLKGIEKIDYISYLSTFDHLYDIPKDRKNA
AYRDYLVFLLDYLGEYISKIKPLTDLPEEMEQVQAEFEKVWAEGNFPGWPKETSGALTHS
GAHLDLSAFSSWEELASLGLDRLKSALMALGVKCGGTLEERAQRLFSTKGKTLDELDPAL
FAKSKPGKTTKVGKTKDSEKQKEIAMLEAQVYRLSEMLSEQRAATRDNVQRKQAQTGEER
EESDEEKFEESDSDEDADDTPYNPKDLPLGWDGKPIPYWLYKLHGLNLTYTCEICGNHPY
RGPKAFQRHFAESRHALGMRCLGIPNTAHFANVTSIEDALALWTRIKSGKEAERWKADTE
EEYEDSQGNIINKKMYTLLKKEGIL
>Cuni_T009900-R1  Name:"Similar to DENND5B DENN domain-containing protein 5B (Homo sapiens)" Cuni1010:8620-20377(-)
MHHTIDTEDEVVVTSPPKTCSPKSPRKAHSTNIGLAEIQENLGQAVNNLVKHFYKPEKER
GNITYLLCGDKGLVHCMEQVFQFGFRSSRLFRNKIFIWDYMERLKAFFENALMGNTPCQL
SEVCKAGYWLFCDLVGKINTASDSVGKDGKFQVFICVGIKKRCLHRWLPLMANTTVTAQM
YEENSFLRIPSHTNFVMHILDSLTEFDIPLEASLLRGIDIDI
>Cuni_T009903-R1  Name:"Similar to NR1D2 Nuclear receptor subfamily 1 group D member 2 (Homo sapiens)" Cuni1010:108302-115610(-)
SVLSLLPSCEYKQPRFHQKSHFYHQDQITTMAELMKLIDTDGAFKSALMQVICCFFLIHN
HHHHVLSATSSPPCNWIFAKCHYQHITGVQENEQADRLAVTGAIVDAHMNTTINTFANVE
AANERIKRETADMPDMSSLSINSTNLWQHFMGAMLPEITKVIQFCTKLPGFAEIDQEDKI
KLIKQGCFEVMVARFCILIDHVKEEMLDPTLQVKAPRNMVQSMPMGPFLDQFFNVANQFN
PLGLNDGEIGLFTAILLISPERQSLKNQAAVSALQQLFIQSLYLKLKESHQDAEQTLTSL
INLVPVFHKINEDHLKFLKMIKMKSPADFEKKFPALHKELFDTC
>Cuni_T009907-R1  Name:"Similar to Fdx2 Adrenodoxin-like protein 2, mitochondrial (Drosophila melanogaster)" Cuni1010:296420-306911(+)
MAAIRLAFTPLLPSLVRQVSRSPILSQMSWSKLLVCSSLMRENRFCSSVPKPQHQKVKVI
FLLSDGRRQEVNAKVGDNLLDVITENDIDIDGFGACEGTLACSTCHLIFKQEDYDKIPDK
PTDEELDMLDLAYGLTDTSRLGCQVIVTKDMDGLEISVPKGVADARSPQS
>Cuni_T009905-R1  Name:"Similar to Prdm13 PR domain zinc finger protein 13 (Mus musculus)" Cuni1010:232372-235719(+)
LCWRNDRLESSDGDGLPQSWLQLMRCARDRHEQNLELVRSDDGLFVCTIREILQGEELLI
WYRETLAREVGVPILTPCHIRGHQKYVCTGCQAVYTHPNTLKAHMFLQCRKSAVSSSTDE
EHLVPFHLLLQTLSQSSSVSAERDRKLLHSCRNQRLAIAASSRLLPGCSGCGLTDDKNTY
KSAFRSPSSARDIKKELGSDEGLMTPDSSTDQSSALNLSVKLTEACSSMDKVKDISLHAV
HQWDTITAQHMMAQALPVPVEFASLAGCYPVPPHLHAFGIQLMSSGQAALPPGHRYDTSF
GSSLCNSGEYSLISPHMDDVHDNIGFSLFKPQSSSGSSSVRQVRGNNPYSFSLPSDKEPL
DLLPQAYFANKSKKGHLCLCCGKLYSRKYGLKIHMRTHNGYKPLKCKICSRPFGDPSNLN
KHVRLHAQGETPYRCDFCGKVLVRRRDLERHVRSRHPMGCVAEDTTLGVCESSPDSSPVS
VESSENSMASKDPMYENS
>Cuni_T009906-R1  Name:"Similar to RSPH3 Radial spoke head protein 3 homolog (Homo sapiens)" Cuni1010:267871-278459(-)
DGPIQYGNIMYDRRVVRGNTYAQHTLPVSAQPDPLEIQRQQESRRRAIARKRARDQFRPK
SPEPVQGRKHIDVQTELYLEELSDRVEEADQECQTDAFLDRPPSPLFIPAKTGVDVASQI
YEGDLFDFDIEVKPILEVLVGKTVEQALLEVMEEEELANLRQQQRTYEELRNAELVEQQR
LEEQERRHREEKERRMKQQREILRKEKETAEKIAARAFAQSYLSDLVPSVFGTLADNGYF
YDPVERDVEQGFIPWLMEQVSTELNRSELGRLVLDGIIRDVVVRRINLFNTINQAEAEFE
GEPEAMKSMAEHLEMGV
>Cuni_T009902-R1  Name:"Similar to DENND5B DENN domain-containing protein 5B (Homo sapiens)" Cuni1010:31880-85069(-)
MAAQEKANRFVDYFVICGLDEASELEPDRLSGDHQQCPPLERPYKSRVLAHYPETVLWNP
FDENAVGMLCLPRGLSFRTQWDSRQPKFHSFIITREDGSRCYGSALVFYEEVTSKSVLDT
MQTLYVMHQANTAVTFSLDSPEPVKRILSERKEKQNSFDASRDKLYVSKCICLVTPQPFV
RSGQQFLQQLFEAAQKPNQLALTLESYVFNIIYDVPLPPCGRSMKFFGCFNPICVIRPGL
GELPLFDFSLYDMFMLLGVDGVVDIFKCVLLEHQVLLYSSEYQRLMLVAEGMNVLIFPFQ
WQLVYVPILPASMQHFLDAPVPFIMGLCKVSTVDKSSLVLPCEANMCFVDIDNKLMEYPE
DLPLFPYQTELKSELTQVLNKYQNLIGAEKMSRGYPPTPRRESGFKSVSSLKNDDTTTTN
TTSWPNSPKRKEILQQSEAWKKISSLAKKTGVWDSIEDIVLDDTSPVAKDKDISIPTDSD
GMSLSEINQLKFNSAVRDIFLNCFVHMFASYENFVINPSQDLESWMSNRETVHNFDKAAF
LSDQPVAHLPFLSAFIETQMFTTLMDNKIVSQWEEAEPGLRLFDTRIKELKDAAGGEPRI
ITYNPCCTFDEIDQFIEKRAKNINFIASKPHEIASHTSPSQYVGGVFPLLSKELLNSEPA
NSKSKYRENAKWRRMDRQLQHKEHLQKHFEGEQQECPVVEKKSLWAQYLRLRKPQVPDVS
QAGMAQMTQANWKFVETLLKECKTKTKKMLVEKMGQEAVELGHNDASITGVEENTLIASL
CDLMERIWSHGLQYKKGKSAVWSHLLSFQEIEEGNDTNKPVDPKMLTPDLSNVGSDPEKQ
QEKNHEKTHRRRGSQGRIELPVLRPMSEVTPQ
>Cuni_T011218-R1  Name:"Similar to Sod3 Extracellular superoxide dismutase [Cu-Zn] (Drosophila melanogaster)" Cuni1011:298999-319872(+)
KRGEERVAVCAVKPNDGSDQPVTGVVTFRQKHGQYITIEVHLEGFKSLPSTANDTEYLHG
FHVHATGNLTAGCDSTGGHYNPRNTNHGGPSDAVRHAGDFGNLRQSPDGRVDKTFTDPVA
TLFGSYSIIGRGLVVHSGEDDLGKGGNANSLINGNAGKRLGCCVIGSA
>Cuni_T011213-R1  Name:"Similar to GABBR2 Gamma-aminobutyric acid type B receptor subunit 2 (Homo sapiens)" Cuni1011:4866-47584(+)
MGNPSVVILFLFITSWLFLTSACPHMKNSFNMSQSNTDTRVILNIMGFFAMTGIYPAGMS
YLPASLLAIKHINNKMDILPGYKLKLNAHDTMCDESQGLEAFYKEVYNPNRTSIMTLGAT
CSHVTEATAQVSTLWNITQISYSSISPHLSNRDIFKTFFRVMTPEQNLTVGRIKIMQEFS
WKKVHIVYENFKLFSTLDEYMKQDLDRNQIDVISNEMFTTLKPRDTVLALKKNDARIIIL
NMYEAQARQIICAMYNLEGSQTWYKKLVWFLPYFYDRSWIYSQSSQDNCSTEQILEVLGN
YFSVGSPSYLKDENYRTILNMSASEFYQTYMNGNLYSNILGDIPEQFSSLYSQGAKTNLF
CIQRAPEAYDAMWVIALALNNTLTAMIQNKSSVCLEDFRYRNETFWKFLEAGMMKVSFNA
STGPFSFNANKERITDIEIWQYVNNNSTSHDGSLVVVGKCQFLEASSWDCRVFKDKVYWA
SGKVPVDGVQTQIRTLQVDPRIVSTVCGIASLGIVLSLGLLVFNTVHRDHRVIKMSSPRL
NNVILVGCILGYSNILVLDIQGEDTGIVCVVRTFTLVLSFSLTFGALFAKTWRVYEIFAA
GAKVLNTRMLRDSSLFLIVTILILVNCLTLVGWVVASPQKPSLVVISMTPATENNDVNYT
NVFQRCDSTYRRQFTWALVAIQGGVILLGTYLAIQTRKVTFPDLNDSKWIALCIYNVVVL
GPIGIVVVMVTEDKPEINYVLEAGMLILVTTMTQCLIFVPKMIAYKKHNRKHTQSLDITF
KLRNMDEILGIFTLEPNNLDRDTTGASKPKETSGSCEVSQQTDFSGIACNDTCPCALKDT
EINPQENSTCQKATNVENGKETNERTHMSVLFQRINSKHNTNLKPSGLNNGKLQACDYSL
DSVNIQRSRSDSSLDVDSASGIVPQGDEPKPPDVESSMGNDDDKVAVFWGNLTLQESNSF
SSKHEDSQRLVLDTIKVKAELKVSSKLGLQASWREWPGHLNNAQQICELLSRLKQVVEAG
QGEMKT
>Cuni_T011215-R1  Name:"Similar to Usp47 Ubiquitin carboxyl-terminal hydrolase 47 (Mus musculus)" Cuni1011:91308-144482(+)
WQQHDVQELCRVMFDALEQKWKNTCQANLINQLYQGKLKDYVKCLECGYESARIDAYLDI
PLVIRPFGSTEAYSSVKEAMEAFVQPEILDGTDQYFCERCDKKCNAHKGLKFVTFPYLLT
LQLKRFDFDYSTMHRIKLNDKMTFPEVLDLNMFITLPGQNKKSLEEDDVEVEKTASMSNG
QADSSDEGVDEGIEVENGCSAGSSSSDSSSISSDAAANNSRNSYYSGEKGPYVYELFSIM
IHSGSAAGGHYYAYIKSFKDCSWYSFNDQQVTKITYDDIRKTYGGSTFSRGFYSSAYTSS
TSAYMLMYRQIDKQLNADFMHPEDFPDSLKAEFQHQKDKEDAERRQREIDKSTCKIKLYC
FHPRDQHKMDTRLEVHKDKTLQEATEMARELFHLQSLVPLDCCRLVKYDEYQDSLEKSFE
GEENSTISVLLDGVKSNYSFDLLLETRKPSQTFQEYKPGGVTVKVYLVDINTGLIHLPVN
VRAYHVQTMAEFKNQLQQVLGYPSAKMRCILEKFPNDLRPLTDPQKTLKAEGFYKSNKVF
VEASGDEVENSLPYPETRLCHLLDQYQHTIRVTCYLPSQRAVEEYQASLKEVQTRSPLTG
EHPGPHLYSSRTLSSLPSPQINAGVSELSQLDEGISENDSAFYSGGTNSKHSLAGFEHGS
SFSISSTAVSDTRGVGMLSNLSHKAGGPAASFEEDLENGLDKSDTPRLISDCEESQSSGI
GEHSRRVRNHTPCSSRPHSSSHEHLTVDMAHLCHKLSSTGLTSSRSDPSIYHTCADHSDD
SLQCLGSGPSMGSQDTSTSAEFNFGGSGPDPDPILSSPEDGYGFEDDNENEKENEMAPVN
PRTLGSGRRSGIVIHDLDLAPINSQFHTLSYSAQFPIGNFQPEEDWDREIEIDQAQQSSH
SSFPPSSSLPHSSWSFPPDRENTTSHLYSSPAYENADNLEVDLSRAKYQPPPPPPPPPPP
PPPPPLKLNERSSSKKALVSSKQNNNEDEVEEEEEEQEVKRYFHAVLIETSETEERVLNV
SVDKRITLGAFKRQLEPYIGVVSNLFKVYRVYSNSQEFESVRLSDTLSFFEDGKFNIKLG
RALRSGEHRVKVYQLSVNDAEPSKFLIETIFAKGMTVLESKQMILEELKEQRGIEIPLDR
CRLRKKSWTNPGTVYLDSNVYDSEIPIYPNWEIFLEVLDGPEELKDSSHLAIYVRWWHPS
THKIEPFREVVLQHQSVEELKMKISELSGIPAENVEFAKGKGTFPCEASILEIHTDLEWN
PHVSTLNMWPLYICDDGHVIYFRDSREELVELSEDRKKEIQQKENRISRQNHRITCSPRK
ERALKIYTDEDNRISHPKTSLELD
>Cuni_T011216-R1  Name:"Similar to Mlxip MLX-interacting protein (Mus musculus)" Cuni1011:161728-185512(-)
MVPLIMSVSREDNPSSAFEEFGTHLSLYDDSFHFVEKPVPAASSSPLPAVEDSKGTLPPS
VFYPICKNAEDAAGQVKVKRKCGRPRNPIPRHKRESHINAEHRRRGKIQDGFRTLKGMVP
KYEQSSGRDSKADILFKAVDYCKLLQNDIKELGSTIEALREEKDAVSVDIKNYKTVVPDL
SLYDDSSVSLDEHYSDYVQCKSKEHWAFATFKVIMRPLFESYKLCVRGNSLAEFLQSVAD
WAANSLSLSNLRTGKFRCWILLSGDE
>Cuni_T011217-R1  Name:"Protein of unknown function" Cuni1011:249192-255743(-)
MMTYVLIVLLTTVVRYSLGCFPMLDVFQHSTRWMQITSMNSRRMVEVGEETDEIMIIETT
ETIGTEEVIKHREQLLCMMEYGEHRYLVRIDDDEEGSRYMCYQFTPLTEYIVRQGRTEEN
INRKRVNCIDDQYTEDEQVLIAYSAIQPQQCPLAGGYQLIMQQGMAVDRLCINSIKTYNP
YIHCQPMALNPYMRGRHLTHLRCVGQWEDNDFHSVLLQTRDNPHHFWCLHYKVVSWGKSG
GKNNDQEELVKVFLTIDGRCSSQTFGNEDVPRNTSMFGHLALYKPINDIKCTETVYVESC
KLDEDKCLESIECPKSCGRCLNQVESYNCTFPAETFGSWKVFNSDRNLEMTIDKDRIESS
SFGELMCLGVPEPRRQGYLYTVVQINAAPTCNYYYSCAEMFNPNPGVLTFQLRPAFRNSN
TGELVSCKESYQDSPVHVRPPEPEAGFTLINQQRLQRTSCNFLQSSKYRTKIPGCSIVVH
ECSGPCQIFNVTFDIPSCDNETQQIYNIENQHICHAKVDFYDGVYGIVTKGVTSGKFLCW
VFGNSQLFVPTAEDCNLDSMDRIYSDASADTRYDLLKAISLNPPQDNSAEAVILPVPSAL
MFSLLVTYMLEVAFVACYYR
>Cuni_T011214-R1  Name:"Similar to RPL10A 60S ribosomal protein L10a (Macaca fascicularis)" Cuni1011:66727-71158(-)
MHKINRDSLRESIDNILKYSTETKKRKFTESVELQIALKNYDPQKDKRFAGTIKLKHIPK
PKMKVCVLGDQVHCDQAKANDLPHMDIEALKKLNKDKKLVKKLAKRYDAFLASESLIRQI
PRVLGPGLNKAGKFPAPITHTDVLNAKVEETKATIKFQMKKVLCLAVCVGHVNMTSEELY
QNITLAINFLVSLLKKNWQNVRALYIKSTMGPAEKIF
>Cuni_T012680-R1  Name:"Similar to Chst11 Carbohydrate sulfotransferase 11 (Mus musculus)" Cuni1012:38026-43960(-)
MFIGRCLTICLLLLSVVLFCGLGLMFNTKTTADVANCPCLEITDRQLAKLSPDKDLNQES
LPGHVTSLSSGAHLAKWQKEQGNITATGPNKFQPNWWRSHTRRTCQKLGLNTSQNALTPS
MLASVLVDKNHMILYCQIAKVASTNLGKIFAILAGKFNGTDPNAIKSSDVHWVFNKLQTH
LDVFPKHVMQDMLKRYFKFTFVRDPFERLLSGYRNKFLQPSSSYFTYINKRLVLKYRKNS
TQTGGVTFPEFVSYLLDKERKVPMNRHWQPMYEICRPCETSYNFIGKINSLEEDVSHILE
INNLTGIIDISKLPKSYSPQKSDHYLGHYYSQVPRPLLLLLFQMYYADYAIL
>Cuni_T012681-R1  Name:"Protein of unknown function" Cuni1012:46490-46801(-)
MVLNVNQSTLFLLVRLNVSQPTLFLLARLNVNQSTLFLLVRLNVNQSTLFLLVRLNVNLS
TLFLLVWLNVNKSTLFLPVRLNVSQSTLFLLVRLNVNQSTLFLL
>Cuni_T012684-R1  Name:"Similar to Nep1 Neprilysin-1 (Drosophila melanogaster)" Cuni1012:185374-240801(+)
MTDSSPPGMDDSSNPAPHSVTFTDKTSSKSRVYTLISILATVFFVTTVIFVVLFAVYYTK
YVDETKVTKDNHEVSDKKVCYTPDCVIAAGMMANKMDFTVDPCEDFNQFACGRFLKEAAL
PIARNILSPISALADENKLIMKDIITEDIIPTQPQYLTNMKRMFRSCNNEAQIEKIGLDP
YLKDDRTFVDDWPTLNPSWNNASFKLNEVIARYERVYIEPIFSYYTHTDMTDSNKTAYIL
ILQIKEGILGLSTEDFSKPRNDSVIIAYEKYLAETAIALNANRTIAEQDARDVVDLEIEL
SKITFSAGDTQNSSEHYIPVLLGNLSGMFPELDIPGAIRAAFETANISLGDDERVINQNP
TYFGNISSVVRRFSSRALQNLFGFKYALSRVDRLTARMRQIRLPFDQAIGAEPEGPRWDV
CLNIVNKAFWKGMGRQFVDKVFSDTAKSYIEQMIYNVKAEFRKIVEEKTWMSNATKVHAI
EKLDAMSPKVGYPDRCFEKADIEEFYENYTMNEGHYYNNRVLINKLDNFRLMRALRTLED
KSQKWQATLYDANAYNDIQENEIVFPAGFLRSPIFSETFQNYMNYGTIGTIIGHEITHGF
ENNGYRFDAHGDIRDWWQPEELIIFMDKMQCIVDQNNNFRIYEINMTVNGTMTQGDSVSD
NGGVKQSFRAYKELVRNEGEQPRLPGLGLTQDQIFFLAWGQVWCEKATPYGYIQQITKGV
HPPGKFRIIGPLQNSPEFAKAYNCSLGSYMNPVKKCEVW
>Cuni_T012682-R1  Name:"Similar to Nep2 Neprilysin-2 (Drosophila melanogaster)" Cuni1012:117967-138019(+)
MCLAAAAAAVAAKGICNTPDCVIAAAMMAKKMNLSANPCEDFSEYACGRFIEETVLPEGR
TRVGTFSVLSDENKLIMKDIIVEDIKDTKPLYLTNMKKLYRSCTNEAQIEKIGLKPYLED
DRTFVDDWPTLNPSWTDDSFNLNEVIARYESVYIEPIFSYYASTDMMNSNQKVLYLSEGN
LGLSMEYFGKPRNDSVIMAYEKYLAETAIALDANRTIAEQDARDVVDLEIALSKIMVPRE
ERRDSRKQYNLVQLGNLSSLYPELNISGAIREAFATANLTLPDDERVINRFPTYIGNISS
VVQGISN
>Cuni_T012686-R1  Name:"Similar to nep-2 Neprilysin-2 (Caenorhabditis elegans)" Cuni1012:325407-328100(+)
PVPGASQICDTKECNLTAAHLIKNMNTSADPCEDFNEFACGRFIKESKFPPGRP
>Cuni_T012685-R1  Name:"Similar to Nep1 Neprilysin-1 (Drosophila melanogaster)" Cuni1012:251199-258927(+)
PVPGTCTLCDTMDCVLSAAHLINNMNTSADPCEDFNEFACGRYIKESQFPPGRSHISSAT
AVSDRNTILLRNIILEESSPSHPEYLRKMKKFYQSCVDEAQIEVVGLEPYFNDTEFTDDW
PTLNPNWTDANFNLNELIVRYMVEDVEPLFSITVSTDMNDSTTNVIEVSFVCLFARGSDS
GRRVVVNSSVYALSFSHFCFHFVYGIQF
>Cuni_T012683-R1  Name:"Similar to nep-11 Neprilysin-11 (Caenorhabditis elegans)" Cuni1012:144324-164247(+)
KYTGNMAESPRWEVCLDSSASVFWKGMGRRYVDKTFSQAAKLYMEGMIENLKSEFQKMIE
ENTWMSQDTKKEAYLKLAAINKKIGYPDTDFTEDDIDKFYENYTMSEDHYYNNRVLNNKL
SNLESILSLRKPVDKKEWSMAPYEVNAYYSRSVNEIAFPAGILQSPFFSQTFQDSMNYGA
IGVVIGHEITHGFDDQGSQYDAKGNLRNWWQATDRENFVKRTQCIVNQNANFRVDEINMT
LNGINTQGESVADNGGVKESF
>Cuni_T015029-R1  Name:"Similar to Sppl2b Signal peptide peptidase-like 2B (Mus musculus)" Cuni1013:231023-231823(-)
MSVILKLPFYLSIMLTYFFQVKLRSFILLLLCATLGIYWAIQRHSRYAWIIQDLLGATFS
IFFMHTLRLPNLKIIAILLILLLVYDVFFVFITPHFTHDGNSIMESVATGGKGHSKESLP
MVFLLPTLSDFPLRRCMDREFSLLGFGDVIIPGLLVSYNAVFDVKTGNKMVYFISSSLGY
FIGMIVCIISLIYMNSGQPALLYLVPGTLFTTLVVALIRKEFLALFFGLHKQKSEKAEPV
ESQGRDSEEGDAVNDCTDEEERNLIK
>Cuni_T015026-R1  Name:"Similar to axin1 Axin-1 (Xenopus laevis)" Cuni1013:40605-88817(-)
MATKVVDFLNESGGSNFTESAPRPPTYGEENELQSNGGNSTKSSNSHKSHGSNKSHSSTK
SVASAKGDHVHSPASTPRKSNLEGNRAADSMTGTVAPAKGKYEDGEAVAAPLGFEPEGSA
ANSPHSEGTPPHSKWAESLRCLLEDSEGVALFRDYMDHELPGGSEELQFWFACQGLKKTI
INSKELDHSITNIQKVIYKRYVRSDKVRSITKTVKRDIAEKVSNRNVIDPCIFDSAQEEV
EKSMQSTAYPSFLASHYYTEYLHADTDSPKSSPSSGSDSARPVSQTGLLPVVHEDKELKN
EDLHASFQVPVMNKGSSTGKRAPSSSSLRHAETVTGSAIYPLKRPYYPTHISYAPVSAQD
SELQSLSSDALTDDTMSVTDGSVDGGRISSKKHIKYAWKVLASENRETATGLNRSIVPRT
HHPPKDSQMAQNNPNQFSALLIEKLTRIVEERESTARMEEKIHKSEERSVTTFAKANTSA
SFMPLSTTMEEETAESILDQHCSRIWESSNHDTPSYSPPRPSSPPYRSPDRHKDLRSKAL
VHPPGLSPAAYAPRSSHKKREFVTYDIDDRSMLVSGTTETHRHIHYHHYHHHRDSLKKAH
VDYDTQTSGVSAWRTENLQNISSELPNPYYANRGRTHTRKNSSNVLKKTSDSCSNFDSGI
SVMDSVKTASMNWGHPASEKVMKWMMNTDIVQEVSATVQDMEKSSSTHRHSHRLNQSATS
TQQIKTCSRSKSAAVRSASVDRTGGSLSLWTGATPAVPGQQPSQDASLCLFATPNSIPPQ
SRTAAVAAASPLKSRSFTSVPPKDRMRTPLSGISLASTSHNRTLPPTRTVPSHLDSSSAN
QSFDIGLRASANTTSLMQNNTETIIGIYMGQEPIPYRHQLPGRAITLAQIKSLLTKKGPF
RYYFKRHSDEFGDGAGAVFEEISDNSTIVPLWQGKIVVKVEKMD
>Cuni_T015025-R1  Name:"Protein of unknown function" Cuni1013:2877-13254(-)
MSDWPAASENRKQKPAMKERDRAAGVTSEKGDSFRSCVVIPTGNLLTYEAGKRWNQPGSK
YFSSVPGLILGEPFDTRKPRKGRWGEIADSKIARDSECFDEAWDKMKISRIDREEIAMED
ARRDLQRRIDICLYGAPRVPEVKLDPCPVRRRE
>Cuni_T015028-R1  Name:"Similar to BCAN Brevican core protein (Bos taurus)" Cuni1013:201044-212607(+)
TIVQASSCPHHVTKVPHSYTAVHKHVCYLFVNSELYWREARDRCWDLGGEMLSIESQETM
DFIKKKLNSPELSWDREGIWLGASKKSGKWKWTNGRLVNYTNWAPGQPSNLLGLLSVEDC
SQMREDDGWKWHDIPCGSLRFHYNYICQFPLNKPGDVGGKVSSSAANQSEDNGNSSILAI
IIGISTSLLLIMGIIFLVLYYHQRQSKQKASEVPVHFTNNTYSRTPNGSVHRDGQALPVP
PSQQPFVSNEELYLDPQSNDKPSSSHMNSAPAKECKCVHQQSVVSSSICSSPGTDSELGA
CVGSDPEQEMKTPLMAANSIDCEAVGASCAACQSLHSCCVLNQGDYIDMKSQPQEKDQHR
HTKEEDDKHTYSNVDHRDTGNENLYEVLP
>Cuni_T015032-R1  Name:"Similar to PRDM8 PR domain zinc finger protein 8 (Homo sapiens)" Cuni1013:263357-272739(-)
QANMGVVTVNDIDYGQIFGPFPTHFTVTDPAYIIGMLTNDKQPDGIVVRVDAEERSDGIR
VVDWLPYVSPARDEEEQNMEAYLKEGGIYYRTLRIVKAGEELLVWYSKDFTKILGIPELQ
TNSKRDDEQFICSHCGEMFDFPYPLRAHLKFKCSFTTDDTTRDRISAQVRLNGDHHHHHR
RHDIGRHRKHIDGLQDKSQYMLNYMTNNNSMFTISAKRPLEENKDSKTQCKKFISDAGKP
KRDSVITHSIEELSKSHQGKSRSSYAHENGLESHSDSGSAFRKVEKPLNLSPDHRVSPPT
SSPCFVSMPVTMSPPDRNGSCQSAAVLALSAKLPVSQGMHTLKVHRTLHSSPISQPSTSS
MPPPIRSPIKSLPSAVPVTSIPHHNPAMAGSQIMSLYMPRIPMIPSPSPLGLPGGSLLTS
GTSRIPIPHSAFHDQIPQGLLEMCRAAIPTVGPLTESFAANIRNSETLAKQALFADRHIS
TLGFLKSTNPMVEKLLQCTNPTLLSSPINALNLSQNWCAKCNATFRMTSDLVYHMRSHHK
REFDPLKRRREEKLKCNICNETFRERHHLTRHMSSHA
>Cuni_T015031-R1  Name:"Similar to EXOSC5 Exosome complex component RRP46 (Homo sapiens)" Cuni1013:252738-255607(+)
MAAFTVVKKEDLEAQQKEESVQSLRCITSELGPLTQPDGSAVFTQGDTTALAAVYGPADV
KISKELIDRATVEVIYKPKVGLPRPVDRKLERIIKNTLEAAIMALNHPRSLISIVIQETE
SLGANLACCVNAACMALLDAAVSMNFMVAAVSAAVTDKGEIILDPVSRVEDEARAVLTFV
FDSVDKNIVTVITSGQFSQDEYKKCLYLTKQACDNVFSFYKDSLSKKLLKSA
>Cuni_T015030-R1  Name:"Similar to Pdrg1 p53 and DNA damage-regulated protein 1 (Mus musculus)" Cuni1013:244522-249012(-)
MSQTSATEASQLVEYLTEIECVAEDILTSRREIIDLDRQRNKTREAIRALQQVKEDEKTW
MCAGRMFLKMDKEKAVTILNKDYDELDKEIGLARANLRPKVNKLRDLEKKDELKGFDLCP
LTPEERKSVENLL
>Cuni_T015027-R1  Name:"Protein of unknown function" Cuni1013:143776-150164(-)
MPFLARRKFRNSINVVIIVVVVVVTFGAHAYVPVCYNIVRRSADAFRLEYSSLYKRHADS
FEAASSATKFLFAFLPLMASLLANILLLAYLKLHARNTKNLRMASKTDETFSRQNRQVTL
IVLVSSVSFTLFSLPANIHLLATSYTTQYGYNQKEHYLFMVIHESLLGLLTLGDIANFLS
YLILSSAFRSQLRSTLLTMIQLRSQRSALAVNQSTSFSSSCTVRTITRSSSAGTNATE
>Cuni_T016262-R1  Name:"Protein of unknown function" Cuni1014:268246-269901(-)
VNDMSAQVISVRNELLLSLDELENGQASPLNVDSHDDKQEAVAALAEYLHGAQYLKAIQI
LRKFRSQWPNDIFGMTFEDDTLTLLNIYCSNLAEKNQ
>Cuni_T016263-R1  Name:"Protein of unknown function" Cuni1014:327811-327996(-)
LDHSRALVYEHCKKLLQNLLLLASSQEQISSSTSRLLLSYRSSVADTLKVISEDRDAQLT
L
>Cuni_T016259-R1  Name:"Similar to Tim8 Mitochondrial import inner membrane translocase subunit Tim8 (Drosophila melanogaster)" Cuni1014:185669-188391(-)
MSSFDSLPSSKDDVDPEVASFLQMESQKAELQAQVHKLADVCWEQCIDRPRDKLDSKTET
CVSNCVERFIDTSLTIATRFQKLLQGAAANM
>Cuni_T016260-R1  Name:"Similar to AGA N(4)-(beta-N-acetylglucosaminyl)-L-asparaginase (Homo sapiens)" Cuni1014:230850-237364(+)
MNHTRVILLFFIIWSVSAKDTLLPVVINTWPFTNATASAWEVLQKGGSADDSLVVGCSTC
ERLQCDGSVGFGSNPDESGETTLDAMIMDGATFAVGAVGDLRRVKNAIGVARAVMKYSDH
TLLAGESATKFAVEMGFKEESLTTNKSQAMFNDWVKSNCQPNFRQNVKPDPKTSCGPYSP
VPSSFSK
>Cuni_T016257-R1  Name:"Similar to RECQL5 ATP-dependent DNA helicase Q5 (Homo sapiens)" Cuni1014:112500-150793(-)
MAPDFELIQKTLLEVFKHRDFRSTTQRDAVLSVIKGDGDTYISMPTGAGKSLCYQLPAVL
AKGITIVVSPLIALMQDQLSHLESLGIKADTINSRLSASERKLVVSDLLSKNPKLKLLYI
TPEQAATDNFRDLVKSLFSRGRLSYFVVDEAHCVSQWGHDFRPDYLKLGEFRRRIPGVPC
VALTATATAHVVTDIFKQLCLKEPVKQFKTGTFRSNLYYEVCLKDFLPDPYLDLVNFVLK
CLNVSLDEDDDPDWNEKGCGIVYCRTRDGCEEIASQLSRRGIPAKAYHAGLKGDKREETQ
TDWMEGRVAVIAATISFGMGVDKANVRFVAHWTMPKSMAGYYQESGRAGRDGCPSYCRLY
YSQGEKNIVAFLINKENNRTKKSAEMARLQAKAAEESFGALLAFCETAKCRHWSIASFFG
DEKPPCDRACDVCCHPKKVQMDLLNMQKGLFNTKMKSGLRGTMMVVDDEDDGDMYGGGRR
GAKRETDDYDLGGAGGGGGGSSDEGEYHKERQEATREKKERSSLIMNEFKKRKGAQKPTA
NKEEDEVEQPSPFCPLRDASSQRIPKLAIKTREHCLEMIEKSLYENFVAAFAEDSRRIAG
RDYEPRTCAINMEYHTFTSNKLAPMYKSSIMKIVSEIRKLSHSKSAHSCFRKTDESTDIA
RSANPEDVTQHQKSNAAVTNFSGFQRASQLVTPQTGSVASSVDDVSEAPSTSSPHRTKPD
DATSSAASSGFQTANTLLKLRQKSSNQDSVSLKPSSIKDSMHNSEHSSKSKHMNSTGGGY
VSLTVKVDGGSNKKNSSKNSAENLNMKCSSKDVTLADKKSEKQSCSLLIDLTNEDDEDLV
VDLTDDSCDIKPYPNRSPRRSGPSEASTGQKAKSTIKYFFEQQESKSRTGEQQTSSKITA
ASSGSVKEKAAKLEATQVLKASAQEQSKVNNGLTGIKANVAVEQSQKVQPDTMKRKISQE
RLDMLHTLDSYLPKKPRHGSDSGISSDNSCVSASSTAAPSFDKDDVRMRENQEMKHIAGT
VVKYLTPYYKAGYFTSKELFKAKAKVITQEVHAATKGLPTSGKEEAKRLIREHMEHDKQA
NSERS
>Cuni_T016261-R1  Name:"Similar to N(4)-(Beta-N-acetylglucosaminyl)-L-asparaginase (Fragment) (Spodoptera frugiperda)" Cuni1014:239618-247798(+)
RIGDSPIMGAGSYASNQAGGAAATGDGDIMMRFLPSFRAVIEMGRGLSPTEAAQLALDPI
RKFLPTFQRCTGASCHGFSSFSFSVASAQFQDVQVLEVPCSS
>Cuni_T016258-R1  Name:"Protein of unknown function" Cuni1014:158611-166026(+)
MRFKQTKPQHVKKKAENDDSQVSISKEARARTCNTSNEWENYDCVDGDVDLEKLKADSHC
SGLGSTLKQQNGHETVMDLGPMLEFYSNEDCSEPGAASENHLDDPPTPAVTENDVIIQGR
RPIFSEPEESIIATQLKQWKEQGMKYTRLDVVKMASEYAVHLGKRPQGRPLTVKWFRSFL
TRHPECYIRKSRKTKAERPEKQYFNQLDIILTTYNMKESPHCIFSLVELPLPMLKNGDVS
LAEDLSVNGGTVNGSKLHRKLTFLGKVPSSILFCGSAAGQALPPFLLFAGKTMEKSVLSG
LTPGAGGVACPAGRATSEVLVTFLREHFLSQAPGRAGDTLILLLDANFGRCLNQAVIDLG
SAFKVVFITAQTTVNPHLHPMAVGCCNTFQRELCYELQKPLYTSESASVSSASICEFLCR
LYHRNMSAENLHSTFRKAGIFPFNPSICRKRYGLATVRSGNSSKNAGLVSSVLNPLIRSS
GNNEDFEGSHMDDDGDLQ
>Cuni_T014208-R1  Name:"Similar to Ccdc88a Girdin (Mus musculus)" Cuni1015:180787-230676(+)
AMKVDVYEKEVLKYKEKLNELEFYKARTEELKEDNSILEETKAMLEDQLSSSRKRIETVV
ELESKLERYRQQMEELTVERESDRKKIEYLTEENARLEFEKKSSLNESSSLETELSVAMS
RMNNVGSSLSEQLSETSHTRILRLELENQRLAARLAEMKETALIQSAEVSLELEKENQRL
AKKVGYSSLQSGSCEASGQLVQLESELSAAREEKDRLKQTVETLREKSEQQVEALEKENE
QLSQALHQIRERIEKTNVILAQVKDLEKENRRLVETVTTKNSQLNKLEFDNRQLQRSCHQ
LQENIRRVQELEQEVQSLEKENADLHQKVATLQHTADRLEVVEQESSDLSIENHRLQKTV
ESLQKLAQRREQEEQDHISLKLEHQRLQRTLETLKSETDRAVELESEKNDLSKEIQQLQK
LLEGQKTQKLKQEQMEVEILNLSNENQRLRKSVELMSRQLQQLDKDNVDLETEKEKLNSE
LETLRVTAQHLEEKDKESSQLEAELLRLQKDKSALEKENKKLKQNLDAKGSSLEEVNAKV
LSLGQEVKTQKLAVENMKETCGKVKDLEKENKQLLQELNTDRRTLATLREDLVNEKIRSQ
ELSNELEQLTSDLENLGVDTAKLTVAEQAKDANRYKALETMIEETLQKSSEIKEKKILSL
ESRLEESKSRNLKLQEELRTAKREGELLKQRLEEESSEKVVLDSKKEEKDRDGKYAPSVA
TKEIFQLKDHLVELERKNATLLAETDNLRSNNQHLTDQCVKLETQLANVHSQHAVLQSHY
SNLQEQNAKLQVEYSTLQSQINSSLSQQDMLKHQLSRLETDHENLTHKYEGLQSTHQAFV
SDHESLQHLHQQLTSEYESLVAEYGSLKSLHKSLKVELKDLQDQLEVLLQGKDDVNKLRD
AMEKEKDQLKRTARLRESHHQLRSAYDKLSKDYSDVLASHKQVKTDYNTLQLKTTELQGD
LSEAKENLSVADMEFQKLENRMEAVYQINERIDNENQALLMQIKQLLNQNHELLMKALNS
KDHFAEEEKAYLEKLSELRRQKERLEEKIMEHYKNRISPKKKGFGALIARKARGIMSRAP
KRSKSRNNLSDVTDSSSQGFGSPDQTIDRQHTTDKPTENCCSCTGAIPPESPEVTRRTKT
LAKSYTVLDFAFVDIEQIQLRGS
>Cuni_T014206-R1  Name:"Similar to CPO Carboxypeptidase O (Homo sapiens)" Cuni1015:44111-59521(+)
MNSDIKYRILIAWCTFVLIIFQQNVRSEKITFQKENYTPDYSFYHNVTSIVSHMTKIVNK
YGKYINLKDEFRSKAGHSQLVIRISNFTSEKSGRDKVQILFAFGEHAREFFPVESMFYFL
KNLTRGLDELHQGSLSGAYSAWVVNNFDIYIIGMTNPDGRYYLEESGNYCWRGTGSGIDL
NRNFDWNFAGPGSSKDSHDEEFRGPRPFSEPETGVFIKLAAKISFDAFLSFHSGIRQIYL
PFADTKSKQQNRLPENIDHMLKLARRMSHSSPSRPFQFGLAHRLIDYSADGTSFDYMAGV
ASVPFSLAVEMWGHENHTGSSCFDEFNPRSEHLQEEVALVHPLYVEMLSYLLTWKTRKSA
ARNRASSTLIRVRKDNSLNSEHQQDVLYASQTSREISRSASFESQIIYVIFALVVTGCVI
LGVRHTCQLMRKKRIVSLKSLSLTFSLCKHL
>Cuni_T014205-R1  Name:"Similar to HAAO 3-hydroxyanthranilate 3,4-dioxygenase (Homo sapiens)" Cuni1015:14175-38171(-)
MSTTYPVLYNLDTWIEENQQFFLPPVCNKMMHNDGQLKVFFVGGPNLRKDYHIEEGEELF
YMLRGDMCLKVIEHGKHKDVPIKQGEIFLLPARIPHSPQRQVNTIGLVLERERAPDERDG
LRYFQVKDGVPTTDSLYEEWFYCKDLGTELAPVIRRFIASEQCKTGQPVPGTIPEKPPVT
IDGETSLQSPFNLHNWIKDHRAEIDSAGSLQLFGDNRQFYVAIYGKGENTGGSDRAETWI
WQLEGESVITVAGNEYRLHKNDSILIQAGEKYKAVGLEDSISLVCCQDPARKIPWKNCNA

>Cuni_T014207-R1  Name:"Similar to Ccdc88c Protein Daple (Mus musculus)" Cuni1015:95618-143978(+)
MADAEKLYMQSPLVRWVETFKASDGHPLEYKDLYEGVFLNDVMQQIDPRLAYDKVNRSVE
DVAARLHNWDILVKNIQGYYR
>Cuni_T012749-R1  Name:"Similar to CXE17 Probable carboxylesterase 17 (Arabidopsis thaliana)" Cuni1016:75821-79381(+)
MAGPWDAFSSKYKVHQESHDCLAHLIKHGARPFSTYQITEAREAFHNICLTAAGTVNFDG
QTQELKIPSPYSKDGIAASVYKPNKLAATPAILIYFHGGGLCMFERKYFESSLQLLAQEA
GCIIVNSDYRWLPDNKGYAPFDDGVVVTKWVLENKKSVGGQPGSKVGVGGDSSGGQIAIS
VTYDVQGLDFLEFKSIPVLPHPDLQYFTKLVEQAIPNQATDPRVCPLARTNLKNLPPTLV
LVAQLDPERDGGLEFAEKAKAAGANVTSYVIEGVPHIFFGMDGIYKTKCAEARSYMVPFI
KQFQKAT
>Cuni_T012758-R1  Name:"Protein of unknown function" Cuni1016:272494-286181(-)
MKIFLRNVNCLHIFSMSRNCCLLMLFLMATTSDLVQGQLPYSSNPPAYEIPPLGVIHEYQ
RQLEDDIYAVERKAESLAHRECVSGEENFLFCPLTLNIFDFTTCIINPQTAQGADALTRG
IKFPSSAFSSTPSVAVGISGIGTGPTCGVKVEATDVYASGFNIQITGGFLLYPFSLKVTW
IACPTRQPLNTTVRDFTPKKGVPPPPYFPISYGPVSSNRAGKNTSYNNNNLIYADNQPRY
DGSKSGYEESSLPVDEDSEDEETTSSKSSSFTSEATASTTATSSTYKTSTTKHEGGESKT
KTTTPGDDSAGSADSTTEA
>Cuni_T012757-R1  Name:"Protein of unknown function" Cuni1016:228242-264772(-)
MAAPETPTEIALPSAEIEELPFTTTLPVHVQRLMYGGKVIKSRSQCRGDPQGMLTFTDLK
ESLKELPKPLPWLKGKSETHISKRDEKEERLKENTPKLRLSASKFVSASPSREHPISKRY
KMDKSLQFEKMISQNINRKIAFVPLPLDTRGMPAYVVSRLETACRSARYELPMNKSHLEK
MTPLEYLTTYTRLYKEQRDRYMRIYKKFKQKHNDYVEYNNLYPALNSMFGGFLSKMNFEI
LSVALFLDDSMTFDPNPFIAICTFTDRLYWTAYIEGSNTFNYWAPNRSAIEVIDFLNLKW
KLEGLKISKELQCLLQSLA
>Cuni_T012748-R1  Name:"Similar to nlhH Carboxylesterase NlhH (Mycobacterium tuberculosis (strain ATCC 25618 / H37Rv))" Cuni1016:54634-59638(+)
MADPWEEFAGNYPIHEESYALTNIIKENDIKHFSDYDIEEANRIFSSVIKASAGEVPFDG
QVQEMFIPSPEVANGIPVSIYKPSNCVQTPAILIYLHGGGLILFDRKCFEPTLQLIAMEA
GCIVVNVEYRLLPNQVNGHAPFDDAKVVASWVLENKQKVGGSPESKVGIGGDSAGGQISA
SVANDLHGLDFQILIYPNVDTGPTQPSVDEFANVPLLSKADIQWFIRHMAKALPDHLTDP
RVNVVTRTDLTSAPSALVLLAQLDTIRDSGMMYAEKLRAAGVKVRIVVIEGVPHCFFMCP
GVFKTKCQEAYGHIANFIKDFQ
>Cuni_T012752-R1  Name:"Protein of unknown function" Cuni1016:118765-121401(-)
MYARRMRRERNHGFICFKILTSAVEIVCDFACLSHVYNINDYSHEWAHENKLPAMTCCTV
LSLILSAFKIIMSFCEACGDDSEDYGFWSDTSLLLSLLLGDVPKSCVNLWVVSEHRKYVN
RFHIFKAIYVILFKCPKRHAALDHHFHFRGSDECVKPAYVIGTIVEACIAILTGLVCMFT
S
>Cuni_T012747-R1  Name:"Similar to nlhH Carboxylesterase NlhH (Mycobacterium tuberculosis (strain ATCC 25618 / H37Rv))" Cuni1016:32861-33898(-)
MTGQDPWAPFEGKYKIHEESREFGRLLIASGFKSLSELGVEKAKQVVSTQFVALSGEVDF
DGEEKEIIIPSPYTLEGIPVSVYKPTSAPEVPAIMVYFHGGGWVLGSRKTHEVTLKIIAR
DSGAIVVNVEYRLMPIPDEPYAPLDDAEVVTKWLMENKEAVGGKPNSKFGVGGDSSGGQL
AIGTTNEVSGLDFQILVYPLADTSLSQDTVREFKQVPGLDENDIKFYLHHGYSQIPDLLT
NPRVNGMARTNTATSPPALIILAELDLLRGGGIDYAEKLRAAGVKVQLEVIRGVPHAFFT
LRKIFETTTAQAYDYIVKFLKQFQKCSSDGKPDHTVFCCCRFFLR
>Cuni_T012755-R1  Name:"Protein of unknown function" Cuni1016:194653-195480(+)
MSSLIICSNNSVPYQGYNTANDDKHIEEFIPEDIYVTTLARRLVEICIDLTVCFLLALLG
TITNILTIIVFAKQKFKDSVAVSMTAISIWDLVKCSGFALQRLSGPVSLWDQAKAESWAN
ISMVVFTYYTCFATYVSIVLAAYVAVERSLCVSIPFKIKWLITRKSSFIICVVISFVVFG
WFSVMFCVFDIAWVYSNHYNRTIAIYVNSEFFYHYKQPVFLFYNLSGIILPVVCFVIIVI
STCVVIYHLRKSSRFRAGSAQSHKSESQSRKSKLC
>Cuni_T012746-R1  Name:"Similar to lipI Esterase LipI (Mycobacterium tuberculosis (strain ATCC 25618 / H37Rv))" Cuni1016:11982-12956(-)
MAAQDPWSPFEGKYKIHEESREFARLLISRGSKPYSELGVKKSRLQAESVCSLVAGAIDF
DGEETEIIVPSPYTKQGIPVSIYKPASRPEVPSILIYFHGGGMVICSRKTHETTLKIIAR
DSGAIVLNVEYRLLPDPDAVYAPFEDAEVVTRWVLENKEAVGGKPNSKVGVGGDSAGGQL
AIGVTNEVPGLDFQILIYPLADTSLSQDTVREFKQVVGLNEGALKFFFDNAYNHIPDLLT
NPRVNGLARTNTASSPPALIILAELDPLTGSGIEYAEKLRAAGVKVQLEIIQGVPHGFFG
MRKVYKTTTAQAYDYIVKFLNQFQ
>Cuni_T012754-R1  Name:"Protein of unknown function" Cuni1016:189382-189822(-)
SIILTVLLYGAQCWRMTKKDAHKLSTFHHTCLRTIIKIFWPDKISNTKLLQVTNQKTLDS
MITKRRWKGLGHVIRMNPDIPAKTALTLTPEGKRKQGRPKTTWRRTMKSDLSAASLTWKT
SLKIAQDRKAWKVLSEASCATRHNEN
>Cuni_T012753-R1  Name:"Protein of unknown function" Cuni1016:136679-139483(-)
MYNMNARPMTKRRWSFIKVKIGMSVVEMICDIVCIVYIYDGKNDSHRWAVENEQLSWLAN
CTSASLLFCTFKIIMSCAEACGYDNEVTRCLSDMSLLMSLWAGDVPKSCVNLLILKGNTK
KYVNVFHFLKAVFVILFKSAKRGEVSDHHFHECCNCISPAYILGWIVEVVVAVWIVCLCI
SSRF
>Cuni_T012756-R1  Name:"Protein of unknown function" Cuni1016:207179-222879(+)
MQGYSDSATEEDVFSQMEEPGESRLAKHIQDLMFGPKGRRKFPKHEYKPTGCIDYEILGD
AVSSAHKPPPWLTDQVKPAGGPSEKKAKGSVFRRPRQVAEEKVKERRDRYSEYNRIITSN
PYKKIAFNNSQMLRDMIPQWCQDRLRTACRSARFELPFDKTILENITPLQFLARYTRLYR
EQRRRYSLIFQKHKSKLNDYIEYQNLFPALNTMFGMYLSKENFDILCTALFIDRQTSLDE
TTFVGVCTFADRLFWTSYLEHLERDTFTFLGPNRSVLEYADFENLKRKIDGLQLSREMYY
LLYSLA
>Cuni_T012745-R1  Name:"Similar to KCNJ5 G protein-activated inward rectifier potassium channel 4 (Sus scrofa)" Cuni1016:724-7970(+)
VTLGFLMETFMLGLIFVKIARPKYRANTILFSRHAVVNQENGKLVLQVRVGDLRQSHLVD
TSIAGMLIRRHSTEEGAYYPLYQFNCEFSANGMADRVFLLWPIILTHVIDKGSPFYDIRP
ADLSSEKFEIVLYLSGTVESTGEMCQARTSYLPKEILWGHRFERIEEYDIGHRRWHIDFA
GFNDVVYTQNIRHSAKDLDAFREVEEERANKTSKANSLEAVATSSSSSTTTAASSSLHCD
LSPTASPYDNTDAPLISKTKKKGRKGPKH
>Cuni_T012751-R1  Name:"Protein of unknown function" Cuni1016:106152-107471(-)
MKSKGCKIAIHIFALFVSILDFISDWLFYENARALEQGLVYGPVEPTQVTAILVFCIIGT
VLFIAEIIAFVIELRDLLGENDDGGKDLYQEILSAVITWCEDIPQLIISVVILLCREEAV
SIFQLVKAALSIVGIVVDIVLTFKRYWRQRHFHRPFRIVRSILAPGMLVLLGLSIAVFVL
TQTEAKDNGGVAFRQPASVIDDHLSDNKYFDGVNVFLRDSGLPESMKDDKKSDKWMRLFS
IYELKDSNQMSVKLTHSHCGCGDFDIGIWFKTAKTNTEDWTLFGCYSVESETEIINPQPN
STCLNNMDSGSSYDVVYIDFRFENPGTNWFYKTMIFGQIYFNCKIYINGTCRSCHFVSSS
TEEQQQDLQFLSYFRVNNPIAVNNNTYFYSGNGNEARYFNSGLGDITSVDEVWKTGWSKC
ASTGGISPVLDSQMKIECN
>Cuni_T012750-R1  Name:"Protein of unknown function" Cuni1016:91405-96384(-)
MPALSLFTNISFRYLGNDPHVDKQIEEFIPEDIFVTSSDRRIAEICIELTLCFLMSLVGM
VTNALVIVVFAKQKFKDSIAISMTAIAMWDFVKCVGCALQRFSGPISLWNPADAESWSNI
SIVVFTLYTCFATYVSIVLAAYVAVERCVCVSLPLKAKWLITRKSSFIICFVVSLVVFGW
FSVMFCVYDIKWVYSFHYNRTIAIYINNDFFHRNKQPVFLFYNLSGVILPVVCFAIIVLC
TGVIIYHLRKSSKFRTGSTQLQSQNSEKQSRNQISSRDRQVVKMLLVIIGVYVVCLSPRI
AVYMAKYFVYDFYFLRRLHNLFMIFFYVVITFDLINAVINLFIFLVMSSSFRSTFLEIFP
ICNRLIHANNENTSTENRSKKGK
>Cuni_T007130-R1  Name:"Similar to Smg5 Protein SMG5 (Mus musculus)" Cuni1017:157405-175660(+)
QMDILAELEELDNEQKASSAIERQEREQQKLQQVLEVVQNEGLLPTVKVMCDWMRSQASI
ISVCAQSSYNLWQRLSVLLNFLPHENDIVQHSMCWVPELQVIVKQTQFPDWTQVFPLTED
IELCQLPPLADIHSQIDFTTRHRAQLSDIQETFLRVCCLRHFGYFLTSIESIDFTYQTDT
SMFFGPSSSSDLTLNNCSQDSMERMKDTENRRNQLMRDMAQLRLQAEVNELEGSLKTSEH
WVFPPYVVADDTALCNYLAKVKELTQTARCIVVIPMAVVDSLDMQKKDSANAREVIRWLE
AQLRRGNRYIRAQRSKETLSLNQYGVHKKKNRDVWYILELLGCARYLAQQTGSFTGHSVV
AIVTGRQKLMATPLPPVIQQIKSQAEQEGVTIETMVDFGNQWKSVLQQTGQG
>Cuni_T007127-R1  Name:"Protein of unknown function" Cuni1017:87245-87547(+)
MMVYMMIGLTALLFWLWEWLFEDVPRSRCLASQCAGLCQRFSEERKKKKTTIGIFEQRMA
LHQRSTENIGSFHKTLVEVKQGYQENDKLILFGHPCTDQK
>Cuni_T007134-R1  Name:"Similar to Aldh1a2 Retinal dehydrogenase 2 (Rattus norvegicus)" Cuni1017:436423-457973(+)
MADLTPIRDLEVKYTQLFINNEFVNSASGKTFPTINPATGEKIADVQEADKADVDRAVEA
AKAAFALGSPYRKLNASTRGQLLNKVADLIERDISYIAVNGNHFSYTRHEPVGICGQITP
WNYPLMMATWKIAPAIAAGNVVILKPAEQTPLTALYLASLIKEAGFPAGVVNILPGYGPT
AGAAITSHPDINKVAFTGSTEVGQIILQAAGATNIKRTTLELGGKSPCVIFDDVDLDKVV
PQAQEACMTNMGQCCVAGTRTFVQEKIYDDFVARSKELAKTRKIGDPFDCSTVNGPQIDE
EQFNKILDLIQSGKKDGAKLEVGGERFGDKGYFIKPTVFSGVTDDMRIAKEE
>Cuni_T007126-R1  Name:"Similar to ARHGEF18 Rho guanine nucleotide exchange factor 18 (Homo sapiens)" Cuni1017:2372-26866(+)
SCVIPLHDLLVREKGDVKGSLGIYVISQNPAEMYELVCKSKREREEWIRILQHAIKACRR
DVGLKPAQAASHEVILSKPVDINRKLEVASKVMSIIKELHQKDEVIRECCDDKNRLMMKL
LQLSTVNSEARSVSEAGSRPSSQEIDGLNESVEIVLAAMQEASRLMGILQNTDSNMGRSI
SVGEARTEDHVTTSIPRRSETFSGFDSSRGTSKTLVRNQSNASSETDKILTHISHSRQEV
NDRRYSDTPDTILVSKYENGSQSLEKQVSCDTSSEHGSVDELSAANILSLIGSPPVHDQM
ASVFQLVQYLNSLMNITSRQCTMVESLRAELEGAKEEISRLSADVHSRQSTLYRHDQMEE
LRQLQGNLTLEKQEWEKRKLYDCSRLQRERENLETERRHIEKDRMNLRNDQEALKREQDL
LHNEFNRMKEQHLRVSRTFDNRFNGSDLENIDRGQPMLQQRHLGHRRSASDARYDTVTVQ
ASESYSPYAWVRADEFPYEPLESVDSGEDYVPSSVRQDSFPFYVEEGMAGGVSHQSLPLK
TDDIPFPNPESAAVPAYVPSSSFSRQNSTRLSRVQSLSTVSRIAFRQNKKDSKGSSQKDK
FYEQTRKS
>Cuni_T007129-R1  Name:"Similar to SMG5 Protein SMG5 (Homo sapiens)" Cuni1017:130675-154454(+)
MKKRAEPNNGSKSDTDRAKRIYRAALESIKCLDGINKGKKAYREVFSPDAVGLRNKLKDY
CERLMFFNPVEYGRKAEEVLWRKVFYDVIQVVKRSKDHIRHHGSVETAYRTHLAAAAGYY
QHLVFRLQREFSLRLAGVIDYHQLPEIRAGRRNDTSSVKTINPSIQEWAQRACHRCLICL
GDISRYICDVDRMSIPTTACRYYHQAFMLFPEIGMPHNQLGTLAGSRYSGCEAAYHYVRC
LACEKPFDGARGNLTRLFEKNAKRFHELNTPQARDLPPDEQRHQDIKRFFTRFFKLLEIF
HGTSNNIEMTELQQLCQHALQDFNLCMFYEPQHQLKQRDPQGGAESRDFHLEDFHEFLDP
GDPASFQYLDNGIVFTIFGCLMCTIHLLEKTGSTNITAATAFLLALFSHLLNHVVIRLQG
CLEDMEHPNKILIAGSSLSSENMHNDESSGSEDERARRIDDHTLQNSVDNTARSVRNGSN
KTESKKSRVSTLRGLRRRRPQRRDMSESSDNMSDMSEVSDLSEGNDDDVDDGIVSSDSED
DDDLASYFDHGSDSDLSETEDAPEHEMKANTNNANSGNTGHGNWPPSGKSLPNGDMKHIW
LNGNGDKSLADISSELFSSSLMFLGQDLAQGNQTADVLNTRESVLVPP
>Cuni_T007133-R1  Name:"Similar to ALDH1A2 Retinal dehydrogenase 2 (Homo sapiens)" Cuni1017:393384-427376(+)
MANLTPIRDLEVKYTQLFINNEFVNSASGKTFPTINPATGEKIADIQEADKADVNSAVEA
AKAAFALGSPYRKLNASTRGQLLNKVADLIERDISYIASLETLDNGKAFALNGSIGDTNF
SAQVFRYYAGWADKISGRTIPVDGNHFSYTRHEPVGICGQITPWNYPLVMAAWKIAPAIA
AGNVVILKPAEQTPLTTLYLASLIKEAGFPAGVVNILPGYGPTAGAAITSHPDINKVAFT
GSTEVGQIIMQAAGATNIKRTTLELGGKSPCVIFDDVDLDTVVQQAQEACMTNMGQCCAA
GTRTFVQEKIYDEFVARSRELAKTRKIGDPFDASTINGPQIDEEQFNKILDLIQSGSKDG
AKLEVGGERFGDKGYFIKPTVFSGVTDDMRIAKEEIFGPVQQILKFKDLDEVIERANNTT
YGLAASIFTNDINRALTFAHSVQAGTVWINDHNYVTPQGPFGGFKMSGLGRELGEYGLQN
YVEIKHVVVRLPQSNAALQ
>Cuni_T007132-R1  Name:"Similar to DTWD2 DTW domain-containing protein 2 (Macaca fascicularis)" Cuni1017:321394-335080(-)
MSQCTEEGPLASLYIIDQALYIIIDDFYTNCFFFGFNFTKRPVSVCWCPFLPHEPVQVRT
TVYILQHPFEESRCLRTVPILQNSLAPGKCFVYKGKRFSAVRYPEFISALESPDTILLYP
GADAVDISELPTDKSYNIVLLDGTWAQAKGIYSQNPFLKSLKKVQINSSQRSKYVIRTQP
RDSSLSTLETAAVAIATLEYRPEILEVLVHPLVALCDFQIRHGATEHQSREFRVENGLWT
KPLPRSVQKRLLEKFAEQQPKSHM
>Cuni_T007131-R1  Name:"Similar to Tle4 Transducin-like enhancer protein 4 (Mus musculus)" Cuni1017:226061-279421(+)
GPQPGQPFKFTVAESCDRIKEEFSFLQAQYHTLKMECEKLAQEKTEMQRHYVMYYEMSYG
LNVEMHKQTEIAKRLNAICAQVIPFLSQEHQQQVAAAVERAKQVTMQELNAIIGVSGLQP
PIPPASSGSGFLGFAQGVFHMPQGLAALKEDKGADEKHRRSASPLDRDKYRHRSRTPEHS
ELSKKRRAEEKAAESDGEKSDQDLVVDDNTSPANGDMSPREKHALKDALKKDQDRDRISP
RSDASSHSSSSSKPKESEKAGTPVSKPTTPTNTGSSTPGPSVGIKHGSSLANGLASSALN
SFPRAPMVGFEAHVSHSAMRPTLNNIPGGKPAYSFHVSGDGQMQPVTFPPDALIGPGIPR
HARQINTLNHGEVVCAVTVSNPTRHVYTGGK
>Cuni_T007128-R1  Name:"Similar to LONP1 Lon protease homolog, mitochondrial (Homo sapiens)" Cuni1017:90204-130183(-)
MSAMRVVCLQKHTRGCQCRLSLLRCIICWQKKQAEFVVLKCQGLGKVAFRRLTHSSGAKL
TSLGSFSKCRSFHRHARIASFQRYAVWPGCHKGLFSENSNIVQYNGRCFSTSSQLLNKKS
DDDEGENTQKDDNAQGPTQEEAQEIVSNFNPVGALTTMTIPSYLPIVPIIAISRHPVFPR
FVKMIEVTHPDLMELLRRKIKFNLPYAGVFLKKDENNESDVVDRLDDVYKVGTFVHITEM
HDMGDRLRMIVMAHRRIQITDIAMEEEASYLPDPAADKGKRNRRRRNGKKDSDDVDKKED
DATQPPTSFSLGNIFGSTKAEPSSEEVEGTKSSPSHVLMVKTENLTHEPFENNDEIKALT
SEVVKTIRDIIAMNPLYRENLAQIIQAGQRVIDNPVYISDLGAALTAGEPHEMQEVLEEK
NIAKRLMLALSLLKKEYELSKLQQRIGKEYILKEQLKIIKKELGLEKDDKDAIEEKFRAR
LKELVVPTHVMEVIDEELNKLSFLDNHSSEFNVTRNYLDWLTSLPWGKYSEETLHLDKAR
KILDEDHYGMEEVKKRILEFIAVSQLKGHTQGKILCFYGPPGVGKTSIARSIARALNRKY
FRFSVGGMTDVAEIKGHRYVASMTGSVTGFIRFHFLISYLIHFLWTHQLCPVLFICTANV
TETIPEPLRDRMEMIDVSGYVAEEKLNIANQYLVPQAIANSGVDKEKMHVTDEAMNTLIK
SYCRESGVRNLQKQIEKIFRKAALKIVSENITKIEVDTSNLQEFVGKPVFTHDRLYDLTP
PGVVTGLAWTAMGGSTLFIETALKKSLDLSAKEAGSIDLTGSLGNVMKESAHLAHTYAKS
ILAKQFPENEFLQKAHLHLHVPEGATPKDGPSAGCTIVTALLSLAMNKPVRQNLAMTGEV
SLTGKVLPVGGIKEKTIAAKRVGITALILPAENKKDFSDLPSFISDGLDVHFVDHYEDVF
KLAFPDQ
>Cuni_T010604-R1  Name:"Similar to MARS2 Methionine--tRNA ligase, mitochondrial (Homo sapiens)" Cuni1018:27861-57923(+)
MKKTVLHWRLFSKCKHFHRRRPVTCHLTTSACSKPYFVTTPIFYVNAAPHIGHLYSCLLG
DAQARWRRVKGQTTLFATGTDEHGLKIQQAAASANLEPQIFCDSISQKFQSTFDAAGIKY
DTFVRTTAPAHRAAVHAFWHKLVEAGHIYHGSYSGWYSVPDEAFLSEDDIESRTIVDGST
VKVSKDSGHPVSWTEEKNYMFRLSDFQEQLLYWLNSSPIHPIQFEQPVRHMIQNLTDLSV
TRDRHRLPWGIAVPGDETQTIYVWLDALVNYLTVAGYPATKLWPPDCQIIGKDILRFHAV
YWPAFLIAAGLEPPSKLIVHSHWLVDNVKMSKSLGNVVDPMEKISAFGVDGLRYFMLSEG
SLDSDGLYSEKRVIERINSDLANTLGNLLGRCTAPVVNKEQQLPPLVEDNLFEFLSAEDR
DAHKSLYILPDSIDHLYQDYYFTKALDLVMSRLHWANSFVQLHKPWELAKLSNPSDSDQL
LTVLHVAMETLRVCGILLQPVVPDLSDRLLTRLGVPAGERQFSDAQRPATSGYQLLGDRI
VLQKKVGQS
>Cuni_T010607-R1  Name:"Similar to PLA2G4A Cytosolic phospholipase A2 (Homo sapiens)" Cuni1018:202267-246595(+)
YYVLFCFSCDPYQVFEVQHSPCLILTVRVLQGRNITLGFQDLYDIPDPYINLVMRSSPEG
RKSTTVKEDEPNPVWDETFTFFINFTKLILMESNSYWFDQLVGTVYYDIVNIRDMDKPQT
ETFVFNDISEVDIEFKLEFDRHPTLRYSLCLSHQEKSFIRKRKKHILEAMRKLLGDENGP
QNIEEVPTIAVIGSGGGFRAMTGYSGVFKALVESGVLGCAMYACGLSGSSWLVSTLYSHP
KWPDLDMGEFLDELKHCIDKSLLRFLNASTMYSYVKFMIEKRREGQPVSFTDIFGRMVGE
TLLADRMETTLTDQREKIKDGSVPMPLYTCVHVKKDVPARSFQEWVEFSPYEIGMPKYGT
FMDAKLFGSKFFMGKLVKEFKEQPLHFLQGIWGSAFCILFRRLLEENHQIDPTDMVREAM
GERLDEGSDSINTHIVNSASNSWELLSTRRGRAAVIHNFMRGLSLQQSYPLSPFTPVDER
VAPGDEFDGIFEMHPTSVKHIYMVDAGLAFNSPYPLVLRPQRAVDIILSFDFSARPSDND
QPFKELLLAEKWAKLNRLPFPPIDTSVFDKDDVKELYIFRHPTDNSCPIVLHFVLVNRKF
KLYKKPEIPRETKEEFEFAEFQLFDDPRAPYSTFNFTYTHSDFERLSQLTEFNTLLHIDE
IKEVRQVY
>Cuni_T010603-R1  Name:"Protein of unknown function" Cuni1018:15689-16642(+)
MVIYVLPAIILPGLVLNLVSCLVFTSKELKNFSSSIYIFALLVSDTGVLIGLLFVWLEAI
GYQVNHLNGVCQVWYVVCITVENYITICHPISFMVMCTKRRAVIVVTCILLLSLLLYIIT
PIATGVASPRSDKEVGKCWVRSEWMSVMHMMTYLDSLVTLLVPLIAVTGMLITIVLSIIH
RSRWKKRLSSLPVLETAEMTPITDSKRTGAHASAQFRVAKMLFALSVSYVIMNSPSQVSR
LYYLIRPRNPGDSEMTHSEGLIQLVLLYISYAHHASKFWIFVIVSKNFLKNLKQTVAELT
KCRC
>Cuni_T010611-R1  Name:"Protein of unknown function" Cuni1018:326595-329039(-)
GARSFITSEDQCSKTAVSACMNNVHKRTSDIGFCEQATAALDCFSELLRMCYTRNDPGFL
EALGMYDITGLFQKMTAL
>Cuni_T010610-R1  Name:"Similar to Fbxo36 F-box only protein 36 (Mus musculus)" Cuni1018:302945-318592(+)
MASKWERRCKPWLNEDGSLYSRTDVAPAPSKDFLQLFVTANEVIFRVWKIIPPTRADAVQ
QPSQTVCTYSEFIDDERLRATIARNFGEHELQYLDRLVAGQIDYLCRLPRKILLRIIFNL
DLVSIAKLSQTNRLFRELCSCDALWSKLYLQHTTQPITPDLLMLSDQKGWKELFFTNKLQ
LQMMLKRQAEKQPRDKRFAFAEKFSKGGASKGGSSKGASNH
>Cuni_T010606-R1  Name:"Similar to Acsl4 Long-chain-fatty-acid--CoA ligase 4 (Mus musculus)" Cuni1018:109055-147138(-)
MDILVSTLVLVLKALSLVCDVFTFVPYFIIQRPDKVRRRSARIKAKPVSGKPSDPWRSVD
VPPTGLTTSIFSECKTLDDLFVRACHLYSSQPCLGTRDIISEAEEHQSNGKVFKKLVLGR
YRWETYEEVSTRINNFGNGLIALGHKPRSRLAIFAETRAEWMISAQACFRNNFPVVTLYA
TLGIDAIIHGIRETEVSVVITSFELLPKFQDVLPKTPKVSHLIVMGCNRAKLIEAHLKMP
NEITVLSMQEVEVIGARPEHKNHVRDKPKVDDVAVIMYTSGSTGLPKGVVISHRNLMCGT
SGQIQRIPSLGENDAYVGYLPLAHVLELSAEVSCIAMGTRIGYSSPTTLTDKSTKIKKGS
TGDVSELKPTLVAAVPVILDRIYKNVWEKVNSSSLVKRTLFKFAYDYKYKHMLAGFDTPL
CNKIVFKSVTDLLGGRVRLMLSGGAPLSGTTQRFMNICFCCPVGQGYGLTETCGAGTVVE
FSDLTTGRVGAPLICCEIRLRDWVEGNYTTENKPYPQGEVLIGGDNIAVGYYNSPEKTAE
DFITIDRVRYFCTGDIGQFEEDGCLRIIDRKKDLVKLQHGEYVSLAQVETVLKMCPLVEQ
ICVVADNLESNIVALVVPNEAQLLAVAKKVGVDEQDLRKICKNRSVVASVLKELTNHGLK
SKLQRMEIPASITLLSEPWMPDSGLVTDAFKLKRKVLEEHFRSEITAMYGSGA
>Cuni_T010605-R1  Name:"Protein of unknown function" Cuni1018:73370-76652(-)
IAQLEGGTGGLTEGDYYATTIQGDGYWAPYGYRPGSATRTNSCQHVREVPPQLRSASVLK
PFGLSTFYQKYTEAYGIPVVASYSVPDDALRRACYTLRFLLAGNWAVRESFYRYSGRVAV
IGRDEGTTSIPEHSNLPSWWNLRARGLGATPHAPVSSGGEENVLCY
>Cuni_T010609-R1  Name:"Similar to ITM2B Integral membrane protein 2B (Bos taurus)" Cuni1018:286748-299142(-)
MTIYTSVQTEKKPDKDILVPEVVTEPLTGGKEDGEGDEIAVGIKVVRVNYFQASRRSFCI
HVLLTVMVLVILACGAIGALVFYRHLNKKVYSGVCGNVYFDTIYHAKSEAMSESVHMAAE
FRDTTQMDYFEEGIEVSEVDLFEQLYTPQFDEVQENYVWHDFSRNYTAIIDHHIRHCYVM
KLNRTAIAPPKDLIDLVDKLMSGYYMPKAKVIRENYRMIRPPLSNLEHLGKRINTKCSHY
ETFWLEKFQNRVMKRSVSYLPLLATNGPLIHTHCMLSNFADHQEIFKIFIHDTEMESSAE
LGNHTETARNPELGYQ
>Cuni_T010608-R1  Name:"Protein of unknown function" Cuni1018:262785-267020(+)
MSGYPYPNTSYPYPAGSVPPPEKSAPQPYPYPYPQQNYPQPPPQPNVTYVINTAPTQPPP
PPQNTTIVYETRPPVFRPAGLGLGLGIGAGLALASLGRPHPHPHHGFHHDHHHHHGPPHH
HHHH
>Cuni_T017916-R1  Name:"Similar to RFWD3 E3 ubiquitin-protein ligase RFWD3 (Ailuropoda melanoleuca)" Cuni1019:67304-96912(+)
MSQSPRNSYQRNVSGENIVLVSSSSSEDENEDISLLHFRHSLSTDRRTIRELVLEGKRLL
ALAEAKSCPEDFRTDASTLYRYNFSSAVTGNDLFRERELAELLDLVSLLKMRLSAERVFS
LGNPQLRSEQAVFDELLMHFSDELLDLGQSIRSVGTRDESTSANAGFQSSTDPGSSRLIV
NIDSEINNSTATQIENSFTQHFSIQNASATDPLNATVGETQNGLVSVGLHENISTNSSRA
EGQLLQDINISSLEDFLAKVRELSSLASLTQTVSNSVSTSVPYNIFLEIQRSLSSIMGTT
STQTNQSSLRQVKRKRSEEDNCEVAKKSKAKNEDSRVDDEDKEEDSCSICLEAWSTGGDH
RVTCLKCGHLFGYSCIVKWVEQAHCCPQCKALAKKSDMRHIFVRKITAEDTSQRDRALRL
LEEERASKRIIEQKEAMTRKKLETQASDIDALKAEVFQLKAQLSDTGGCFRLQGSVLPTA
RTIISSSQSANSKRFHPFQRISISPEGSCRVFDQCKELGLLVASQKSPNALFRGYGIKIL
TRDFRSLSYQPLHTAPIRDMCFRPSAFDGLLLSCGLDKCLQLSSATTKVVVQKYTVNSAV
WCCAWNTQNTNLLYAGMERGVVREFDIRRTDCHVQDVVDYGGSPITSIQFWNGQVDGNNL
QGLLIAHLQSLIFAEQTSEQYTAHHLPHLQAPLMSLSLHPSGKYLSSFRPGTSFPRCRYE
ICSLCQGTVEGLPAPVSSSCQANWEGSNMQAVISRNCLMSKPESEDSLLAITANHSNNT
>Cuni_T017918-R1  Name:"Protein of unknown function" Cuni1019:225243-229371(-)
PPENVTFNLDHAFADSDTDDSNDIPDEDADTAYDLPGPSSVESNHVLDPPAWSKWSEWFA
ASAASKIRVRTCEVDGEEINEAVCEGVRMQIITCDKMNSSMCGKVQGIRTLPMDGCAESF
KNMQKREFLQ
>Cuni_T017917-R1  Name:"Similar to Hr3 Probable nuclear hormone receptor HR3 (Drosophila melanogaster)" Cuni1019:130384-151904(+)
MRGRKNPMNNQTPPNLPPCKICGEQGTGFHYGVTACGACKGFFRRSLVRKQPYVCNANGQ
CTIGPETKRRKSCPKCRHDKCLAVGMSKEAIKTGRYSYVKKSHDIIEMIEHHFHHFVKRK
QFGDYKMSRESIEDDLDISAKKSRSSCALEKISEAFRKPGHEFMELSPTKSSLSSENAFT
FDDSNITDETVFPVTEINNLINLEKEKIGVLKDNSTRSDAMGSQRNTIHTLPEGNGIYAG
WCSGIKNSEFAHYFNSSTTKSCQASPTSPPVSSSSPMSDMSSSRESSMSVSTSWLEFPNY
ADSLYTVTSPDDSGSFLAYPDNVYDADFESYPQQQRWHENIYFNDDEYAKSKDERVIIKE
SLFSNQASNTVPSYTAEQDTLYGCSINIQEYNSYNKNIVPAHNTQFLHLHTPVSNELEQL
RRLSWDDMSFGDDFLCPGSDFVTDKSRTPQKNKSSNNKDVTACFPPNNNIIRLEKAWNAG
PLLPEFSNNSYWDLDETRLKSKDVSFNNSIDHKKEHFQFESDINQSCTSYSSPTFSGSYY
RERQGSDSSIESYSLDTRFSPAVPSDQQTLSDCKSSLSECEEALTVGGTSPERHFVEDSQ
NSYGLSGLLINSSLPLGSPSSLFSTSDDLDMSSIKKGPAIISQLSDTMALEESEEPLNFL
NIPYENTTQFKKTGKLISYVALQSQEMSANSEDDSPKNTKHLPTLSSEVSNDDEHLEKWT
PFSLGGETPRPIEQEGKPESKIRLHENEEDYNSKPLPWCEFTEAELDEVVMSLKTAYQKH
VVIDSHLLSDEEIAEKLKSFLDILELREQTYGKLIGMDREAYFNILEATGIDVGGRRDWT
ETHAKILNRTLQKTVRFFRSVPGFKDVCHEDKIVLAKSCLYEYVILSCYRGVNLEKQVIL
DAEHKYAISMDVMKLMIPEMEDHMLDMLAISRRLMELKLSFEETLLLKAISITSPDRDKI
QDFEKVDRMYWRLHCCLILSLWRLVTVLTDLRGLAFYGRQIMSNLKPDIMKLTKDIQVPL
YLEMLFSETDSSTSTNSTSSRHGQASALTDTGRSAH
>Cuni_T017915-R1  Name:"Similar to G-protein coupled receptor GRL101 (Lymnaea stagnalis)" Cuni1019:42531-43649(-)
MTLQTLDLRGILTEDLDDYSFHNLTISQELYTDLFQICCPQIQGLVISPRACVAPVDQDA
ISSCSNLLGLDIQRFLLWVVAILAVLGNVMVIVYRVIWDRSVLQTGYGLFVTNLGISDFI
MGVYLFMIAGADSFYRDSYVIYDKSWRNSVVCKMVGFMACLSCEASTFFVFLITLDRFLV
MKFPFDQIKFNKTLKTIAVVMSWMASSLLSLVPIVFNFDIYSSNAMCLGLPLTNTQARVW
EYSVAVFIIFNLIMFLFIACGQYAIFRAMSENRVSKTTTSMPSSRRAEDITVAKQLSLVV
LSNFLFWFPVGIMGLMSLGGYEVSSQVYAWTTVLLLPINSAANPVLYTIPALLVKWEQFK
RGDKRAPSGSMQ
>Cuni_T005874-R1  Name:"Similar to FEZ2 Fasciculation and elongation protein zeta-2 (Homo sapiens)" Cuni102:523-18125(-)
MWWTITGNFGNILPIDWSKSYTRTLHNRVLNLEEQQEVKQPLCLDLSDDEDLAQAFDMHS
LIVSSLHPEEEDKILTADEVISEIDDMMKEPSAEDYYSAMQDTPEDVAYTKVKKTLASLS
AYTLGDLKEMPQAALHEL
>Cuni_T005878-R1  Name:"Similar to Nemf Nuclear export mediator factor Nemf (Mus musculus)" Cuni102:497224-547520(-)
IMEIMKAGKDGDLLKKLLIPNLDYGPAIIDHVLLGAGFPENVKIGKGFTLDADFPRLMSA
IHEAEDLLKKFMAEPCKGYIIKKKDRKPNPQPGEEEEIWLYEEFHPYLYRQHSKMAVSEF
DRFDQAIDEFFSKIESQRMDLKIIQQEKTILKKLEHVKKDNEKRIEGLQKEQETDIQRGQ
LIEMNLDLVDKAILIVNSAVANQIDWTEIWNLVKEAQINGDHVANAIKALKLDSNQITLL
LHDPFAAADTGTEHLKPMRVDIDLGLSAYGNSKKYFDKKRQAAKKQQKTVEASKKALKSA
EKKTKQTLKEVATAASINKTRKTFWFEKFLWFISSENYLVIGGRDQQQNELIVKRYLRPG
DLYVHADLHGASSCVIKNPGGNPVPPKTLNEAGTMAICNSAAWDSKVVTSAWWVYHDQVS
KTAPSGEYLTTGSFMIRGRKNFLPPSYLIYGFGFMFKLEDGSVERHKGERRVKVTDDDAM
SVTDSAAASIQESDDIDIDISDGSSSEAEEESATASNDPSHHTDVGNGENNEETSQINDE
NISEEGDAEVKSEPAVDKVPTSEAKVSSADTEKEKGDVQSFEFPDTSINLLHVKGDKYEL
HREWSTASTNSDKPDTFFLGDGMPVTLGEKISSKSGKLSAKQRRDMKKQKKGPTNDKSQS
EDEDKVSQDPDGATIDAEVESDSRDKFKPDNSSCSQAGQPKRGQRAKIKKIKEKYADQDE
EERRLKMEILASAGPQKDDKKAKGKKGKGHEYPKQQKPNQGPKAAAQKNHAQKTPESHDH
VPDLDVADELDKITIANEPGEETISAATHKQDPDSDGEKDEEANTGSDETVLNSLTGIPL
PEDEILFAVPVCAPYSALLNYKYKVKLMPGSGKKGKAVKTALNMFVHEKTATSREKDLLK
IQKDVDLARNVPGKVKVAAPNIHKHKK
>Cuni_T005885-R1  Name:"Protein of unknown function" Cuni102:829806-867932(+)
EHKWQKALEQIFDENNPANLLLSSDNFLKEYYSQIPKPGQYHRQYSVGESPIDYLQNAVY
CLATAIKFRPNDPNLHFRLAMTLEEKYHAEDMYGLKKEEKVEAPSLNLQAKESSKEEEVF
AICKLKGVDPSAPVSHQLQALDAEYHHLLDTQQSAKADHVQNLYVWYSKKVSQEGAAAHK
AEDHQSPLGQAYQKYLDALCLEESNADYNFHVGRMLVIMGNYEDAITRLQAALSKNSKHE
MARLYLGLSISLSKVEWKKRSKEAIKYLLAGLEILLCELSKEANMAEELVIKTSLFAENL
VRATNVHLLRSVIQLGNLLMNNSDVKEAMAPTDVFHTAALLASQVLPKICRGDLYKQVEW
VLVDAHTQLLELLTQRPAGNEDLIALRCQRLSALIFSTTISGNARLLELQEKTCQKLVKI
QPCVSYVLFLLGSAQLALCDNSPAGDKVKEKLLEAKASFEASIELEGKSTKGSPPEVIIK
QKWWSELTKKENAGKTATAALEDTKGSALPSAPTGTAPNGGRGGSTAAAGRGRGVAVKDN
KPVESSSSNPPAKADNPAARGGTAATRGGPAARGGGGKTPSAPAVATAVVPEQESTAQPR
TEPQIQTSLKVAQVNAPSYQPRLGLARVLRALNEPNEAKKYYFQVMDMAPEVHDAYIESA
EMLSKTDPLEAVNVYCRFPISDNPTYDDAYIFGEVVRILIKNEKFDDERLVKNMIAYGKV
LGLVVLDNYTKILEQKHKNDLLKKVYAGVNNKSVDDPDMQAFFKFKFWI
>Cuni_T005879-R1  Name:"Protein of unknown function" Cuni102:642868-646506(+)
MSSGVAFSTLALVAALVCLMTCVRSSPMNVIEPVVPLVEMESEHACFFICNICFPEPEDT
QNLLECSNEVCLTMMGGFCPMEKFLWLGHHCRHYSELERMWSSYAKH
>Cuni_T005875-R1  Name:"Protein of unknown function" Cuni102:48576-54692(-)
MAQIFGIDHKYFAVPAVALSVGISAYSVYRLYSQSARKCATRTPSNVYESEKLLGEYLVF
HYGSPEQLIPYPFGPKDALDFPKRSSELCLKHYKAEDGIPSRALDVGCAVGRSSFELARE
IQDVIGIDYSQSFVDAANRLKIDGQVPYSLVQEGDIVTPAVATVSKDINRNLVSFEQGDA
CNLRSSLGEFGIVLAANLICRLHHPKDFLSRLPKLLSKKGSILVITAPYTWLEEFTDKSL
WLGGYIDQNGKAVTGFEGLQRELGSDFELVEDVNIPFFIRETARKNQWTVAHATVWRRK
>Cuni_T005881-R1  Name:"Similar to slc46a1 Proton-coupled folate transporter (Xenopus laevis)" Cuni102:700430-722688(+)
MRRDSTSRLLPDDEASETLPANQTMTSSVSRIKDKCPFIIINLIVVLLGASGRFHTPVLV
QYLYQRYADEIFGNASVKTSSHPCINESSASSKEESKLKEVQEMTSDMLFFLNLTNYCPG
IFTCLILGAFSNRISRKLQLAIPMCGYLTKCVVIAVVVGFNLHVNWFFLGFAVQGALGDT
CGVFLGIFLYTTDITPRDKTRTLAMSIVEGFRGFVAAGLNVVTGHLIQRLGFNIPALLSV
GLALISLVITFMLPAREAQHQYTLVDDDCHRWNNWWRRLISPFTRIREARVRKLVLVGFI
AFLFAMAASVGITVIESVYLMNIPFCFDAITLGWYKFGRELAFNGFLVVAVPLFYNSLPG
MWLAILGSLSAICGMVMYSTATKPAEVYAIIGLMIGEALPVNIIRGETSRLLASETQGPL
LAVFAMLENIGYVMGIPALHVYRATLGFFKQLVCVVCASVTAVNIGFLLYYQVTWKRHLL
DVQSNKIRQRSYDAIN
>Cuni_T005884-R1  Name:"Protein of unknown function" Cuni102:815160-823518(+)
NSGGSRDVPLKEGATTDIKIEVTSEDGHVKNYFVHARRLSAKDAVLTKLSVQNGTLEPEF
NPGQEMYFCLLPSNTVTAVVTAVAPDPKNDVSINGNPPNLPISLNLGLTVANIEVTSADQ
SNKKAYKLDLVRKQIPRYVKFTNPKSAIEYECPISLSPLYCPITIKNSNPKCTYSGPSII
ELTRTSKVDPLTGQPLQPGWDVCDLDLEKKMAAEMVVIPLTYS
>Cuni_T005887-R1  Name:"Protein of unknown function" Cuni102:900461-903572(-)
MIRRVTGSFIRGFFTITGRFIIDCTRIIINFNIFSNIVERFKICFYTCSFYINVCWMIHQ
RPIVFEVVYYQVVSSYRYLMT
>Cuni_T005883-R1  Name:"Protein of unknown function" Cuni102:790086-809015(-)
MSSSHKQKHRTGIPVFKITPRNECEDVNVSSARSQQTLPLDSQQQQSRSTSRNQQSQNQK
RDNTVVQPKLKTTKKNQGAETWADEVIQSQGQILRNISVSDSKRRRDDLEKQLHEAEAQL
VTMGKLLEQREKLMNEAAEEAAKKTAELEQKLINQDGHLVKYGIDPVTGMQITLDEEGEK
KVEATEKFTKKRVQEMRAKLQQMNSQAESHLSDIENTLQFLNGLELAVDRAGQSSGSVLQ
GFDIDYGDDKQLDQICHQHAGSGVCNAVVRSVLGEKKPLLENVSIGVTVNDDDGDIANCR
YLEDHCDKLGIVEPEKLGNVDILDAESAVEEKIS
>Cuni_T005876-R1  Name:"Similar to Galnt16 Polypeptide N-acetylgalactosaminyltransferase 16 (Mus musculus)" Cuni102:136288-178695(+)
MTRKKRCLSFSVLLCLFSGVYILWHIIWNLLSRNMPADLDISLLQELHYAKKLTLTGQNE
PLHQYGYHIVNSYANRPGRHIPDTRHPSCHSNTSHMLKKLPSASIIITFHQVDQSVLLRN
IASILVRSRPAVIHEIIIVEDGTSPDGESQFLTQIPGIKVFRNKESQGRGVARTQAAARA
TGDVLVFVDGLTEVNVDWLSPLLLRLMESPRNLVAPVLDSIDHMTFEYAPVSTLFRGGFD
WSLQYHWEDIPISYMARPHPMTPVRSPVISGSVLAMRRDFFNWLGKYDQTQGAKETEDIE
LSLRAWLCGGQVEIVPCSKVGVIHFKKGQMGVPQVSFSAYIRSARQVAEIWLDDYKRFFF
AVRPSARMQPKADITLQRKLKEKLKCRNFKWYLTFIYPQLQPLISDEVAYGHIQQGNSCI
DFDPGQLPIVAKLRNCEDDKDSQEWSWRKKGVIVSSGMCLTSDLMNTQGFVVVQFCNDME
NQLWYRHDMKIVHQETNLCLDGRQANTGLLISDCIKDSASQMWYISNEKLFNNPELAYLN
FDNDNDHGDVHDDQL
>Cuni_T005886-R1  Name:"Similar to LIN52 Protein lin-52 homolog (Gallus gallus)" Cuni102:874809-887006(-)
DDKLLSFEKLDRSSPDLWPEKIPGVTEYEVGRSIKSVGTPRWLADLEKDDINLLQEFGSL
TLSQLMEKVRGLQNLAYQLGLEEAREMTRGKFLNILGKPKPPR
>Cuni_T005882-R1  Name:"Similar to mab21l2-a Protein mab-21-like 2-A (Xenopus laevis)" Cuni102:735075-782799(-)
MEELSAALHKFNQNIVEVSRRVSRDTITCCMTQVILPLLEKIGEIDVRFRCASPMPNEVY
FPGMKSSCMNEFELTIILTNLLAAKTFEDGGSHDGSLSCYGRVLPLQSLHQIGDVLVEAG
SSQGVVSAHRIRQIFAQLASQAVSFLPVVSGMSVDVSVKEPFTVIKILKATELVIFELVP
AFMFLHDWPTSASTWPTEVKGWLSESDIKSVKDAGFYAVALPCSASPLDPSLFRISFSNA
EKYLLRPAWLENYKPTAVCRKDSERILRMIRESDKDAFIPVNCYHIKTILLHDCMRWPEH
ASWLPEKLAERFLDLLRDLILVLENQNLPHFFIRDCNLLRDYNTEQLRAAAGRLRVIYHD
IYSSPSTSIRLQCY
>Cuni_T005880-R1  Name:"Protein of unknown function" Cuni102:661158-678117(-)
MMLQLLMAVCLGALCAQGKTVSNFDHYDCAQVPAETTRWKATVSLTKPVYLVEAVGGEVT
FIQDDGQYLEIVGTEQKPNNYVCLSIHGKYSGEAPKAVVHVKPLKSSSDVTTREIRSIKI
RRATDVWHLSSVPSTSNIKTLLQGFEPYVHKWGDDSMSSSTAHISSPALAVHYAKGSYSQ
TKNVRGVGLFTTPNGLSSSADDLVLNYDIYFDNFGWGRMGKLPGLYGGVQGEGAYQCSGG
NNPSTCFSLRLMWRSGGDGELYAYIPSNQESGFNDRDDVIANSDYGQSIGRGKIRFQNGV
WQTVTEQVHLNTIGHTDGWVKFCNQVHGGGSQQCYTASNLRMRNSAGHHLRGLFFSTFFG
GSQPDDAAPNDCHTHFKELRIQVPDGAVVG
>Cuni_T005877-R1  Name:"Similar to ESR1 Estrogen receptor (Gallus gallus)" Cuni102:213291-236854(-)
MKLEIGGAVPGSSIQSKLCQVCSDTASGFHYGVWSCEGCKAFFKRSIQGPVDYICPATNT
CTIDKHRRKSCQACRLRRCYEVGMNKGSQRKERKSSNATGGLKGKRCRADSSDSTVNSTN
SGASSLKAAKRSRSASILEALQKADLPVLESYHNHSLPATRVHLLNTLIKLADRELVYLI
NWAKHVPGYTCLTLSDQVHLIECCWMELLLLNCAFRSMEYKGRTLVFAPDFHLERQQWAL
TGMGDVLEQVSAVSEQMVLHGLNKEELLLLQATVLVNAEVRPMDSFVKIQDMRQVILDVF
MEVAGRHQGYGNLRHAPSILLLLTHIRQAGERGITYFQRLKLEGSVTFCDLLTEMLDAHS
ASGEQRRLQQQHQQHQQQHPGQSQHHHQHPSQNQHHQQQSQHHHQQQHTAAPE
>Cuni_T020380-R1  Name:"Protein of unknown function" Cuni1020:102455-104084(+)
MGSKHYIGLINATAGSYLANTDPFVSDEFRVIFQWICFTVVCQSIDIFGTVTNIINSVCF
IKQGFKDPINVTLIGLSISDLGCLVTLIWLNICFTPSFQQADLPFDPTGILYLTAGWPHV
IFTRVTSWITAFITLERCLCIALPLK
>Cuni_T020382-R1  Name:"Protein of unknown function" Cuni1020:290028-290236(+)
IMSFQGNPNITETIFRMMGQDKLVSNDALSLYKWIIHSSICQAIAIFGIAANAVNMICFV
KQGFRDTVN
>Cuni_T020383-R1  Name:"Similar to ubiG Ubiquinone biosynthesis O-methyltransferase (Rhodoferax ferrireducens (strain ATCC BAA-621 / DSM 15236 / T118))" Cuni1020:312234-314593(-)
NRLSSATHDFLEGYTSYHLDEYVENILKHVDGLKKKLENGIQVLEIGCGRGRLLEKLALM
FPKSTFTATENAEFLLDQLKANLGHIPNIKYAALDVCCPSTLQGQQYDWVFCINVIHDVP
SPPNAYRNIKKFMKDQGGTFTMVDPASSGSPISDKGNLLVASLYAISSFFCVAESYINEH
SHAMGMCYGEKRAVDFLTAAGFSVEVVRFDYPMALFVCK
>Cuni_T020384-R1  Name:"Protein of unknown function" Cuni1020:319664-319827(-)
MAESFAVRLGSIVSSTYVGFALSLCKDVGILEVLLESKIPLTSQAIADKKDLKE
>Cuni_T020381-R1  Name:"Protein of unknown function" Cuni1020:110208-110795(-)
VKQVVTTKRVSILVICVSITLIFSTTPVYVVNRLGMKFYPARNKSLVGLVYTENKEFVET
ISFVINNISVTFGAFVVIITCTVVLVFKLKKSVKWRKGITNSKQIQQVSSRNQGVARMVV
MISSLFIVCFIPISVIFVAMSLEPELSINGRYRNMLIIFGGLGTILESLNSSVNIFIYYQ
MSSKYRSNFHQLFKC
>Cuni_T011664-R1  Name:"Similar to CMD1 Calmodulin (Pleurotus cornucopiae)" Cuni1021:185218-199148(+)
FHMFDKDGDGRITAKELGTVLRSLGQNPTETELRDMINEVDADGNGTIEFNEFLAMMSRK
SESHELEEITDAFKIFDKNGDGYINAAELRQVMSNLGEKLSDKEVQDMIREADLDGDGRI
NYQEFIRMMTSDKHLASLHSRHSHH
>Cuni_T011661-R1  Name:"Similar to Sars2 Serine--tRNA ligase, mitochondrial (Mus musculus)" Cuni1021:42168-79119(-)
MLTAKLNSISLGTALKHICQHCYKRLLVHLNDTHLITSGTSLQLGPKVHSELKYFTRKFH
KVSALQSLEKKTSSLFNHSESSQPSEWDSPFQLPVPELDWAFLLDRKNTEFIANNILNRK
GIGDIYKVISLSEQLDKEQNEVEKERIHRELISEALDIPNLSHPNTVIGDESGARVVEVV
GTKKEFDFTPRNVSEIAGRGLKMLRDERLTFSTGAKTYYLEDGLAKLERALVSFTLDKLL
KKGFQLVSVPDLLYPGVIDSCGFKTSSDRSQVYHLHPRCLNGACLAGTAEMSLAGYFMNE
VIPYDQLPKRMVAVSRCYRAEAQERAAEKGLYRVHHFTKVEMFGLSSCESGTESEDLLHE
LLSIERELFSALGLHFRVLDMPTQELGAPAQRKFDIEAWMYGKNIWGEISSCSNCTDFQS
RRLNIKYISPSGELRHVHTVNGTACAVPRLITAILEQNQQQRRKLDLPEILWPYLGGLKC
FSPEWKKSSYTFIKTLSKV
>Cuni_T011660-R1  Name:"Similar to zfp36l2-A mRNA decay activator protein ZFP36L2-A (Xenopus laevis)" Cuni1021:15228-19075(-)
MDNRLALDAQSTQTDFGEIFIRNRRIGVFRIGTDPPPERRSTISTMLPCSYQNNRIRNLS
GGSSGSTASGSSSDSSTQLDNQLSFMDFPLTTSSSSVPASRGGSSSNKLDRSWSDNDNGS
QRSVNSSRYKTELCRPFEESGSCKYGDKCQFAHGYHELRNLARHPKYKTELCRTFHTVGF
CPYGPRCHFIHEDETKSTNTSPRLGRDASVHSGSGSSSPSLSPSGVDDFTIFSYPTENSS
PRMSAAKTDNCQFDALSVNTEHARNICDLHALEKRFSGMKLDRRSSNDVFCTNINQPRII
GSEVPDIFSEITMFNSAEVQLDNAPKSLSSGGPQSGRLDNFPCVDSHSAYWQSSYENYYS
QLLKSADSAHISPTGSDGSSCSSNHSGSTDSLTSNSFTNWRCQVAIGQY
>Cuni_T011663-R1  Name:"Similar to calm2-b Calmodulin-2 B (Xenopus laevis)" Cuni1021:122766-131987(-)
SSSELSSAQILELKEAFSLFDKDGDGTITTVELGSVMRSMGQNPTETELQDMINEVDADG
SGAIDFPEFLTMMSRKLNALDQEQEIRQAFEVFDKDKNGFISRSELKQVMATLGEKLSEE
DVTLMLKRVDTDGDGQVNYKEFVQMMLAK
>Cuni_T011667-R1  Name:"Similar to TTC7B Tetratricopeptide repeat protein 7B (Homo sapiens)" Cuni1021:343890-366690(-)
EITKCINRYREMLRAVESRFTQEIRKTLALELAQLLLRSCSVSSYKPLDVNDKGLNKDTR
TPKPCIYSSEKLFIPKNLDEEVLLLLLIAEAVGTREAVLERKEEIHKLTVTNITAIYDLL
ALILVKRGQFGRLTESFDKAMRFSFQEFHIWYQFANSLISSGKHSQALPVLAECHRLAPQ
NVCVCLQAAQLCYEYLQHYQQGVEWAEAAINCKGTLIQTARSHMALGIGLCLVAKESKLL
AERQELNQRALKAFKIAHESDPQDYLAAFHLALQFANLRRINEAVAYTKLSLKHRSDFIH
SLHLLTLLLSARKQHEDAMTLVLAALEEYPDNLSLLMTKAKLQKIVLGSEEALATYQKML
KLWKDLHEMDTADDGSDSKYRTRDKMWDKRSIAHIAISEYSERGSGSIRAESVAASRMEK
ALSDLASSMNSSFQPRAGPQRSWVIQAQIWLNLAELYLSLNQVNEAQKCVQETFQLFPHS
VYVFFLRGLVLEHKGNLMEARSCYENSIAVNPAHTKSLYHL
>Cuni_T011665-R1  Name:"Similar to Calmodulin (Locusta migratoria)" Cuni1021:294953-303085(+)
MADQLTEEQIAEFKEAFSLFDKDGDGTITTKELGTVMRSLGQNPTEAELQDMINEVDADG
NGTIDFPEFLTMMARKMKDTDSEEEIREAFRVFDKDGNGFISAAELRHVMTNLGEKLTDE
EVDEMIREADIDGDGQVNYEEFVTMMTSK
>Cuni_T011666-R1  Name:"Similar to STPG4 Protein STPG4 (Homo sapiens)" Cuni1021:307969-337858(+)
MTDTPTAQTITIPLFTPKVCIRRRSTYVTEQPKRRRAFSLQRKSCVHPWANREDPSDAYE
LPASQREIWWRKEVKVTPIPGAYDEIDFIQELVKKPNTYNFKALSRNQCKGHAGTGTYLM
PGSYEYQDFLQILSKKPATYSFKTSERFAQDVLNFGLKDKYIDVPPNAYSTQNYLAIDGE
KCPVKNSMFRSQSRRFSYLLGNKNVPSPATYTVKDPYAVAPAITSFYTKKNLMHFPTGEE
LY
>Cuni_T011662-R1  Name:"Similar to PIGF Phosphatidylinositol-glycan biosynthesis class F protein (Homo sapiens)" Cuni1021:80991-90682(+)
MRSSKRYILTLSLASFLASLLIGLLIYLLIKNEGPFSITSNPVNGVKICITAGCVHCLLN
FILFYVYAPNSLESGFRIVNIAKCCCLLVLACFTFHVIAICFGAPLIKSATETLHFAILL
TVLVCLPFCLFFGPSIENWFEVFIDKSSHVGLETVVYFTSLSALLGSWLGAIPIPLDWDQ
PWQEWPISCVVGAVGGYSVGLLLSAVYLPRKYSTLHKSKFF
>Cuni_T019600-R1  Name:"Protein of unknown function" Cuni1022:98626-99810(+)
GSEEDIEAFYDELDMAVDQCKNCEVTMLLGDFNAKIGSEKVYGIRIGENNRKESHSMYQK
INMLTGNITRNSTGCLESKDGDLLMGQSNIINRWTEYIEELYDDNRPDVELQTNNDGPPI
MTAKVEDAILHMKKGKAPGPDNISLEEIEALGDFGIKIITKLLNDIYNSGYIPNDRLKSY
S
>Cuni_T019601-R1  Name:"Similar to Scyl2 SCY1-like protein 2 (Mus musculus)" Cuni1022:118397-181626(+)
MLHVHQQSLKVKEGNGYLEGTCGAGVAHRGLSVTNRGRRGGSRSEEDNDDSEAETGLWHQ
RCRPWACTMEMFSMLKHSMGADDVNPITKYFTIGKQTASAGVEMVWKIYEAVRTDDKKEA
SVFIFEKKIADKLHKPRRREVVAETLRKDVWYLEQLKHPKILTVLHGIEECHDSLAFATE
PVFASLANVLGNHDRLPPNISAEIRDHSFIELEIKHGIVQITEALSYLHNTERLIHCNIN
PQSILLTKKRSWKLIGFGFAEKIKDDKEGCTGQSWTTKIPKMAQPDLNFMAPEVQLNKMC
TPLSDMFSVGMVICSIYNEGRSLICADHNPSFYVKQLDQMHDTFGLVAHRMPLQLVEPVE
KMINKDVRYRPTAQLFSLLKYFNDPVVISLHGMDMHDRRDPAQRVEAYASLSQVVPNIPR
KILYGYVLPEILIECKCADSIIFALPTLITIIDYATRADYVDIIMAEFRAILANTKPVQA
TVYILNKLDIILTKSPLDETKGEVLPFVFNTLDSSSLQAQEAALGAVGVIKEFLDDNILR
KVVLPKAKSLFFRSNSVKIRVNALTCIDHLLDSLDKMLILDNILPFLANIPGQDPDVIMC
VV
>Cuni_T015046-R1  Name:"Similar to Efr3a Protein EFR3 homolog A (Mus musculus)" Cuni1023:92543-123649(+)
KHLESPQEEDNPAHLAEVVFRDLICRASYGNIRSVILPVLVHLDNHNLWVPNDFAIRVFK
IIMFSVQNQYGYLVVQLLLAHLDKHTKSDPRIKTCIVTVLYEAVLISAGSSTGPSVLEVF
NNLLRHLRISIDRRSADQSLRNEEIKFEDVVVNTIGEFANNLPDYQKIEIMMFIMGKFPH
FTSDEEIGKMDRQLYVNLLRTLLKVATKYKTVSLTQAFPPEFLNPLLRISLIDDPGMRLI
VQEILHTLLDRHGNAFRLKHISIPKDISSLHLTIKANPRQELLFMKKSGMQLYWHILENL
QLESNRVDNFEAIYCTMCLICLEVGQDEVIIELARLALDIQQLALKSTSLPMTHLCAIHS
LVAAFLNFVGQTTSLCTLYHYVQRVVENRELEAPHLLPDFAFNRSNQPNRF
>Cuni_T015049-R1  Name:"Similar to rwdd3 RWD domain-containing protein 3 (Danio rerio)" Cuni1023:321949-334362(+)
MDNTQQEEEIESLRAIFCRDGEFTAEKATEGQLVTINFDLCSDVEAERNRTNGSVSILLT
PEYPQTQQPKINIRCSYLPVSAIANIMQKVKEAAASLQGQPMLLDLCYLAQELLEGEMKA
LQSVEHNADGDSFVSQTKMPGAITKRHLQKQRLNNIGSECPFISLDNSLTVKNSKSECRN
HDSSRTCQLQDMKSTHNKQVHKSKDQNLSGPENGLKLMTVLLQLDHMRSKNNYIKLIKKW
SVALGLPGRLIFCNKLILILLQGTSQAIKEYVIMNRTTIVDVDSKGKGCKERMLTVLCEI
PADSHARLSDFCVEEVATIKSLQELFHNCSLSDLYENYVSNLIHISGSRVTSSKQYR
>Cuni_T015048-R1  Name:"Similar to Odc1 Ornithine decarboxylase (Mus musculus)" Cuni1023:170433-180363(-)
MKHQFSKISSVETIAAPMPCITQLIQDKIDEFERMGSEDAFCVGDMGDVIKKFNTWKELL
PRVEPFYAVKCNSDNVVLKTLADLGAGFDCASKGEISQVMKLGVEASRIIYANPCKQKSF
VKYAAKHQVEMMTFDNEAELIKVREIFPHAKLVLRILPIAQVKVQCQLGNKFGCHPNNVH
KLLQRAKELGVDVMGISFHVGSGVGEAKAFAFAVKQAYDAWQIATELGFKMTLLDIGGGF
PGQSNAPITFTEIAAVVNEALDTYFPHDDSVRIIAEPGRYMVASAFTLAVNIIAKRSITP
DVPDVDGNTPQAASHMYYVNDGVYGSFNCIMYDHAHPEPRVISDSPDRFVSSIWGPTCDG
LDCIVHECKLPELEVGQWMYFSDMGAYTIAAGSTFNGMPRPRCFYICSDDLWNQVHPEHR
APKRRCESLSADADYPLLMTGPDMLTLREAANSISCCNDEEIAFA
>Cuni_T015047-R1  Name:"Similar to efr3a Protein EFR3 homolog A (Xenopus laevis)" Cuni1023:143939-160853(+)
YPKEFEIKEGCLFYQERLADCLRSSGLDVTRLNTPFSTRPILSLGGSGEGSTSISDLGSI
NIDFDNIDGSPHLPKKTEEITVDSLKKMLAEDNTHVKVEEERRRREVVNMFRSAPFEDIV
AHSEAKSNHFHNKLTEILEMVSHDRLPTESPQEMVFPKLFVY
>Cuni_T015045-R1  Name:"Similar to TRAPPC5 Trafficking protein particle complex subunit 5 (Gallus gallus)" Cuni1023:47445-60032(+)
MSSLGKQKSSNLEKSLGKGKPEVNVATFALLFSEIVQYSQNRVHTVPELQTKLSELGQHV
GSHMLDVLFLREKGYKREIKLLSMLIFIKSTFWKIVFGKEADKLEQANDDDKTYYIIEKE
PLVNKFISVPKDKGSLNCAAFTAGILEAVLNGANFPAKVTVHWHKGTTFMIKFDESVIAR
DKLIEGR
>Cuni_T010340-R1  Name:"Similar to CETN3 Centrin-3 (Homo sapiens)" Cuni1024:230700-241099(+)
MSLSFRSDFALDKNKKKKKRELTEEQKQEIKEAFDLFDTDKDREIDYHELKVAMRALGFD
VKKADVLKTLRDYDREGTGKISFDDFNEVMTDMMLDRDPQEEILKAFKLFDDDVTGKISL
RNLRRVARELGENMTDEELRAMIDEFDRDGDGEINEEEFVAIMTGDT
>Cuni_T010336-R1  Name:"Protein of unknown function" Cuni1024:101402-101695(+)
VFWVGPVVGGLLAGLLYEYIFAAGATFGGFKKCLLRTKRPRKQPEAEPEKTPLEELKNDV
TEIEDTKVDVEKPQEVAEAEPEKGTAEVVEVNEQEKK
>Cuni_T010335-R1  Name:"Similar to AQP Aquaporin AQPcic (Cicadella viridis)" Cuni1024:68806-77718(+)
MFGIMKENVDDLLTPNLWLALPSEFLGTLVITLLGCGSWTPVSFPEGNIVRVALTFGLAV
ATVVLVFQHISGAHVNPAVTTAALFTRRVSIIRGVLYIIAQIIGGIVGAGILYGLSPGGT
LGANDLSPGVSSAQGFGVELSITFVYVLTVFACQDDKRSDLKGSAPLTIGLAAVVCHLFA
VPYTRAGMNPARSFGPAVIISSWENHW
>Cuni_T010337-R1  Name:"Similar to NEK11 Serine/threonine-protein kinase Nek11 (Homo sapiens)" Cuni1024:143023-172020(+)
MPPSRPLKDSDTKKARVLANRYEIVKKLGSGNFGTAFLCQDLKSGNQLKVLKETPVDLQP
DETVDAMREARFLSKLEHPGVVKCYDNFITEDSFCIITEYCEGGDLDQKIKERKHDEEFF
DEKTILDWTVQLLLAAEYMHSRRVLHRDLKTRNIFIQNNKMKLGDFGISRILMGTTDMAS
TFTGTPYYMSPEVLKHEGYNSKSDIWSIGCIMYELCTLEHAFSGQGLMHIMYKIVDKDPP
ELPSKYSNELNEIIKKILVKDPDLRPSAAEVLKFPYIARHRAKMKDTLTDEYKAKHNISP
ETAEREATELASLLRESSHLEDLRNTLDKSGEQSASETRGQLQTPTEKKQTPRERMRQKK
MQEADKKARELKKLAKIQLVENFARKQKIKTSLEKVSVPIWKGGHGEGEVLKQALSVRND
KPLSGSGREVLLYSAVTGKNSCDHESDSSEGENTTVLQTVIRRNSERGAGERYRGAGAGR
LTRSFSQGTARTDGDKPAARMVKTIGGMYPDDRQITPMRDKMIYDREHSSLDFKDGIPDT
PEEANTFYEQFDDFDGDDVIDTEDTLKHAEEELIHHLEAALSKYDNEESTVFHDDVAIDT
YGPLSREIKITNIRAECKKTLGQDVFDKAYSYLKEARRSEKRKDKSEKEIMDGLRQYVKN
PSDCFLVDQLLFLEEQARLS
>Cuni_T010339-R1  Name:"Similar to aglZ Adventurous-gliding motility protein Z (Myxococcus xanthus (strain DK 1622))" Cuni1024:211604-212170(+)
MLGLALQHTVKDTQHIVKDSQQHTVKDPQHTVKDTQHTVKDTQHTLKDTQHTVKDTQHTV
KDTQHTVKDTQHTLKDTQHTLKDTQHTLKDTQYTLKDTQHTLKDTQHTLKDTQHTLKDTQ
HTLKDTQHTLKDTQHTVKDTQHTVKDTQHTVKDTQHTLKDTQHTVKDTQQSLKNLYHMVS
LNNRADNL
>Cuni_T010338-R1  Name:"Similar to DCAF11 DDB1- and CUL4-associated factor 11 (Bos taurus)" Cuni1024:195061-210306(-)
HLCSVYGDSDIHEALLFESGDHNFCIFSLMFSSDNKEILGGAVNGYLYVYDREANKRTLK
INAHDDDVNTVRFADESSQILYSGGDDGLCKVWDRRTLREQKPVPVGTLSGHVDGITYID
SKGDARFFISNSKDQSIKLWDIRYFSDQKGITETKKAVANQNWDYRLQQVPRKMSRPLSL
KSDSSVMTYRGHCVLKTLIRCKFSPEANTGQRYIYTGCASGNVVVYDVLTGAVESRLKGH
TACVRDVSWHPYKNIIISTS
>Cuni_T010343-R1  Name:"Similar to Trip13 Pachytene checkpoint protein 2 homolog (Mus musculus)" Cuni1024:301133-319428(+)
MDSSQIVALQNALPVSSECKVSDMKDFIVYHVEVLQCPCSTARTASIKEKVLELLHAKKT
AFGDFVIRDFQDTFLSHNVEYVALCDSEIPGVEKKVIDLTSCSLQIHVFQVHTDGAGTEE
LDDDNISAASHWLLPSADFNGLWDTLVYDDAVKLRLLNYATTTLMFSEKHVDSNVITWNR
IVLLHGPPGTGKTSLCKALAQKLSIRFSERYTHGQLVEINSHSLFSKWFSESGKLVMKMF
QKIQELIEDPETLVCVLIDEVESLTAARKSSMNGIEPSDAIRVVNALLTQLDQIKRHPNV
LILTTSNITGAIDLAFVDRADIKQYIGPPSTRAIYTIYISCLRELMKCGIISPTHQLIDI
RALEVTRFMENSATFSSLKLYNIAKNSEGLSGRTLRKLPFIAHALFLQGCPVTLESYLEA
LSVAVERQFQEQRDLMRD
>Cuni_T010334-R1  Name:"Similar to TMEM163 Transmembrane protein 163 (Homo sapiens)" Cuni1024:17191-31382(-)
TEEWNTKQITGKDKNENDTVKYDTTNTGRLRTIAIVASWVSGLFSLITGVTAIVLGQIFH
SQSLFGYGLDGVLDSLSSIVVLWRFYDSSSSTKTEARERKACIVVSILFFVSAFSLVFKS
ANAIVQNTQAADHDESMLNGRLLTVIFFSLCGVIALAIATLKVYVGWKLHSHVLIIDSII
TYVGAAISFLGILAMEMYTEDQDVWYLDAMFGLFCGTFLFLFGLKLLIQLTCCYKVKDAI
LEISPGTP
>Cuni_T010333-R1  Name:"Protein of unknown function" Cuni1024:180-487(+)
STIYSLPSTVYHLQSTIYSLPSTGYHLQSTIYSLPSTVYHLQSTIYSLPSTGYHLQSSIY
SLPSTVFHLQSTIYSLPSTVYHLQSSIYSLPSTVYHLQSTIY
>Cuni_T010344-R1  Name:"Similar to Pdcd6 Programmed cell death protein 6 (Mus musculus)" Cuni1024:329554-336780(-)
MFDRDNSGTINFQEFMSLWKYVTDWQNCFRSYDRDNSGSIDKNELKTALTGFGYRLSDRF
YDILIKKFDRQGRGTIAFDDFVQCAVVLQTLTSSFRAFDTDQDGWIQISYEQFLTLVFSL
RS
>Cuni_T010341-R1  Name:"Similar to C1QL2 Complement C1q-like protein 2 (Homo sapiens)" Cuni1024:245137-254418(-)
MFSVGSCNQTYLLLFVLVVMGVASLEAPSACPCEEKFLERIQDLERKVNEMYLDSDKLTT
KMLDTIESVDKLLASGVAGVGPLAAKQRQIVSFTVRTSKNLPYLSESEVIKFDDVLVNNG
GAYDKHTGIFTSPVSGVYLFSASILSGFNSTIETMITLNGQHDVSRIYSGAFKNRGYGSN
TVVLNLRKGDEVSVAVFYGNGNYVHGKWSTFCGTLLETY
>Cuni_T010342-R1  Name:"Similar to C1qtnf5 Complement C1q tumor necrosis factor-related protein 5 (Mus musculus)" Cuni1024:261867-268565(-)
INQRMALKTSMDSYVAELSELKVAVFGNTSRATVAPNALAAATPSVAFSSKLSYNRELKP
LDTVIFDTILTNDGNAYDPDTGKFTAVTPGTYFFHSTILSGYNTKVETAIIVNDKEIARI
YSGAHDAHGSGSNMAIVNLRTGDSVWVRLLYQGGNHVHGYYSTFSGALLRSSEP
>Cuni_T021560-R1  Name:"Similar to B3GALT1 Beta-1,3-galactosyltransferase 1 (Pongo pygmaeus)" Cuni1025:307792-308892(-)
MAGCSSFKLTVTKLVVFSLFVFLTVVLHVTSNHLFDVYAVFNKFSSSYSAETNNTHGKTF
NYRFYNETLNAIQFAPKPVSEHPFRMEEIINPHNFEFVIRPNVTCSGREVELAICVVVKG
DNHAGRSVIRRTWGSYAKDPNNKAVLLFFIGSDKTETDKLSARQSRLQKEALSFGDIVQE
NYIDSYRNLSLKTVSVLRWVNLFCPNAKYILKVDDDVYVNIPLLIKSLHDFAAQLSPPGP
FIFGYLIADNGPHRDPTSKWHTPYTVYREEKYPNFVSGTAYVMTGEAAVLSYEASLRIPL
FWLEDVYITGLCARKAKVRVYGSNLVYNGKLTASGCTFRTMASGHGYTLEEIVKIHSELS
DPNLKC
>Cuni_T021558-R1  Name:"Similar to B3GALT1 Beta-1,3-galactosyltransferase 1 (Pongo pygmaeus)" Cuni1025:244627-245829(-)
MASCSSATVSAKLLAVISLFVLLTVALQVKYTYFFGFYTILSAFGSNYSAQTNSSRGQNL
NDGLYNKTNSTRAQIFDHNLQTETNSTRGNIFEHSLQNRTNGTTLFSPKLVSEHPFLLEE
VINPHNFEYVIRPAVKCSGRDIELVIGVPITRDNHAGRSVIRRTWGSYANDTNNKAVLLF
FVGSENNKTGTGNPSATESRLQEEASTFGDIVQENYIDSYRNLSLKSMSILKWVNKFCLN
TKYILKVDDDMYVNIPFLMELLQEFVTKSSTPDAFIIGCLIPNSGPIRHKISKWYTSEAL
YKQDKYPNFVSGTAYAMTLKAAVLSYEASLRVPLFWLEDVFITGLCARKANIPVYKSKFF
SNGKLAPSGCTFRSMATGHGYNVAEITKIHSELFDPHLKC
>Cuni_T021559-R1  Name:"Similar to B3GALT1 Beta-1,3-galactosyltransferase 1 (Pongo pygmaeus)" Cuni1025:293248-294241(-)
IYAVFNKVNSTYSAKTSNTYGQNVNYSPHNETLQTTHFSTKLVTKDTFRTEKVINPHNFE
FVIRPNVTCFGLQIELAICVAITSDNHAGRSVIRRTWGSYAKDPNNKAVLLFFIGSDKTE
TDKLSARQSRLQKEALTFGDIVQENYIDSYRNLSLKTVSVLRWVNSFCPNAKYILKLDDD
VYVNIPLLMKSLHDFAAQLSPPGPFFFGYLIADDSPHRDPTSKWHTPYTVYREEKYPNFV
SGTAYVMTGEAAVLSYEASLRIPLFWLEDVYITGLCARKAQVPVYGSNLFYNVKLAATGC
TFRTMASGHGYTPEEIVKIHSELSDPNLKC
>Cuni_T012720-R1  Name:"Similar to PDCL3 Phosducin-like protein 3 (Pongo abelii)" Cuni1026:259149-262534(-)
RQRLEELKAAQMKARFGEVTEISKADYVTEVTNAGEGVWVVLHVYKDGIPLCKLVNNYLQ
NLARKFPQTKFLRSVSSVCIPNYPDKNLPTIFVYFEGDLKKQWIGPFALGGMNLKQDELE
WMLAQAGAIPSDIEKPERPEIHDVMTSAIRQSRIDNIDDSDDD
>Cuni_T012717-R1  Name:"Similar to EXOC3 Exocyst complex component 3 (Homo sapiens)" Cuni1026:140745-184314(+)
MSGSFDDEEDPEHSQGPAPAPLDLGRLERPDQLEKVDQYKRRVARKKASVEAMLKTAVQS
QLDGVRTGLNQLQSALQDVYQIKQSLDEIEENYRIIEPLHSKLKSLKEENSRFCQLSAAQ
ENLRHIFTVPESVSKTRELIMEGKLLQAHKHLSDLEVSRDDLLLALHRQPNQSPTDKNTL
THYFSEVETLSKDLGKQLWVIIQRTLLSVRREPTMICTALRIIEREERMDSAWSRKYDQT
GFLPPGRPKKWRERCFEVLQNSIAGRIEGSQLETRDQNKMWLVRHLEITRQLMIDDLKVV
KTLLPPVFPPDYDVVRRYTKMYHRALSAHLQELIDQKLEGNEIVSLLQWIGAYDSPELMR
HPELNIDVKELGPLLENNFIVHLRNQYLKNMKQNIAEWSRNTLRTDMKDWIKDEPPDQDG
DGFFNTQLPVIIFQMMEQNLQVANIIGQDLVKKVLELFAEELNRFAQEYFIELQGFEERH
LADRKEPKYFVHYVIANANNCLAFGEYMKELRKRYIKSDYEEEIADDTEQIRKDPFQQLT
DRFLQLAKFCCDIILEELFIDLRESNCLNDLMTRNWMANSNGVETIIATWADYHRDFLHL
KPTMYEILLAKGQRRVIKEYLKALLSRKLSFKNYEERKASAEKICAEAEQIKHQFIDMCG
KL
>Cuni_T012715-R1  Name:"Similar to KICSTOR complex protein C12orf66 homolog (Xenopus laevis)" Cuni1026:30114-52004(+)
MSSQDSVTTQLSSPGVPHEESILDNYFELLSQNHCDKAKELVDSEKDGHKFSYAAYWGET
LQCLSQLATAEKNYSHLVFLSQKRFTQIVRTKDSAKSIYSMLLQEFQRMENSFAPSLSRS
IDAESEQLLAHINGQLCYFVRARIRLIEFYEQLAGLGANRQAVNFEDLVVVCEEIQNEYI
REFHHPLVSPLRAVCSFECDILCHLLRAQVLMSTWSYLPCVVQLYHAHSKLNSWSDMIPM
KEVKTAFGRSTGKISPLPPLYNWLFKLKGFLLSKFGFYFYDTLAKQTVPAELKVALSKCP
EDFVGKVQAFQKKSDASDVYLVLNAHGLTGHVREGGYHHPDKYAEPLKGMETYLPIFSYP
HERVINVLHWPNIVMLINTDSEADKVRFFYEKLTERRPHSSYFIVRADSRISLVVVFECK
KNEKDSSINSFMSDMATQLRCQNVMAGIKSFARS
>Cuni_T012718-R1  Name:"Protein of unknown function" Cuni1026:198086-219423(-)
MQTEILSHISALFSGKGLRRFEAVITRIDSSDIPGKKGLFSEKFKDRTKSDDDDDDTVVK
DSKQDERRGARGINLMKIANMDFKFQQRFVFRPLSTVPLPEPYSRCSKSYPSKTVGNQGF
QRPAHHPPPPPLPADLPPSPTEELTICLPTRALPLQPKPANTPAFTSAANSVVNGTTPPQ
NDNFQQSLYNDIPDDDLNLPPPPSRRLPPPPPSRTKATPIVPAPISSVGGLKSPKLKGLS
HLQLPKIPATDTDLTNNINSFPSTSPFIPPPPPLPPPPITSVAAQTTINHIPVNGLPKKN
VANAYLGTSNETQPAVKEMKSYKQLPQLPNKPTKLTPPSSSQKQPLPPRPVSPLPSPQSS
ALSLSPSPMLDFSSHTKHPNKSRPLPTIPSVQAGKKGTPSKANGGWGGVEVFDPREEDGD
IYDTMDSTDM
>Cuni_T012719-R1  Name:"Similar to Lrrd1 Leucine-rich repeat and death domain-containing protein 1 (Mus musculus)" Cuni1026:250316-256118(+)
MLLFGDTVFVLCLGLASLSTIMTERCVYNVGGCDCLPGQVKCVNLEEIPPLSTGTDVTNV
SSVTFIMGSFTSVDIHSLPPGLADLEFAFIPLMNISDDAFDNSAKTLTHLQISYCYMSSL
PKALLRLTSLRTLRISDTNTDVWDTDILQHIAKTVTDLQLQDVVFLEWPVWFSYFQSLTT
AALSLEHFDSLPDDAFNSTSSIEELKLTEWNFTHTPAALSTLKNLTDLQISGTTRNSIDG
TLGMDKLALFPLATTLQNLTVSYMGLTEIPDFSYMTHLLKLELHRNNISVFPANRLPLSL
EYLSLAYNYVTSVTVDFPLIINLLSLTLSANKISEVNFDMFPKNLVYLDLQSNSINKITG
GNSTQYLHLNTLILNYNPIKEISPSAFRDLVNLTKLQMDNTGLTSFPLALTSLEKLSTLS
LGDNTLLCSSPPSHEIMAWYHVYGSHISIYANCPNVGRISQYLTFGLPTTTCTTCTSTTI
LSSKAAALESCLLYGYFCLFLFLSSMVH
>Cuni_T012716-R1  Name:"Similar to CHIT1 Chitotriosidase-1 (Homo sapiens)" Cuni1026:60020-99261(-)
DILFKAYLFQLCATSARHGQKQMFCYYGSESQYRQYPGRFMPSNIDVSLCTHIIFAFVNV
EDNQLVPQNWNDLGNQGLYAQVVALKTRNPSLKVLLAVGGWVAGYEPFYNANAVTYIRAA
RMDGLDMDWEFPGSRGSPPEDKYQFTKLMKTIYYTFDKEARESKRERLLLTLATAVGTFY
ISTAYESTEIHKYVDYMLLMTYNFHGGWDNQTAHHSTIFPSKFDEGISQRLCQTWAVNYW
LSAGVPKSKIILGMTTYGMSFTLDDARVNGLNASSTGGGDGGRYTRQEGTLAYYEICENI
QRYSWSRVWVQEQDVPYATWSNQWVGYDDVTSLKIKADLLINGMGLGGAFVWSLELDDFN
GYCGTGNYPLLRTINDVIRPRSGLQPRRIPRDEIPLPRPQFQSRTCQELGAGTHADPRNC
RWWIDCVRTYDGFIQYTRRCSSGLAYDDNIKTCALSSFCA
>Cuni_T016875-R1  Name:"Similar to MRPS10 28S ribosomal protein S10, mitochondrial (Homo sapiens)" Cuni1027:57756-64647(+)
MQMISSTLNLQYLKPACTFSLNVHNLATPNKDELYRQLTIEVKGHDKAILNSYQKFTAMA
AEELDVNITKIYEPPKAIARMSLMKSVFVHKKHFHQYEMRTLYRVFEIKNITGSTADTFL
EYIQRNLPEGMAMKVTKHQIEKFPEHIKPPSTSAKSDNVAQSLEEGSPKSTEDAKFDQNT
SKPIEATESVTDTNIVEPTTASTGIVHSSKMAKPKKHSKKSSDVKSGSADAPTDSSDTIK
SKTKRDQKSGNPADIDS
>Cuni_T016874-R1  Name:"Similar to Hhat Protein-cysteine N-palmitoyltransferase HHAT (Mus musculus)" Cuni1027:31304-45795(-)
MFVDILPWWERCTYWILAVSGVAYSVYILFLEGDKYKKSLVNASLSPGWNWLGRDQDLSD
TEWYIWRSILKQSILLNAIHILLSQACFYFKASAKLHSCILLICDLTAAYIYFNERVVVL
LVTAALVMYVVSLLRRKSLVWVTAVALVSSLNYDIIYQMQVKYLQFLNYEQEFKFNVTSA
FVYIRLVSFAIEKIKYTKSQTTPSFVQAQINSKPEEELNSYNTVAENKVKRIADSCKKRK
TSVSNTDPSSIRETNPCLLDFDPSLIDLLLYSFYLPTFLDGPIFIYSDFHKQINNSFRSK
TFIPNTKDIIKQLIRIAFWALFIEFQLHFLYYSALALHPLMISRLPIWAVAAIGYCQGQF
FMVKYLVLYGTAVQLSRFDGLSSIAMPRCISWVYSFTDMWKHFDAGLYSFIKMYIYIPLG
GSRAGLLRQIFASGVAFLFIFYWHGAREEIFIWCFGNYLMCIVEAAVAVVKQSIIGTRLI
SILSPAMCLRLKAITICPVYFASILQVMFFFFQGEVGRIFMARLLTKANWTNLLAELVFF
TAGIHNALYIARRYEHKNQKLNRDQYKKVKEHDILSNA
>Cuni_T016877-R1  Name:"Similar to MJ0577 Universal stress protein MJ0577 (Methanocaldococcus jannaschii (strain ATCC 43067 / DSM 2661 / JAL-1 / JCM 10045 / NBRC 100440))" Cuni1027:242865-245285(+)
IPDAKFAHPQGKEQWHEIVKYAEKVGAGLIVIGSRGQGKLKRTFMGSVSDSVLHHSPVPV
LVCRKKEDNPIQPSH
>Cuni_T016878-R1  Name:"Protein of unknown function" Cuni1027:272749-345910(-)
MAVDARKDMSQFRAIVLIAVDESDPAEFAFNWYRDYIHKPEYFTVLLHCTDQNDQEIRDA
>Cuni_T016873-R1  Name:"Similar to ADRA1A Alpha-1A adrenergic receptor (Homo sapiens)" Cuni1027:21218-22279(-)
MTTSDSHIATFIYTDSVMMLRQDLISDELFFTIMFINMGIICQTISLLGTIANIINTTVF
IKQGLSDATNICLLALTISDLCSLITIMWTNVCYTPAFRDSEVFLISYEVQLISGIWPHV
IFTRTTGWITAFISLQRCVCVILPLKVKIIFTTRRHIISMAAIYVVTLGLAAFAYFSLGL
GWKFDPLKNHTAIGLIYYMDPARRTIVDQISYGINGVFMPISCFLSVVTCTVILVAKLNQ
QAAWRNASAAGNYQAKESSSNESSMASRDKKASKMIILISSMFISCFIPAVCVFIGGCVE
PGFTYDGEYKNIFLVTLSVSFITESINASSTVIIYFTASTKYRNTFRDIFKLK
>Cuni_T016876-R1  Name:"Similar to lark RNA-binding protein lark (Drosophila melanogaster)" Cuni1027:78406-84541(+)
MPATKLYVGNLPEDTDKTELEEAFKKFGSIVEFDILKDYGFVHFENETEAKAAVEAMDGF
QHHGKNIRVEISRSKVRQKAGMGGKGECYRCGGEGHWSKECPRGPSRGSGRDRRDRYNPY
ERDPYYPYPYDYYARARLLPPLPYDRYRYDAYERSRLPPLPPPRDPLYRDFGRESADYYR
RPSPPRDPYYDYYERRRLAELDSYADTLGGSAAAASGGQNDMKSLSRASMQGRIPGPY
>Cuni_T016872-R1  Name:"Protein of unknown function" Cuni1027:11313-12383(-)
MNTVAPQINIVNYTRVLIVPQMDLISDEMFFMIMFINMGIICQTISLLGTIANIINITIF
IKQGLSDATNICLLALAVSDLCSLITIMWTNVCYTPSFKDSNVFLISYEVQLITGIWPHI
IFTRTTGWITAFICLQRCVCVILPLKVRNIFTTRRHILFMVTIYVITLGLSAFAYFSLGI
GWKFDLARNQTLVGLIYYMDPARRKIVDQISYGINGVFIPITAFLLVVICTVILVIKLNQ
QAAWRTASSSVNHQTKDSSSNESNMSARDKRVSKMIILISSMFITCFIPAVCAFIGGCIE
PELTYDGGYKNLFLATLSVSFITEAINSSSNIFIYFSVSTKYRNTFRDIFKLNKSV
>Cuni_T006533-R1  Name:"Similar to ctnA Countin-1 (Dictyostelium discoideum)" Cuni1028:211487-218442(+)
MGKRKAFITICAVLFSILTVSCSLPGVQKSLRFQGQQSHRPVASKTLRADLCPLCIQFTD
EALDVLLNIILNSGIVGSCGVLCNALEQKTGSKVIGAVCNILCDIAGIKEFIKIIEQADL
DPIYFCELLKVCAVFDGGDATITKIIVSPQTGPQEICNGECGSKHPHSKVNDHKETNFTI
TG
>Cuni_T006529-R1  Name:"Similar to Lyplal1 Lysophospholipase-like protein 1 (Mus musculus)" Cuni1028:136032-144868(+)
MLKAFRSVISEPTSGRWTGSFVFMHGSGGTGHDLQDDIKEGLHHDFNFSHIRVIFPTAPL
QPYRLLGGALSNVWFDRSSLSPRGTECLSSINQMALQLKKMVQEEVDAGVPENRIVIGGF
SMGASMALHLGLRFLPNVAGIVSSSTFLYNTSEIYTVLENEKSIRRPPVLMCHGDQDELI
DLHWGKQTYKRLSELGADATFKTMPGLGHSLNSQVLDIVRSWVMEKVPDS
>Cuni_T006528-R1  Name:"Similar to Ttll5 Tubulin polyglutamylase TTLL5 (Mus musculus)" Cuni1028:109524-133121(-)
MAAVRESRGPDSDGNGSLTPSEQSDNDDRSEHDSDYETEDEDERLEPRGKALNIQWTGYG
KRVPVILFNAETILNRRTDFKTVGERYHLAFKFASTDCKIVRNILLSHGFHEVHPNSTEY
NLIWSNSHLKPFTLRTMSEFQKINHFPRSYELTRKDRLFKNIQRMQQTKGYKHFDFIPQS
FVLPGDYQDFCSTYIKDKGPYIVKPVASSRGRGVFLINHPDQVPLDENVIVSKYISSPLV
IDGFKFDMRIYVAVTSYDPLVIYLYEEGLTRFATVKYEKNMKHMRNQCMHLTNYSVNKRS
QDYVKNDDPDVEDYGNKWSMGAMLRYLRSEGKDTAALMMRIEDVVIKTILSVESSVATAC
KMFQPFRGNCFELYGFDILLDETLKPWVLEVNLSPSLACDSPLDLKIKSNMLCDLLSLAG
VICHDPLMRSRQQVSKQAAEITVKLKSKLK
>Cuni_T006538-R1  Name:"Similar to rpl8 60S ribosomal protein L8 (Xenopus tropicalis)" Cuni1028:389890-398446(+)
MGRVIRSQRKGPGSVFKAHTKNRKGKAALRAVDYAERHGYIKGVIRDIVHDPGRGAPLAK
VQFRDPYKYRMLTETFLAVEGMHTGQFIYCGRKANLQIGNILPIGMMPEGTIVCCLEEKN
GDRGKLARTSGNYATVISHNPETKKSRVKLPSGTKKVVSSANRAMIGIVAGGGRIDKPIL
KAGRAYHKYKAKRNCWPKVRGVAMNPVEHPHGGGNHQHIGKASTVRRDASAGRKVGLIAA
RRTGRLRGTKQVTSKEKE
>Cuni_T006530-R1  Name:"Similar to SF3B2 Splicing factor 3B subunit 2 (Homo sapiens)" Cuni1028:153936-169847(-)
YVQEQLELDPNDMNYHTFAKIFEAFKITEPEKPKEVKAEPKEEKKDDVPIKAKGLIDDDE
DDEVTILKNSDVSSFASFEKTQFAMRLATTLLWQFLCLVTRPDVVEMHDVTARDPRLLVH
LKAARNSVPVPRHWCYKRKYLQGKRGIEKPPFELPDFIKATGIEEMRAALQEKEDQKTLK
SKMREKVRPKMGKIDIDYQKLHDAFFRFQTKPKMTIHGDLYYEKKPGNLSDDLKLALGMP
VGALYKEKVPPPWLIAMQRYGPPPSYPNLKIPGLNAPIPEGCMFGYHAGGWGKPPVDEHG
KPLYGDVFGTQGSDFKNEVEEEEIDQSQWGELESESESEEESEESEEEEKDDTGLITPAE
GLMTPGGITSVPVGMETPDQIELRKRRIEDAMDQGGDTPALYQVLPEKKAAPVGAAMMGS
AHVYDISAIQKKPGDKGAAETVEVSLNPEELDLDTAAMQAKYEQTVREQQSQLEKEDLSD
MVAAHAAKQRKRKKAQQDTGKGSKKYKDFKF
>Cuni_T006532-R1  Name:"Similar to mRpL11 39S ribosomal protein L11, mitochondrial (Drosophila melanogaster)" Cuni1028:200016-207259(-)
MAARKAVAQVADKVKRKTFLSTVIPAGKATPAPPLGPELGQMQIQIAAFCKDFNEKTSHI
KTGIPMRAEISVNPNRTYNITLLNPPTSYFLMQAAGCQKGATSSNTQTAGIITLKHVYEI
AKIKGRDPAFTCMTLDQVCKTIIGCAHSIGIKVVRGPIEVAELKEFLARRAEEVAAEEKE
LEELRLSKVLRL
>Cuni_T006531-R1  Name:"Similar to PF10_0343 S-antigen protein (Plasmodium falciparum (isolate 3D7))" Cuni1028:172192-180368(-)
KDELAWKSAMQQQHQMLEQQGRQQHMHGGPGMPPSHQVDIEKQREAQQKLMEQQQLALLE
AQRGEQHQRMMPPGQGQAMNPSGVPPAGPIRGAGPMQPQPGQGMRPPGMGRPGNMGGPPP
PQMMGGGGPQGQMHGPPSMMQGGHPQMSQGGPMSHGGHPQMSQGGPPQMSQGGPPQMSHG
GPQMSHGGPQMPHGVPPPMSHGGPPHMSHGGPQQMSHGGPPHMSHGGPPHMSHGGPQQMQ
QHGGPPQMQHGGPPQMQHGGPPQMQHGGPPQMQHGGPPHMQHGGPPQMQHGGPPQMMMQG
GPPGNMGDRQSGAPPQMPSDMGERPPMSQGGPMMNSQGGPPQRMPQGMRPGMPNKEMGPR
GAGDGLGPSADGGGPQGSGDGPGPRVSRAPYNGPSTPVGPRDAKPSILPSPQHVREGPKE
MKLPQALEKMLEFKSQRAHEIGIDLDNLENKD
>Cuni_T006536-R1  Name:"Protein of unknown function" Cuni1028:282537-286551(+)
MEESRMESKCNNDPWAPLHGEGLASSQLLIAQAPENPLNQMIESERYIQTLERRLAQLSK
GKQGEPSSKDIITSLALFHDDQMRRYISQTDIIDFGLASCSGSDEMPQTSFVQRKLRPEK
QPLNPEELAELVKEDVLAKVFEESVSSTAIETVSNALDAQTYSSHVSEPSANPADLNCTP
TADGTHKLIDQQFDIKAATESADENWANFDEFV
>Cuni_T006527-R1  Name:"Similar to TTLL5 Tubulin polyglutamylase TTLL5 (Chlorocebus aethiops)" Cuni1028:69758-99253(-)
HKGILPSKSPGSGVLAPSRSKNGIQLQVAGSGRVDQEKFIESYAQALLRAKQYERRLGQV
KKSHRRKHSSKSKRGKLMQGVPEAEDGDFGSDEDGGNERVKEKKAREAKAEIREKAEAKS
AGKQGASLKAPHMSGKELAQSGLKDKDAERGLDEAGAVGEPHQISSPNLPFSVSKYDVIG
LLEKGHVLSKVQARTAFAMYLIRVQQRLLSDCGTVLQQGDIDALNEQMDLVLRFLKRAAA
NLHQIFRVVVPSKRLPLGDRRRILARQLGDFVQLYNKETDTMKAIKVRGKLENRRPKLSD
SCEGLDEIQFDQFVYTASEGELEEVLTTYTKINKSAAIFLGGDSKSSVLEAKKDSLIRRR
EYMDSTENAVSVGSIDGVNRVRHDSMGPSLSGINNNNNKALNSDVSKISVRPGSAQLHTP
SSHSYSTAVAIYTQKLRRPQSASNSAGASLAAHTTDNRPASSSGNFPLVLAQNPVFTTLD
PIVDTYNEKAIQDALQRLALRQQARQYSVVNGTSVLRPETVTSRPPSGTGSTASADKDSK
ISMAGHSVDQVCVMADEHLAHSLTRNTSNGTINLAWKPPHPLVKTHKQSRPQSTLMATSA
SNFVEDPSLRQQNGVANAHSEVTRVIPQNHHITSFSNRQFQIAQQAAVKQRLMHQSKAML
EVSKAKHEASLSQAQVQQSSSSLETPSSLHSEDLIQDTFITIPDNLHSLKTLVPKPPEQV
SYTQHRNNFRSNRKPTVGENNLNFHFHSNLLAAGQDTQS
>Cuni_T006526-R1  Name:"Similar to DDB_G0287407 TPR repeat-containing protein DDB_G0287407 (Dictyostelium discoideum)" Cuni1028:21837-49986(-)
MENEREELTRKYFPRLHHACNACGIQFVPVDMRWGITSEAAANAQVINICLREIDRSDVF
IGFFGQRYGWHGESDDLLQRNFDNAVGRYPWLADYRDRSVTELEFLHGHLLHPSQLPASL
CFRDKAYDDAMKDKAEAEGDLKSALKYTAESEHSMKLMADLIERVKATESQVMILCFFEQ
QWKYSGLLFQGAKFMFESVWKYCQELLATSDSEETSLLQQNRLCHDAYLASRTTLYLGGD
SYLQKLSPVKMKEHPNVLVHGPAGCGKSALLANLVKQLQDSENQVNFIYHFVGCAQGTTD
PKSIMQRILAELQFINGTEVNRDLGAEHKQSVIDKVYNNEFHDIYVNVQNEMQHASSDGK
QVVIIIDGLNRVTASSKTAKHLYWLPEKFPCGISLIVSCVTSNTETFDLLVNQRKFYDLE
VQSLPGDIKTEICKKTLLVNGKELSPQQLQRVVKAEQTQNPLFLKIVLSEISIYGYFRFL
DKKIDSLIYSNGVKDLLSKVLQRLEEDYNVQDHAELLVQQVLSAIAVSHQGLSETELLDM
FHIESHVWSPFYFAVEFFLINDAGLLRYVSIHISF
>Cuni_T006534-R1  Name:"Similar to HPGD 15-hydroxyprostaglandin dehydrogenase [NAD(+)] (Macaca fascicularis)" Cuni1028:230546-250153(+)
MELSGKVVFITGGAQGLGKAYTEALLEKGAQVFFGDVNAVMGAETLKELQEKYGAKNVRF
AAFDVTNHQQFQDAFTQAVSEFGHIDIMVNNAGIMNEGSWQLMININVTSVVFGTQLAIE
HMRKDQGGRGGRIINISSIAGLKDLPTLPVYCATKHAVRSYTSSLALQYDLAALGVEFGI
LCPEAAATDLILKLDSDKIHFFDKVKETIEENTMPVSTVVDAFLELVQLEKMNNAILLVQ
KDGKTYQKMEYHQVSPPGPSKDNSPTQSH
>Cuni_T006537-R1  Name:"Similar to Hpgd 15-hydroxyprostaglandin dehydrogenase [NAD(+)] (Mus musculus)" Cuni1028:299059-316067(-)
MDLSGKVVFITGAAQGLGKAYAESLLQLGAKVALGDVNAALGAATSEELQRRFGEESVIF
YAFDVTDHQQFRDAFNAAVSHFGHIDVLVNNAGIMDESKWELMIQINYTSLVFGTRLAIE
HMRKDTGGLGGRIINISSMAGLEDYYFIPVYCGTKHAVRAYTSSLAQQPNIEEQGIEFGV
LCPDAAATELVSKIDENRILFFDEAQPRFEKSKMDVETVVDAFLELAQLEQMNGAILLVS
LEGKTYRKMESLVYV
>Cuni_T006535-R1  Name:"Similar to Hpgd 15-hydroxyprostaglandin dehydrogenase [NAD(+)] (Mus musculus)" Cuni1028:260705-276338(+)
MQISGKVVFITGAAQGLGKAYAEALLEHGAKVAFGDVNAALGTATYQEFQRRFGEENVAF
FVFDVTDHNQFRDAFNAAVSIFGHVDVFVNNAGIMDESKWELMIRINYTAVVFGTRLAIE
HMRKDKGGRGGRIINISSRVALFENIYVPVYCGTKHAVRSYTSSLSQQPNMEELGVEFAT
FCPGGTVTELMLNSENKVQFFDEFKRIHLDNLLETSIVVNAFMELVQLEKMNGAILLIAL
EQGKYYRKMQNVVCA
>Cuni_T009771-R1  Name:"Similar to numb Protein numb (Drosophila melanogaster)" Cuni1029:155020-187106(+)
METKGGNRFDRYRTIMQSLRKRLSFRKKKDHVPECSKPHQWQEDEKKVREGTCSFQVRYL
GYIEVFDSRGMHICEEAVKTLKSQCKGKYQRAVLYVSGDALRVVDEISKSMIVDQTIEKV
SFCAPDRNHEKGFAYICRDGTTRRWMCHGFLAVKESGERLSHAVGCAFAICLEKKQKRDK
ETGVTVTYNQSRTSFERTGSFRQTTMTERIVDPQSAILA
>Cuni_T009768-R1  Name:"Similar to SART1 U4/U6.U5 tri-snRNP-associated protein 1 (Homo sapiens)" Cuni1029:32456-71001(+)
MGSSKKHKEKDREGKKKRKHRSKSRSRSRERKRRHRDRSRSKSPGNDRGRETYEASYKDS
GFSDDPRAISIDYNHAYVNERNRDQRPPEPREDSQPAQNSGERLSLSIEETNRLRAKLGL
KPLDGTAAKGDDSKGKKQDAVHAPPVNLAQQRKTEVLREKMATKKSQREVEKRLQRIKGL
GESESDDEGAAAWVSKNRQLQAQRELAEKTAKMLEEMDEDFGIKGLVEQEFKKDEKKHNY
SSYDLRGLTVEHGLEKFSEGRDVILTIKDKGVLDEDESDVLVNVNIEDDERAEKNVDNKK
KKVDYKPYDEPQFDEYGMMKPAAMLSKYDEEIDGVKKESFTLGSGGVYDAAHEKRMIEIR
QQLRAQGQTLDTPGLTLATEYMTKEEMEAAKFKKTKKKVRKIRKKDILKADDLLPLPEES
TVQDYGSRMRGKGRFHAEVEDEMSNDGDKKEQIKTEETNPVVVEDVTTEPTFKIEVDDDD
IIGPDEDLSGVAVKEDEAQNELQGMLAKARKIKLKKERVSSRQIIEQIQPGTENSSLQNQ
TASNIILNCTSEFCRNLGEIPTYGLAGNREEDRGELMDMELELMEQRRKQEDLEEATGGW
NAVDIDDKPVDIRVDEAVVLEEEPISSEGVVAALMLAQKKGYLEAEAPKKLPALSLKALE
LQAQNYTIQDKRYDDLDEKNRKRDRYQGGMITEFKEKDSYKPEVKLDYVDDSGRALSAKE
AFRQLSHRFHGKGSGKKKTEKRSKKVEEELLMKRMSSTDTPLNTLSLLKDKQKSEKSPYI
VLSGSKGFTSNNIVKPT
>Cuni_T009767-R1  Name:"Similar to yif1b-a Protein YIF1B-A (Xenopus laevis)" Cuni1029:4806-22454(-)
MDIPPDYIPEKSSQKRRPKAAKGQQHQQNFYNDFDMPNQQSQQFAPNFGQQDMFYGGQGS
QVFSPAGYGGQMPNFQQFPGQQLLSDPVTNMAMQYGQVLAGQGKDLVNQNIQQYVASSKL
KNYFAVDTIYVGKKLGILLFPFTHTDWSVHHSQDEPVAPRYEINAPDLYIPMMAFVTYLL
VAGMVLGTQGRFTPEQLGVQASSALVWLIVELLAFSLSLYILNLTTSLRYLDIISYCGYK
FVGMTISLLAGVAMSTSVYYGVLAWFCITLAFFLIRTMKVQVTPQQREDGYSKGAKRSLY
FVLAVSLAQPLLMWWLTSYIMLS
>Cuni_T009770-R1  Name:"Similar to AP4S1 AP-4 complex subunit sigma-1 (Bos taurus)" Cuni1029:106872-115884(-)
MIQFILIVNKQGRVRIRRNYHHVEKNEQEQRDSAVINKCLTRTNKQCNYFSHEAVTIVYK
RFTNLCLICGVTNENELAIQELLNVFMDCLGSYFQNVSELDIVYNMERVYMILDEIIVNG
SIAFTSKERALIPLQLLDAGS
>Cuni_T009774-R1  Name:"Similar to cwf19l2 CWF19-like protein 2 (Xenopus tropicalis)" Cuni1029:292629-321106(+)
QWVEAQAKTKTVSASAIRGPQLQRESWMESPLDLIPTTSKQELRDAINKQKEDAKKEAEK
LLEPGRNARELNPYWKDGGTGMPEENPDKHKQNRSSVLLASAAGDGGLSWLRKAYDRCKQ
QALDEGRSLEEVAAERWGSLKKLESMIREAERHQKGGGRLESWRDTRSDDRRGEKGNYKQ
KDDMLNGAKDNRDGRESREKESNRQWEKSKEGDRGELQGSISERNRDRSGYKGSRNDKDE
DANRLKKADKLQKTNFQRPCSGSDSDTTPRRSGRNKDRSGYKGSSSDKDQDANRPKKADQ
LQKTSFQRPYSGSESDSSPQRSERNRDSHSYKGSNSDKDQDANRPKKADQLQKTSFQRPY
SGSESDSSPQRSERNRDSHGYKGSNSDKDQNAKTLRKAHFYSNRHHSNESRTRHSQPDGK
QQEQDRNSSSSLPRWKRKTEFVANRNEEKNERKKKTEGKQSSGSKSRSNHKRSNSSSDSE
NNDSSKDEEQNEPTQITPARVLSEEELNELAAKILRAEIMGDDATAADLKLQLENARKAR
DASKSESGALAPDFSHRRRDEAGKIRGGRKRKEEEEDNVVVLSRTSKGGLVRPVVGASDD
SRAAGGKRKKNVVTHDSKGERTIYFDNDDKLDLKTMVEQEKAGTAEDQNAMFARLAGRSN
DRDLDVDDMFVSKAARKQNEEQAVARDRNAAIFEHKKLNASMENCHRCFSKVSKHLIIAI
GTKSYLCLPHHRSLTDGHCFIVPMQHVSAATSMDEDVWQEIQLFRKSLVQMFAAKGEDMV
IMETVKNLKHFPHTAIECVPLDKELGDLAPIYFKKAVQEAGPEWSDNKKLHSLSNKDVRH
VIPKGFPYFSVDFGLQGGYATVIEDESRFPAYFGREIVGGMLDAEPTLWRKPHNESFEDQ
RKKVLQFAQKWKPYDWTQTLVAGE
>Cuni_T009773-R1  Name:"Similar to CWF19L2 CWF19-like protein 2 (Homo sapiens)" Cuni1029:282685-285105(+)
MYSNFQSQSELDARKEEIRRQRKLVIEQAKKSYERTEAKKEKAHKEGQDTWMLDSVSQRI
RQEEK
>Cuni_T009772-R1  Name:"Similar to ARPIN Arpin (Bos taurus)" Cuni1029:265032-275815(+)
MSRLYDNKPLANLPVQNVQWNGIWNHNDWTTAKKEQSGVIFEGKVLSQARISIASKPESA
APKARYYLLFMKITKAHKRKFGADGAEIEPNFSETTKVSTGYLNSSYDVKAKGKTDKLST
DEVKALIEKKNVSSMIAEIVEKSSEADVTLLMREEDRDKLELFNDVPVRVKTAGNNPFVE
SLVLKDDGMSATAGNFVGDETVGSNWTDKIMAVKSSLGNQGSTDKSEIADDEWDD
>Cuni_T009769-R1  Name:"Similar to KLHDC3 Kelch domain-containing protein 3 (Bos taurus)" Cuni1029:78505-96480(+)
MPAWTVRLEGGPKRVNHAAVAIYNRIFSFGGYCTGEDYEMTRPMDVHVLNTVTLRWTLLP
LPSTAKDISNTPFQRYGHTAVEYENNAYIWGGRNDSVGACNTLFRFNGADFKWDRPAVSG
LVPEARDGHSACVVNHNMYIYAGYEEFTDRFSNDVHCLNLQTFAWTEIIVRGKPARWRDF
HTATAIGNIMYVFGGRGDVCGDRFTNNEFYCSKVRAFDTSCNTWLPPSLFPQAAPEGRRS
HSAFEYRGLIYVFGGYNGRLECHYNDLHQLDPTTMMWCKLSVPGICPTPRRRQCACVVGS
KVYFFGGTSPRDVSERLNSPQQSESNLIDRSDLYILDLEPTLKTLTLMVIIEHKLDRSCL
PHDL
>Cuni_T004599-R1  Name:"Similar to ANO10 Anoctamin-10 (Homo sapiens)" Cuni103:757018-808062(-)
DLTNFLTMAEKQRVIFKAIESIRASEEELFIPGYPKYLLYPGKSIIKKYLSRQIVINLYP
LHDEEALKRLGSEWYTLKNYFRKQPLDKIQEYFGVKIALYFSFLGAYTISLIPPAVLGVI
YFIYPGCNVYREATFAMFNLIWSTVFLEGWKRYCSSLCYKWGTIDSSISFAKSFEEPRAD
YYGAMGHNLVTGNPEPVYPKWKRVLKFYLVTVPVISSCLAVAFFVMLAYFWAEQWMKEYS
PQDWGVITTFNSLLPTVAYAVCIAVLNSLYRIVAVKLNKFENHRLGSSYENHLILKLILF
DFVNCFICLFYVAFYLQDRSLLKTFLGTLLVTQQIVGQFQEAMIPYFFMQRRQKQFDQAL
KKTEALSLSKQTGSGIYIDQVYKRQASLEGLMDKWN
>Cuni_T004588-R1  Name:"Similar to CBFB Core-binding factor subunit beta (Homo sapiens)" Cuni103:248639-262907(-)
MKQHVTFSCRPEMNERLSDSMLSLVANTLFCELKEKFTFAMPRVVPDQRATFENDELFRK
LSRESEVRYTGFRDRPMEERQIRFQAETREGHADIAFVCTGTNLQLNFVRDAWSERAEDR
IATPEFVNFDLEPGKVHLKSQFILNGVCVVWRGWVDLERLDGIGCLEFDEERAE
>Cuni_T004593-R1  Name:"Similar to MTG2 Mitochondrial ribosome-associated GTPase 2 (Pongo abelii)" Cuni103:548819-571968(+)
MIAYCGFKTIFASLASASVVLPRTVLYEGVFCTACYHTVAKPVKPKKFKGVTYRKVRHFV
DYMQLEVCGGKGGNGMLSFLSLPCREWAGPDGGNGGNGGHVIFKAAVGTKSLAHLKSVEK
AEDGLKGRTKHRDGRNAPHHILEVPLGTVVRSPEGKILSSLDKEGDLFIAARGGAGGKGN
HFFLSNENRAPSAAEIGAAGVSRTLHVELKTMAHAGLIGFPNAGKSSLLRAISRAQPAVS
AYPFTTLNPHVGMILYDDYQQVAVADIPGLIPGAHKNKGLGISFLRHIERCLCLVYVIDL
SIDYPWEQLTHLRYELNQYQDGLADRPSLLVGNKIDIPGAVEKLEELKCFLSRETDVGIT
SCIPILGVSAKKLLGIDEFLHHLRIMYNDNVQ
>Cuni_T004591-R1  Name:"Similar to RNMT mRNA cap guanine-N7 methyltransferase (Macaca fascicularis)" Cuni103:450619-482147(+)
PQSSGDHALTVANHYNQLEETGLALRTRSRIYYLRNFNNWIKSILIANTLNKLRENETQR
SISVLDLCSGKGGDLLKWKKGRIAHVVCADIAATSVEQSEARHKQNVERERNRIYTAEFI
AADCTKERLKNKYKNPAQTFDLVSCQFSFHYCFESYSQAMMMLRNVGECLRVGGYFIGTT
LDSNELVRRFRQSQDKSFGNDVYRITFSQEDKTNFPLFGAMYNFHLEGVVDCPEFLVYFP
VLERMAAMYGLKLIKKQRFSDFFKENLHNKDNLSLLSTMQALEPYPPVEGAETVSSRDED
YQVAKDFLLSVSKSGEKEQSGRQYQQKQIGTLSQAEWEAATLYLVFVFQKVEDVCPPLDT
SSTFSTVETSSQPTSH
>Cuni_T004604-R1  Name:"Similar to dcd2B Neutral ceramidase B (Dictyostelium discoideum)" Cuni103:957544-995844(-)
WFAVHGTSMNNSNQLLSSDNKGYASQLFEQQVNGDGLPVQGSFVAAFAQSNLGDVSPNTR
GPHCLDTGLPCDKETSTCNGKNELCVAFGPGQDMFESTQIIGSNQFHEALNLYNSASFKL
SGPVDFRHSYVDMPRQNVTLPDGSKAQLCKPAMGYSFAAGTTDGPGAFDFKQGSTSGSPV
WDFVRNLIKAPTAQQVQCHSPKPILLDTGEITVPYLWQPQIVDHQIVRLGQLVIIAVPGE
LSTMAGRRMRNTVYSTLVETGWPTTTTTVIAGLANEYSSYITTFEEYQIQRYEGASTIYG
PHTLQGYLESYKWLASHLAEGTPSAPGPSPPDLLDKQLSFLPGVVFDSAPFGKDFGSVLV
DAKPSYTQGSVVTVKFVSANPRNDLKTNDTFLAVENLAGPGNWQVKYTDAHWDTRFKWIR
TSTILGHSEAEITWQIPANQMSGLYRIRHFGTRKSLFGGLATFVGQSSQFSVTGVSPRKA
FFHVLHM
>Cuni_T004598-R1  Name:"Protein of unknown function" Cuni103:735132-745232(-)
HIVLAVKASVALLIPDIPSWVTLQMAKQEFSAKQALRKQRIMEAAQKKKVLMEAFKSRST
GKCNVDSLAEHKGQ
>Cuni_T004602-R1  Name:"Protein of unknown function" Cuni103:914343-922574(+)
MPNQTSSLPTLHLATHRVCVPGNENRLCPGKKPLCPGGCKPGFCLNSQCVCNTRPEMFHC
NPQVEREAEFHRQRIESAVKQQKNLDRQAFLASERKSMGMREPDEEAKKLPTWYKTEETH
SGQTSAAAQPLEDFKCQRTMRAPARPSCMLTATEIHPAYDDLSQLSLFLRTSTMPGYGPG
GVVSEYQDTYNMAVWDGKRDLDRQLYKLKHDWLSIWGEQNVKDQRWRKGWLEKDALKK
>Cuni_T004594-R1  Name:"Similar to Cebpg CCAAT/enhancer-binding protein gamma (Mus musculus)" Cuni103:616648-617661(+)
MESLQLTELDIQSFLGTNKCELASQKLYVDSVDCSQLDILDPIHERALVFSEYMSQDVIN
PRINIYTQIPPHYSEHQSLPQVVLDATAVIHEEKYPGEGSVLPSPIVNFLEPGQSPEQSD
VTSYYSDDSCSTSRHVPEFSQLTSPGVDAPSTSFQWSRSSNIKREQYTFQQSDASYFGLK
LEEFELSSSQQSTQKGTSDVASFPFVTSSTSLPSPASTVYSVSSPGTPGTLSSTRGRRPH
GSIIPYSTKSRRRQAEKGTQEYVEKRARNNVAVRKSRAKAKEKQRETEGRVRHLLEQNEQ
LQKKVDLLTKELTVLKGLFTNIGSSIPDEFLKMVGDS
>Cuni_T004587-R1  Name:"Similar to Aktip AKT-interacting protein (Rattus norvegicus)" Cuni103:90237-129807(+)
RNVNHLWQVILYAKKAFFKINTDSPSNPEAAALYDQELDVFKNRVLESLTSSKDRLLQPP
SLDDPFALRFSPWNEAVHPDTKRQMIQSSQPDYIPHWKQSQDAGSANPCDLGLSWIEAEL
PRIFTKNESEDT
>Cuni_T004597-R1  Name:"Similar to TCAIM T-cell activation inhibitor, mitochondrial (Mus musculus)" Cuni103:682098-722602(+)
MFKSLKVTWCRRLLYNTSLCPVFKSTRHFTARDASAALKPFYFIVHPDLFGQHPAERAVN
ENSLKLLNEYLTGHASDGKNEAKEIVFYIRSQDNSEPALKQVKIYLTTSNLRETVMDILT
SSGLPSSHVPQTKCSIYGTNRPIVWHPSYYAATGRPNPQGSHHASRPAAVSLRSWLQMNI
ERSRKYEKSVKFIQDDVARLLKKLQMDLGVEDIRFDSVWGCHHFRGCLTSFDRLFDNHPE
FLQLILKGRTLVFSNSTGVSKLGEIILSSEDVPQTWITLLQSVKAYDAVLDRLPKMESKL
SSLLNSICVVRQRKQHCHVMAGEYELLLNKLLNSLRRCQDHVIHTFKNKDLSTLQLVVEG
ESSPMMLSSHGQFLIPASVPGTLAVDFVHENIHEALGILQRITRFLDEEEESKKKAIEVL
GLYQLNKDESVTPEQMISCCSRISEQHWGLSVSLENSKLRVSHYYSVMEDGQICIPWDWV
GDDG
>Cuni_T004596-R1  Name:"Similar to MRPL38 39S ribosomal protein L38, mitochondrial (Bos taurus)" Cuni103:644293-678471(-)
MALSATSRSCIRLTARSVNIQPVRFRWKPPKIEDNVFPSHAERLAEWNARYVAPASQGIN
IGFYNNHSESRSQKLDMLKKWTVKRKQLEQAARHKTLKIDLDLMKKDWMAESMPLHVKKM
ATHYGLFSDLFDGAHFHPIVPLSVSFDYDEEFITPVYYGNVIPAAETAVKPFVSYESAED
NLWTLVMTSPDGNLEDHNKELLHWLVGNIPGANIERGVTVCDYLQPFPPKGVGYLRYAFV
LYKQERELDFNQWQRPAGCLSLRERTFSNFEFYRQNEDSLTPAGLSFFQSEWDKTVTSVF
HHVLDMKEPAFEFIHPPFYHPEQLEFPHREPFNVYLDKYRDVKDIQEEVLREKLKHVDIS
KPASRQQYPCIDLLPKETPSWLKSKIQLMRQGREQWRDLFEKP
>Cuni_T004590-R1  Name:"Similar to ytcB Uncharacterized UDP-glucose epimerase YtcB (Bacillus subtilis (strain 168))" Cuni103:419420-424177(-)
MTSSSVCCPQLPAMSSKGPYINGYNYSNGDVPLCQGHILVTGGAGYIGSTLVPMLLEKGY
EVTVYDLFLWGISPLLPVAEHPRIHIVKGDILDKVKLEQVMEGKMAVIHLAAIVGYPACD
KDKVRAQEVNVEGTRNITLLKKPNQALVYASTGSCYGAVDGVCTEETEISPLSLYGSSKA
GGESLVLGVSGTALRLATVFGVSPRMRLDLLVNDLAFKALTVKHFDLYEGHFRRTFLHVR
DAARAFLFAVENTKLMSGQAYNVGDERMNLTKNEVAQVIQSHVPSCKIIPSTTGEDKDKR
DYEVSYEKIRKLGFRSTVSVDEGVRHLLKVLPNMLDSEVERSKNV
>Cuni_T004589-R1  Name:"Similar to KATNB1 Katanin p80 WD40 repeat-containing subunit B1 (Homo sapiens)" Cuni103:321956-363023(-)
IWDLNAGKLLAELTLHKGPVNTVEFHPSDLLLASGSSDKTVKFWDLESFQCISSSDQDKQ
PVRSIHFHPDGSCLFSACGDTLKVYGWEPFICHDVIPVQWSDIADIAVANSQLIAASFNK
ASVSTYVVDLTKVAPLGVASRSEHVRETLQSSSGRRSFILDPQTSSRQASEPKRADTPPD
KSDSNDDESSVSRADIQNQDDYLRFFKEHAKNPYTRDRAEPFQAPPEDEETVKASNFQPA
PVRKEISPPSAKPLLQLQKVDKASIQAEDFLPKQKAVDELSERDVVDVLGTGHNTMIAVL
EQRTRNLQLVLTMWRSGSTKTAIDSTISMKDPAVMVDILNIINTKPSLWDLDLCKLLLPQ
LRDLMGSKYESHFVTAASSVKLILRNFGDVIKVNMEEPPSSYVDITREERHKKCLDCFNV
LSSIKAMIRSAQPVATAKQASIFKEIMLLMARLE
>Cuni_T004603-R1  Name:"Protein of unknown function" Cuni103:925310-946410(-)
MAQGQLTNGQYFRKHRFAELCPPSDFQVVCHGKLIKSSRQPETFYNGWYPVRHRCSFPDH
EAVPGAGLKSEKGLQFRNYRILCDICDHPDNKLVLDKEKSCWSQLASCRNSVAPRMCEQD
VSSPAALPDVEMERAKRCSHKVDAYWRYHDPHYVASAAGLPNESRVHDSNWFSKLLWQTP
CLLKQPESQQTVSAETNHSDMGHGVDQQTWQADTFNKQQLIDKI
>Cuni_T004586-R1  Name:"Protein of unknown function" Cuni103:46959-58121(+)
MTRSIICVLSFLISQAAGSYYCLYDDGLTTDYVWCTWGCCDNGLLEPCCDQPLYAGTPFI
AGLTCGSVALVCAVIGILIYRRRRYNTTTVQYGPTVQPHVFSSTTSTSSHAGYSNPGFTS
TTQAYY
>Cuni_T004595-R1  Name:"Similar to RPL26 60S ribosomal protein L26 (Littorina littorea)" Cuni103:619598-620029(+)
MKFNKAVSGSRRKNRARHFNAPSHIRRKIMSSPLSKELRQKYNVRSMPIRKDDEVTVVRG
HYKGQQTGKVTQVYRKKFVVYIERIQREKANGATVHVGIHPSKVVIVKLKLDKDRKKILE
RKAMSRAKALAEKGKYTEETMES
>Cuni_T004592-R1  Name:"Similar to Tmem189 Plasmanylethanolamine desaturase (Mus musculus)" Cuni103:511859-547134(-)
MGVKSATEIITHSMTEEDPNKNIQYSEGELAKKPRWGPEHAGAKELASKYTAGKRFQETV
CLFVSLILLFINFIYLVIYFDPSQWHMILLCALLGIVTADFCSGLVHWGADTWGTVEIPI
VGSGFIRPFREHHIDPTAITRHDFIETNGDNFAVVIPFTGYTAYQFFCMTPQDIAETYNW
KMYIFLLSVFVSLTNQCHKWSHTYFGLPWYITLLQDMHVILPKRHHRFHHVAPHETYYCI
TTGWLNYPLEMIGFWPCVERLIEHLTGSKPRSDDMAWASKTH
>Cuni_T004600-R1  Name:"Protein of unknown function" Cuni103:820806-828337(-)
MSQEQVFEPLVVLEFGPKTNQAAQEWLTAKLQAPRTELGAELQVRTNYMDCNQERVLYIG
ADLDRLLLGAEEMSLQKFYKDGKLRDISLTDLFNYVNG
>Cuni_T004601-R1  Name:"Similar to IGFALS Insulin-like growth factor-binding protein complex acid labile subunit (Papio hamadryas)" Cuni103:842055-865042(+)
MLPRFRIVSLLCSLISSFLHSATNEAITVITISLFVFVTPSLACPLSCKCNNITVLEVSC
QNGRLLNIFTQIDNTTYSLSLDHVIDLRLITKAHFQDLKASEIVILQITSSFVKEIAGNA
FSELSHLEYLDLSGNELITIYDDTFAGLEFLTSLNLSHNQLSSLGLSLKVLPHLTMLDLS
ANNLKEIAGNAFSELSHLEYLDLSGNELITIYDDTFAGLEFLTSLNLSHNQLSSLGLSLK
VLPHLTMLDLSANNLKDLAANVFGSQNTLTFLKMDGNSLGNLQSDIFEGVHSLRELSARD
CSLVHIEHDIFLYLSALTVIDLGQNCLTSTPSLSVLSKVILRIVLLDHNEIKVLHQSIFE
GVHLKTLDLSYNRINKIDPLAFVKTTLYNLDLSYNSLISLNRNALQPLGKQLIHLNLAGN
PLHQLQTNVFEDLELLETLNLSSCSLDSLEHGHLQKLSLLRELDISHNNLYFLSQSILDL
FSKLTAVRLHENMWVCDCHIQFLRDWIALSSSSSKIQCPSDHEQHRDCRQMLCSLPSNLQ
STIIVQLKDKELGECLQEKTKTLPTSTQGVIVASCLVFAIVLLTVAIFLWRRGQTHHDLK
RLCVPSVAESSHIVDEDSKVSPLANCNRNSLTLSDHNFVFRHYFDHLVTDPKLMADEGEE
NYDSEYEPTTRKERDSLYSSQPSLYSHHSDAGYGMESTV
>Cuni_T004605-R1  Name:"Similar to dpf3 Zinc finger protein DPF3 (Danio rerio)" Cuni103:1037802-1068490(-)
MATESGESQCFPPEQRYMDILEQTASFNTRLSIERKMRLPFLDSQTGVAQKHTNLFHPYR
YRQPGTVEGQLYSYPAKRWKKKKRSLIFSERRVGLHRDIETGEADMHQISAVENPAHRLE
EHEFDHLEAADNWYDDVDDFGDPPDDGAMVDDQSDISDFEDSLKGRKRKKNTSKGRRKKN
DDHNKELLSPEDKEKPYACEVGRRKEYVPKTTKRTRSEVTASNGKVSKASAATPVAAPPP
TPTPSESKVSANNYCDFCLGDAAENKKTKVAEELVSCSDCGRSGHPSCLQFTDNMIISVK
KYPWQCIECKSCGLCGTSDNDEQLLFCDDCDRGYHMYCLNPPLSEPPEGSWSCHLCIEEF
HGGKKPAGMN
>Cuni_T004585-R1  Name:"Protein of unknown function" Cuni103:4511-31706(+)
PMRRPVCSSIIREVPAALLEGAGGFRMGHKAKWMLKIEKANILDCDVIVQVYDTFLSPKD
AKSVLTMSCASPDPGVIYINSSTLTVRLKHNNATDYTFSIIATARKVSSKPDVACQGFKC
ESGPCVAKSLICDAVDNCFDYSDESINGTAYCEAGFWPFQGENWGVLASVLGAAVVLGIT
AACCRHIRGKRRSSIDELYERNEGPYVHKYAYRYAIIRPPKKPNQTNVVLGRDGHMHYNA
TTV
>Cuni_T017125-R1  Name:"Similar to CFDP2 Craniofacial development protein 2 (Bos taurus)" Cuni1030:184637-185389(+)
MTPGILDDLQHMSDLRKTSVINNVDIVALQETQLSSSGSIKEKDFTFFWQGKPSSESMEQ
GVGFAIRNRLLGTATPPTGGSERILKIQVQTRAGPVTLISAYAPTLPPSPDSKDKFYEEL
ISTLSEVPDREALFILGDFNARVGALHSSWRSCMGHFGLGKMNENGERLLELCCLHNLCI
TNTFFDLKPQHKVSWRHPRSKHWHQLDIILTKRSHLHLVKVTRSYHSADCDTDHSLVCSK
VKLIPITTHI
>Cuni_T017126-R1  Name:"Similar to Efcab1 EF-hand calcium-binding domain-containing protein 1 (Mus musculus)" Cuni1030:272007-294480(+)
MQKWGLIIDTFSLLVTLTLKKTKDSKQNVCSYGLDYSLVDKVMTYAECLVSPGTQEISLT
TFIYEMTFRFNLTNAYLISAIFNKINNGRSNSRNSLTVEQYSRLICTFVTSDVDVKVNYV
FNVYDLDGDGFLSKHEVHTMLMTTVPQNSEEQDDMLKDLIEIVLKLVDRDGSGTIDIDEF
RDLVKKDALYIELLGQVLPDSSFTQM
>Cuni_T017123-R1  Name:"Similar to EMILIN2 EMILIN-2 (Homo sapiens)" Cuni1030:58335-74012(+)
YILASDCGCHDVWVEIDKLKGYIRRGLKQNADNKDYNTFFFISIEKCRVSFSARFAKRNG
YAIRDEEIGGAYDSSTGVFSAPCDGQYFVTASLRSHQAMDSGYVEGVIAVDKEPKARTSV
FIDAPVDNIQSATNGVVLTLRSGQKVAVVVKTTSSGEIIGEDYSVFSGFFLFP
>Cuni_T017127-R1  Name:"Similar to hsd11b1l-a Hydroxysteroid 11-beta-dehydrogenase 1-like protein A (Xenopus laevis)" Cuni1030:325981-328455(-)
MYSASKHALHGFFGSLRSQFIALKQNVVITMCTLGYIGTESAIKELQNSGSDMMLRIVNP
ASPEDTARAIVAASARRDQELYYPSVTVRATVLLRSLFPQTIDAFMRFISSANHK
>Cuni_T017124-R1  Name:"Similar to efcab1 EF-hand calcium-binding domain-containing protein 1 (Xenopus laevis)" Cuni1030:107230-146879(-)
MGTFRALQNRAAAMNQRLVEFSGLEPELVENILQYAKSLLKSSSNEIDETVFTAQMVDQF
EITSTFMVSQMAEALKKGNKNFLATSESGRQRGIPLEDFCRMVCTFLSQKLDIKINWVFG
VYDTNNDGSLSKLEMHILLKPCVLHTEDMDLDEAIRDLIEIVMSVVDVNKNGLIDLEEFR
HLVKTNILYIDLLGQVLPRDHVVKKFLQKIKNKSPNQVAMLFQNERARALTEAPLSKPPA
LYPIQLEIP
>Cuni_T017122-R1  Name:"Protein of unknown function" Cuni1030:28424-32669(+)
MFSCFLIVVCCHLGSLAIRATPRIAVEGLTEDIRLDCRPELTVKNVLMAVLIHLERLDEN
GTTTLVASKRINSLKVADNNRLVYVN
>Cuni_T020334-R1  Name:"Protein of unknown function" Cuni1031:160562-170686(-)
FLTSQLVDAVKCLPPLECRSFSGLVRGRFQSGTPPEAPFEALLQAFWGGGREGREERGEG
TSRHNGRIQETSKHNGRIQETSRHNGKVKRTFKHNKKVKGMSEHNERIQETSRHNGKV
>Cuni_T020333-R1  Name:"Similar to KCNJ5 G protein-activated inward rectifier potassium channel 4 (Homo sapiens)" Cuni1031:120822-122048(+)
MRRRLVYKNGEVNITQTNIRKRRRRYLADIFTTLVDIKWRYNLMLFAMAFTLSWLIFALI
WWLVCFSHGDLDHLDNSNWKPCVIEIKSFTSALLFSIETQHTIGYGHRHTTEECPEAIVL
MMFQSCFGVICQALMTGIVFAKLSRPKKRAETLMFSKSACICKQDGDLCLLLRVGDMRKS
QIVEAHLRAVLIKKKITKEGDVLPLYQFDVDLGFNEGRDRLFLVWPVIIVHKIDQDSPFW
ELSPEDLHREQFELIVILEGIVESTGMTTQARSSYLPGEVLWGHRFERLVTFQKENGQYQ
IDFSRFHNTVPVDTPNCSAKELAEMTASGQTPEQAFCGARPADDDDDDDDDDEVEEGENA
SLASKSDRYLKSNGPYVIKRHGAAQTEYFGDDYDSLASKQSSSSDIDM
>Cuni_T020335-R1  Name:"Similar to KCNJ2 Inward rectifier potassium channel 2 (Bos taurus)" Cuni1031:245472-261409(-)
MLALCRRRPARPVTRLSKRRLMHSTGHNIVTVGIEDKFWKYLSDLYTTLIDIKWRWNILI
FVSGFVVTWLLFACMYYALSYLHGDFDEQSADFVPCILNVKTFTAAYLFSIETMMTIGYG
IRVQTESCPGLYLTVMLQSIVGAGLQFMLASIVVSKTRRAKRRSETILFSNQVCIYEQDC
KLHLAVRVGDMRKADIAGAHAQGYLVKKYRSQDASFLFVPILVNFKGESGRDLIFFPWPT
QILHLVDEDSPLWSLSRDELLKGRFELIVVIDGVSGATSRPFQARKSYHTCEMKWGHRFD
NLNLSYGWGGSYLMDLSTFDNTVPTSAPLCSARDITHLREMYKATHPEPSLPTQHNSTTS
HSSQLQSTSTASDIQVFSEADSISVEPGNHLNTPVTVPRSQRSKSVEERIPPPPNIERQR
RCSLGDMIRASQGDKGVKQSQYVDALNIYRHRRSVTDTYLGEEITEEGDEVYDSNQAILS
VVSRRSAEKRIDSRDPSSDVEAQFNCSSVERQKIEQKRNQNMTPFRQF
>Cuni_T015762-R1  Name:"Protein of unknown function" Cuni1032:113051-116561(-)
MEIYGFKKRLLAVLLLLTALLSLCHACVPGCQCTLAGTGKRQRGRKVDCAQHSAPLKSLA
TINFPPDTVHLNLAHNGLVILKRASFIQLSSLQK
>Cuni_T015763-R1  Name:"Similar to Myo9a Unconventional myosin-IXa (Mus musculus)" Cuni1032:182495-276823(-)
MEMVGFSHETQRKIFSVLSAVLHLGNVDFKKKGDKHHDESVAVKNEEAVKIISMLLKVKE
QYVLEALTQKKTTAGDETFVISYRMEDAVATRDAMAKCIYGALFDWIVLKVNQALLAKKH
DSEHEGDSIGVLDIFGFEDFGINSFEQFCINYANEHLQYYFNQHIFKFEQEEYQREGIQW
RNIEFIDNTGSLELFSKRPNGLFCLLDEECSFPAATNETLLNKFTHHHKNNPHYQVPQLK
EEVFSIMHYAGRVKYFVKDFREKNLDLVRPEIVATLKMSSMAFVREIMGIDPVAVLRWSI
IRAFFRCYFGFIRAGETYRKNGGKDGHKQQQRRVSDNSVQDVFNENLLSLDPEVVQQLLS
QISSGQNCHSPLLKGHLHEELQLHCTLTNGLSEDEAKNIRMAGKLLMKNKSFRPKQRPSL
SFRDIKALKVVASHTMTGCGRGTGNKKQPPTVGAQFQWSLSRLMNTLNQANPYFIRCIKS
NTEKAPCVFDEELVMRQLRYTGMLATVKIRQSGYNYRLLLNEFTQLYKILLPRKQQHTKE
DIQNFLTAMGLKEENYQIGMTKIFLRESEKMQLDEALHSAIMKRVVTIQTWVKACLERKA
FLRSKESVIFIQKHIRRFLAQQDFQKYQLYQLHCASALRIQTFYRCYIERQKFLAQRTAL
VYIQSCIRAAVARGRFIEQRGVNAQLAKEAAEKKIQERLEKERQLLEKEQESERLKVVEA
ERMKQEEIQRKEELIREQLEEEQMLAERIELDRQDKKDELHSAASDEGVLLKASSTEELE
ERDFHSLSRRDSEESSGIMDGSDTEVGLIETHTKPVIDTPPPTPDSKISYLSEILNEKSE
IHLSRVQEIAKAFQKAHEEEAAQGMNEHPADTPRKPTELKISRTPLLPDDKRREIEAVLS
HKKDMIKKREEVGDYDDQASVYLSPLHKAKRHWKNWVGGTKKKKDDSEEESEDSVSLNSS
KRIEAMGVSVLPQIPMSTLSPITKEKPVNIMLDESVKSSHWNHRRQKKKQRRVNDKNSSV
SPGGNQSRSNMKVARSTEWQYAENMVITDVAELGYLDEFISQKQMELYRDTNRHDTVFDR
IFKGALEKFRKDLKALKAVESSKDKPAVRYRDLFEKFRYILEAEMKQDKTDAPIVMSVNA
FRGFLDEFRKQEEARSRENKKDDRLKEKKTLKREKNKKAQETIDYNGHKYQQIQFNIPTF
CEVCTSLIWIMDKVLVCQDCKLACHKKCYSKQISPCKGISESRGQSSNQLFGAELDCLVS
DRQRVPLVCERLMSTLENTGIYVEGIYRKPGSAPKIKELKAALEADVEAVVLENYHVHVL
ASVLKLFLRNLPEPLLTFDLYDDFLRTTEIQDEKELIKSLFEVLKKLPRANFDLFERLCF
HLACVAMHSDSNKMSTNALSVIFAPVVLGTNKKLQAQDAIALMPQQM
>Cuni_T017314-R1  Name:"Protein of unknown function" Cuni1033:147558-158245(+)
MTSVASETPMLHRLPAESSDLISDASVYWIRISLGFVVHPTVLLSPTESIDLISDESVDF
IRFTLGFILDFPILIFGMSANIINMVVYIKIGVGDTVSVSFFALSIVHFGCIFFYFAGRV
FFVLEKIFNVESYIDLGAVFHLVAFYNYLFKDMADGVIVFIAVQKCCCVAIPLHFKNTFT
YARSVSALVIMFLAALAYYLPAFTGQRLGPVVDSLTNTTRLVYTYHPRILILIRISKVLN
GLILPVLSHSFVVLCSVVLSIKLKRAVSFRNSRPANKKVKTNTKLLFSKETFPKLDLLHQ
ESGKLGFPKRRLQKLKGKELKVVQAVYFTAILFIASNIRNVPIKFVGFFVPDLQDICGSR
YYNTYVLVTSVQSLLDHLGTALHLFIYVKFNRMYRRKLKALFCSDKPTTRDQRQGWKLKA
LFCSDKPTTRDQRQGWKVESLVL
>Cuni_T017315-R1  Name:"Protein of unknown function" Cuni1033:175333-176514(+)
MPSANCKSSTILLSPTESIDLISDESVDFIRFTLGFILDFPILIFGMSANIINMVVYITI
GIGDTVSVSFFALSLVHFGCIFFYFAGRVFIVLKKIFNIESYIDLGAVFYLVAFYNCLFK
DVADGIIVFIAVQKCCCVAIPFHFKNTFTYARSVSAIVIIFLAALAYYLPTFTGQWLGPV
VDSLTNTTRLVYTYHPRILTLIRISKVFNGLILPVLSHSLVILCSVVLSIKLKRAVTFRN
SRSPKEIVDKTNTKSLFSKKTFHKLDALHQESGNLNFSNKRLQKLKGKELKVVQAVYFTA
ILFIASNIGNVPIQFVGFFIPDFQDICGSRYYNTYVLVTSVQALLDHLGTALHIFIYVKF
NQTYRRKLKALFCSNKPTTGDQRRGLKVESLVL
>Cuni_T017311-R1  Name:"Protein of unknown function" Cuni1033:72456-72926(-)
MSQEDPVPISQTYKAPQDVDQEFVSASLIGAGHTRGHSEDDFLAYSEPDFENSSENPYRD
TTESDINLRHIPLADLVPRPWKTFEQVMVASYISVILCFVTGLLSVRYARRGRKHQSKGL
MGMAQKELKIAVWFIYASVAFGILIFLIIIPVAVSV
>Cuni_T017312-R1  Name:"Similar to Dnajb13 DnaJ homolog subfamily B member 13 (Mus musculus)" Cuni1033:90789-104113(-)
MGVDYYAILCLTRSATDADIKKLYRKLSLKYHPEKNPGDQDAADKFMQVAEAFDVLSDPR
KRAVYDQFGEEGLKRGVPVGSGEAGAWTYGYTFHGNAEKVFRDFFGGDNPFQDPPIERDL
YLSLEEVYHGCTKKMKISRRVMNEDGHTSSIRDKILTIDVKRGWKPGTKITFTQEGDQGP
NNIPADIVFIVKDKPHPRFRREGANLIFTAKLPLGRALTGCTVSIHTLDEKILHIPITDI
V
>Cuni_T017316-R1  Name:"Protein of unknown function" Cuni1033:196870-204660(+)
MSVVHQIHKLSPVNDVSNAPGTLSWLRDDVSNTPGTLSYFPILLFGMSANIINMDVYLKI
GICDTVSVSFFALSLVHFGCTFFYFAGRVFFVLKRIFNVESYIDLGAVFYLVAYYNYLFE
DVANGIIVFIAVQKCCCVAIPFRFKNTFTYARSVSAIVIIFLAALAYYLPTFTGQWLGPV
VDSFTNTTRLVYTYHPRILTFIRISKVLNGLILPVLSHSLVTLCSMVLAVKLKQAVSFRN
SSFANKIIDTKDTKLMFSKEIINPVLTFHKLDPLHQESRNLDFSKRRLQKLKGKELKVVQ
AVYFTAILFIVSNIGNVPVEFVGFFVPDFQDICGSRYYNTYVLVTSVQALLDHLGTALHI
FIYVKFNQTYRRKLKALFCSDKPTTSDARTRLERVLQ
>Cuni_T017309-R1  Name:"Similar to exsA Spore coat assembly protein ExsA (Bacillus cereus)" Cuni1033:26035-27285(+)
MSTTLLALLPILIPILIPILIPILIPILIPILIPILITILITILIPILIPILITILITIL
ITILITILIPILIPILITILIPILIPILIPILITILITILIPILIPILITILIPILITIL
IPILITILIPILITILIPILIPILIPILIPILIPILITILIPILITILITILIPILIPIL
IPILITILIPILITILIPILITILIPILIPILITIFIPILITILIPILIPILIPILIPIL
ITILIPILIPILITILIPILITILIPILIPILITILIPILITILIPILIPILIPILITIL
IPILITILIPILIPILIPILIPILIPILIPILIPILIPILIPILIPILIPILIPILIPIL
IPILIPILIPILIPILIPILIPILIPILIPILITILIPIPHQILSPQVNKPVDHRN
>Cuni_T017313-R1  Name:"Similar to Arginine kinase (Haliotis madaka)" Cuni1033:108308-128457(-)
MDLETEANNLFRKLREATDSKSLLRAHLTCNILARLKCLKTKFGGTLVDCIRSGVENPES
GVGLYACDPDAYTTFAPLFDAVIKDYHKVKKLDHPKSDFGDPEKLDFEDLDPSGKMIVST
RVRVGRSHDKFGFPPVLTKEDRIEMEKKSVEALQKLEGELKGTYYPLTGMSKETQKQLMD
EHFLFNDSDRYLRAAGGYNDWPTGRGIFFNDKKTFLVWVNEEDHLRFISMQKGGNLKEVY
VRLVKAVKALESSGLSFAKRKGLGYLTFCPSNLGTTLRASVHIKIPKLSASPEFQAFCDK
YNIQARGIHGEHTESEGGVYDISNKRRLGLTEIQAIQEMRRGVEAVIAKEISLGGGKSD
>Cuni_T017310-R1  Name:"Protein of unknown function" Cuni1033:49206-51065(-)
MGCRCRWLGCRCRWLGCRCRCLGCRCRCLGCRCRWLGCRCRWLGCRCRWLGCRCRWLLLR
TAGCRWLGCRCRWLGCRCGWLGCRWLSCRCRWLGCRWLSCRYRCLGCRCRWLGCRWLICR
CRWLGCRWLSCRYRCLGCRCRWLGCGCRWLGFRCRWLGCRCRWLGCRCVGLLTELTNILP
VLLLLCTHQL
>Cuni_T011406-R1  Name:"Similar to TCF20 Transcription factor 20 (Homo sapiens)" Cuni1034:127017-154676(-)
MNHHYPDNYHGYGHTAPSMPNIGYNGGYGDQTAMARMVHPREGYQMSPYQLMQQSGAMYS
QGGFMGQQSNNPYTMGSYGNYGMSAMNPSIMMGSRQGDLSRINGGNMGSPYYSPSMPSEA
HTTPHHGGLSSQPSSYSHSQANPHMQPQQQQPPHMGIMQNQGHHSITNQPIHGQASQHAH
STGHSMPQGGPHQNSGGYASQSSPHMLPRAHHVPQHPMRHTTTQQNPQEVADNILQMASS
YPSNQTVQVPLKSRPAPYHIPRSPHYSMSHGDHPHMSPTSPVASCQASPTPSSASVKSPT
PVLVPIPNPIPSPGISGLRSPCNQGMSPCGTQRSPAHMGSTYSGHSQGGPPTQCSSDGLP
LHHRMSPSDTLHYSPCGMAPVHSYSPFSVSGSVHRNSSVYSPSCDPNSISCSDLHQHSYT
SPASSSPCSSNLSLTGASKHIMAQSTNSHPSVSFLHMDTNPLMSLQKLVMLPETQVIDPK
SVVNDTCLSSQHDESPKNGNGPAERLAESSCHSVGFQGHTSSHRSHPQNNYQSFQPENTD
AGTSVSSNYLCNSYSDSQAPRHSQYNVVNNYSHRGGSSRNTNPKQGGEAEPSDHEFGNHR
VDFNVVEQSACDRSEEKIEETHTPQESAKQESTHLMLSQDENISADNPGLDAVCITDANV
EAGDADKDSEMSVMPNILPLEDADINTVIGFRTEKAVEIDSQNSLYSKDRKIGKMKDDTK
CLIVQCHSPSVLSEMPIVNNGLSSTTCGNDDDLEQDCGNGVHARIQNALNSLVKAKLASV
KKMSQFAHVTPCSIAVGADERAACDRFAFRHNGFCRTLRTSNVVCSGRNRNDSTGNGDSD
ESLENLSENSFGFSESPQDGNRKKPAKAAKHIDHKKANMNNMTSTVKVGDGGSKRVEPVT
SGSGECVSYGHEVVSDDDTCYYEGVDSSDIFINNCSSDESVASAGEVRHGSNSAKEAADA
TLEEPASLSIPSSASEVQEEEDKTNDEQDTKSPPESDKQSPVTEAVLSSPPPKRLRRSSE
QKAQTKWDSSAGSRKSLAGSVNEEDDTIIDLTCDSIQVTTVSACIRPDQTAANSTMRSFR
ERNKNSTRFRPSILGHRQDGKYPVVVLEKSPIAGTPSAVVKQEKVDHCDPLESSSPLRDQ
KANAATPVSFKDLVTDKSENQEPEFKSENNDFVITFNNAENDKCIKMDCEEAVEENGVKP
SSSFEAISHKNKMHKKKPSRRKAVKSKHKTKAPEKINRDTEVRDSFKSMKFSRTLDLIKS
RKKREQQSVGPFIRVVGKQSTPDSVSVFVQPVHESSKGVGSGKHKHSKHRNAHLHSAATT
VHMVTNLPTDKAAMISSSRTISNNPWVCAFCGHQSSYGFLGDLYGPYFKESEVPRVEMIA
AEESKRTEPGRDQRISDSLGAKLSKETSPPDKRSSRKGKSPLQLRSSEPSPVPPEEVWVH
EACAMWAPGVYLIDNKLFGLDEAVRDAEETVCSACKSKGAMIGCLHKGCCMKYHFICAID
KDCFMDEEKLSLLCPKHKVDLKMKKKKDLSFSLCLFSC
>Cuni_T011410-R1  Name:"Similar to Fscn1 Fascin (Mus musculus)" Cuni1034:280901-281744(-)
MTATNGVNGSSKPDLQWKVGLINSAGKYLTAESFGFKINVSGTSLKKKQTFILEQDPLEE
VLYIKSHTGRYLSADKYGNVTCEAEERDQMEKFSVEYDKHGSGKWAFRNVAHGNYLGGNE
DNFKCFSKSVTDNELWVVQLSIHPQVNLRNVNRKRYAHLKDEQLQVTEVIPWGKEALIIL
HFDNGKYALKTYDNRFLNRDGTLSTDLSDDSRFTLEIKSGANCGLAFRDCTGAYLTAVGA
TATMKGRNKTVSRDELFMLEDSCPQVVLTSLANNKKVSIRQ
>Cuni_T011408-R1  Name:"Similar to Cox11 Cytochrome c oxidase assembly protein COX11, mitochondrial (Mus musculus)" Cuni1034:206047-230867(+)
MVWIHAYGREIFSALKSSFQKCGGHANLHRWTNSIPPVMHKLSASQVAQIPIRHIQLFCV
ALPAPCSYSSSLKYASRILSRQTNCRHTLWQRQSAYKGLVLSSTKAFSTSHWLSAAQRND
LKSSNKTGLIYIIAIFIFMLGGAYAGVPLYKVFCQATGRGGQAVKGHDTSKIETMEKVER
PIVVRFNADVASSMRWNFKPLQTEVTVYPGETALAFYTAKNPTDKPIIGISTYNILPYEA
GQYFNKIQCFCFEEQRLNPHEQVDMPVFFYIDPEFDEDPYLQNVDSITLSYTFFEALDGL
QLPLPGYHQPHNTPVVAAS
>Cuni_T011409-R1  Name:"Similar to sn Protein singed (Drosophila melanogaster)" Cuni1034:240509-250885(-)
VDVTANQDEAEDTDREIFQMELVVPQSDGVPAKWAFRTVDNTYWTQEPLGGIQATARDRS
NPNAQFTVDWIGDGTVAVKAHNGHYIQSRQTGQLVGVSDTVTNKEKFYIKIINRPLLLLK
NEHGFVGLKSTAKAEVQCSKTNYEVIFVETSNDGHYFLKGANNKYWRLAEDASIIADGDS
PVPFLLEPRGSSILTIKGPNGCYIKGEHNGLFRAIGQEVDPTMLWEY
>Cuni_T011405-R1  Name:"Protein of unknown function" Cuni1034:98965-99517(+)
MARRLTQYLMTNKYIDTSVQKGDIPGVPGCLEHATMIWEAIQRAKHERTDLQVICEESAR
TILKRLDAVVQWS
>Cuni_T011407-R1  Name:"Similar to DRG2 Developmentally-regulated GTP-binding protein 2 (Homo sapiens)" Cuni1034:167508-188496(-)
KGRGRQVIAVARTADLIIIMLDAMKGEKQRELLEKELEEVGIRLNCRKPNIYFKQKKGGG
ISFNSTVPLTKTSEKMVQLILHEYKIFNAEVLFREDCTSDEFVDVILGTRVYMPCLYVYN
KIDQISIEEVDRLARQPHTVVLSCNMKMNLDYLMDQVWEHLALLRVYTKKRGERPDFESG
LILRQGATVEHVCHVIHRTIAQAFKYALVWGQSTKYNPQRVGLTHSMADEDVIQIVKK
>Cuni_T011404-R1  Name:"Similar to zip Myosin heavy chain, non-muscle (Drosophila melanogaster)" Cuni1034:14853-52521(-)
GELENQLLQANPILEAFGNAKTIKNDNSSRFGKFIRINFDSSGYISGANIETYLLEKSRA
VRQAENERAFHIFYQFLHGANAKQRQEFLLEDWGKYSYLTYGKVLVPGVDDSAEFKNLTE
AMEIMGITADDQSAILRTVSAVLLLGNMQFKQERNADQAVLPDDTVAQKVCHLMGVPVTA
LTQAFLKPKIKVGRDYVTKAQTKAQVEFAVEAISKALYERMFKWIVMRINKSLDRTKRQG
ASFIGILDIAGFEIFKMNSFEQLCINYTNEKLQQLFNHTMFILEQEEYQREGIEWKFIDF
GLDLQPTIDLLEKPMGILALLDEECLFPKATDKTFVEKLIAQHSGHPKFEKPDFRADADF
SLIHYADKVDYSADQWLMKNMDPLNENVVSILSQSTDPFLVNMWKDAEIVGMGAVAAAET
AFGSRTRKGMFRTVSQLYKEQLGKLMATLRNTNPNFVRCIIPNHEKKANKIESGLVLDQL
RCNGVLEGIRICRQGFPNRILFQEFRQRYEILVPGAIPRGFMDGKKAVEKMISVLELDAN
LYRIGQSKIFFRAGVLAHLEEERDLKLTDIIVQFQALARGLLARRNYQKRLQQINAIRVI
QRNCAAYLKLRNWQWWRLFTKVKPLLTVAEHEEKLHSKEEELKKLKDNYEKQKQETEELE
RRYAQIIEEKNILAEQLQAETELCAEAEESRARLNKRKEELEDILHELELRIEDEEERYA
VIQEEKKAMQQQIKDLEEQLEEEEQTRQKLQLEKVTADGKIKKLEEEAAALDDANQKLLK
ERKLMEERLAEAQLNMAEEEEKSKQLGKLKSKYEAIIADLEERLRKEQQARQELEKIRRR
LETELADLRDQLNEKRQQVEDIQAQLAKREEEVQAALQKADEEQVAKTTLQKQLRELSTQ
LQEMQEDLDAEREARNKAEKQKRDLNEECEALRAEVEDSLDTTAAVQELRTKREQEVAEL
KKAVDESQKIHEQVLQEVKQKFTQQVEQLTDELENVKKVKANLEKVKATVEAENTDLAND
LKSVQMAKQESERKRKQIETQFAELSVKFAELERSSGDSGERAKKLQTELEQVTNQLVVA
ETKALQGAQKVSSLEAQLTDIQ
>Cuni_T011403-R1  Name:"Similar to Myh10 Myosin-10 (Rattus norvegicus)" Cuni1034:161-12568(-)
IIEIKKKAEEDLANNEALEEYKKKTSRDMEQLVHQLEEMSAQNDKLEKSRRKLQAELDDL
TVELESQRANVSNAEKKQRKFDQLLAEEKAVSERLAAERDQVEKESRDKETKYLNLQRQY
DELKEKVEQLDRIRIQQARELEDLVSKEDDVGKNIHDLEKAKRSLEATVAEQRQQIEDLE
DELQAAEDAKLRLEVNMQALKAQYEREQAGREDQEEESRKSLLKQLREMESELEDERKQR
ALAVNARNKLQGDLTGLEQQVEMANKIKEDAVKQYKKVAAQLKDYQRELDEARLAREEMA
AAAKENEKKAKNLEAELLRLQEELAAAERAKRNAESERDEMADEISSSNSAKQALVDEKR
RLEARISELEDELEDEHNSAELNSDKARKAQLQLEQLQTDLASERSVSQKLENQRLTLER
QNKEMRDKLAELEGQNRARTKATIAALEGKVSNLEEQLDQEAKERAALARTNRKMEKRLK
EFADQYKDQVVDFFLLCSMQKRGLMSVKNAIAVKYGNFMLHDVMMFLVKILSRCVCNVKS
VENFLLHASMMLSICVCEK
>Cuni_T019059-R1  Name:"Similar to Gm2a Ganglioside GM2 activator (Mus musculus)" Cuni1035:75640-89729(-)
MALWTVLIHVYVMFAVVVSSRIPPSDNRKKREKSMLDFVDCGTAEKLIHFHHVDASPNPV
IIPGTLHISMSGNVTSDLPRRVNVYMGMKKYLFGFPFTVPCLATGIGSCSYENLCASLEQ
YEVNGCPGPLRHLGFPCHCPFLAGDFSLTDIPLNIPKIQGFASTLLNGDYELELRISEED
GEELGCLHVKFSMKKRSKGWLFKI
>Cuni_T019060-R1  Name:"Protein of unknown function" Cuni1035:226038-226281(-)
SDGESSSSSSSSSSGSSDDSDDSETDDSDSDSSSSSSSSSESSSSSSSSSSSSSSSDSSS
ESESGKGDKAKQKKKRRKSD
>Cuni_T019057-R1  Name:"Similar to ADGRE5 Adhesion G protein-coupled receptor E5 (Bos taurus)" Cuni1035:28027-33787(+)
MFCWMLVEGIHLYVVLVRVFKGGFHFRKYLLVGWGTPLIVVGISLGAFHDKYGVGNVCWL
SHEVLLVGFVPAVAVVIM
>Cuni_T019061-R1  Name:"Similar to ZCCHC10 Zinc finger CCHC domain-containing protein 10 (Homo sapiens)" Cuni1035:237982-238143(-)
LVKQEDYRCQKCLQKGHFTYQCPGKRKYVERDSRTRLMNKRLKMDEEKAKLDI
>Cuni_T019058-R1  Name:"Similar to ADGRD1 Adhesion G-protein coupled receptor D1 (Bos taurus)" Cuni1035:38960-40628(+)
VKAAVVLLPLLGLTWILGFLAVGTDQVEAMTYVFTYLFTITNSFQGVLFFIFHCLLNCDV
RQAFERRYNRRKRSSCVETSLSRQRKFSDLEGFDNNAQR
>Cuni_T019056-R1  Name:"Protein of unknown function" Cuni1035:12469-14752(+)
VPDVPVAIYIARFSSVAPLLSISDTRSNKKYPNDSSIINSDVLSVEFLNISKIIFQLLSQ
PVVLTFSLQ
>Cuni_T015418-R1  Name:"Similar to Nep1 Neprilysin-1 (Drosophila melanogaster)" Cuni1036:142121-188305(-)
LSSANLGMLQESLMEERNNSAIMAYEKYLAETAIALNASREVAEMDAKDVVDLEKELASI
MVPREDKRDHSKRLNPVSLNDLNSISDNLDIVRALRTSFDTVNITLAKNERIISYYPTYI
GNLSSVLQRFSNRTIQNLFGFSYAVTRVAGLTRKLRDIKLEYDMVVNGVESEPHRKDFCI
QKTSAAFWKGLSKQYVLRKFPKAAKDYLKKMIKHLMKEFHRIIEEATWMSGHTKVGAFAK
LASMRQSLGYPDEDFEDSDIEKFYENHTMKYMDYYNNEVIRFNQARQLMLKSLRQPSSKN
QWELPPHEVNAGYDPNQNLLMFLAGILQPPLFSETYQHYINYGGMGVVIGHEITHGFDDE
GSQYDKDGNLRNWWTEEDRQSFRDRAQCIIDQNSNTNVVEVNITLNGVNTQGETIADRGG
LKESFRAYQRKVKRCGTELLLPGLHLTQDQLFFLAFGQLFCEKWKPPILKMLLASGSHLP
ARYRINGALQNSEEFAKAYNCPLGSFMNPQKKCSVW
>Cuni_T015416-R1  Name:"Similar to EEF1AKMT4-ECE2 EEF1AKMT4-ECE2 readthrough transcript protein (Bos taurus)" Cuni1036:75592-94747(+)
NYIIKNMNMSADPCEDFNEFACGRFIKETNLPSDKQIITSFSALLDQNSLFRNIILEGGL
PSQPNYYRKMKRFYKSCKDEAQIEAVGLEPYFNDTEFTDDWPTLNPDWNEANFDLNEVIA
RYMAEGVEPIFSITVSYDMNDSTTNVIKLSEGKLGMNQESFLKNRSDPSIMAYQKYLAET
AIALNASQEDAEKDAKDVVDLELQLDSIMVSRTDKRNYTKQLNPVLLKDLNSISNKLDIV
RALRRSFDTVNISLADNERIINLYPTYMSNISSVLAEFSNRTIQNLFGFKYALLRVAGLT
QKLREIKLVYDKAATGANAEPRTDVCVSRTSEAFWKALSKQYILRKFSKTAKFY
>Cuni_T015417-R1  Name:"Similar to Nep1 Neprilysin-1 (Drosophila melanogaster)" Cuni1036:103313-125959(+)
LASMKRYIGFPDDDFEDSDIDRFYKNYTINGKEYYNNEVNIARQARFLNLKSLRQPSSKN
PWTTPPHKPNAGYDLNRNAIMFLAGMLQPPLFSETYQYYMNYGGMGVVIGHEITHGFDDE
GSQYDKDGNLRNWWTKEDLQNFRDRAQCIIDQNFNTTVVEVNRTLNGNSTLGESIADRGG
LKESFRAYQKKMKKCGAELPLPGINLTQDQLFFIAFGQFFCQKRTPESLIKQVETRPHLP
GKYRVNTALQNSEEFAKAYNCPLGSFMNPEKKCSVW
>Cuni_T015415-R1  Name:"Protein of unknown function" Cuni1036:21537-21836(+)
MLRIALFCQLCQGLPLFCQLCQGLPLFCQLCQGLPLFCQLCQGLPLFCQLCQGLPLFCQL
CQGLPLFCQLCQGLPLFCQLCQGLPLFCQACNGLPCLYS
>Cuni_T008820-R1  Name:"Similar to Mga MAX gene-associated protein (Mus musculus)" Cuni1037:429031-430539(+)
SAPACDKEYCRLGCICDSIDHERPIASKTHCRRPSCMLQCVCLESGSFDGNEDIPYLPSM
RRRPKPGDRFSNLPQREKTHRSAKNLDAVTRKAMMLYETSEIYCERVERTRKRSDMASSP
ASTSFDTSLLAAAVPTSCSSAAFDIDSVSDPSEDSSFQTDTFSTDVPMASETMGSTPSHP
FIIFNTSPQ
>Cuni_T008817-R1  Name:"Similar to MTMR2 Myotubularin-related protein 2 (Bos taurus)" Cuni1037:291389-320527(+)
MDRKEGNDVPGGKAKTPIESLSLTVLSPDRGFHHSSPSSSSKGSHSASSPSKSVCSSAST
SSESMPVFDTKTMREATKMVQNEDCPLLEGESIKGKASDVTYLCPYSGPVRGTITFTNYK
LYFKSVEREPPFVLDVPLGVVSQIEKIGGATSKGVNSYGIDIVCKDMRNLRFAHKQENHS
RRQVFEKLQQYAFPLTNKLNFFAFEFKEKYGQENGWKIFDPVKEFKRMGVPNESWRITKV
NENYQLCDSYPAVLAVPKQATDQDLQKVAEFRSRQRLPALSWIHPESQATITRSSQPLVG
MTSKTNRDDERYIQMIMDTNAQSHKLYIMDARPSVNAVANKARGGGYESEEAYQNAELIF
LDIHNIHVMRESLRKLKEVCFPTIDDARWLSNIESTHWLEHIKIILAGAVRIADKVESNK
TSVLVHCSDGWDRTAQLTSLAMLMLDPYYRTIRGFELLVEQEWLSFGHKFKTRVGHGEDK
HSDADRSPVFLQFIDCVWQMTQQFPNAFEFNENFLITILDHLYSCLFGTFLYNCERERVK
ERVPELTVSLWSYINYQQEEFTNPLYTAHVHQHVLFPVASVRRLEIWTGYYCRWNPRMKP
QEPIHIRNHELLVLKTQLQRKVEELQRELTTRNARINLQPSPPRVSTPVDV
>Cuni_T008815-R1  Name:"Similar to si:ch211-233a24.2 Transmembrane protein KIAA1109 homolog (Danio rerio)" Cuni1037:90903-186763(-)
IYVGESIPLIVYGIVKVEKFMISAELSGLRLEAITTKVHASGTYKKKVKGFQHRVSSDSS
YTAHVGHSMIHLREGIPPELQTVVTININKSQSLLTSVMRRNKEHNSILVSIGVIDVDIP
QHPVILHDMMSRSSKKITATLQELRWPAQNINRPHVPTEANLNQSAAATAGIPSKVPSEK
PMEKVVRKHLHIKSVMQGLVIGASILPSLKAQYKTEAITLSGVLGRKAHFTVTLPTHLLS
FKSKITAAAVLADSLIPSAASIELPPIQVIADYRVQKPGTLPLLEGNYLYAVAEVGMLEH
SLTTDLLNHLVFVQKVFMKEINEVVQKVSGSGGGHEIRFKIDQNISHRNPLLYSVSVRLK
GIQVTATTPTSNAVRFETGAITLDLSNRFHLPKKEDPKRDKSAEEHDKYVSSQKMFVQAV
VDLNLALGQLIKNPVFEEAEPEFHTMAFFKTTIKIRNALQHEMIPNLSHDQEALLIHLSR
PIILAQPLAFDKAVLVWLNYKNAYEYWTEQRMALNKEVLTATRQVMDKLPQIAPTSSPSI
TTLFLQLTVDDMGICVPLLSSPYQPVPNPGPGLQSPRVTEAEQGSALVLTVESTQISACS
SGSLVSKGKFKNFCLRFADDFGTSWDDWKPRATDCGAVMNQCNVPSGTYEVCSRTINKQD
TNSGNAKWILNVQWDMKGIDVHLDTDIGKRFTLLGHTLTLLAGDAAESLADVTHPTKHAD
DENGDFYEDDEDAVDLSSPGTLDNSQEELQLKRRTSLASDILPEEIFSDHFDPKERARKI
EREMNEQAKIVQELKECGATEATIEIERKKLEDLQALLFQDFRRDLMEMLKRKGDRASLI
KDKLGLSSRPLTHMRSRSTGTHKLTRSYTDRQTTLCAGDEDDRRLSDDLSRVPKVSFSGS
QLSTYTPPGTPVRSAYTESLSDDEDDGDAFHRNRQKSRSLEAIPSSGSDSQNDESAPYRR
RLNEKKRSEDSGSGSSREQSNKLTEQNIDFELDVKVFIDSGKCVLYPKEAKEEEVRKQAR
REKQGGSEPSLLTSPTNKRKLKKELSGGSIANQRKMSANPDTTIFFVPSLAVKVHYNSKT
DHTNYVSPNATIVEEPETTTLHDESRYPFAPEIMLTAPPASMREDPASYLESGSPRRAGQ
LKRASLYAWLTLQTLPEEMIISPTFLDFLEQALEPLPVTSSSSPSILKRDVMDSLVNNME
LDASQVSLGQQSMAFFPVDVVVHIKVDPSFIRFNCHPVSRVECLLQVPSLDLFFSTKKTD
ISENMLSDSAQAAKTNKFQGFKQSVPSPNNNQQSPRSRHTSGLSDNSFYPGPGSGGLSVT
GCMSDFSLYIFHPYGTGVQRRMQGQADSPAFRGQSGLERISENATNAIHDLGRRDSLSLN
VEFIRVNISRTRKLECYSESGEASVMSDQQTRSNVVRFSAICDIGTASFKYDMRRLSEIL
SLPKAWYRRTLARRLFLGDESVNPNRGDEADSPLPTNQMPLHSGFMSQNSMSHPSLNVIS
APLPLKKHHRRGSSGDKVRVQLSPEFTTEIASRRGAHSSQQAPAEPSSRESTIHRKKSRT
LSSPDMPRHRHSIAGLTAASSSSPTTTSVSSSWETLVLFAVNLTQLNLEVNMANVMGNTE
WCTKALKTQGRLSINSSGHKNLKIEAGFGKSSFESKGGIVGGTIDINNLHGFFSVCEDPK
LGQDPDHQAGLSTSALETKIDYMGSSIIMTRLSDLDLLLKDEWHVDSDAQMDTPLATNRS
AFLFVNGKLSWSHFHLMISRSTTPDLIKIISKLDEFFSQQVMSSRRVFQHTTSVYPTSTQ
TKVPRKISESAVMDELRHHRHWQEALGHLMGYQFSMLPSMLPQQGMVLGGTMTLEGQGLM
LASFHGVNFRAKYWALFNIKDPYIYFSTEAQKIPEGVHIVQDLQFIVGQQGKEPTGVTSP
QAIHNHMATICKISRTQHMPPNFTTVDEWFTYAMTSSATDPKVVTEFFGERIEEEASHKF
SKVKATYYSHETEVIFAFPSLYMNLKTCHFQEELPPAEDGPRPVVECSFVAEFYDHIYVA
MNAEVILFLHDLVSSYIREKDRGSSSGARASATKVGKADSKLSDPTSALKHDYRSFECKT
WQLEPTLRLIHWASTQIDPVGADYVLQKLGFSHARVTIPKWVQRGFMDPLDKVLSVLVDK
LITTLRDQQSSAMIEEATDADSADKA
>Cuni_T008819-R1  Name:"Similar to NAGA Alpha-N-acetylgalactosaminidase (Gallus gallus)" Cuni1037:362819-377105(-)
MILKLCVITLACGLVGALDNGLALTPPMGWLSWERFRCNVDCQNDPDNCISEKLYMKMAD
LMVSEGYRDAGYQYVNIDDCWPAKERDSNGRLVADPVRFPNGIQALARYVHSKGLKLGIY
EDFGSKTCAGYPGSEFYLETDAKTFAEWEIDSLKFDGCNSDPADMPYGYPVMGRFLNMTG
RPILFTCQWPGYMYGAGLKPDYAAVRETCNQWRNYDDVQDSWGSVLDIIEHYGKDPGNFS
AYAGPGGWNDPDELVVGDYGLSYYQQKAQFGMWALFASPLMMSLDLRSVDPAAKQLLLNK
NIIAINQDPLGNQAVRLFG
>Cuni_T008818-R1  Name:"Similar to NAGA Alpha-N-acetylgalactosaminidase (Gallus gallus)" Cuni1037:325535-348901(-)
MIAKLCMITLGCSFAQALNNGLALTPIMGWMSWERYSCNFDCLNDPDNCISEGLYKKMAD
LLVSEGYKDAGYQYLHIDVCWPVEKRDSNGKLVADPARFPSGIQAIAKYVHSKGLKLGIY
ADFSYETCPGYPGSEYYMDMDAKTFAEWEIDSLRYNGCDSKPKEMPYVYPLMSRALNMTG
RSIVYICQWPGYYGGVGVKPDYAALREACNQWRNYHEIQNSWESVGDVIDHYGNDKGNFS
QFAGPGGWNDPDVLVVGDYGLSYYQQKAQFGMWALFASPLMMSLDLRSVDPAAKQLLLNK
NIIAINQDPLGNQAVRLFKVSTFITVWIKKLARKGAFAIGVLNRGSQGTPYKTSLSDLGL
RNKHGYQLWEAFENKTIGSFSLTKEFVVNIEPTSIYIIIAIPK
>Cuni_T008816-R1  Name:"Similar to KIAA1109 Transmembrane protein KIAA1109 (Homo sapiens)" Cuni1037:260461-279292(-)
GRLVFGNYLMPYSFVLKCDRANMVYTTKPASTVFDKFMHILKCDVENARLMLVSSPKYNG
PVQDEPPRFMGEGFVVMMSNNVDVYYYQDEPGIVQHEPEQIQMADGEVLVKRTYPCVGVD
IKCGKNTDFNYGPWVDRQRELIYKFFYPPDYQPLVPSREAEPGEKRQFKSMEVKLTINAI
SAIDILFTKNAMTQALHMNAGKGSYVEVTIPYIVEDSGFVTKVKGQLMLVDATTSMSFRS
LLECETLEFDVTASYPREWNACQEWRCELTACKAVVYLIYDLKSFFSDLVNDWSSKSPPD
IYSFVPYTWTLSLVIKQFEVLTLSNENNWVDTSSQHQENAHVGFCGEHFDLCVTFPFNDF
MPETVPINLVIKGDTVFCRLYLPESNTMRHTLIAMSENIKIVDREGNEIGKCLDPASDKQ
WRNVTLNSNGWVDCWTTPYVFLTVTYTYYPAPPLLSHASADRLAHYGTCVPILEEEIPDV
DFLQPSCSSASHPGGTSYTSGKDHTFDPGLMEPDSIHVELEIAPSVVVLYGSLLRNLIHL
KENYLGEFQKATDFVENLSKQSDIEATYVHVDYPDEDEQPFDARKYRPFSVTVSVTLHDI
QAHLAK
>Cuni_T013391-R1  Name:"Similar to RXYLT1 Ribitol-5-phosphate xylosyltransferase 1 (Homo sapiens)" Cuni1038:112862-148876(-)
IADDPDWNPWGEEFDSEQHKLLRHHVAPALWDIGVRPMERDPHPLPVGKRSPLERRDNNS
SDISHVVEIWSKAAIGLYLWEHILEGLLEPRLNGIWSFGERTLRFIKF
>Cuni_T013395-R1  Name:"Similar to ELF5 ETS-related transcription factor Elf-5 (Bos taurus)" Cuni1038:394595-405354(-)
MYSCCPEPLDLRIDSKKRVREDDSSQIYYKDGYGSYSTECASYPQFFPSGNCSLAPCTVK
QSLDLQHLSIRQGSPISDEGFDEPSIPEETLPRFLNIQQYTDSDRDSHSCRSISSSPKDR
RTIGGEVVPSHEKERRKPGRKPGQVSNVLHLWEFMRDLLHTADGRGIIEWISRQDGVFRV
VNSSEVARLWGEKKKNKKQMTYEKLSRSLRYSRLEGYFADLPKDKNYPKKLCFKFGSKAK
NWR
>Cuni_T013393-R1  Name:"Similar to TIMM17A Mitochondrial import inner membrane translocase subunit Tim17-A (Homo sapiens)" Cuni1038:245297-256642(+)
MEDYAREPCPWRIVEDCGGAFSMGAIGGSLFHGIKGFRNAPSGNYRRLISSFATLKERAP
IVGGNFAVWGGLFSAIDCSMVYLRKKEDPWNSITSGALTGAILSVRNGTGAIIGSALIGG
VLLALIEGFGIMFTRFTAEQFNPANRMMEEDPSQSAPQFPVSSITERSSIFANQPSYQ
>Cuni_T013394-R1  Name:"Protein of unknown function" Cuni1038:264655-271497(-)
ASCTQADIRKAKMCTDNLKNAFHTNSSAHSLISQIDENKVISACGNGDLLTAINCIERVV
EQCKHANTDTAHYFLGMVDVEKARRTVNFFCTNVKVYTANAKCIADNHNEQNSCAAEAKK
NFDTQAKATKNMDVLMRFQCIFFHEVVKCVDKVLTQKCSNEAADIVKTVLVGFEPPVCST
ISGGSTAERAGTYDVQSDARYDNRNQASSCQLKLNVLLVLCSLISALKFLMF
>Cuni_T013390-R1  Name:"Similar to rxylt1 Ribitol-5-phosphate xylosyltransferase 1 (Danio rerio)" Cuni1038:66644-73987(-)
FRTGPGVVPSKVPRDTENLLLILNGREPSKVEVSKMWLEFLPSLPLLRNAAVVLLGNERC
DNSWIHPYMSIHGGLVKAIFLVYDSPEVDNVNFFQWPLGVATYRDFPVIDPSGLPLNHKR
PYTFNFLGTVYKNSSRETLMSAINSSMYRHQGFVKPRLEWLPEETAETRDEYLRVLSHSD
LTLNPVGINTECYRIYESLALGSVPVIEDIMTPGLCGDSPSFQSHRSINNSNEILLKTAH
NKEYNLGRGNYSAPLRLLKELHAPVIFIKDWKADLDAVLQNEAHMSDADIIKRREYVIQW
YEKFKVQIENI
>Cuni_T013392-R1  Name:"Similar to Thumpd3 THUMP domain-containing protein 3 (Mus musculus)" Cuni1038:213654-234889(+)
MAAQTQQTQPLQDDEELCTIEASVVTGFEESARGEAKEKFNVDVKAVRGRITWKVPLNKV
NDVLKMGSVDNCKVVVHTVPCFHFTDQHDSLARLQKMVKDIDWEIGLRAWQHVYAFPYPI
ASRPDVIPSDEDLMDVVIITNLPPPKDKSAKKDKKKGRWGKKKDKIKELKRRILQSKLDD
SFQQSPRSPVNEKGDADVKKESDLLASHDEEVGLTDENDLSMSKKDDGSKVNRLAASRAG
QHLLKLDSARTLDNHSKPAPEEGGESLRQHNLASEVNLTAGISDEATKQAAMSFTNNSLS
PGQGSSADSSLSPVGKKISESEFASIVISRLTSPREPAPAEDGAGGVSPKMSCVTPPPTP
IRSIDNPFSNLQGRLTSELLPFLDNSKLPERGDSIQGSRQDKDDNGGIIDAKLPFSAGTA
QIESISVDETSSNMPNVPSLSTLATSASTPKTSSSAKELAEDSTNSRQQEDRDKSLEGND
SSKTYKRAAVKKEPDPTKPKFRVTCFRTGDTHAFDSTSAAASFGSALVAYFGWQVDLKNF
DLEVILNIDNEEVTVSLALTKMSLHYRNLVAFGPTTLRATICYNMLRLCRIKNGDFVCDP
MCGTCAIPIEGALNWVNCFHFGGDIHEKAIERTILNIAAIQEKQKQENKSSLKLDVLQWD
IQHLPLRDRCVDVFVSDVPFGHRMGSRSVNPALYSSLLSEMARTARLGARACLLTEDRSS
LIKAIQNLGRYWQRRLILNVNIGGLNGYVFLLTRTNFAVAPSSTSWRGDEGQIANEGQDG
DELASADSRSVTDSSVETRTETE
>Cuni_T013389-R1  Name:"Similar to SHR2 Orphan steroid hormone receptor 2 (Strongylocentrotus purpuratus)" Cuni1038:10848-45129(-)
MRSRHSRGQGRDSRRSRPIINELFSCVCQNCGSQPLTFLSRRQEPSTFRISKSANIPRII
SLFLTMTTMEGGTNVDTKKELTSEIDAAVLDGAEVLHVMTTGSSGAVTLPITLTQGGLVS
LTSPGQGVVQVSAGSLAQVDWASKLKEFQHAQRLERLREEQRQVQDRVTQKMQFDQKYEP
CVVCGDRASGRHYGAISCEGCKGFFKRSIRKQLGYACRGARDCPVTKLHRNRCQYCRLQK
CLTVGMRSESVQQERRPSDQRDKVPGNVATSTQRIYIRKDFNSPSAAIPTFSPKGIDDAK
YVSLLANLQERVVQTDHGMVVLSSQMSPGSAVNTDLSTLANVVSTVTNAEDLTTLADVVC
TVNTEDLSTLASVVTTLATMGKEEITLEDLSNTQTTSPSHNNGDANRGTPDATSRAFDTL
AKVVQSPQGHGSGLLDHSSMSETSFDQSANSDGENSLLVETQG
>Cuni_T013388-R1  Name:"Similar to SHR2 Orphan steroid hormone receptor 2 (Strongylocentrotus purpuratus)" Cuni1038:2429-4069(-)
ADLQTILVRSCWSELFTLGLAQCSATMCLPTMLAAILNHLQASLQRGDHTNQDKVKSVIE
HIIRLQDYVTHAQNLSISATEYAYLKTLVLFAP
>Cuni_T014074-R1  Name:"Similar to drpr Protein draper (Drosophila melanogaster)" Cuni1039:163922-180309(-)
SICEKGKYGFDCHRDCRCRVNEHCTVSTGLCPSGCTTGYRGLECALSCRIDTYGEGCNSS
CTDNCLQPNRTDTTSCNHITGMCLYGCRQVGFTGSHCTQECGKGTYGQGCQEECSQECVA
SRNPLESSCDHVNGSCLYGCQSGYIGVTCVDKCPTGKFGVGCKQSCSDRCAHSNNPSTSS
CYHVDGICRFGCEHGATGAFCSDVSFALYSEDSGHREHICGCRLDFLHPLLPVH
>Cuni_T014080-R1  Name:"Protein of unknown function" Cuni1039:398987-399235(-)
RNVALKELTFQDTTCKEWITGLNRIFSSDKAVDGNTNNHFYRGYSCSKTSNRLPSAFPVP
TWMVILSKEYAVNRYAIYNRGD
>Cuni_T014071-R1  Name:"Protein of unknown function" Cuni1039:38694-38857(-)
RICGDDVIRRLEYRNDHWPVYSFCRNLLCRLLLEKEKTQTFIGRSYSRGRWQTI
>Cuni_T014079-R1  Name:"Protein of unknown function" Cuni1039:346502-346670(-)
FSSLNDQEVVDGDDSTCLNRSRILQTKVVLREPFYFTWLRVIVAVKGMSECTYVR
>Cuni_T014078-R1  Name:"Protein of unknown function" Cuni1039:343891-344070(-)
LKLTFGMNTVRILRICPYLTKNLVNNRTLDMHCNLTEIIDELYLDGKSAGYICSVYVSG
>Cuni_T014070-R1  Name:"Protein of unknown function" Cuni1039:1417-28840(-)
MMRRSDITHVLCLSCVLIVIYVKSQPSCPAGWFGSRCNYKCRCFNNTCDKNGQCIYPFTC
LAGWFGPECQYSDVTNKTINDAVLTDGNESTCVAPSAPDTVTIVLQSIFFTWLRVCVQNQ
GSAALEDLTVTFSNRKTDVSCSDMKKVAVDSKTLDVHCKTYKEIDTVTLKGAVVTRLCSV
YVSGGRNVGLKEMAKQDTTHANIFNNKPRDYPASLAVDGDTRNHFFEWSCARTNGTFTWT
LTLSQTRMVNRYKVYNRNDYQHRMKGFTLESFDSDNRSLFLHRDTIPEPQTIYIINLIPI
PVKMLIITFFNRENDLMLCEVEYME
>Cuni_T014073-R1  Name:"Protein of unknown function" Cuni1039:96356-96507(-)
STTKVNCSDLKQVAVDTKTVDVHCNFAEEIDTVTLKGAAVTSLCSVYVSG
>Cuni_T014077-R1  Name:"Protein of unknown function" Cuni1039:277062-304578(+)
MFSSTILSFYLSWIQACTFGWFGPVCKYKCRCTADSCDLDGVCTGTSRCKPGWFGPACQY
ADVAYRTNSIPEAIDGNDNTCISSLKEEYIVIELNGSYIFTWLRILLSQAGFLATLQVKY
LTKASIMECINGSSFNVDNLTIDIVCHIPMQIFGVNITGEGLKYLCSVYISGGRNLALRE
KARQTSVYSELINNVRFNFTADKAVDSRPNGRLHQGTGCAHTLQSSSMSEKWCVTFSQPR
RINRYVIYNRLGGTCNCVFVCLLNK
>Cuni_T014076-R1  Name:"Similar to megf10 Multiple epidermal growth factor-like domains protein 10 (Xenopus tropicalis)" Cuni1039:245631-274951(+)
MKADYVAGTICFLGFLCVVFASSMTGCASSWFGPNCKYKCRCEDNNCDKDGMCTEKFTCV
RGWFGPSCQYDDIAYQFGDVVELTDGNDKTCVPASVEKSTTLNLNVSFIFTWMRVVVSKP
KFRSQIKAKFTSNSNATECRNRTYTTVDSITMDIHCEIADPIDEIVLSGDGVRYLCSVYV
SGGRNLALKAKTEQSSTYSEQSPSTFQLNISFTSSKAVDGKTNQRLYDGFSCAMTQESPT
RRQYWELTFSSPRSVHKYLIYGRTDSKDPEFRLSNISLESVDEAGNVVYDYSYTPTDSFQ
EVLTLIHSPQTVSRVNIHSNIFPRQLALCEVEIFGESICEAGKYGLDCENTCNCEDNTSC
IISTGICPFASVIVSPTINKTCAPGTFGDDCSFKCSEFCTKNSVGVHSCKDPTGDCDEGC
LNGYTESTCTERCPIGTYGKDCTQVCGPKCLEAKEPNTSSCHHASGVCLLGCQDEAFGPL
CNSKVENSVRQSAGGNDTSYLNLIIGLFVGVLVLLPVLYCLRKKKPTRSHAEERNRRKP
>Cuni_T014075-R1  Name:"Protein of unknown function" Cuni1039:189871-195266(-)
ICEKGWFGLNCKLKCRCQNYSCNNEGRCTNSLTCQRGWFGPSCQYVDLAFNMSDNPLVTD
GNDSTCLTPGSTSNVTLNMFTAWPFTWLRVHVKIENVVNNLSVGFMNNSVPVACTNLKAY
EVDDKTMDVHCNLTKTFDEVVLVGDAIQYLCSVYISG
>Cuni_T014072-R1  Name:"Protein of unknown function" Cuni1039:56262-64785(-)
ILYWMRGFILESFDSNTRSVFRYQETYPHDRFCYRVNHMPKPIKIITLATVHSDKILAIC
EFEAHGDSLCDNEHYGRDCELSCQCPDKLPCVASTGLCPIGCPPGYVGLRCLT
>Cuni_T006037-R1  Name:"Similar to SPBC365.04c Uncharacterized RNA-binding protein C365.04c (Schizosaccharomyces pombe (strain 972 / ATCC 24843))" Cuni104:780712-786428(-)
MASFHANHQKQDSLQTMAPQRESTNGTGSHKVEVSNSHRKDRRKDWWDKNRKKKSDPETS
QESRANDQAADAHIFLEAVGDTNPESDKTERPKLRNRETIAKPDSLKYEPDFNKGFHNKI
MQNLYTDTSKKKKNKQNKELGGESLPKSNKRKTISPPATSEPENAKRLKESEENEAFDSY
KFSLNLINGEVDVTKHSSSKDSKNKYVLFIGNLPYNITREQLEEHFRKTGGIKSVRIPKE
KGTDKGRGFAYMEFDGRISHGIALRLHQTTLGGRKINVEFTSIGGGKSEARKEKLKLKNR
KRKNMKMQ
>Cuni_T006031-R1  Name:"Similar to FUNDC1 FUN14 domain-containing protein 1 (Gallus gallus)" Cuni104:558598-566193(-)
MKEMQKKAQFTVAPSTSEPYKRPSASVKPNPPKIPEKKVEPPEVFDDSDEESLSEIESLD
YSILEPQETGCYLESIRDFFLGDVTASSAFRQFAIGGVFGWISGYLAKKVGQLAAICVGG
GLFLTQLAQYQGYIKVDWTKVKHCLTQQDAKVKNFVMKHRHSVQTFYEENFFMATGFTAG
VAFAFSLIDIIMPI
>Cuni_T006029-R1  Name:"Similar to dctn1 Dynactin subunit 1 (Xenopus laevis)" Cuni104:496703-513290(+)
MVLFDNVYVGQRVEVLWNNGIYRGTVQFRGTIATRKGEWVGVALELPVGDSNGMLFARRY
FQCPPNHGVFVRSDRLRFIPSMRCLFDRYHSVSRASDVEEFLFDTPYYSSESVWEKPKHY
HLRHSVSNHIPAATMLRPGTAQVLLRSLSRPIHADYWKDDDFERKPTIPKIHMPHSALKE
QVRRGWQGAHYVREMTVPTGRDKIKFSQWNDISP
>Cuni_T006026-R1  Name:"Similar to Farp1 FERM, ARHGEF and pleckstrin domain-containing protein 1 (Rattus norvegicus)" Cuni104:204666-261549(+)
MSDPRPPKSPRKGKYVNIRIAFLNDTVHVFQVPVKGVGLLLWEAVVNHLQLLEADYFDLE
YTNHNGDDCWLDKDKAVLKQIGSPDIPLRFCVKFYTPDPGLLEDELTRYLFALQIRKDLL
RGELRCSENTAALLASYIVQGEIGDFDIDEYQDPTYLAVFKFLPEHLQTHEFMAKVMDYH
KQH
>Cuni_T006036-R1  Name:"Similar to GRM7 Metabotropic glutamate receptor 7 (Pongo abelii)" Cuni104:740718-754265(-)
MVGVFKAVHLMKMSKMFIWVGSDGWAEQLMMLQGDYKEAIYGSFTTLFCAPSVPKFEEYF
RTIKPSNTSNPWFSEFWERHFNCSFRAGTCDESQDVASVNSYYTMPLISSAIDTVYVYAH
AIQSLLNDHCPGETGKEARECIRGDILLTYLKNVSFTGYSGQVQFDEHGNMGGKYVVSQI
LPGNPVKQVPVKIIDTRNNTVTTVGPISWDFIAPLQKAFPPDAILPSPPVPLEDKNIPVS
VCSRVCGVGEYKIQKDQPCCWEFSNQTACHACPAFSWPEPKTNLTTCRNIIPDYPTFTDA
VVIFETCTSCLGIIAAIGVMIAHVYYREAKVIKAASRELSFLQIFAIGMGYITMLLYVAP
PTHDKCAVVYWLFCFSFDLLYAPLLVKAIRIYRIFNAAAKGTRGLKLTSPISQVVISCVI
VMGQAYKTSHGFLLCSIFAFKTRKLPDNFNESRFMSMCVMTTLVIWMAFIPTFVTSSRQY
MKTLLLTLALLLNHSVALVFLFISKLYAVVCLTDETEETNSIGRTNGTPRYRTSNCHIYA
SSINVSMNQVGPQEHT
>Cuni_T006032-R1  Name:"Protein of unknown function" Cuni104:574349-615282(-)
MLEREYFMWRLDDRPEFGSSVGYHKNSDRLEQFDLKLMTSRMEKAQSYLELLQEIDVTKL
SKADKIDYTIIEDMLKTYVEGYEWRHWNNLSPLNWLEGNTRNPFYFVDSTPFDNRGDFEN
YIARLHEMPRLFEQYKTFMNEAIRLGRTVHKAAIDRVPNQINQILSTPEEESIYFRPFLE
YLNLLNGTIPTMEYFASESDVVIIFHCQTSDLQVYMNHTRPLWGVGSLEGGKEFYKACVN
WYLSLNMTPEDIHELGLKEVERLSQRMHEIREKQGYGGYSIREYFAELMKKDDMFLENQQ
DILAEYENIIFNRINPILNKLFKDQPGLPIKVESMHSDGPRGQYFPGTSDGMRPGTFSAN
TFRKVPKYIMVSLTMHEANPGHHLQISYELTAAVPEFRKNKEHSEKFRVPFAIPTYTAFV
EGWALYAESLGVENNLYETDYELMGYYESEIFRAARLVVDTGLHYFSWTREKAINYFLDH
TSESLDGIELEVDRYITWPGHAVAYKVGELMIRELRKYAEKELGQFFDVRDFHMVVLRNG
AVPLSVLTSQVRDWVKNHRKEHENDSDDCDECSTTPDPTKRSRCQRSPKENEPHSSGSGV
TYSQAFVILLFIRLTCILSKY
>Cuni_T006025-R1  Name:"Similar to Glutamate receptor (Lymnaea stagnalis)" Cuni104:106301-125352(+)
DPPFVMMSVRGDKYQGLAVDVLNAAISKIGYDKVSIDNHEEGVFGHEEKPGQWNGLIGEV
QNKTADVALAAFTINSKLSTVVKFSYPFMQAGFRVLYKIPDSWYPSEAMVTILRPFSPGL
WVLIVFMFVLASGALYMIGRFSPYEDIAFVGKTATYEGLNVTNSMLYIFSSLVWQSYTAA
PKSISGRILTSVWWIFTIFAIGAYIAGLCVVLFKVNPEIRTLPFTTMSEMSRQNKVGIMV
VRNSSTFTYLSNSQGLVERRVRAMLHTHQELLVDTVEQAIDKMTQSDGKYALLMDGPTAE
YLSTLEPCDKMVIANPLGFHTYGFACRNDSDICDRLSTEILEMWEDGRLLAMKEKWFHSG
CLESRPKSYVFEGLPFFDTFGGDPDAIMPLTITVKRFSAAFIILVVGIALAVFVLIVEIV
WAKRRGTAVPRKLNHSVVRDDDLERIENEFHDERS
>Cuni_T006035-R1  Name:"Similar to PCID2 PCI domain-containing protein 2 (Homo sapiens)" Cuni104:673878-713235(+)
MAKTSLNSYLHSVNEAVQNNDSDEAARLLSFRDPHVASPNLQLEKADAQCRRVLDSPFDE
MAAAHLRCCWAVANHDFAEAYNSQAVVVQSFLKALQSQKEENWALPVMFAVALDLRLFAV
NADIQLVAKNRGKAGEKLEKAAELLMGLFRVCASDNRAAIEDSKKWGMLNLVNQLFKIYF
KINKLHLCKPLIRAIESLPIKDKFSLSQLVTYRFYVGRKAMFDSDYKSAEEYLTFAFEKC
HRESHKNKRLILIYLVPVKMLLGHMPKAELLRKYDLRQFSDVSQAVSSGNLLQLNAAMQK
HEAFFIRCGIYLILEKLKIITYRNLFKKVYLINAKNHLIDISAFTLALKMMKVEDIDDDE
TQCILANLIFE
>Cuni_T006027-R1  Name:"Similar to FARP1 FERM, ARHGEF and pleckstrin domain-containing protein 1 (Pongo abelii)" Cuni104:296288-365209(+)
GESPSEADLNLLDTARKVELYGVKMQPAKDHEGVSLNLAVAHLGVLVFQHYTKINTFSWA
KVRKLSFKRKKFLIKLHADTYDRRLEGVSHTPTKSGRGYYKDTVEFFFETRDRCKLFWKR
CIEHHAFFRCQVVAKVPRNKTRVVSRGSSFRYCGRTQKQLVEFVRENIGKRPQFERATSG
RISSRSTSVTPKFSSKPSMHSSSADLHTSSGSRSSGSHILDSNHTPGSGVSRDHSGTPHS
AMRVESVDVHSDSSMSGSRSLNSPRLEHGLSIDQDVIEAVNARTEGAMTDDEDIDDVKDD
AYHPGREGMSHVASDTKVSALVTHGLSLKDRKLSAPVIGAHHKEEEDIIEENHRLSRTAE
IENIPEVVEEEHSIPVKLPLPSPPQRSSSLKVILQASDRSDDIDDLPPPPPSPPPPPPPF
EDDEPLPPVPDDITDENGRRDHTDGISLQMKASDVHSSQKRLEEKLQSLVVNDENYLIGT
KKRTDALSLSDRHIDMSAEDHSKFPSMLDEDSYQRHELSEVGDMANLSRMGTGGRSRGEN
G
>Cuni_T006034-R1  Name:"Protein of unknown function" Cuni104:659010-659943(-)
MSLTVVLKRKLFYHSFWSRHQPYFVIYYQRVEHLSLEKCFIHRKSVFLLNQTGIRLLSIS
LNKFNIISRLTSYFLKEKPQVNKAVKNLPEDLTDASKDSESSSSVEEKDEQIKKSNEEEI
DKNSRNLLRKHKWISLLGKLPGASLYNISLPVNAQLKEDSSAEDDLKKRMSFQKQINEST
EMFLEKYNKDLDLILKKATPPSASKRKVHNNHKHTVSSGESTADVIKEVKYPRIKAKNRI
PVKTENYEKALVYLQSLGIPCEDLEMYPNIQEMDKDTVLKCIDKLKEIGIHVVFSLFLID
RVSIEHKLNKK
>Cuni_T006028-R1  Name:"Similar to CAPN5 Calpain-5 (Homo sapiens)" Cuni104:453619-483526(+)
MPLFETVKKFKNQDYNKLKKECQAKGTLFIDTEFPPDERSLSSTPGKYGGVVWKRPKQIC
DNPKLFVEGASSGDVTQGKLGNCWFVAASSCLASFKEVWHKVIPDQKNQEWDPEKPDNYQ
GIFRFNFWRYGEWVEVVIDDLLPTINDRLVFIHSQSRNEFWSALLEKAYAKLFGNYEALD
GGELSEALEDFSGGVSDTLNMLEMDLATKPDERVALFARMQKEMDRKSLMAASIPATSAE
EMEASTDIGLVKGHAYGITCVKNVHLEGSGLFGLFNREKLPMIRLRNPWGQGEWKGAFSD
GSPEWNKISKSDRDKIGLTFDEDGEFWMTFEDYCKYFVQTCICRVVNTSYLSLTKTWHEG
LAHGQWKTPDRAGGCPNNQETFLKNPQYMFDVVDEGDECMVQLMQKSTRDKQGSQNLTIG
FTVLRVELNREYRIHDLYLHEKVKSTVYRNSRSIFLRHGPLKKGRYVVIPSTFDPGQQAD
YLLRVYTSAANNFKELTQEKPVKPWYNCCGKPPVMVTHIKVVKAVGLEKQDRTGGADPYC
IISCEGYKVTTSSSKDTTDPEWNTSGLFYRQNPVKNPIKIEIWNNNILRDDFMGKFLYVA
TDECKNQALEVALAGRKPETDAVRPGKLTIVVTQSRNLLSV
>Cuni_T006024-R1  Name:"Protein of unknown function" Cuni104:46414-58109(+)
MMSRFLFGGLCVWGLALYVTLGQEENPCAGAPDGKNIQLNCTGFTNCTNGKPVEVNCGNG
TVVERDSFTCKPIGTGNTICGTSGICSSKGFQASPNCQSFFFCQDSLFSNISHIYCPGVL
LFDGRRCNFPANVSTKCEPIK
>Cuni_T006030-R1  Name:"Similar to TTE1956 Protein TTE1956 (Caldanaerobacter subterraneus subsp. tengcongensis (strain DSM 15242 / JCM 11007 / NBRC 100824 / MB4))" Cuni104:527869-538280(-)
MYLLFLSTISSLLHPAASKILANFVMPHGGIALDPTHFNATNSTALEQAWEIHRACKQVG
EEIASLKPELILLSTPHGIADLRNFVLYLNPVASGFADTDNCDCPPCCYNATVNVDTGMS
QFIVEALGYQNNVSGLSGYGPPGQSSEPFPLRWGEVIPFHFMPGLNESKVVILSHPSRRY
SEDVEMIPELLKLGSSLYSILETSSKRVVIVISADLAHTHSASGPYGYSNASEPFDEACG
KWATSLQPDYLLTTAASLVDQALSCGYTGLVTLHGLMEAGDIATWTPSLRVNHHPSYYGM
MVASFYRSDLFPVSVHVEK
>Cuni_T006033-R1  Name:"Protein of unknown function" Cuni104:647094-655640(-)
VKKLREVGATAKDIWSNLEILQGYDLFDDKVDLYMKSQLVGKGPFPVHLFLAKSMSSFRE
QLAVGSEIDVVAQLLDVSVADIRGCWGFRKYNTEKLQYKVKMCLAAGISKINIFNNLGEL
IKLPVEQCHAVTTCFRASGLPASVFVLREMVSAAKLNGYGSDRGPKNKNVHSENTVQTCA
DICTAHLDEDWVGDSKMLCPENIQVPTVENNHLGLKYSASSTKKHRRMILELINHLLKLD
RAMLTTMLECRMDVSSVLMLDVQKNLEYLICKHYTRDHIAKCPLILAHPHRDLARVISEV
DRLIMLQLQSALVPPSSSDSFSDLLSRPSLTFEAVVGGGGKALKVKLVEEIKMENLYVFR
HSLLASPEQRLNAFQYFLEKETSFSLASVD
>Cuni_T006038-R1  Name:"Similar to THBS2 Thrombospondin-2 (Gallus gallus)" Cuni104:811858-823823(-)
MLQMDAQCTCFVIVTLLILVFHSLSPVEASDDTKGHWGPWGPLSPCSVTCGSGIANMERV
WIPGPDEQDAKSFKNPFTFTQVFSCTDETYPECPQNGTWSGWGAWSGCTKACGGGIRERH
RECRGQMYGGRPCEGDKFGKEDCNREPCPPLPRGFDMSQCEEEANFTCSSQKMCIPISQK
CDSTVQCHDGSDEDSCPSFSILWGNNIRYDLTRGRNGARSSYSSSVHHLFIYLVFAMSIM
MMLH
>Cuni_T006039-R1  Name:"Similar to Adgre1 Adhesion G protein-coupled receptor E1 (Mus musculus)" Cuni104:900650-911797(+)
IDECRQRGLCPAMSKCLNTVGSYQCQCNTGYRLNGSSLCEDIDECNKTSTFTCPTNSNCT
NTPGSYTCLCIKDTRRTMMSVKILTSARALARSPVLHTVPAVIHGEAIFASAMEDTR
>Cuni_T006023-R1  Name:"Similar to PGBD4 PiggyBac transposable element-derived protein 4 (Homo sapiens)" Cuni104:17926-18877(-)
NVSIGPSLFRSAGSGIQAPLDENLTPLDCLLTLLTTDIIDSLVENINLYAVEKIKKNIPL
RKRSTLSEWQPTTREICFHFLSVVIAMGITPKHDIKDYWSTMNHKFTPWFEVMFPRTKLL
LIYQSMLHASEPNAQSQAKTEPFVKNLVAKFQSAFYPYENFLFHAKQYNAAKPHKYHIKT
FGLWDSITGYVYNLLIYFGAKTAYNPMLDPTSTHAVKVFLTLLHGVASYHHLFADRLYIS
LPLIQFLLSRKLNYTETVNKNRKGLPQQLKQQPTIFGTPRWLVNNEQNILCVSWRDKNPK
NLASY
>Cuni_T009912-R1  Name:"Similar to Nipsnap1 Protein NipSnap homolog 1 (Mus musculus)" Cuni1040:56112-69404(+)
MLRSRRNQILMSFNFWPQIQPRSGSNIYELRSYTLRPGTLYEWGNCWAKAIKFRQTNNEP
VAGFFTQIGHLYCVEHMWGYKDLQTRKETREAAWSRPGWDECVSNTVALTRHMHSSILIP
TPFSPLQ
>Cuni_T009913-R1  Name:"Similar to Ccdc65 Dynein regulatory complex subunit 2 (Mus musculus)" Cuni1040:75651-99161(-)
LHNERLDMISREYCQQLEMICEEFDLERAMLKEHHHTEMNNIDDILYAMDAMHQADESEA
LAEYEMMEVEIKNKSLEGKQALRLKLGTKIEELWQQFRQMLHNCNEINEDRRTAFDIIKQ
KDDKRSKEIDINNRKLARLEKQIRQLRAKLRARTRGYDKGEGSAKDDDEDEAFNRAERMR
LAKDFHQTKEEINQVRLHASEKLVRLIIDSSKAVKELRKQIDKAVSVLKLAEICRKLETE
EEKLVPFYVSSLGEQKNLKNVAVEPSSRLLAEAMQDCYGLENFWKRYNKVLLDKLSLDKE
KDSLTAENQQLRRLLKQYMDSISVNEQVMNQNNPLLVVKNGLTSCKMPEMCTCLRQAPPK
TVIEAAHVARQLLN
>Cuni_T009917-R1  Name:"Similar to sup-9 Two pore potassium channel protein sup-9 (Caenorhabditis elegans)" Cuni1040:238414-253035(-)
MPRARLASFDDCTITVASPFAEKGASSDVNGVMSSSSPLPGSYSDDEKLIESRTDQYFGD
YNTEHTYEPPSTSDFPTSAFRDTSIEEETWLAPFHDYDLHHDPVNAHYQHDLIAPAGEDL
RHDADRQHLSPRDRLFDAAIKVQAVVKLTRVQRLKKRARWLTKKVIVFVLSHVGLTTLVG
LYAVAGGFIFQRLERNMGFMNAEAPQAYRVVAIRANSSFPDRTSFEALRVKHVEDLWNLT
LSLNVLQPEVWKEIASADLELFEKDIYQAMLHLVRDVAEPGLPVTTTTARIPGDTHSQPL
TTDWTYSSALLFAVTVITTIGYGDTVPRSWEAKIVCIVYAVFGIPLTLLCLANIGSLLAS
VYRFTWKHASHLALVVVRAPERNKPLVRTSQVRVPVWVSLMTMIVYILGGAAIFSEWENW
TFLEGSYFCFITLSTIGFGDYVPGKDTETLDSNVKRVVCALYLLFGLALLSMIFQLIQDS
VTIVVGRYASFLGLSEAQIERDILEPEVTVGRKTEPADGCILEDNVETKDEVAIGDTAKT
IFPVSVPEFSDKEVLDKHCRFDDATNRMYGLQRVRSLPIHRTPRKAYRNVSRLYSVPEEK
VLRDISCCLDKPGGSLDVVIQTNVGDVATNGRYRKHSLPSVLVDKEKLQA
>Cuni_T009914-R1  Name:"Similar to Temptin (Aplysia californica)" Cuni1040:152394-183459(+)
MSSVSTLVLALLLPMVRPFMHYQKRIPNGDNIPFPCKPGKIWPGLGHFNDEGTGPRNPFG
LRFEELESIWTKEFCLEDSDGDGFYNGLELGDPKCEWTEDTPVAEKDGLSHPGICDPWDT
PRCKNMDISSFSDKYKTQGEWMEDVCQSDGLVCPALEDKDIMNITLRLPPRTAVPTDTTS
YICINFNIYNHGVPKGRDFHAVALTPVLDNKQVVHHMALFGCKGYMEPNFDPYMCQIVPN
PSCQEFLHVWTVGLDGECYYPDSGVRIGETGVQFMVIQYHWTNMQKIRGLTDSSGLMVHF
TPNFNCASGCTRTLIKHSINITSAWNHMHLLGLDMIMEVLRNGVHVAYITHDKVYSYDSP
QVKEPLELFPGDSIVTTCGFNTLGRKEDVEWGDGTLDEMCFGFITYYPRVNLTSPTCLEI
MGL
>Cuni_T009916-R1  Name:"Similar to Temptin (Aplysia californica)" Cuni1040:196384-233095(+)
MVVSLVLALLLPLVTSYLSFQKKIPNGELVPFPCRPGTVWPGVGHINNHGTGFQNPFGLD
FEANGYRWDKKLCLMDSDGDGYSNGLELGDPNCEWEENKIPEMTIGLSHPGICDPHDGEE
CRRKKIKSPKYLSQGEWLTDVCNNDEFKCDALKDKDIINITARLPAGTPVPVQKTHYLCQ
LFNIYKLGIPPKKDYHIVAITPSIDKKLVVHHIIVFGCTGYVQESDSPFACDVTPHASCQ
EFMYLWTVGMNGECFYPDTGVKIGKNGYENFIIQYHQSNDQLRAGMYDTSGLIFHITPNL
KRYDTGVFAVGSTYFELPPHLNYTVIKSTCASGCTKNLLTGSINITAAGNHMHLLGKDMI
VELKRKNYHLAYITYDRFFLYDTPQVHHYPLPIEMFPGDSVVTTCGFSTLSRDDDTLWGD
GTTDEMCFGFITYHPKQAVLRPSCVDIMGFGMCDDNALEGCTSLREFLTNIKDTRVFREV
SQACKQGASICEQRCAVTVLKHMKMESCMKGNIWRYIKNELSKARGHGFEFLSRIAPCRG
EAEKAMLEDPDL
>Cuni_T009915-R1  Name:"Protein of unknown function" Cuni1040:184215-184535(-)
YKPHTLRCTNHILSPVQTTYSHQYKPHTLTSTNHILSPVQTTYSHPYKSHTVTCTNHILS
PVQTTYSHRYKPHALTCTNHILSPVQTTYSHQYKPHTLTSTNHILSP
>Cuni_T009919-R1  Name:"Similar to Rad51d DNA repair protein RAD51 homolog 4 (Mus musculus)" Cuni1040:276233-293840(+)
MLKVGICTALNQDTVRKLNNAGVVSALDFLLRDPEKLAQELHIAYKDTCSIRRVLLAEHS
AYPVSAATLYQTALSSLTILSTGSESLDQLLDGGLYTGELTQIAGDSSAGKTQICMRCAA
TVVGTDGQSVVYMDTSSGFSVECFVALLSEDLTQFPARAQTWLQSRLKHVSYVQTFDVFE
LFAALDTLETDLTKQMLSGCQTVKLVIIDNIASVIQPIMGGRSGHREGFLSQIGLKLKQM
AIHFSLAVLVRYGTVRPAESASSSSSTTPTAVVSQEKGLREVCLIKSNRQV
>Cuni_T009918-R1  Name:"Protein of unknown function" Cuni1040:271946-272098(-)
MPSLANLVRQVHYTIFRRTSTFVLTAIVLAYPFERAFNVATEQYFRQVNKG
>Cuni_T009921-R1  Name:"Similar to OLFM3 Noelin-3 (Homo sapiens)" Cuni1040:321520-328856(-)
VSTLHDQLRRLRKRLSKEITRQEFLHGHDLTSKSAGKCPKQISAIGRGTAKDMQWATGAY
MVQSVNAKEHRSIFIMADSGPSSELREYYSSAEIDYNLVGNDLFDTYPRHCLVVKYHMSL
YVSRRHFYCHKTDTNLIVKYNLKRKEIVSELALPGAKFGNSQPYTSGANTDIDLAVDELG
LWAIYATDANLGNMVIAKIDHKKMEIERTWSTTYLKRQVGNAFMICGTLYATNSHSHSPT
FIRYMYNTETNKDQILEDGVVPLANSASLGLVGATGAPIGNKASNSVMLSYDFRTSSLYS
WNNGRVELFPVYFRENA
>Cuni_T009910-R1  Name:"Protein of unknown function" Cuni1040:30509-37854(-)
MASNMKKAGLVIRKSFRSKRYAAWEKENMSKSVTTADGETTGETSQYRARSLSTSAWSGE
DENGDTSTLANPGTPAATRSQIWLKRGTSMTQSMRDAVGNLRQKMRMSTRRSRLNVTVTK
VGTRRHTLGGRDAHLHSAAKVSSPRSRVKTSLSVETPTRLRREVESLTANMQALNALTPN
AMEGRTRTRKAPPLTNGSLKTPRVSHRRVSQV
>Cuni_T009920-R1  Name:"Protein of unknown function" Cuni1040:311856-317313(+)
MKATSVIENILLILFGCLAQSLILAAIQTCRIRLNPDLNDHITQSWLMEDFMLRNSSAKL
ECASRCLQEKSCVTFMVDRTRKRCRLYAARITRYNTLVDAVGFRSYDTCRGGVLGEVCST
DDDCAMLFSVCAGDTCQCDYGWSYSPNDLACVKDCVQYGTEFTYFTETFLSLHHHYIS
>Cuni_T009911-R1  Name:"Similar to Nipsnap Protein NipSnap (Drosophila melanogaster)" Cuni1040:41051-54749(+)
MAGLGRVLGSRPLQQLFSAKFVSVSEASVSRFPHIHTATALLKDNKDKDQDDDDDSSKGW
FSRFKKISKPEQAHSAVLAGQEAVYEFQYHSVRPEYMEEYLNQFGSFQKLMKEKGAGAEL
VGSFTVVIGEQDEAVHIWQYAGGIPSTDSG
>Cuni_T016823-R1  Name:"Similar to glyQS Glycine--tRNA ligase (Nocardia farcinica (strain IFM 10152))" Cuni1041:309663-312724(+)
MAKQNFSIFVQLLKSRGFINLKHVTRNDKSFFLADYGPPGTLLRRNVLKQWWKVMVLQQS
NVFPVESSVFLPSPNLEASAS
>Cuni_T016821-R1  Name:"Similar to ACHE1 Acetylcholinesterase (Culex pipiens)" Cuni1041:26383-46062(-)
MDVDTYLVLVYWHVAMVTLQSLFAQGHKTLVMTDKGQVQGKTYYVHGKKVDVFYGIPYAK
PPLGDLRFLHPEQLDPWPGVLDATKKPNCCIQLPDTVFGNFSGSSVWNPNTKVSEDCLYL
SVWTPRTHPPYTNKAVIVWVYGGAFMTGSSVLDIYDGKYLATENDIVVVSMQFRFGALGY
FVLGSPHSPGNAGMMDLRMALEWIQRNIHYFGGNPHNITLVGESSGAVSIGLFMLSSLGR
GLFHRAILQSGAPQAPWGTYTLQEGRRRSLVLAELLGCDPKASDRIILQCLRKVPAMRFP
EEEIRVVEGVAQFPFIPVIDGTFLIRTPSQYLREGHFKKIPLLLGSNANEGSWLLVYAEP
AYFNINTPSLVSKESYNIVMDKLFRYYPQYPNELNHLGKEAIKFQYTDWLDPYNQSRLRT
NVEQAVGDYHFTCGVADMAKTVSEHGLDVYFYRFSHRMSTHSWPEWMGVLHGDEIFFVFG
QPLNKEMNFTGDEKKLSKKIMKMWTNFAKTGNPNRGPGEMEIQEWPKFRHNEQLFLDINL
DLLGNGNKWGKGVRPEHCAFWEHYVSNIAQMS
>Cuni_T016824-R1  Name:"Similar to Polg2 DNA polymerase subunit gamma-2, mitochondrial (Mus musculus)" Cuni1041:319628-332635(+)
CVSKYLQVLKMTNGRLPISIVSTGSCLSWREVQADEPEEKVLLFGCSNVSRVLLQNYIPP
TGVSAVFDYWLQLRLSWWKKFSRHPANFSVTSSSSGESGDCLASTDASKSNSQSPYKMYI
TYDFPWGPEPVEEVTNLGDKLLAKLHKDGDQSYKGKTAGNKSCLPHCIECSSNIEAATAA
WLIDSFHERRSFSEARKQESLRTSSVLQLHPHIAPYQVAIVMSLPAASSASPVSSLEMRH
ICDQLEKDFQEAGISVFNMSLHGSTVEAHLKRNDQLGIPYTVIVTDITVVDGVVKTRHRD
TGIQSESHISSTVDNLSRNLRAKLEVTE
>Cuni_T016822-R1  Name:"Similar to DAGLB Sn1-specific diacylglycerol lipase beta (Homo sapiens)" Cuni1041:270816-305873(-)
MPGLILFNRRWAVGSDDFVFPCLAEALVRIVWLMILAIIFASHHYGLNCDHGSELRAFYI
GSLVLNCTAIIILAMLLHISMQGTIIDVIPRRNINKWLYAKLFLFFLELVWLCISTYWAF
AHSFTCNWTIVMTARGAIICTWVMAFAIFVAILIVFDPMGSVKQRQSISCSMRRGNEAEL
IMAEASANKVWETRCRVLCCCIACNPDTRQAFSDVSKVIAAFFEEIDLVPTDIAAGLVLV
QQQQSNRSSLLASVVSPRSSLQRESVMLRECGASAIPEPKPWMTIPSMLHYMKYAMGSYG
WLFFIYDHLTTGVCQLCPYYRFGSCVRTSNSVMSDNCCQCNTAAIKELTGISDEDLIYVT
FHNKFKQVPFYVVIDRETQSVVISIRGTLSFQDALADLSGTGSTLEIPGISHSYCHSAML
DCANYILEQLQSQQILATAFARLQTESKLVITGHSLGGGVAAILAVLLRPEYPDLICFSF
SPPGGLMSPSARRYTQDFVCSVILGQDLVPRLGMYTLMDLKVSILSAICNCTEPK
>Cuni_T020944-R1  Name:"Similar to Trim9 E3 ubiquitin-protein ligase TRIM9 (Rattus norvegicus)" Cuni1042:301626-302420(-)
MEDELRCPVCCRVYTKPVLMPCSHSLCVACALSCQEPAQNLLPHSLSSAGSESDSGTVIS
DRTSLLDFPDMDKLSIVSETDSGVVCNSRPSSYIGTASVANIFLQSLQNCTYGIKCVVCE
RMVFMDDTGALSLPTNRVLEAILKCERCLIDHRPATAMCEQCEVFFCDICREQCHPATGM
YAKHTLVDPTQGDIILKYKKKNSKEFKCNEHPSESLGMFCLSCRLPVCCQCAQDGRHMTH
EVQPLSSMCKSQK
>Cuni_T020942-R1  Name:"Similar to Trim9 E3 ubiquitin-protein ligase TRIM9 (Drosophila melanogaster)" Cuni1042:104008-159622(-)
VSPGLISRVATADQNFNKEMELAPRVSPEFELTLDNKPAIRAIENMSFFQMKAPGHPVII
PEDCSCENNSVTIAWAPQMGSVVEAYTLELDDGHGGDFRVVYVGREVLCTVDGLHFNSIY
NARVKAHNHAGESGYSDIISLQTAEGRDVRDLSSFDWYELGGILERLSKV
>Cuni_T020943-R1  Name:"Similar to Trim9 E3 ubiquitin-protein ligase TRIM9 (Drosophila melanogaster)" Cuni1042:207828-208061(-)
GNCTEFEKAVVAQCDALIEVIKQRKAELLENVAEEKAMKVRTLKEQVSDCTALLQRTTGL
LQFCIEVLKESDATSFLQ
>Cuni_T008733-R1  Name:"Similar to Commd4 COMM domain-containing protein 4 (Mus musculus)" Cuni1043:208439-225664(+)
MRFRFCGDLDCPDWVLAEINILSKITSVKIKLLAVQVLKDLLGEDLDYEKVQKLTSDAKF
ETGDIKASIAALTFILSSAAKYDVDAETLSNELQQLGLPREHSTSVCRSYSDGLGHLQEH
FRRTSLRVSGLDSVQWRVDYVLSSSELQNVNEPSVQIKLDIKQSDSAEPEPVAFTLTADK
FRVLLHELKQAQSAMENLQK
>Cuni_T008737-R1  Name:"Similar to NEO1 Neogenin (Homo sapiens)" Cuni1043:360635-406295(+)
IAGTDDSLGESGPEVEVMTLTNDGLQPANVTVKALNTSIIQLDWEAPSSISHMYIRGYNV
YTRREGEDRTEKLFVRGSRSKQFLIGLGRDDTYYLKISTLMTWGYEAHSPWIRIQKPSEG
IYCIGYKIVYGPLDDPLNISRATLEADMKKHIITGLMPSTKYIISIRAYNNIGDGEPVYT
RTLTQASPPSMVQNAVARPVSSTEIHVQWDPPKRGLVTQYHIRYWRPGHKDKQSAWLAGN
FQNYVAGSLRKRSNYRFEIIPYHGELLGEGIVIFSQTYGDKPDGPPTDVSIHSHNSSALI
ATWKPPDPEKSNGDITEYKLVLRAKGGSRITSFTVPGTARSYIFLNIPSSRTYKFRMAAM
TVNGTGVYSPWIDCAVSSHYLVLHISGSPVHGYIVGYGQFIPEVYKQILTASQTTFTIKS
LKPDSEYITSVRAFNHIGESSPAFSIVRTRTTPLITGLLAPVKLVVQSASPTSLLLSWVD
PGLNGNQKKSDGRAYLIRFSPLTGETYSYVNTSSLHLELSNLEPATKYEVSVKVVRGNNS
SSWSLPVVNSTQQIAPSSAPKNIIVSPLPRSPSLISLRWSPPSSPNGKIEEYIIYLTSDP
TLDTKLWVVMRTDKQQVKITDIIPHTTYYFKLQARNQAGYGPLSETVAYNPPTDIRAAPT
NVTVTGLYGNMSRTVKVSWSVPQVIMDQITGYMVYYTDNIHEDADWLVQAERGLDTVIAG
LDYNKTYYFKVQARYSAAYGLFSKTASYITEPPTMETSSTVHSDGAIKQRSTSNRGGDDN
SVNDEENASFEGNTSSQDINATVSDGSVNNNITDKNTEESTRKNTEDSTDSSSTVLTHQN
ITSDYDDVDYEGLKFDDDNEGNFSDSENIYDNAENDKHSENYGEDYSESSFEDNLSVFSA
TNLTSNVASIPKGHFDSNSEEDQDQLDNVDSETTNIAYEYSNTFNNTSNIRNLNSSLGYT
LEKIGIIDVPDVNGNSSKDADTADKSFQLD
>Cuni_T008736-R1  Name:"Similar to Ptprf Receptor-type tyrosine-protein phosphatase F (Rattus norvegicus)" Cuni1043:332572-353443(+)
MMVIRNYNWKTPSAPRRVTAKAMSPHAIQVIWRDPDLNGKDGEKDSRHYIVKYKEVNDLV
NGSDFVNTIRSRQLKVKINKLTPKTTYDIWVKTVKNKKASSWTKANQHIQVLWQPPVASK
LNGQTVGYTLQYKHTGTTDEDIQTVTLADTLHHTLTDITDNETYDVRLAARTVNGTGPYT
GWKSVFVPQNSDEGLNLSDHLKLDLVVPPPSDVKVVNKTSTSIFLVWSVDKIPECCPVVA
YKIVISNYNDSSEYEIVRGTAHVHLMSLTPSTLYGVTITALSTTGESSPSKETLFTTLEA
DIAEQVKIVSGFKNEDTLTSSLFLHKVRREAGREYICIASNNVGSDKSHLYLPVYETPRI
ITSHGISVTSGSVARLACEAYGKPVPDIIWIQSTSGTVFDEV
>Cuni_T008738-R1  Name:"Similar to FAS1 Fasciclin-1 (Schistocerca americana)" Cuni1043:419960-449073(-)
MTVVGGHVTATVHLQDIYCNNGVIHIIDKLLHTPTQTIAKDVAFRNEVAYSNVLINVMND
DSYDLDSVNENYTFFVPNNDSFSYLPWQTHEKLFNRNYSEKVMRAHIVKGETRTLDEISS
GSALPAINNVIYVLKKDKKIMVSSNNVMAEVVKANIPAVNGWIHVIDRVLTVPYESVSQI
LSTKEEVSLFHHMLSTLPEYKELVTSSPRNVTLFVPSSRYINTLTTQQLARIKQNLDILR
KLFYGHVLPDVRLDDVFLRQYPDEDYCSRSSYNVTFKISRKEDTLYVGAGYDILPLDVIG
RVFGCTDGIVYVIDGFLNYSPFTVLERLKREPGLSASFELMEQMVSHHDVNMLGNANMSF
TFLMPDDYALDYFSSSELQMLNRLPDVEKQRTFWRHSINGSTLYYEDLKNGHIISDVLPQ
EVAVDIQNEAVYLRYRNVHSKIKQWNLIASNGVIHILQKFLYYAALPGDKTTPAEDNPDD
PLNRVERWEQTGIATRISMAWIKIILFAVLVILTVRYPLFVNDS
>Cuni_T008734-R1  Name:"Similar to efcab1 EF-hand calcium-binding domain-containing protein 1 (Xenopus laevis)" Cuni1043:242577-253006(-)
LEPNLVENVLQYAKNLVVPGTHDITDNVFMSQMMSRFHITSLIMVNQMFEAKRRSIPLED
YCWCICIFLSDDIDLKINWVFSVYDANDDGSLSRMELYILLKPCVLHSDEMETEEAIKDL
IDIVMAVVDVNKNGSVDLEEFRILVKKNVLYIDLLGQCLPQKQAVKG
>Cuni_T008731-R1  Name:"Similar to tnrc4-a CUGBP Elav-like family member 3-A (Xenopus laevis)" Cuni1043:105219-154200(+)
DRKLFVGMLNKSQTEEDVRQLFHAYGNIEECTILRDQSGNSKGCAFVKFSNHQDAVAAIN
ALHGSQTMSVSSPWGASSSLVVKFADTEKERQLRRMQQMAGPLGLLNPFALGGYSAAYAP
VEAPYELARVGSYETLAPQPLYTKQTAALQSQQLMQQQAALMAAAQSPYFSTPVSMLSTQ
VQQLTTLPATPNGLVSTAITPTTATLGSGTPTPVTINGGPPSMLSPTAMASFAMQPSNGA
TEIYANGIPHYAGIYTAAMTNGDPLQAYAAIPSYAGIAYPAVYGSFPQLTQPATLLPTAQ
KEGPEGCNLFIYHLPQEFGDGELAQMFVPFGNVISAKVYVDRATNQSKCFGFVSFDNPTS
AQTAIQAMNGFQIGMKRLKVQLKRPKDANRPY
>Cuni_T008739-R1  Name:"Similar to FAS1 Fasciclin-1 (Schistocerca americana)" Cuni1043:460063-478743(-)
FGRVLVSRNLTNLLDIDNITIYLPSSDAFFKYDAELGEATKWATLLTYATQNGRFTLAHL
PKEGKIKSRLGPDRFLYVNTFYIGGRQVTTINGASIIYADIITDNGVIHILDSIIYPIGS
GLTIAQYIEKPEDAAFTFSAIVMADIVAQSLKRKTNNTQALITSFSPNDSYLVDMAEYGK
TPLFENITLLKEVYEAHIIENEALFLPYEIAEIPPKRAMFGTLRFYRRGGYLYVVNNRVH
ARVVKPNIPTTNGVIHVIDNLLRYVFHNAVQITNDDNINSTRMFNKCIKALAEDQLSRLA
SATLTMFIPSDFAFSKSPLFWQRPRFAPGHYTNIVAKHVTFGQVLDAVSLYDGRKLVISQ
DQVLTVVHSDGEIFLETADKKIRSRISVTDSGVTNGVVHLLDNLLTINFTIWEAISDIPA
LRRVYDVISKDIGDLRHMFNTGSDTLTVFLPSNMVFDEHRDIIQSMIQDDPEGFLE
>Cuni_T008732-R1  Name:"Similar to Ras-related protein Rab-11B (Diplobatis ommata)" Cuni1043:194590-206371(-)
MGTKDDEYDYLFKVVLIGDSGVGKSNLLSRFTRNEFNLESKSTIGVEFATRSIQVDGKTI
KAQIWDTAGQERYRAITSAYYRGAVGALLVYDIAKHLTYENVERWLRELRDHADQNIVIM
LVGNKSDLRHLRAVPTDEAKAFAERNNLSFIETSALDSTNVESAFHNILTEIYKIVSQKQ
IRDSPNDEISPGSNVQSITVAPTVNPAQGRKQCCS
>Cuni_T008735-R1  Name:"Protein of unknown function" Cuni1043:298756-318227(-)
MDPNRQVPVPMTSKDRTSFIGLWLYSLSVTTVRGQGDSVCPVNSAMGLCTELAKTCFSDS
DCYSGEICCPEACSRTCKSRHATKQSSEGSIPDLLNDPRVYVGKCPDASCYSMFGGDPNE
CSTSKLCPGGQYCCNDGCKNVCLWKPEYASAIAQEQARARQHQQMLIQKQQVEMRRKQQE
MYIQRQRQLVSLEQARQRAEARAAAEVELLAQQKRASFEANLRAAAANQVKISSKQLGQT
VAQLNTGNQQTSNQLSLQSSPAKNDFLSNFENKPQTNNTGINLSGSSLAPQQTASTAIAK
NSTPLKKDNLPVSFSNHINSPASLNPHNNFRSQQNVGNKDMQEPLTISQSVGFTSEVQVP
KTMTVSGSVNPVLTYLQSLPGAKLANTNLLRQASSLRAFPTNLLQHSSSLNSVPGAYSGS
SNSISTFINRHFPQQSQNNVNNQMPVQSQSRVVQQIPAVNAARNQSPAFINRQQPFVTSN
QNQSPGYPRPNPYQGLGQRMSYLAQTPDRVNQRKLSLPVAYRAAGQRQQQPQQSAGSLSG
RGYQSDNMNTYLMFDMMQTAV
>Cuni_T012148-R1  Name:"Similar to SLC22A16 Solute carrier family 22 member 16 (Homo sapiens)" Cuni1044:182508-238841(+)
LSFANFVPKWCCLPDNLTAIQEEHCREEDQLNSSMFGKMCQVNETSCSRRVFATGARTFV
YEWDLVCERKWMVPITTSIQMAGLLVGGLLAGQMSDLLGRKKTLYFFTATTAVFCFLAAF
STSWEIFVSAIFLIGTSLGGYLAAAVPYTTEFVLLSSRTIASILPSFNIGVCLMALAAWR
LPHWSTLYWMCGVMITPLLLPYFFLPESLRWLTVKGRVDEAQQVVEWIARWNKQEVPKDS
LEVIKAVAEAVKMSEKTTNYTYIHIYKGWGLFKSSVIIQYIWLALSMCSYGFAFGVSSFG
SNLYLNIFLMQVLSIPGVFAVTYSTSKGLGYGAANVYSRVGAILAPFLLNFEEGPTLALA
MVGGSLLLAACAVCFLQETAGKALAESITVAGKTTINQLETEAPKINIFVIEKAANTNNV
RDDVGDAPSKNDINVARHRRFTAYFQQPEPDQTYSDVGSHCERLSFSKYSLHIIYISYTN
NVIRIHVFIYKLSFANFVPKWCCLPDNVTATAEEHCREEDQLNSSMFGKMCQLNETSCSR
RVFATGARTVVYEWDLVCERKWMVPTTTSILMAGLLVGGLVKKTVYFFTATSAVFCFFAA
FSTSWQMFASAIFLIGASLGGYFASAVPYTTEFVLPSSRVIVSMLPSFNFGVCLMALAAW
RLPDWSMLYWICGILITLLLPPYFFLPESLRWLTVKGRVDEAQQVVEWIAHWNKQEVPKD
SLEVIK
>Cuni_T012145-R1  Name:"Protein of unknown function" Cuni1044:103052-113019(+)
MATKSPLVVCLCIEDLDCAFCDIVINQIATGHFFGPDQPFHLVFHGTNDVYKLGELCQEV
QDCAFPMITDVSWQTTFNEPSRCPDIVLVLLSCRSVLYTRDKPTVEQFQSLLNLVSYMSG
LSDLLSVIRMDALKIIIAGDLALTAASIMSHRMNTLTARQLLAIDVYQNSAASDSGYSKV
SRICDTVRQWWTGIKTSASTYLGVKYINYTKRATRNQQTGYFFSAPVNMTGPMSFLSDKD
TPMNRDFLAEVKATTDAAFSLLYATEGQHSDSGRHQSSLCLSYL
>Cuni_T012144-R1  Name:"Protein of unknown function" Cuni1044:70700-80336(+)
MASKHDPDAFDNTTMEMLSANLPSNAFVSHIPDPRLERARQETERTNQLTPLLKEELRLR
ILSKRLEKGEPDIEINSTEPRSYELTEEEQAKRERRKAQNRRAAKKCREKRKMKTLSDAE
KYRVVRDENQQLRNDVTYLRHKEAVFSKFCLEHILNGQCPTASSDEPTRNRLVTLLGLNV
KYVHPSRRQTQVMSSPLGSRTHQNQMEALSPGVFTQQFFQRQEACTSITSQLPSAAAQAV
YHAEQNVTAIPELEELPVHEISSLLPTEPDFSDHSMESSPPDLSPTSLFNAMSPTPIVMT
SSGGASSSFFTQLTPSTSFSSNNTSSFSCSNDDIFVASHSGVNSLCPDSICSNGQLSPKM
SASYIQEVPNCNLEMSRNDHAAKSYGDISSSPVIAWQTGKHFFQRTYSGDPNLNSVVSSD
NSKPNEDGPGVLSRTGVSNVIINTANFNEFLLDSFITSYLKTEQTDGVDSYLSSCDGDHI
AQIKPDSPLSPVSLSSPQVSLSPRSPCSISMETKFKDCSSLQFQPTAAGVSQCYNSTTPN
PDTPAHHVVRRASSTTSVPSPHFNHQVSITLSPPPSVPSPNSSGVPESPSILPHYSPVSS
ATSDDCSPARFYDTMKDDIN
>Cuni_T012147-R1  Name:"Similar to Tmem260 Transmembrane protein 260 (Mus musculus)" Cuni1044:119379-155998(-)
MGADNKETVAAFVVLTATFAVYLKCLHPSLPGGDSGELIVAAYEVGVAHPPGYPLFTLLS
QLFICCIPVGSVAWKVNLLSACCGALCAFVVYLLIYRLTVSHSSSLLGACLFSFSRLTWT
WSVSAEVFSLNNLLVACLMLVAVKFDGAEQESLVQWALMGSFVCGLCLSNQHTSVVYVAV
MVPWALYRLWKNQHLTPAVIVKLTVALMCGLLPYIYLPVAAHMHIARWTWGDQRTLMGFL
THLLRMEYGTWDLLKNHTGQGLFPGLFSVTYASHCATHLTCFPTVADTRQTWLLLCFTSR
WLKKLFSHCCRYKTNMVVVMFYIMLFLYLVFFCWRANLDIKDPLLFRVVERFWMQADLVV
IVLASVTFSDICRIIGNSWNIDRLPLDMILVLAVIGSHLSNKQLWNTCDHSSNFVVHDFA
VQTLQTFPSQAIVLTKGDLPSNSFRYFHLCENIRPDLTVFDQEMLTYEWSLPMTGSFYPG
IMFPGDLLQIYSGLRPDNRVAFRFKDLIDANYESHPIFACIGIQDHEPSWKESYILWPFG
SCWQIIRKGTVLDISTWTSITSHLADQWKYPWTSANDGTWEDIANSEMWNAKISTAYFYL
ELASSMPDGHKEVTLLLLESYKLFTRAIEKERSFPALWHRNYAILCERLQRVDTTLDRVM
LLKKAIFHFKKYVHQAPDDTDSQNIRHAVATLEDYMNSLTRV
>Cuni_T012149-R1  Name:"Similar to SVOP Synaptic vesicle 2-related protein (Pongo abelii)" Cuni1044:248490-254955(+)
PGSDQKVTTETVLNLLSRAFLSCAWGSIGIATNETYPTVIRGLGFGASNVSARVGAMLAP
FLLNFEEGPTLALATVGGSLLLAALAVCFLQETSGKALKEFIADVGKTADKQRENESPQA
NVYVTKNDANTNDVVGDGGGAACKNESSRL
>Cuni_T012150-R1  Name:"Similar to Slc22a5 Solute carrier family 22 member 5 (Rattus norvegicus)" Cuni1044:276614-298048(+)
GDLVCERRWMVPLTTSIQMAGLLVGGLLSGHMSDLFGRKKTLYFFTATTAVFCFFGCLLH
FVLPSSRGVVTVLPSLNVGVCLMALAAWRLQDWWMLYLICGVMMTPLLLPYFFLPESLRW
LTVKGRVDEAQRVVEWIARWNKQEVPKDSLDVIKAVADAVGNTDKTIKHTYIHIYKGWHL
CKSSVILQFLWFTLSLCGYGFSFGVSSFGTNVNLNIFLLQVLVFWTAIVFMILASACGFG
SMAVNLTSVSSWKWKATAEIMLNLFSRGMLTAAWGTIVIVTNETYPTVIRGLGFGASNVS
ARVGAIVSPFLLNFEEGPTLALAIVGGSLLLAALAVCFLHETSGKALAESILAAGKTTDK
QLETATLQNSTFSTENAAETNNVLGDSGVHFKTDSTRM
>Cuni_T012146-R1  Name:"Protein of unknown function" Cuni1044:117778-118488(-)
MSTLTEHNKHLSSLTEHDTHMSTLTEHDTHMSTLTEHDTHMSTLTEHDTHMSTLTEHDTH
MSTLTEHDTHMSALIEHDTHMSTLTEHDTHMSTLTEHDTHMSTLTEHDTHMSTLTEHDTH
MSTLTEHDTHMSTLTEHDTHMSALTEHDTHMSTLTEHDTHMSTLTEHDTHMSTLTEHDTH
MSTLTEHDTHMSALIEHDTHMSTLTEHDTHMYTLIEHDTDMYTLTEHDTHMSTDRT
>Cuni_T006098-R1  Name:"Similar to RRAD GTP-binding protein RAD (Homo sapiens)" Cuni1045:214784-266603(+)
MAVHLISPRTKKRSSSLKKPHRRLLENTELEDMRPRTTSLPTRNEINRPGRKYLTPISDQ
EYSVHPLRSFITTPKGLINRGDSMRSRSNSSVVSSCSGSTSELAPQSRSRTSSSVSNGSI
CIQSPVMPGSPLHGPPPLCGGEPHYRVTVLGCGGVGRRSLTQQFTTSQYLGGLDSPFSEG
CDRELHVSVLLDGSETALEFIVPQENLDLHSVPTSDAIVLVFTIDDRSTFERTTDLLYEL
RKIDGWAGPVILVANKCDLVRTREVSTEEAKSVATTYDCKYIETSVVLNHNVDELLAGIV
SQIRLADTTPKRGPEPGCYSRSKNLLHKIFRKDHLSKSCENLYVL
>Cuni_T006096-R1  Name:"Similar to Gpt2 Alanine aminotransferase 2 (Mus musculus)" Cuni1045:102196-108695(+)
CGFRGGYVELINIDPAVKAMFTKAISAKLCSAVTGQAAMDVVVNPPKPGEPSFELFKHQK
DTVLGQLAEKGRMTTDMFNSIKGISCNPVQGAMYAFPRIDIPKKAIAEAKSKGLAPDAFY
CYSLLEETGICVVPGSGFGQKEGTWHFRTTILPPVEKIGEMLNRFGDFHIKFLNKYS
>Cuni_T006101-R1  Name:"Similar to ARPC3 Actin-related protein 2/3 complex subunit 3 (Homo sapiens)" Cuni1045:336665-349058(+)
MPAYHSQFLNPPKLIGNMALLPVRTQYKGPAPKDTSDFDIVDEAIYFFKANIFFRNYEIK
SEADRTLIYITLYISECLKKLQRCSSKSQGDKEMYTLGISNFPIPGEPGFPLNAMYSKPA
NKAEDDTMRQYLQQLRQETGVRLLDKVFDQNDKPNKWWLCFAKRRFMDKSLSAPGF
>Cuni_T006097-R1  Name:"Similar to slc6a9 Sodium- and chloride-dependent glycine transporter 1 (Xenopus laevis)" Cuni1045:121044-150747(+)
MEKNGKITNGHEETTLFILPDSDTHKALEAEQAVISDTWDKEEEEREHWTRGLDFVLSLI
GYAVGVSNLWRFPYLTLRNGGGAFLIPFFFFLLLCGIPLFYLEVCLGQFSGTSSLFVWKM
CPLVKGIGYGMVLVSGMACIYYNAVLSWVIYYLVNSFRADLPWASCGHWWNTPQCVTHQG
ELNSMFASNVSDGNMTLNLQLTNGSGNFASGSSSCVGNASLCGSSQVKYRTAAEEFWQYN
VLRKSDGLENLGSMQMHIALSLLAAWILVCLCLIKGVKSVGKVVYFTALMPYVLLTVFLI
RGSMLPGAIDGIIFYVKPDFEKLMNFTVWIEACVQVFYSLGPAWGGLITMASFNKFHNQC
FRDVLIASLADGLTSVYGGFVIFCVLGFLAKEANVSVTEVATQGPGLALVAYPEAISKLP
IPQLWAVLFFFMLLLLGIDSQFGMFETVVAGLIDAFPHQLRRRRICLTFGLAFLSYCVSL
PIATNGGIYVFTLLDWFVAAFCVMITSFLECFVICWIYGVDRFSDDIEMMLGRKPGLFVR
ICWTVFTPLIMLTAFIFTCAMYTLPVYDGYVFPMWANLLGFIISVIPLIPIPVGALIVLL
KQKGTFIQRLQSSLQPAENWEPAAKQYKELYGEKSKAYNQRRHWLVAWYRRHRL
>Cuni_T006094-R1  Name:"Similar to TRAPPC8 Trafficking protein particle complex subunit 8 (Homo sapiens)" Cuni1045:22132-82510(-)
MSQCKQSASEFIQSTFCPHIAILCSADAQLLCQKNNLSFVQLIQPFCRLSSEVHIRDPNN
VTHSIHNLRISSCDMAAQPPQQNIIKKQLSDAVASTFGHSQELGASNVITVGSYDLQLSP
STPWFESWREAFLQVLPPSDHEYLNHCLACIFVVASNNGDPLSTFTSLANQQVSQQQQFP
NRLPRWFTQGILHYYVLLHDVVDGEQTRAEAVYQSMKATFGVQICHLLQINSRSLNTLES
VKAGIPVQPDPWSQFLAKQSHTLDTFETDHPAVMDDISGFPTNFSESNPEPVLHSVMSNS
FYDNEMDESGSSGITSSSSCDQFSHPLASPTTPPSRNTPSPDSDPTAAASGYPGESRRPS
SGRYRSTDRNQNKPHGMCLTPSDLDRLRIFMHEFVVRALIPWAERQMKHLNEQLISRKGI
HRSFFSATKKWFGTKPSGPVPASQNTTVVYTRDAPELQLRRLADLAFLFQMYDFAYNTYH
TVKKDFNNDQAWLHFAGALEMASLAVFLLGPQSQKQYPHHYMETAISTYLTSCRNPQYAT
RATLTSTEALKKRAMYNEAAMQFLKMTSEDSDLTSALFLEQAAHCFLALKTPMVRKYSFH
MILSGHRFNKAGQRKHSLRCYTQALQVYKGKNWSIAEDHIHFTVGKHALNLKQLESATAA
FKHLLMKESKQSVSQQATYLREYIFVYKQLLNQEERSSSTYGHLPELPLPVVDSNATKVL
LSSSNRKYEGNGRRIPASGMWFDSDADNQERWKSLEEKLVQSSGRPFRVCPQLFTDATDN
RSSPVGFVGEPITIELQVENPLHVMLVLSDISLLWTFVPSIQGPDPQQVISNEVTTVVKN
SLADEIIQTSVIKEVIVQGVQSERIHLTLTPRQPGHLRVVGLAYNLGTSSITQSASLQEG
DKPAVNQPKFSLTTSMMVRGKQKLEPQGPRLNATKEERTEKLYGPDRRLDLLIHEEMPSL
EVVFCDFPENVLCGEVQCIEIEFTNVGKSSLKSLKVISTHPRFFTFGRDSELPKYPYVYQ
MRTSQCTSLSSTLTSTVTGKEEFLKFPDVLHIPLPKGELRPGEKVSIPMWLRGDDIGGIH
EVDFMFYYEPFAHPSNIGYRVLRHRAVLNTVESLSVRTTVTRPAARVGSIRGQELNSCMF
ACELENLSQVQVQRPHVQELQVTQVSCVSPSWTLVSVGARHHSGVRLGSRETLHLVLKGL
KQGQEEEPKDLVFSEVAFDRDQVNSSCSPCSDFFVRSWLRHKSLIEPLGSSDVGGSHSKI
RKIDSTHLDSAILLRLTLVFLWKAYVVQESGQMKIVVGQHHVHVDRLNTVSISYPIPPVV
TSAPPLKFTQEPEPTEAPAPDPAVTTSLVSYSFSHSNQKQHNFAKGLCVVPVGLTVQNHT
DAEVQVMVDSTKSPETLSSGSSCPRPVKWIGLNQATLTLGKGQNAHLTLKAGITLPGTFN
LNTISVFVTFSSDQSQMVLQKHTTPSIITVVNVL
>Cuni_T006105-R1  Name:"Similar to PXMP2 Peroxisomal membrane protein 2 (Bos taurus)" Cuni1045:465776-476959(-)
MESSREKKKKPANNGILHRAVAEYVRLLQDRPIITKAATNAIISGIGNIISQLVAPDPAT
GGRINWRSVLAYSSFGFLVNGPLVHHFYAFLEKAVPKSTPNATLKRVLIDRLLFAPPFLL
LFLYYVSLVEGAGNKGAVRKITDTYWLILKLNWTAWTFVQYININHVPLKYRTVFGNLCS
LIWMMFISIKRRQTSQ
>Cuni_T006103-R1  Name:"Similar to Pisd Phosphatidylserine decarboxylase proenzyme, mitochondrial (Cricetulus griseus)" Cuni1045:372554-413669(+)
QTTAPVKRKLSLSTRFLLITSGAASVGYYIIHSTRRSEVPPKPWEISLYRRMPLKTMSRL
WGRFNQMELPVFLRKPLLGLYIWMFGCDLQEAEIEDLKLYRNLGEFFRRQLKPHVRPIDI
QHQLTSPADGRILYHGQVKHGILEQVKGVTYSLRGFLGPLPSDSPSHGHDASQQTDEDYQ
SSLSLQPGNQLYHCIIYLAPGDYHRFHSPATWTVEHRRHFPGELLSVSPGVARWVQGLFN
FNERAVYTGRWQHGFFSMTAVGATNVGSIKIYCDEDLETNTKRKYPEHTYFDRKFPEPTT
FHKGDMFGEFNLGSTIVLIFEAPSGFKFKAQEGDKVKYGRPLGTTPA
>Cuni_T006102-R1  Name:"Similar to Tmem199 Transmembrane protein 199 (Mus musculus)" Cuni1045:351411-361043(-)
MAEDTKLSVRRPQLQVTGHIREAAEKALHCRSVTDDLKKECQEMLQEENGKTLVSTTVLR
DIYTALRGDGQKIFLHEIIKDAEFMPQTVSPPTRNPQLEARIQKLRIEQENKEYRRMTRN
VNQKVQTTFTFQEEVKAMNRQLIMMINFLITVAAGFAFGYKGIEMMVGKVFAMQMMSGLI
VALIVFFVDLYFLLRYGF
>Cuni_T006095-R1  Name:"Similar to GPT Alanine aminotransferase 1 (Bos taurus)" Cuni1045:82894-96721(+)
MLRSVDRSLMLSTKYLCRTKMVDTTSRRGKVLTIDTMNPHVKNIEYAVRGPIVTRAGEIE
KELNQGAKRNFADVIRANIGDCHATGQEPLTFLRQVIALCVYPKLLKDPNFPDDAKQRAD
RILGSCGGRSLGAYSDSAGLSVVREDAAKYISERDGIPADANNIFLSTGASEAIRNVLKL
LMTSLPGQDRTGVMIPIPQYPLYTATIAEYNAYPIGYYLNEEDNWALNLNELKRAVSEAR
PHCKPRAICIINPGNPTGQVLTRKNIEDVIKFAKDENLFIMADE
>Cuni_T006104-R1  Name:"Protein of unknown function" Cuni1045:429116-450551(-)
MKMVCLNVHFLMAVMFTVILATLNNMVLGENISIDPNDIHGGVTMGVSNAVCDNGKANIQ
IDWDPNSSDEYTCYEGSSENYKVRLHSSHCDKTAQQPLHICYPRAINYTEDLPTSGSHRP
LWPKYGEYLYLPPQRWIHSLEHGAVVFLYHPCAEPSEIEKFKAVARDCLHRYILSPYKKL
PPDMNFALLVWQCRLVMSNVDLPLMVNFIKTRALNGPERVSRDGQYDVGLLRHAGIVSDV
EDSELCPRMRIMAATAEVFKNRSAARRSKYQQSDQMWQRYRQQYRQQMPDVEI
>Cuni_T006099-R1  Name:"Similar to Acot8 Acyl-coenzyme A thioesterase 8 (Rattus norvegicus)" Cuni1045:270770-279642(-)
MASDSTNGDSTAELDSFLSRSFLDLEKIDENLFRSRTLWKHKTARGVYGGQIIGQALVAG
SQGIAEHQHIHSLHSYFLQKGKQDLPILYHVDKNRDGRTYCARSIKAVQSGSVIFTMQAS
FKLQEPFRTIHQLPMPKVPQPDQLETATESLARFHKSDKLSENRYYFGKEWYDSFPATIK
FINPDELLLERTFYPKRLMWVKAKGHISGDAHQNTHKCCLGYLSDAFILATALFPLAPIK
KRSAVFLTSLDHSMWFHAPCRVDQWLLFEYSVEQVGDGRALCHGSIWDMNGTLVTTVAQE
GVLRHQEEPAKL
>Cuni_T006100-R1  Name:"Similar to Dgat1 Diacylglycerol O-acyltransferase 1 (Mus musculus)" Cuni1045:289834-327522(+)
MKHYNQCNKVRLRKRSSSLTNTKSFAGHNKLSSAPVRKLSTSSTDSCDSDGHLCTEELCV
MDSKKRLESNIGLSQAQKPVPKDVLRRTSSSHVLRNESMSNQVDGQHNSGTDQTLGKHCK
SCGGEMLKIASPELPVSSYPFRSWRRMLTSCVPCWLSEPEFMVHPKPRDKIHNHADSLFS
TSSGFTNYHGILNLCFILLVLGNARLFLENIIKYGILINLSFTKWFFHEPYNWPNLLLTL
SIAVYPAIALATEKALAKNVIGNRTGLLIYILNLSVLLFLPAVVIYVFHPIIVFSLITLG
TVTTCFLKLISYAHVNYWCRELYATDRLKRRASCGSMMNGNQDTDGSCMSSKQTYPDNLN
IRDLTYFMCAPTLCYELNFPRSARIRKRFLAKRLLEMVFLCWLLVALTQQWIVPAVNNAR
QPLAEMEAFKMLERLLKLSIPNHLMWLVFFYWFFHSSLNVIAELLRFADREFYKDWWNAE
TVSEFWQNWNVPVHRFATRHVYKPLLRRGVPKLAAATVVFLFSAFFHEVSHICV
>Cuni_T019229-R1  Name:"Protein of unknown function" Cuni1046:131598-132404(+)
MAKFCESTKKLKLTQESSPDKTPSPQYLSVDETKRPRANSDPVGLHLHINPVPEITVTGE
DCRDGGRTEDDEEDSFLIPPFPRRRANTCPEDMFRVSRGRPPTPPPTDLRILRNSAGKRF
SFNFSPKDISSISFAHHKLSKVSEEKQEQQPKLHSEQECVPLVSTPSTSCSCSSEISGKN
PEPADPVSCRLHSSVNYSEAHAEHSSDQRVITQMSGLSVAESVADTTNKKKTFTETTLNA
DVLTNSQDSWKSKDNSRDSSDSQRLKAY
>Cuni_T019231-R1  Name:"Similar to rut Ca(2+)/calmodulin-responsive adenylate cyclase (Drosophila melanogaster)" Cuni1046:309222-328590(-)
CTTFDVRKSPKLRVFIAITAVLLPYLMVQINILSCSGGHGMSFLESLSLMNIDEHLTCSD
PNYIIISGILCFFILALFIKINPLLKIIFMFVISMGHVLVMELTHKSLFAKFDSTVHSFI
PTDVYGILAFVMFLLGFSLQNREQEWTLRLDYLWKSQAAEEKAGMQELQRQNSRILCNLL
PEHVANHFLNLQSTNHMELYSQQYNKVAVFFASIPNFSDFYVELAANNQGVECLRVLNEI
IADFDELLDMPYFYGVEKIKTIGSCYMAATGLKPTHLVKGWEDSVAFYLTMVVDFVMAMK
EKLRNINENSYNNFELRVGINVGPVVAGVIGARKPQYDIWGNTVNVASRMESTGVPGKIQ
VTEEVYSILKNVFTFECRGKVQVKGKGDMITYFLKDRIAPRDPNCILPPDTPPNSPHASG
TPDCRFVKMLLITVCNSRYLRSVFFNPWTAEKV
>Cuni_T019230-R1  Name:"Similar to NR2E3 Photoreceptor-specific nuclear receptor (Bos taurus)" Cuni1046:263619-279720(+)
ITHSRSLLHQQTRPLPHMCRVFSHVSYCVVTVLLPYSPMLFSSLGLLCVVCDDTSSGKHY
GILACNGCSGFFKRSVRRKLIYRCQAGTGMCNVDKAHRNQCQACRLKKCIQMGMNKDAVQ
NERQPRNTAQVREDQIEHELEHPLVPCNATISATHPAFSPGTGHRFIAGLMPIDRTPIKD
DSADS
>Cuni_T019228-R1  Name:"Similar to cyp27c1 Cytochrome P450 27C1 (Danio rerio)" Cuni1046:14145-15749(+)
MIRLKTTTASLRDNQEINYRKQIPDTDMSPGNEYASSVRPLPFSSMPGPRGLRKLPYIGT
ALLFKPFSRFTPETFGEMVSYMHDKYGCIFKSRLGKDYSVYTDNLRDIETIFRTEDTYPL
RRLMTLSRVFRERNGLPHALGTVSGPEWYELRSPLNPLLNRPQVCLHYLPAQNQVADDFV
SRLQTNVFSPEQLSEEFFKFAAESIGIVCYNRRLGFLEPVLSAERVQLLESFKIALHCTF
IAMMGLERRYLKTADDAFYRQYEDAMKFIRNQSMLYVEKVKEELKVRPFGNDKNDTNAGN
KARVESNLLASMIVNSQLDIEKILAIIDSMLIAGTDSTARNLAILFYNLAQNPDVQDIAA
KEVTSLIGTQHSVTPATLAKMNYVKSCVKESMRLNFPLSNGTERTLTSDTVLSGYLVPKG
TSVIMSSRRMSLDPANFPHPLQFKPERWMRDGTLGPDETGNSKKGSAFACLPFGHGARGC
IGRRFAELEMYVAAAKVLQKLQIRVDHSYSGLDSIYTPFITPKKPIPFIFTERT
>Cuni_T014311-R1  Name:"Similar to PRPF3 U4/U6 small nuclear ribonucleoprotein Prp3 (Gallus gallus)" Cuni1047:229973-262826(-)
MALTSRELDDLRPQLSDTVKNVIGFSEPTVVNAAVNCISTGFDMKKTIDQLSQILEMNQA
SVLAERVYHLYESYRTSGRISKKRRKEYEDDTARKKRAAEEEIAISEMTSMHSAPPKPKN
TLPNLIPPGSQLSPDKIKEMMANAQKMIQERKAQLQSVMPVASMPPPRIGMAAPSGPTDA
AMNKAKRAAELHAQIQARLSGGPNAGLPPPLIPGLQGSTTVQPMQQPMAGPSPLILNEEG
KTIDAKTGEAIQLSVYTPTLKANIRAKRREQFKGFSERPPEEISESKFFDPRLSLKTVQR
PKRGFKFHEKGKFEQQATRLRAKAQLERLQAEISQAAKKTGIASAAKIATIAPKKEIKEG
EVPDIEWWDSYILRRDAYDIEDGKIDHHILEGITNLVEHPTQIAPPDTAIPVFLTKKERK
KLRRQNRREAEKEIQEKIRLGLAPPLEPKVRMANLMRVLGTEAVQDPTKVEAHVRAQMAK
RQRQHEEANAARKLTVEQRRDKKIAKIKEDTTMGVNVSIYRIRDFSDPAIKFKVEKNANQ
LYMTGIAILYKDCNVVIVEGGPKQQRKFQRLMLNRIKWAESQKRAKDKEEKDDDGSVDKT
NRCSLVWEGMVKTRSFDEIKFKMCPTESFAREQLKKHGVEHYWDLAYSASVLELAGEDN
>Cuni_T014309-R1  Name:"Protein of unknown function" Cuni1047:106263-151938(+)
MATELRSIATSRGRKSSGVVSSPPRPNRIPLVLSHWDSFYKTCVIDGPVSVQESDVTMMN
NASDRSAYRQASTTANHIGSSGESSAVSHSKVRDEAKHDNSPTHTTIEFQNATSKNDIDS
RSKNLTIDQVKERVAFAVTELKNLEEYHHGDGMKYQKAIGDLYWDYTNERTEIGDYLADL
GYAEITINMLKQMNSLGIFKNDDIWFPTYYTYNTCWNYSDASEKLAKCLAETGAVKLMTL
NLGHKPYLENMHSKNVYYVLKASLSTLHNIARCTGVKHHFKEIKTTEVIMPLINSNDEFL
KSIAMLTLAYIVEEEENAKLIDETNTIKNIVHWIHKALENKQKRRFRGFTPAELTQGLAK
LAVNDSNKAKIVEEGALADFCQMLLHTDPKEQANSAECLWTLSFDKNVRQMINDFPELLA
ALDSLKDSENPVVQKNVRGAQWLLRGEHEASATSTRSPSAHSSKNHIFISYSWTEKELVK
KLSASLTAEGYKLWVDWEQMGGASLQATAEAIENAAVVLICMSEKYKQCPNCRTEAEYTF
HLRKDYIPLMVQPRYRPDGWLGAILGAKLFFDFSGKYPYEKPLQGLLKELRGRGKSAHPA
GQNHSPVVDDIHAAHPAANNASVIGSSPSTPFSNGNNASAVVSMSNENVESWLVSKGLQR
LTTAFSQIDGQLIWQLKRMREMAPEYFHNSLERQFGMTLIDILRFNAALDSLQ
>Cuni_T014312-R1  Name:"Similar to Serpine2 Glia-derived nexin (Mus musculus)" Cuni1047:361706-370663(+)
ASVAVPYICRRDLDVQLPKFELDTEETMRDMLQSIGITQVFDPSKASFKKMTKDRSVSVS
EVRIRNVLHRAVIEVDEEGTVAAAATSIGVAMSLPPRVIANRPFMFVLRDKVYGINLFIG
RFTNPGGENLKN
>Cuni_T014313-R1  Name:"Protein of unknown function" Cuni1047:384368-387227(-)
SHVAGTVVALTLILAAIAAALVFGYLHLKRKRKLSAISSCWKPIIRSKKSSISGSRRALA
ELDEMETTVRPKQAADNTDDMFTIEDFDDNADLQAGRQEYFYDEVFGQSQFEDETTNNAM
RNLYNDQTTQEEMLNIDLESQGTQLNNFIQTSDNKNVD
>Cuni_T014310-R1  Name:"Similar to LSM7 U6 snRNA-associated Sm-like protein LSm7 (Homo sapiens)" Cuni1047:164014-175205(-)
MSQQISQGGDRRTDADKEKKKKESILDLKKYLDKPIRVKFSGGREASGILKGFDQLLNLV
LDGTTEYLRDPDDPFKLTEDTRALGLVVCRGTSVVLICPSDGMEAIANPFIQQD
>Cuni_T011823-R1  Name:"Similar to Universal stress protein in QAH/OAS sulfhydrylase 3'region (Thermus aquaticus)" Cuni1048:201540-209176(+)
MAEQRNVIVAMDGSDHSNYALDWYCNNVHREGDHVVLVYVPELNDLLHSSQMEQLEEQER
IKQDLEAFAEILRHHGLGGKVKSIMASKPGEGILKAAEDEHGCMIFVGNRGKGLLRRTFM
GSVSDYVVHHSHIPVFVCKHPNKHIPHHD
>Cuni_T011824-R1  Name:"Similar to CYP3A24 Cytochrome P450 3A24 (Ovis aries)" Cuni1048:229490-231001(+)
MNVDDATTLSHKRISSIVFFRYANQPFGTWKKLGVKGPSPYPFVGNIPEMFDDRIGTCVS
IAKWQKQYGRIFGAYFFRVPVLIVTDPDFLKHIFVKDFNNFTDRFFAGNRKLQQRIIRKG
LFFEVGADWQRIRRIMSPTFSSGKLRLLTHYMNLTAQRLGENLKNFAASGTHVEAKKVYG
AFTLDVICGTAFGLDTNSQQNLEAPFIQHAKSMLTFEKHIQIILGLAGSFPELASLFEFL
DIGIFKKNDVKFFEKNLVALIQERKAHPERQKCTDFLQLLLEAEADKTHEFVGEKKLTAE
EIAAQGIIFIMAGYETTSTTLQYMSYELAKNTDVQAKVKNEISKVLGDTTEPDYDKCKSL
KYTEAAISETLRMYPPAHLLSRLAEREISFKDVKIPAHTGMIIPLYNIGRDPEFFEDPDS
FKPDRFLNENKAKINPITYLPFGFGPRKCIAMRLAIMELKIAIVHILRAVEFVGVTPEVL
DIEDFTGILVPRSPIKLHVRAVN
>Cuni_T011820-R1  Name:"Similar to RPS23 40S ribosomal protein S23 (Lumbricus rubellus)" Cuni1048:134577-137897(+)
KPMGLHTARKLKDHRREQRWHDKDYKKAHLGTRWKANPFQGSSHAKGIVLEKVGVEAKQP
NSAIRKCVRVQLIKNGKKITAFVPNDGCLNFIEENDEVLVAGFGRKGHAVGDIPGVRFKI
VKVANVSLLALFKGKKERPRS
>Cuni_T011821-R1  Name:"Similar to C3orf84 Uncharacterized protein C3orf84 (Homo sapiens)" Cuni1048:143466-149265(+)
MSVKVNKGPSSHCHYYTVGSWFPTGYYGHYRSRARVDFVNEYRQLAKPQPPQRFIQRSLQ
PADYHLFSIHDNRNSFQCDASYFSQGLGRKRHPDRSGIFDPNILSWPPYRENPKLDRPLT
STYRKDFKKDEPNVQLLVKRPLTSFDTVTTTYRSVHGKDSPNHNLINALNNEALLITTRS
RLYQARKKKSGERETVASCLTWFRAPVPPATSQAKPPPPLPTCQANHPATCLTDCSGETQ
STQEGSVTIDNICMSQEMLPTQMSMTLDLPRQESQTLTPLAE
>Cuni_T011825-R1  Name:"Similar to CYP3A24 Cytochrome P450 3A24 (Ovis aries)" Cuni1048:232661-241853(+)
MNLGIVDVPVWAILLVVLAILLYWYAYQPFGTWKKLGVKGPSPYPFVGNIPEMFDDRIGT
CVSIAKWQKQYGRIFGAYFFRVPVLIVTDPDFLKHIFVKDFNNFTDRFFISNGKLQQRII
RKGLFFEVGADWKRIRRIMSPTFSSGKLRLLTHYMNLTAQRLGENLKNFAASGTHVEAKK
VYGAFTLDVICGTAFGLDTNSQQNLEAPFIQHAKSMLTFEKSLQITLGLAGSFPVLASLF
EFLGIGFFKKNDVKFFEKNLVALIQERKAHPERQKCTDFLQLLLEAESDDADEFVGEKKL
TAEEIAAQGIIFIIAGYETTSTTLQYISYELAKNPDVQARIRNEISKVLGDSTEPDYDKC
NSLKYTEAAISETLRMYPPVHLLSRLAERDISFKGVQIPAHTGITVPLFNIGRDPEFFED
PDSFKPERFLNENKANINSITYLPFGFGPRACIGMRLAIMELKIAPCTYWELWNLWASRP
RCWT
>Cuni_T011827-R1  Name:"Similar to CDK17 Cyclin-dependent kinase 17 (Homo sapiens)" Cuni1048:298523-330089(-)
EVTKRLSLPADIRLPENFLARQTLSLSPDGQLTRRSRRKSLSEIGFGKMESYTKLDKLGE
GTYATVFKGKSRLTDSLVALKEIRLEHEEGAPCTAIREVSLLRDLKHANIVTLHDIIHTD
KSLTLVFEYLEKDLKQYMDDCGNIMSMTNVKLFLFQLLRGLAYCHKRRVLHRDLKPQNLL
INERGELKLADFGLARAKSIPTKTYSNEVVTLWYRPPDVLLGSTEYSTPIDMWGVGCIFY
EMACGRPLFPGSTVDDELHLIFKTLGLPTEETMPGVSKNQDFVNYQFPPFQTDSLITIAP
RLDSDGLDLLAKYLKYNPLIRISASDAMKHSFFDCLGPAVHKLPDTVSVYTVSGLSLHRD
PGIRSSSLATIGKHRRQSMLF
>Cuni_T011826-R1  Name:"Similar to At3g01520 Universal stress protein A-like protein (Arabidopsis thaliana)" Cuni1048:270703-273171(+)
VYTLNRDTMMAASEEEERKIKCLLERFAEKLQQLGLEGRVRNIMANKPEEGILRAIEEED
PELLVMGCRGKSTLRRTFVGSVSDYLVHHAPCPVVVCKRPQKSK
>Cuni_T011818-R1  Name:"Similar to ZNF226 Zinc finger protein 226 (Homo sapiens)" Cuni1048:61448-83219(-)
MDEVSCSDRLHRYSLTIDDVIANFVYIPEPLEEFSLTQEEETAIRNQFESVRNISNKCGT
DNNMNYNQCAKVVCSKTSASQLCLPPGSDEPLVASHSVDAIRPPKERPTLLMPERTAESH
PEFQQTVDHIDSVLAFVAADCSSSLLPEQVSCINGSKKQKKPKKKPSGDVSQEDSKQKKM
EEDSSSSTTAGKNTGGGNELNCSVNEDAQLNNGVVGISSEHCQTEDAGEISKPKKVKKRK
SENTGKTQNAHKLSDMCSETGEDVIVKKATVHEKVKSSKKKRTDVLTAGCVTDEPMRTVD
TVAEDTVNTPSKKVINRKHPTPKKNVTEQIVVFHADSAVDKAGVCQNRAETSDIGESIAS
TSGSSEQNTPVHEPESKDEISSSDLQMTDKENHDTGLESGGDDSVRRYKRRLDFVKCDQC
SHQARGRSALSRHMKKVHMLDVMMPFRCERCNYGSTKMASLNRHLFTHGVFPCSRCSFVA
TERVKLTEHTAEQHKDKLDVRMCKVCNRYIKCDKTTIEEHTQECQGPKPYQCTECEKEFK
YASSLRVHYHTHFPDQPKRFKCELCDYRTNYKANLHKHNKNMHASRDHDVQCPDCGKLFS
TEDNMKRHRKVHTLNRPFSCGTCEKKFKTSGALKGHQLIHTATRPYPCNIPGCSRTFRTP
KFLKSHQEEFHHLIPKKFFCSVEGCNYSFFKRSHLKRHTITHTGERNFHCTWPGCSKSFR
HSDNLKVHFRAHTNEKPFQCHLCDFKCKQKNSLFWHKKRVHQLVDFSISQRHMEVKLRPG
VEHDLKKVEAASDVAGAEVVQAVLSASENAAEMFVSETAASGVGRMSEEGVCDRAIKDPS
LGCAAEMKQEMADLPVPVKKNIQTVVVTQEEQGSLDLYEFKSDEDSEDETPGSFRRDKTA
MNGLTPLPPPPKELLRKNEILEMKEKEKEEKAEKKEQERIEKAGKKEQEKNKRAEKKNQE
KKVKAEQREIERQEKLKKMEQERKEKIAKKELEKKEKEEKKELERKEKLEKREIDKKEQI
EKNELKKKEKIEKKQQELKEKIEKREQEQREKAEKREHEKMEKKLTSAVCTTKRNNEKSD
NDEEKKTENGKKSCFSYLTRRKSPVPAGRSEPVTTTRKLNSGRKKLFRDAVAKSIQEKSV
RVRTEKKTHASSFKKKMLSSKKGEAKKSPFALRSLPGARSVARKMKRVALKRNHIRRCKK
KEKLSPPTRKPSARIKANSVKTTTVSKPVLREQTASSSGLHTRKSARKKTALMNAEVDEA
ELKAPDNAEMTASADDQNVSKSEETQAIRAISDENEVGLNSHPVENLTPAVRSSSPASSE
EVMIQGKASPYRDFSDSENQEDHTAPASSPAQKQPEYIDAHIPSVAESDSSASEESDSET
VDKDMGQTAEEFSDDEVSNDIPLTPPRAPAPPPMESSDDELELEPELTPFSVPGPSTPFS
VPGPNTPFSIPPPTNLMQQQSVHSEDAPMSVLQSVPPVDVHSQGSVDMQQSLESAEMHPH
ETVEIMNSHGSVDMHHPPGSADSHNSMTVRSHKSVEVHSHGSVEMIHSHGSVEMLCHGSI
TESVPHLDQHVRTPESVIRDMGSNPDPAKYELPHSLQEQTQTDADKEYFDQYLRNLSAAN
NRAAIGLEPSPNGLQHLEAMVCKSHMDSKEMSAKSPISCLPTSVITSLESLPLLTNGDLR
ARMDSLVLDRHHESFYTRDTPSSLSRLSDHQTPLPSSAMRHSPAFDAFSSLNSLAAATGG
RENSYLRQPENLFSTPPVTSTFIAEAMFQRQAMATPFLPPQPSERSGLSRIPDAAPLRSS
SSSSFLRRPGTVPSSDMFSSPTMAQNMPRHPFANAWTSQEVSPAHWQSPYLAHQSNMATT
GSFFPSKDNYLTGRDFMFDPSVRPSSERSMFSSISSSQSQDSYQFDRFDLSNYFPNAMTP
YGSSTASLEYSRTAHAGTAKPFDERYRQTAASTAISDYRGLPPTGGSSDMFPGFPGVNSG
FSLYAGNAMSYHTPHMTENVNSAFLTHSTSAQHAMFERNYAAAAHRSFYPQNTPYPFVDE
RQYHSTSKLGHGHPVAPTPVPQERDLISRSAAPESQMQDPYRSLLYRY
>Cuni_T011822-R1  Name:"Similar to SRPK1 SRSF protein kinase 1 (Pongo abelii)" Cuni1048:157703-189786(+)
MSSKIPRKALAIQGRKKRSKAKPRFKQDDKKRISNDSKRKDESPCDEEDEEEEILGSDDD
EQEDPRDYCKGGYHPVKIGDLLNNRYHIVRKLGWGHFSTVWLSWDLACKRFVALKVVKSA
QHYTETALDEIKLLKCVREADENDPHREKAVQLLDDFKISGINGTHVCMVFEVLGNNLLK
LIIRSNYQGIPLHNVKLIIKQVLEGLDYLHTKCKIIHTDIKPENILMCVDEAHIRKLAAD
AIEFQRLGLRLPGSAVSTAPKEKPQDLSKMSKNKKKKMKKKQKKQEQLIQIQMKQLEELD
REKGGEKEGSSSSGLLNSESFNSLQNMDADSNDGADDDRTLMAGSDKGGGDHSLKVLSGQ
DSLTDAGGPRISVKTLLQTNGKSSVQPVDTKKNEGKVCEPNQCNVSCNKVDDIIMDENGD
EPAQLNTSSSSESQAAAIARLNVTDDNILNSSHSPALVANSDSLASSSNCSTSNNNCPES
SNMNNVATVNAVPSLPTTVPLCNGHAAQFSRGSAGIEAESSVPGCDREQGVSGRGKDAAE
APVNVCCMSNAVSGAGESLVHDIELSELGSSSHLNSNSLKSFEGDMEDIQMEAASDKNHT
PVSHKPDPIHEICDVFPVKIADLGNACWTYHKFTDDIQTRQYRCLEVLLGAGYDTPADIW
STACMAFELATGDYLFEPHSGEDYTRDEDHLAHIIELIGPIPRHIALSGKYSREFFNRRG
ELRHISKLKPWSLVDVLTEKYEWSEKDAQEFCDFLVPMLVFDPSERATASECLKHPWLQG
V
>Cuni_T011819-R1  Name:"Similar to TAZ Tafazzin (Macaca mulatta)" Cuni1048:106105-121922(-)
MPLKDGSWRIASPGQKVPWLWKFSSRFAVRTVGLCSKLWLEWLNTVKVHNKEVLHNLVEN
RPNDRGLLTVSNHSSCVDDPLVWGTLKTRHLLNFDLMRWSSAAEDICFIKPWHAVFFSLG
KVFPLVRGDGVYQKGMDFSVEQLDLGKWVHFFPEGKVNVTQEFLRLKWGVGRVIADCKKT
PLVLPMWHVGMDQILPNCKPYIPQIRKHVTVLIGKPLDLTTDVEKLKSSNKSAQEIRKCL
TDKIQEEMQTMKTVAESLHQEWKSS
>Cuni_T017102-R1  Name:"Protein of unknown function" Cuni1049:154011-159508(-)
MKTVCCVLSLGLLCAQALTTVLPLVCVLAAERGDLPDEVCDLPEKAVDLPKKAGDSPEKA
VDLPAKAGDLPEKAVDLPEKAFDLPEKAVDLPARAGDLPEKAGDLPAKASDLPEKVVDLP
AKAGDLPEKAGDLPEKAGDLPAKAGDLPAIVGELPAGTGKR
>Cuni_T017099-R1  Name:"Similar to scrib Protein lap4 (Drosophila melanogaster)" Cuni1049:31223-32365(-)
MESLYFSNADFFRIPDAFLHLNALRHLNIIATPVNDWNIGALAYIGKTLQTLNIEEVEFT
TWPPWLRCFENLNELSIQSNAISSIPDNGFDHLADNLQVLTLSNNSLTDTPKALVILKNV
ESLDLGLNKISNVTWLPHNSKLFSLALNLNSISDAKQLSNVLRPFASTLDTVLLSHNRLT
VIPDLSFLTRIDTFDLSYNLISDPASGALHNETTMLDLSFNQLPSIPVIYRGLKLVSSMT
LTHNLIHVVQGSSIPVWIAYLYLEFNLITELSDTSFPDNSSLQVLLLDGNPLVKISNLAL
KNLKFIYSLSLKNTKLTRLPLSLSYLTSIFDLDLSNNTGLVCTCLEKSLRDKITSNIAII
GDCGNIRIYDFFAILSSSCP
>Cuni_T017107-R1  Name:"Protein of unknown function" Cuni1049:324275-325574(+)
MKRYLPLAALLACVRISASGARCPYKECVCDSISIVCQNRNLTRIPALISEKADEAFLLM
D
>Cuni_T017106-R1  Name:"Similar to G2 Boophilin-G2 (Rhipicephalus microplus)" Cuni1049:294585-315466(+)
TGMCLAYFPRYFYNSTSKECEFFVFGGCGGNENRFDNITACQTECQVGYTSGPCLAYFPR
YFYNSISGECEQFIYGGCGGNKNRFETTTACQIACQGGYKA
>Cuni_T017098-R1  Name:"Similar to Sur-8 Leucine-rich repeat protein soc-2 homolog (Culex quinquefasciatus)" Cuni1049:7811-13183(+)
MDSEIIRLTGLILFYFCTALLAADDCTYQACFCEGTQIICQDRGLSAIPPIVGTGPDNPE
LMFDTNNIMAIQAGSLPKHLKRFTAFDNPLTTIDSSAFVDSESTLEVLQLSNFRFTRFPD
AFMNLTHLKYITMYDANILDWNAKVMKNIGPGVLSLDLQNMGIVAWPDWIQFFRSLITLS
LDDGGIDSLPDNALDMLANSLTTLSMNNNSLTAIPKAVSRLKALQILTLYHNKIIDIAWL
PHSSNITSLGLSYNRLFNATQLSLSLRPLAGSLNQINLVGNRFTEIPDLSFLKHVSGLDF
SYNQLSDSQAGPLPSNIFNLNLEYNYLRRIPGVFSKLPTVMELMMTTNVVTEIQASDFSP
WIATVDLSFNKIMELTDTSFPQNSTITTLNLNNNPIATISQNVFNNLLRLGELNMKNTKI
ARLPVALSVLTNVNFFEVDGSPYLVCTCMEKSLAQWILSRPNMPDGYCGLSTIRNFYFTL
SQYCP
>Cuni_T017101-R1  Name:"Similar to LRRC15 Leucine-rich repeat-containing protein 15 (Homo sapiens)" Cuni1049:102697-111149(+)
MVRQKYDLIIWIRVCAFTCSFAAGCPYQECSCDGYEISCQDLGLPAIPRLTGASSGFDSL
LLGSNHITTIPAGSLPSGLLSLSLLDNPIATIDENAFNGSATTLRSLSISRANFSRIPDA
FGHLQNLKYFDFYDTNIVNWNDDVMKKLGQTMINLDLEKVGLKMWPHWLNNYSSLNDLTV
DFNQISSLPDDALNKMIFNLTGLSISNASLTSVPRAISKLVNLESLHLYANKISNLTWLP
PPKKLTTLSLNNNLISDAKHLSDMLRPFNETLASLEIDRNMLTAIPDFSFLNQVSSLDFS
FNRISDPTSGALSNELYDFDLSNNCLPSIPTVWRSLVSSTSMYLSHNLISHIEQADFHEF
LMEINLSFNMLTELTDSSFPAHTKLFALYLNNNPIATISNHAFDGLDSLNTLNLQHTRLT
RMPLALTSVLTLYTLDMSDSSDLVCTCAEKSLETWIMTVKQVNGQCGETDINEFFATLSP
MCPP
>Cuni_T017105-R1  Name:"Similar to ARPC3 Actin-related protein 2/3 complex subunit 3 (Homo sapiens)" Cuni1049:286391-288157(+)
MPMIIHYLKCRPITPFLNPPKLIGNMALLPVRTQYKGPALKDTSEFDIVDEAIYFFKANI
FFFATMKSRRCSSRSQGDKMYTLGISNFPIPGEPGFPLNAMYSKTANKAEDDTMRQYLQQ
LRQETGVRLLDKFFDQNDKPNKWWLCFAKRRFMDKSLSAPGF
>Cuni_T017104-R1  Name:"Similar to Isoinhibitor K (Helix pomatia)" Cuni1049:278649-278833(-)
SVCDLPPETGRCRAAITKYFYNSTSGYCEEFIYGGCEGNENRFDNITACKDQCPIQRIFV

>Cuni_T017103-R1  Name:"Protein of unknown function" Cuni1049:193842-218097(+)
CVACQLKREIVGVTPFSTFTTQHLEHVNSSFMDYVVATPTDFPISLLVNLHAKEGTWWVT
PFSTFTTQHLEHVKRSFMDCVMATTTDFPISLPVKLHAREGT
>Cuni_T017100-R1  Name:"Protein of unknown function" Cuni1049:91382-91910(-)
SVCSLIAFHTSITWDKIDHIPKTKLNTTFNFPLQSNHITTIPAGSLPSSLVSLSLLDNPI
ATIDDNTFNGSATTLRSLSISRANFSRIPDAFGHLKNLKYFDFYDTNIVDWNDDVMKKLG
QTMINLDLENVGLKMWPHWLTNYSKLNDLTVDFHQISSLPDDALNKMIFNLSGLSI
>Cuni_T009684-R1  Name:"Protein of unknown function" Cuni105:102973-106336(+)
DDLTVFVGDLEAKALQIVAEIVKAVGGVAIDKKRETQDDWVSIVADGTVAIQDAVKMFDD
VKSLISVVGGK
>Cuni_T009693-R1  Name:"Protein of unknown function" Cuni105:678833-681189(-)
LNQETIHVRTTLTPSIHIRLKETSTIYRCFIVEILSSTMKLQVPDRSGKINIPSTPSDDN
EDYGNDGKDSNPEEDDDNED
>Cuni_T009690-R1  Name:"Similar to FucTC Alpha-(1,3)-fucosyltransferase C (Drosophila melanogaster)" Cuni105:461324-469715(+)
PYGPWRSAFNWTFNYRTDSDIFAPNNRLAWRNRTDLLPDSVYLEIAKNKTRSVAWFVSHC
ATQSKREIYVKEMKKYIDVDIYGNCGMRSCKRAEESQCETKLTLTYKFYLSFENSLCKDY
ITEKFFRNIKYRSHIIPVVRGGFDYSKYIPIGAFINTANFSSAKDLSLYLKELGQDHVRY
ARMLKEKDKLTTLNYKFDWCDICEKVHTDNRAKVIPDIKEWSHKDACYAPTDISKSR
>Cuni_T009694-R1  Name:"Similar to RPL26 60S ribosomal protein L26 (Littorina littorea)" Cuni105:706004-706791(-)
MKFNKAASRSRRKNRRKIMSSPLSEKLRQKYNVRSMPIRKDDKVAVVCGHDKGQKTGKTQ
VYRKKFVVYIERIQREKANGATVSVGIHPSKDRKKILERKAMNRAKALTDKGKYTEETME
S
>Cuni_T009688-R1  Name:"Protein of unknown function" Cuni105:419601-419921(+)
MFVHKTVSNSNKMSTENKRRKRKRLTTLRTSSYIHHEYANTSATHPSPVLTSHLPRIWQF
VARHVFKTTIIATSIAFSVLHKDVTSFLLSVTAFAIHRLLYSSVPP
>Cuni_T009687-R1  Name:"Similar to NKAPD1 Uncharacterized protein NKAPD1 (Homo sapiens)" Cuni105:404275-411841(-)
MSQSSDSTSAGTASTASLPIGRQKTVGLHQGAKSLIRNVIRHTDTHNRLLEESEMWQTYY
RLKREKPDESDNKGNAFRDPDVKNSFLYDDRKDMRWERSYRRGLKQAHMDEIAENRQTDI
GSSNSTFWMRQLQKVEDNDPERWGHAGFKELYPDAFDSDRSAKNDDAQKKKSLKKTHTRR
EHKHRSSDRKRRRKRPESDRVRKKEKRPRKHKDDSSRDKKNKKRRYSHDSDTDSSTDVAE
KDRKSKKRRNSTETSESDSETEEESKRKKSRRNMKTESEREKKKSRESAAHRSHRQRKRR
KH
>Cuni_T009683-R1  Name:"Similar to GSK3B Glycogen synthase kinase-3 beta (Spermophilus citellus)" Cuni105:32428-59935(+)
MSGRPRTTSFAEGKDGNKVTTVLATAGQGSDRPQEVSYTDAKVIGNGSFGVVYQAKLTET
GELVAIKKVLQDKRFKNRELQIMRKLEHQNIVKLKYFFYSTGEKKDEVFLNLVLEFVPET
VYRVARHYSKSKQTIPILYIKLYMYQLFRSLAYIHSQGVCHRDIKPQNLLLDPETGVLKL
CDFGSAKVLVRGEPNVSYICSRYYRAPELIFGATDYTCQIDVWSAGCVLAELLLGQPIFP
GDSGVDQLVEIIKVLGTPTREQIREMNPNYSEFKFPQIKAHPWSKVFRPRTPQEAVVLVS
RLLEYTPSGRMTPLEACAHAFFDELRDPNTRLPSGRELPLLFNFTPTELSIAPALNATLI
PPHARSAGTDIAVSSGTAANNSSLAPASNSSLDNNSAASGASTSGDTA
>Cuni_T009697-R1  Name:"Similar to SPR Sex peptide receptor (Drosophila melanogaster)" Cuni105:878809-884226(-)
MLDHCEKVCALQCVRQPSPSGVLRVQEITRCLIYLCGITLRMDDSADLIESLDQDVLIGN
YSADSQNNTCLLGRPERLDLDQPPRYSVPLQGYFSPVLVFLTIINNSLVCIVLLKPHMRS
PTNAILVAMALSDMFTGLFPVPVFLYFYATERYYEWVPYNWCFALSVFRVHIPTIFHTAS
IWLTMALAIQRYIYVCHSFKARTWCTIRNVVIGTIAIYAIATISQISCFFELRPVETFRK
SVLDPNKTVSACILEYRPWVRQHINLYYSTYFWSRVIFIHLIPCVSLVVMNALLIYAMKK
AQQRRMQLLRQNKKSESRKLKESNCTTLMLVAVVGLFLLVEFPLGLLMVFVILDKAFGIV
IIHAETVQ
>Cuni_T009686-R1  Name:"Similar to ncam1-a Neural cell adhesion molecule 1-A (Xenopus laevis)" Cuni105:311905-333095(-)
PKMSMTGATLKVAAGVKAYMQCKATGDPAPTITWDKDGTPVHLLSSRYSVNKDNWALRVF
TPQIDDVGNYTCTATNRLGVDKTTYTLLVMVQPESQIVSPSNLTVMELTNQQLVCRSRGV
PRPFFEWLIKNNPPIRADTTTQGNVSLKRLYSIEREVDEHVYESVLYFQPVNYKDFGNFA
CVAYNDIGHSRVRASLDVLFSPKVLSDHSSLQPVVWWEGHPTNLSCVVAGNDVPEITWFR
NRKRFTCNKLEEWEEASQITSSCIVSHPLILDGGPGVYSCRAKNRYGKTPVHEFHVRENF
PPAAVEFSTVSVKPDEVVLAVKIPKKRDTPPATYVLASYKLAGDVGGVPNPEYERMGDVD
KQGEGTVKLVGVRENSEYVVKVRARNSVGFGPETVSVINTALPPAATETTPWMSTISTVM
PIYDNSYDEDVNQLTNRRDDVRQLEFEESPEALGVRSSAYCLRIYGGCWFCPTNFMFFIS
WILLVLRCHCVS
>Cuni_T009689-R1  Name:"Similar to ZDHHC3 Palmitoyltransferase ZDHHC3 (Homo sapiens)" Cuni105:423732-435052(+)
MAVFRLDPCGIICILITYLAVFYADYVVVRHIVLPSMTDSLWGSLCAVVFNTIIFLLIVS
HLKAVLSDPGIVPIPKTSMDFSDIHSDSSKLKTNDGWTVCMKCETYRPPRAHHCRVCRRC
VRRMDHHCPWINNCVGEYNQRFFIQFLFYVGLASVFAITLVVIALLTQPQIRKEYRQNRL
LHCVLLVIESILFGLFVIAIGCDQMSAICHDETAVEYVKKEGIFRPKKSRLVLLQEVFGR
SHPLLWLWPFQDVHVTESQEPLQYV
>Cuni_T009691-R1  Name:"Similar to PLSCR2 Phospholipid scramblase 2 (Bos taurus)" Cuni105:487915-497570(+)
MSFKIYDLTVLCPTGMMMGPPPNIMIPAGLPPGLAYLATLNEVQIHQIMEIAEILIGWER
NNRYDICNNQSQKFMFAKEDTDCCTRQFCGTARPFVMNVTDNAGQQLMMMKRPFRCQASC
MWCCCLQEMEIESPPGVLQGTVKQVWTCWTPKYRVYNSQNQCVFTILGDCCYCKCCADVV
FRVFDGDGEANEVGQIVKHWGGCRELFGGANDFSLKFLADMDLMRKMLLFGATFLIDFNY
FEYRGNN
>Cuni_T009692-R1  Name:"Similar to FucTC Alpha-(1,3)-fucosyltransferase C (Drosophila melanogaster)" Cuni105:514502-532515(-)
MLLFQPPWFSSHWKKTMALLIGVTLIILTVSDALLFHVLVPGIPHHLIKIQYMSYVTSDT
SSNNFTNNTSFSEEEKKKQLYEPAEAHSFKSPYISTPKIYSTNSSIRNSNFSRKHKVISC
YNCPQWFILESLNLHNRDFKVCPYSECIFDGGDRKSTADVLLFFVGALGKSTLPRRPAGQ
IWVKCYWESPAHYGYPTPYKPWMNAFNWTFNYRTDSDIFAPNNRLAWRNSAHLLPDSAYL
EISQKKTRNVAWFVSNCHTQSQREVYVKEMQKYIDVDIYGNCGTHSCKRAEEGECERALT
STYKFYLSFENSLCKDYVTEKLFRNIEFRSHIIPVVRGGFDYNKYIPSGAFINTANFSSA
KDLSLYLKELGQDHVRYARMLKEKDKLTTLNYKFDWCDICEKVHTDNRTKVIPDIKEWSH
KDACYAPADIGKS
>Cuni_T009695-R1  Name:"Similar to Bud13 BUD13 homolog (Mus musculus)" Cuni105:752821-755312(-)
MKHPSLWLVLKMTRIWMRCSDRRKDWKTPMLDFIRKKKEKEDKKTGKKKKNELPKYKGPL
PPPNRFNIQPGYRWDGVDRSNGFEKKIFASQANKKAIQEIAYKWSTEDM
>Cuni_T009685-R1  Name:"Similar to Cnn3 Calponin-3 (Rattus norvegicus)" Cuni105:277903-298917(+)
VASKYDSGSELEVKNWIYQLTGEDIGTGVYEVERRLRNGQILLKLVQAVYAGTPNLPPAA
RNIKLKGNTSPLPFKQMENIEIFLKAVEAYGVPSNSLFPTADLFEGRNMAMVISTILQLG
TEAQRHGFNGPVCGPRPSEKHVVEFTPEQLRAGQGIIGLQAGTNKCASQSGMSFGAVRHI
ADIRADDASREGQGVIGLQAGSNKGASQSGMSFGAVRHIADIRLEDASREGQGVIGLQAG
SNKGASQSGMSFGAVRHIADIRADDASREGQGVIGLQAGSNKGASQSGMSFGAVRHIADI
RADDASREGQGVIGLQAGSNKGASQTGMSFGAVRHIADIRADDASREGQGVIGLQAGSNR
GASQKGMTMGAQRHIADIKTDNITQASHATINLQYGSNQGASQAGFGPGRRDIVGN
>Cuni_T009696-R1  Name:"Similar to SPR Sex peptide receptor (Drosophila melanogaster)" Cuni105:804212-804424(-)
VFSLFANFFILLSYPLNFFIYCGMSKQFRETFKRLFTGAAMPVEREYSQYMTLPTENGKS
TAVTGDETAL
>Cuni_T014967-R1  Name:"Similar to PlexB Plexin-B (Drosophila melanogaster)" Cuni1050:54707-55744(+)
MGPRLLQGAIVAVCLLDLVLPLTILHTFRDPEDNSFQLMALHDSTGALYIGATNRLHKLT
SDLNLIQSAATGPREDNPECPPPILPCEKPKMATDSLTKGLVIDSDHDSVILCTSLFHGS
CQILKLSNITSVTSFAQKPSVPNDGSSCVMFLAPGPQNETSLYIGAEYSPVGDEAYRDLV
PSISSRDLKTLELAYRDKEGGTKMSIKQDIRSEFKVRFVAGFSYSGYVYFITVQPKGLKS
KEKVTRIIRLCQGDRYFRSYIEIPLECQDTSSSSTIVAQAASQMEDGRLVVSYSPDGSSV
RASSSVCVYRLEDIDLMFAQTVQDCYNGQGKVGPDHYETIRTCMRT
>Cuni_T014969-R1  Name:"Similar to PI16 Peptidase inhibitor 16 (Bos taurus)" Cuni1050:205350-210300(+)
MWSRGLMLVVVLVCVAIETSQAASEWNQATQDFIVKLHNDRRRQEGGCHINKLEYDQDLE
NQARQWAERCVFKHELKEGRGENLAWNTNKLSENELIKHAADAWFNEKQRYSYGQNSCGS
SAACHYTQMVWGTTNKVGCYSTRCGQLSGAAPNAWYLVCFYTPKGNWNGEKPYEKGCSSP
CLEGQTVDNGLCAGEPVQAKNQGPDEGDCDDEVGSCALWASNGQCETNPKYMKVHCLKSC
KMCVSEEECEDLHSNCSVWAKSGQCQSNPSYMNHNCKKSCGKC
>Cuni_T014971-R1  Name:"Similar to gpt2 Alanine aminotransferase 2 (Xenopus laevis)" Cuni1050:249571-258645(+)
MGSIDEHVLTLGTLNPNVLELQYAVRGPIVIRATELEKELKAGVKKPFTRVVKANIGDCH
ATGQKPITFIRQVLALCNYPDLLDSDLFPEDVKARARRILDDCKGNSIGSYSDSCGLQVI
REDVARYISERDGYPSDPSHVVLSTGASDAIKSVMTLLLTAKGGNDRAGFMIPIPQYPLY
SAAISEYGAYPIPYYLNEKNKWSLDVAELERSIAEARPHCQPRAIVVINPGNPTGSVLTK
ENIQEIIKFAKREKLFILADEVYQHNIYAEGAAFFSFKQTLMELGSPYDQMELASFMSAS
KGFMGECGYRGGYAEVINLLPEVRANYYKSISAKLCPPISGQAVVDCVVNTPKPGDPSYE
LFIREKEDVLAKLKEKAALITQLFNSIEGISCNEVAGAMYAFPRIYLPEKAIKAAEAVGQ
TPDSFYCFALLEETGICTVPGSGFREEEGTFHFRTTILPPVEELREVLTNFKTFHLNFLA
KYK
>Cuni_T014970-R1  Name:"Similar to PI16 Peptidase inhibitor 16 (Bos taurus)" Cuni1050:224982-236514(+)
MLTSGLFLAGLLFVVMIQTSQAASEWNQETRDLIVKIHNDRRRQEGGCHINKLEYDEDLE
KQARSWAERCVFKHEMKEGRGENLAWNSNKLSEEELIKHAADAWFNEKDRYSYGQYSCGN
SAACHYSQMVWGTTNKIGCYSTRCGQLSGAAPNAWYLVCFYTPKGNWNGEKPYEKGCSSP
CLEGQTVDNGLCVGESTEEKNNKTNEAKCDDKVGSCGVWASNGECQNNPAYMATHCRKSC
KICESEVTCEDLNSNCPEWKRNGQCRANPTYMKHNCKKTCGEC
>Cuni_T014968-R1  Name:"Similar to Plxna4 Plexin-A4 (Mus musculus)" Cuni1050:103973-154477(+)
ILIGPNQATKVTQINLDVSEPVLDIINSNTEERVYVLTSTKVYLINTNHCEGRQSCDQCV
DGIDPLCGWCVMENSCTLKEPCSASAFTPSWLPATENTCLNISDVDPSVISYQALQESAS
NDKLLKFSLESVLLTSSKDLDLGCMYKSGDMQHRTPASISNDRHITCPLPQVGKLAKIPQ
GKDHEQVSVHFHVKGRSIVTRSVSIYNCSAHTSCESCAKSTFDCKWCYATGRCVEPRVGC
AHPDGSTATWIDAADSCPKIWSQSKDSGILVHSGQEKQIAVRVMNAQDGQTSNVKCAFTH
SGKVKIVDATITSSSLTCNSLQFSFDGDSPYAIADFRVTWGPLNLPLDNPSGIQVRIYKC
QQMVSYCGQCLSMDEEYECGWCQGSCGDTKKCEGKCMLQKHCSSNWLDRTATCPNPQITR
FSPTTGPIKGSTLVTVTGINLGKRYTDISAEVAGKPCSVKPDHYQPATRFVCEAGQVDVE
SSGVISVTVDGQYTAKSDSEFVFVDPVLTSLIPNSGPVSGGIVVTLIGDHLDSGSDVTVK
MASGLCQVVKQNKTALECRVPALTSKTVSEKIEVTFGGYRKEVPEAFTYKPDPTISMIEP
LKTILSGGTSITVRGDGLNLIQKPEFVTTYGGMFFREGCEVMSVNIMECRVPAINSQNIN
ITETSPLEVHYSFKMANITSLRNISHNATFGPLMYYPDPSVAYFEEEDRTKTFHEADLLS
IQGRFRMVNVLMASVRVFVGDEPCSETSASDLAITCKPPTSTPKGTDASGKAPVTVTIGN
MRSVPGYLRYFLPSESSRPITLGVVLGVVLPILFIVVLLTICNFIPDVLKDYEGKKEGED
EEELIGMDNIPVKVDMNGGGQADRNSDSTPYINELLAKFEEPALKQSMAAALISRRRLDI
GDLIGKGYYGAVYKALYTHSDSDKQAEVAVKTLQARRSEAEALQQFLQDVALVRDLSHPH
LLRVVGAVISSSDDPIVVMPFMATEDLGSYIREPAKTLSLVDLLTYCHQIADAMAYLENL
KIVHRNLAARNCIILEEDSKEPSIKLTDYVVTASLFPKEFYNGDDGVSELVRWMAPETVE
DFTFSSHSDVWSYAVVMWEVLTRGVEPYPNTQAAVVVSLVKEGKRLPKPKHCPETVYQIM
LRCWTKSPESRPTFVQLLEQLKPYVASGDRNGGEKSQLVTSPVDVGGSDEYKQLSG
>Cuni_T012090-R1  Name:"Similar to Heat shock 70 kDa protein cognate 4 (Manduca sexta)" Cuni1051:179096-180459(+)
RLSKEDIERMVNDAEKYKNEDEKQKARISAKNALESYCFHMKSTIEDEKLKDKLNADDRK
TISDKCSEVIAWLDANQLGEQEEFEHKQKEIEGVCNPIISKLYQGGAGAGAGMPNFNAGG
AGAGAAGSGSSGPTIEEVD
>Cuni_T012094-R1  Name:"Protein of unknown function" Cuni1051:488407-488808(+)
RHGNVNRMVSVSHFLLLAFTLAVTFTLMASHELDYLEDADLDSEEDDFLGKRGFADKRGF
ADKRGFADKRGFADKRGFADKRGFADKRGFADKREKISPLVLRMLQRSYQNQALPLTGHN
SFNRLLAREGFLE
>Cuni_T012092-R1  Name:"Similar to Ppig Peptidyl-prolyl cis-trans isomerase G (Rattus norvegicus)" Cuni1051:246951-270254(-)
MADTVSVSGHRPRCFFDISIGEQEVGRIVFELFADVCPKTCENFRALCTGELGTSEKTGN
TLHYKGSLFHRVVKDFVIQGGDFTKFDGTGGESIYGGVFSDENFQLKHDKEFLLSMANRG
KDTNGSQFFITTKATPHLDNIHVVFGQVLSGQDVVRAIENLSVDQKSRPTSDVKITNCGE
LVLQLKSK
>Cuni_T012093-R1  Name:"Protein of unknown function" Cuni1051:387623-389097(-)
MCCVCISFRSLVRVMSIFIAYTCLCVTTNSSCSYRQPCCCPDDVCFTSYNFEEALMTIQC
VRWRLSKVVYPRLTA
>Cuni_T012089-R1  Name:"Similar to HIBADH 3-hydroxyisobutyrate dehydrogenase, mitochondrial (Homo sapiens)" Cuni1051:108609-140338(-)
LPIGFIGLGNMGGHMARNLLKKGYPVIAFDVSKDSLSCLQEEGATVADSPAGVASSVTRL
VSMLPASQQVQEVYAGKQGIFSTVQAGTLLIDCSTIDPSVSQQIATQAEQHGAMFLDAPV
SGGVNAARDAGLTFMVGGSESSFNQAKVILDSMGKNVVHCGVVGTGQAAKICNNMLLAIS
MIGTSETMNLGIRLGLDPKLLARVLNMSSGRCWSSEVYNPVPGVLDGVPASNGYKGGFGT
ALMSKDLGLAQNAAIATKSATPLGSLAHHIYRLMCQHGLGSKDFSSAFQFLQEQDKH
>Cuni_T012091-R1  Name:"Similar to Nktr NK-tumor recognition protein (Mus musculus)" Cuni1051:187874-239796(-)
KAEDKAQASSEFADIRVDEIPDIPFQNFLYRGQKVEEESKQSKAQEEIEAKPEKISPRRK
DSRNRRPVVSASGRKLKGRGVIRFRSRSRSTTPPHWKQEQRRAIPMHKAKEMEEKKWSKG
EAIAAPSSHRKEEKKWNKREDIEAPSSYRQDHKATLSAGSVGRRHHSSDVVEPEKSLENG
KHKRSPKDKDDSRKEKKKKRSGLDMSSHDDKVEKKPKDKGPKDQSEDSDIETGSGCEDGE
ITSRQDNNLAKERSKEARSRREKERNRSDFSSPDAKKGSRSERHNTKLDKTTDRGERKDS
QKRERRNSWSKDKSRGSRERRASYSTQADSSNTSKSAKHGQEESLRRQEKKPDRFEDATS
RQRKNRSRTPKRSAKSKWNDGKHSRSRSRSPAFRRKPSYDGKHQSRSEEKRPSRSQSKSD
TRYKWRDERSRDLKKRRPSESSSSEDREDKRRKKDNSSPGKTLKNGNRADKLQNPLDEAS
LSMLQETEAFLKAQLAAENIDESLSVAGSNTVTSNSKILYKLDSGEQIQYNVTSDHQSSV
TAAGDRKQEGQAKSRALARSSSRSRSQSSSRSSSRSRSRAKELKAKVSRDKKQRRFGGQM
KWEPPLEPEDADRDPELSQSLCVFMSFICFRQKHQNTPLENAPRLAVRRSSSSSPSPARD
KHRSRSHSSSRSVSHSRSGSESPSHLRASLLEQKRHKASMGEENIRTEPGENGGRAAVNE
ERQISVGSRDVINEDGQLAGGEKRPAQDLDRDRSRSSSSSPEPPPVIPRVHRSHSSSASL
AELPPGQTELSAETVAAGETVVPETSDAVSALPSDGCVQSPQHPADTPQDSCGDTSVPCV
GMQDSARLLSDMPLDAISDPHTSVLVRPPPLPPLPGSLSAPALPPVPIDRPVSTSAPALP
PVPIDRPVATSAPALPPVPIDRPVSTSAAVAAAPVPIDRPVSTSVPAQPPVPRDLSEIKS
IPMPPLDHKEAVLAAATLDPLQLANVPLPADLGTSLDKACKKCTSITDLETAADCNKPLS
AQTLADTTEASRASQIPAERRSRRSGSQSDQSRGSSSSSSSSGKRTRRVVPASNKPNDKD
SEKTVDSQMQHTTDTNRETTKKHTKEAASNKSSKSLETAAAAKSKHSEKTASIDQESSRS
KRPSSSSVRSKKQSKSRSRSQDKKAHKRSPTSVSRRRSSSRRDRRTPHKRRSKSRSPRRR
TPPRSAWPSRRSGRYDRSPPLRRRSRSKDRQSHRVRRRSDSHSRSGSSSHSSDSSSRSSS
SSSD
>Cuni_T012088-R1  Name:"Protein of unknown function" Cuni1051:90406-98262(+)
AALGCGFFIAAIVSSLSNVSGAHLNPAVSIAFLVTRQITFTRKTPECTVSKIKSTTMIAM
MIIRRRRMIMLDIY
>Cuni_T012095-R1  Name:"Similar to Cont Contactin (Drosophila melanogaster)" Cuni1051:499820-505306(-)
INYWHEEEQMTDWKDFIRHEGQVDKGLVIGLKSDNFYYFTIQVYNSAGLGPMSEYFFQET
LHYPAAQYPEEIRVYSASGHHVEVWWRGIHISQPEGNIYGFVIYYWPANENYRTACQHVV
HDHHAHHAHIDVEPGVVYALRVSAFGEGGYGKKSLTTYFTL
>Cuni_T012087-R1  Name:"Similar to CCDC13 Coiled-coil domain-containing protein 13 (Homo sapiens)" Cuni1051:10802-57039(-)
MNGEGHREQFHILQAQQQQKLLERRQKKEEMNKHVEKKTENKETNLSTFGVTDDLCLKTR
DSPDDGSYISQDHLSDQIRQLKDENGRLCKLLLEKDFEVRQIKKKIDENRNICVDGGLTN
ELAATKIIELSKKIRDLTAEKEAEKTRCKQLQKKCHDLQAQSLLTPATMSVETSAVRLHP
NGERNGDDDGVDVKLLQDRLKQSETRATDFRNQCLSLRQELKVAHKVLCQEIGENINFQT
LLNESSNWRGRAQQILALQGKVEELKALLLDGSATDGEKNTNAKRRQEEKYKDELRKMEK
DRKEAQENTAIKLKNLEAENHSLLEKLDAGKARNHVLSNEIKTMKSQLQMLLKKSRNDDE
FIDALMKQQSQLKQLLEDHNKQQSQHEHLQQQQLQQMTVRSQHDHNIVEQLKTVAAQKEA
QVKMLEMELLHLKMEHMNTHTARTSQHSLCGSDLQPAICNSTRPLTAADITQPQTSHSTR
PLTAADITQPQTSHSTRPLTAADISSRKPVTDETHVQEMTSLRFHNAEIQVMNLAIEVEK
DKMTELVQVLQERLSEETRRLAEAEANLQAEKRQTVELEKRLAKANLIAQRGNGVSKNLN
SFQELGSKDNSELLARSEIQKDEIDSLKAALERTLKAKTEDMKVYSATLEETKKVFLQAL
RQLKEGQTLSFIKS
>Cuni_T015136-R1  Name:"Protein of unknown function" Cuni1052:291161-302177(-)
ERGFYRIPASYQRADGKCGDVAYERSPQYPHMWFKSICNPKGDTPCCHTNRCINVSETDC
RCPTCYDERQSIHAEYAQWKPEDDRCMVKNFTSVEACSLLNGTTLHFVGDSFIRHVFAAM
VILLTNNPEGAIKASSPQKVRDHCQGMHQITWSECRDYLDMNRSLCGGTVKVKIKNNTDV
GHTKRLPDLVSSDFPKSHILKAENLDISNSSRVRRKADTGNSPLPITSQTSPRTTVDNKP
WPRLLWIGAHSPGLLKSSKFSEQTAAGVQSFNKNVYKVLNDFKVPYLDTFEMTKGVVSFD
GTHYGYGINMLKANMVLTYIQHELSRDPEWR
>Cuni_T015131-R1  Name:"Protein of unknown function" Cuni1052:54939-56891(-)
MASPENQPLGVQSSPVLSTAVPEWSSEPVLLKDFASKRQVPGFAKVVKGTYMTLGSNKFS
FQKQHHEVFIHSVKVGVKVLAHCLRRMEATGILRRGGHNVYATTRLYALDQRLAIPISYQ
GWFELLSEDGKSARPITSVMELAKFNPERCLVRENMKAYLMGDDGRLTFDKFRVLLAGEQ
IILNGELTLPSPGENKKVKMLRCLDSKGEIIFLGFDQSGMFTPIAGENDFAGVFNIRDVV
KRFRLPLTVKLVQGVRPKVDPSRFTGLIRLDWVYTDETAFVCPVEKNHVRLLPVPVDVNL
QVVSALNEQEIKSTELYRSMMMRCNRMISNYNNTLHLIVQIPDVVASRGKNRSSNMFSIP
FQSETLGPSSARAKSREMRLMDEIDDLYAYVRDGGAPPTKSKFTYDSDEESYWEEPAYEP
LDDFRARLRALEAGERVNYHSKYQPKDPRHLILDSEHDLRNGTMNGSPKVLRVQQDSITS
QVPPLPPRPLDLPSNPPQSFSATITSPSVDIEDEDKTPTNKVAPEMLGKQQMRNDGDITT
VYNLGLVSSQSTLGISPKPTQIPQEAVQRSKTFYYTKTSGPQTSKKDRLVVSKKESPDSS
NSGSSGNGHRNHIARDFKDSDISSLAKGGSSGSSGRGPSNVRKKIQTMYL
>Cuni_T015133-R1  Name:"Similar to DNAJB1 DnaJ homolog subfamily B member 1 (Bos taurus)" Cuni1052:103859-104950(+)
MGKDYYKILGISKGASEDEIKKAYRKMALKYHPDKNKSPGAEEKFKEIAEAYDVLSDPQK
KEVFDRYGEEGLKGGMGGGGGGGGGAGGAGGRPGNFTYSFHGDPHETFRMFFGNENPFES
FFSFGGPQGGSSGGGGGGGGMGGRSPFFQFNTTRGMDDEMEVDGQDPFGQFGQTQGQRRK
QQDPAVIRELPCSLEEINTGTTKKLKITRKVLNPDGRTTRSEDKILAIDVKPGWKAGTRI
TFPKEGDQTPHNVAADVQFIIKDKPHPTFTRDGSDIRYKARISLRDALCGTTISIPTLSG
RKIPLQLTEVIKPNTVKRIPGEGLPLPKNPSQKGDLIVEFNVVFPNSIPQTAKEILKDLI
PQS
>Cuni_T015134-R1  Name:"Similar to DOT1L Histone-lysine N-methyltransferase, H3 lysine-79 specific (Homo sapiens)" Cuni1052:118454-188490(+)
MVGTMTQKLKLHSPVGSDPLILKWPVPTSEGKDGPEEILDTIRLVCDDYPELKTPLETRI
LKDGEDVSNYDFEQTKAMCERYNKAIDSIRQLVKGQPRQKAVSKQASMKQLKHILQQCYN
HSVKDPEKLNHYEPFSPEVYGETSFELVEQMIKYVKFSESDYFIDLGSGVGQVVLQVSAA
TNCKFCYGVEKAEWPAEYAQVLEKEFKKWMKWFGKEHSDFQIEKGDFLHDDVKEKLSKAT
IVFVNNFAFGPVVDHELKQRFANCLKEGARIVSSKAFCPLNFRITARNLSDIGTIMQVEE
LSPLCGAVSWTGKPFAYYVHTIDRTLLEKYFQRLRFPSQKNEDEPRKDRKGRPLLSIKDK
INGALSGGSDSNSSGRWRRAKGVQRETETASPLSAAKVLDFDSGSNSSFTNSASVPATDE
TSIVYGPTTRRQWNEYVKRPQSQSGTENDNDSSAADANSVDLKVQDQVSEVTQKKKKMKS
VKRLNNGALGMRKMQGKKHTEPVASKAAVKLRPRKKQTVRSSSSLAKRAASVAAAAAAAA
STASSVSTTTSTVSGNLSAHVNGTVTPSLDSLNLLHAHTIMSTSGKDPAEKVNYNDRRMT
ETSSAYFKPTVQKQTVSMLEKEAGFLQMM
>Cuni_T015135-R1  Name:"Protein of unknown function" Cuni1052:273962-283349(+)
RGKLNTADNRDASSTLHNDKKTMIKDSRCPNILSGMNQGQWIKRPLTSQEQIPPSYQRND
GRCGDVSYDQSPQFRHMSFKAICNPKGETPCCYTHKCINVSETDCRCPTCYDERQSIHAE
YAQWKPEDDRCMVKNFTSIEACSLLNETTLHFVGDSFIRHVFAAMVVLLTNNPEGALKNT
TPRSNHLNTAANISRNASELCISQEKKNYTDVGQSTNMPDPVSSDFPKSHILKAENLDIS
NSSRVRRKADTGNSSLAITSQTSPRTTVDKKPWPRLLWIGAHAPGLLKSSKFSEQTAAGV
QSFNKNVYKVLNDFRVPYLDTFEMTKGIVSFDGTHYGYGINMLKANMLLTYIQHELSSDP
DWR
>Cuni_T015132-R1  Name:"Similar to WDR83 WD repeat domain-containing protein 83 (Homo sapiens)" Cuni1052:70253-86710(+)
MSYPNRKTHTLDCKQGAVRSVRFNVEGNYCLTCGSDKTIKLWNPLRNLHLKTYTGHGYEV
MEAQSSSDNSQICSGGMDKAVVLYDVSTGQTVRKYRDHAGTVNCVSFNEESTVILSGSID
CSVRVWDIRGSKHKPVQVMDEAKDSVTSIQVSDHEILTGSADCCIRRYDLRIGRMFSDFV
GKTVTCARFTRDGQCVLVGSTDASVKLFDKDTGEMLNEYLGHKNSNYKIDCCLNHKDTHI
LSGSEDGCVYVWDLVEATLVHKLDHEVSRTVHSLSFHPQDPVLLTACGDKVIVWESNEST
DT
>Cuni_T019127-R1  Name:"Similar to PTH1R Parathyroid hormone/parathyroid hormone-related peptide receptor (Didelphis virginiana)" Cuni1053:16106-19898(-)
PVWDNLMCWPHYVRAGENVTQPCPSYIQGFNRLEKALRFCKEDGTWQTHPSDKINSSWTD
FRHCMKESDHTEHMPIVIQISTIGYSLSLGTLIVATTIMVLFRQVIL
>Cuni_T019128-R1  Name:"Protein of unknown function" Cuni1053:92214-117676(+)
LSFTSSKDIDHFSSNNMVTNSQNVSNSKQLLISYVSAEAAEHAVNLKRKLTGLGYSVFLD
VHEIRSGVDWQDALNYAVSNCEVFIPLVTPRYGETQWTNREVKLADVLGKPILPVSFLEE
WPPKCLAIQFATTQFIWWKSPECISLELASGYGAEARNIRIWKEKYIEIVAVEIEKRLKI
MKSAKVSKPALKRMKTLVKTFAGRLPATISPELTRQDSEELQGPQIVICVHPCEASYGFQ
LKDWLEEAGYSVWTSPNLGHFSSYGKIDLISSKEAVQHNETGEKKENTTEIVRTDEAESP
IKITAGQVNEFQEVVDRATVVIIVLSKAFTESWICRQQVYYCEHRKQILPIVYEEFRVPC
WLKMLIRTKKLLSVNKSSFYQILLMQVKRALDPTAKNCLETDSLEANKTLAVDYLRKSLD
VKYCVYVSGATKFSDARSEAVCRSIGTHLAKLNNVAVVTGGCYGTSERVGRTFYEECKKR
SLKSTVWHILPEQDSQDMSERYNQSSDGTFALKDFGQTLFCGNSVWEKEAIVGRCFQICL
LIEGGPDASHEVEEFVWNDHIIIPVYCAYETDTIREECRATGKMFPLPPGVSEWDWKCLN
DRTTSVEGVGAAVKNIIADLLQHLNQQAELPVEDEPESPLFSDA
>Cuni_T011828-R1  Name:"Similar to Mrpl18 39S ribosomal protein L18, mitochondrial (Mus musculus)" Cuni1054:60563-76621(-)
MQRLQLLSVCRNKVQLSQLSRHIFGFCRQLSTSNRHFTDSQNKDYVVSRVFHNRNPRNLE
KLALAKKRTGWTYQAPRRDYYHKLVICHTNRHTEAYVQHFSGEKVLSASTNEWAVRNQLY
SCTDVSASIAIGKVLALRCLQSGITSLFYDDAEKPSEKTSCVLQAFKEANIALTEPTVIE
AEYRPGINYDGYNRYAEPKEWKEDYQDV
>Cuni_T011832-R1  Name:"Protein of unknown function" Cuni1054:209087-221453(+)
MWETLRKRNLNLFLLLLIASLIFVVVVQQSSLIRKMAVLYGSLINDKSDNILKQKTEAAL
MFDFKKHADYRLQVLQTEMSSMAKLDVCAKILANPISFWRSQLTSTNFTAEVDLQRLSLA
N
>Cuni_T011829-R1  Name:"Similar to tup11 Transcriptional repressor tup11 (Schizosaccharomyces pombe (strain 972 / ATCC 24843))" Cuni1054:78812-99120(+)
MSGDTADTLFDFHETRLRSDSHGDVASEVSSYSRRSSLYSHFSRSKAGPFLEGNLKLFDI
IELSSDVMCCRFSSDGTHLAVGMCDGTVKIYNPLTCQQLYMLQDEDTNKSRLPVTQVKFR
PYVEGEKTEYSHIIIASYASGHVKFWHYTSGKCLHTVTEGRQTLALTINPEGTHILTAGS
DSKIHMYDIETKQKINTMEPSDAHDVMDGHRFRVFALQYNPNHPHVFISGGWDDTIQYWD
DRKVHSIKKFIGPHLCGDALDIDPVHNHILTGSWRKSHVLQ
>Cuni_T011834-R1  Name:"Similar to NXPE1 NXPE family member 1 (Oryctolagus cuniculus)" Cuni1054:260581-269150(-)
NKNLTRLTSSKNCSTISPRETWEQPEPTGYMYKGLWHSHLCRRPERVTDECLRNIHIIFL
GDSNGRELYNDVRSRSSCKDLLTAAKKKWHKNLKCAHDQLNFTLEWVPHSLPFCTDAAIW
SDIGWNAASNKVIDRIPSTGRYLIYINHYLHATGSHISAYIAVMNAIKDSIKRLLMRNPD
VFIAIQGPLTICPFGNRPFFLYGDMLRQFFAGVQYQLFEDLRDHVYYMQTLDITIVTQND
NSHPKHNWQISNQLTGFICGRQ
>Cuni_T011833-R1  Name:"Protein of unknown function" Cuni1054:243323-245470(+)
VLFLGDSNGREIYRDFISRSSCKVQISEDKIRWHKPLKCANESLNLTMEWFPHSHPFYTD
SDAWADNNWITAANKVIDAIPSNGRHFVYINHFLHLTSTHISAYVAMMTAIKESIKRLLM
RNPDCFLVII
>Cuni_T011830-R1  Name:"Similar to hira Protein HIRA (Xenopus laevis)" Cuni1054:124918-183155(-)
MRVVKPGWINHDGKPIFSVDIHPDGSRCATGGQGDDYGKIVIWNMAPVREASLESDENVP
KILCQMDHHYACVNSVRWSHSGKFLASGGDDKLVMIWQTSRGAGPSTAFGSTGSVVLHEQ
WRPVFTLRGHAGDVLDLAWSPQDVWLATCSVDNTVVIWNALKFPEQVATLKGHTGLVKGV
TWDPVGKYLASQSDDRTLRVWRTIDWQQESLIVDPFKECGGTTHCLRLSWSPDGHHIVSA
HAMNNKGPTAQIIERQGFKASLDFVGHRKAVTVVRFNPNIFKKKFKGEKAQQYSCCAIGS
KDRSLSIWLTALKRPLVVMHDLFENSILDLSWSPNGMELMSCSIDGTVAYMDFSTEEIGN
PLSKDDVVNLLEDIYGKGTSLHLAATKGSQIIESTAMLNLQQQQKTRANEAIMLTPSKGN
SNMSTKMSASGDNVPFKPTDKQIETRTADGRRRITPIFLAPQPEFGEVPVPFSIGFHSSS
EKSKIVVEKQNRVTAPGMLSPTSGSKSMPSPPQTALPVSSAVRDLSAMCTKDSQAMKSIN
ETTPEKLVNKIQMENPPITPDKPTSSEQCEKSPQPPAVSDKLKQSDKDNKDKEKDKETVK
ESSVHKDKLKARLSSGSLSLKRKYADDKRHGKRGRPSKTDQAAREAAMAAAAAEVVGSIS
RPDITAPQVSLTPGLVAPALQKESRPVYAAPDLQLPALTVENSLSRVIQGQMGDANSLVV
DVENNLELGMIRVHRLRCLRGAKVMWDHMLTSKISAVAGSNHTICAACLDGTVSVFSIGG
RRLLPALVAGAPPAYFSCKGYYVLVVTTKGVLYVWNCQSLKAEVRQESLATIMSDKDKID
QVILTTEGVPVVTLLNKKSYSYSTDVGCWILASSDDDRLQTCSSHHQCTPSKIKPLGTLS
SLQKQSRSGEQASRAFQSNPGAQQSVTLSYLESQIASSLALRSATEYKFWVETYIRYLAH
EGLEEKLREVCDELLGPLYRSRSSKTWSQYILGIDKHTILRSTLPSIGADLKFQRLYTEY
KDQLDSLPGT
>Cuni_T011831-R1  Name:"Similar to lbp-5 Fatty acid-binding protein homolog 5 (Caenorhabditis elegans)" Cuni1054:185571-190972(+)
MATTADEDVRVQEIASKFAGKWKQVRGENIDDFFKEMGLNFLLRKLASQANPEATTTYEN
GKLTTKQEPVAGNDSKPTVSVREINEAGELVTTVYVGDVVCKRYFIKLPSS
>Cuni_T011835-R1  Name:"Protein of unknown function" Cuni1054:281836-296987(-)
CQLFPFPDFIKTPPVPTPYDFEASYLEDPPVTDILKTSLAKRSSVVLVNSSSNFFIGDTV
ALLITIRDAEGNLKTKGGDDVRAWFTDVSSADSLLPTKITDYGNGTYLATAVLAFIGIFR
THAGLAYSREYKQTVVLTHLMIKSAVIYFGAYRNAIVSL
>Cuni_T009748-R1  Name:"Similar to CDC42BPA Serine/threonine-protein kinase MRCK alpha (Homo sapiens)" Cuni1055:98149-189029(-)
MSAEQRLKRLEEVFLKGAAKSNGLALSVESLLDSFLVLYDECNSAGLRREKNISEFVEST
RPVSTFVRQHRLQRDDFETLKIIGRGAFGEVAVVKEKSTENVYAMKILNKWEMLKRAETA
CFKEERDVLVYGDRRWITNLHFAFQDDNYLYLVMDYYCGGDLLTLLSKFEDRLPEDMCKF
YVAEMVLAINSLHELHYVHRDIKPDNVLLDRSGHIVLADFGSCLKLMEDGTVQSSVAVGT
PDYISPEILRAMEDGHGRYGPECDWWSLGVCMYEMLYGETPFYAESLVETYGKIMNHQTR
FEFPTDVDDISPEAQDLIRRLICPPNTRFGKNGLEDFKGHSWFSSIDWANIRDMDPPYRP
EVTGATDTSNFDVEDMDFKHTDTVPPTSHATFKGHHLPFVGFTFTKDCKLSDLGVLMPDS
GDSGDKKPEAIQNEIFERKIKGLETENREMNTRIQEYLATICQLQSLENSGGAASGPDEN
DSRQLKEEVAVLHRVIAESQTEIGSLEQELKRSSELVLDLERKLRLSEDEKTAFEKELQE
ARDKYKTQSRELKEALNKQKLAMDEYTDINDQSETSKEHRLRERAELYAQDLEAEMESLK
RRQMGRLATTSVVEMTQEISRLKAEIEEKKLEYEEKMSRLTSKHSSEINEIKYQLQDSDN
KKSELEREVAKLQAKLTEQLHSKELQERITVLRSQADNADHKVKALTEENERLQEESVSQ
SNRIDSLMRERSQMEEEIREIYDKRESVAQWEAQISEIIKWVSDEKDARGYLQALATKMT
EELETLKVMGVSDESNRHRWRNRRSAKMEKMELLNLQSQLQSELQAKQQISAELSRTKDE
LTTTENKLQESTKLVNELKAKVEDLETKLNKANDNWESRRGDNTSIFEYLNDKYALLPDQ
ISIESEREEDSEADNTSRTDSRTDSRTDLRLGSDSEPSVPREIPYTQPYEPVRSWGVSTT
GSPIQQRLGSQGSTDTPRSPKSPHGRQHRFIVKSFQSPYKCNFCTSLLVGLQRQGITCEA
CSYTCHVWCMDKCPDQCPVPPELYKRPYGIDINKGQGTAYEGFVRIPRLGGIKKGWAREY
MVVCDFKLFLYEIPADKTWPNQEVQQVVDMRDEEFSVSAVSPSDVIHANKRDVPCIFRVT
TSEMNPPGTQHQILLMADNEKEKDNWLKILSQLHIILRSRNLPNKNVYSAQEVCDNSLPL
VKSTYCAVILDSSRLILGTDDGLYIVDLTKDQFVRIGDRSERKQVFQVDLLQEQQLGYLV
YLSGKQRHIKLLHQSALENNDCEPLKINETKGCQIFCHGEIRQPHGGNSCCLCVAIKRTV
QVYEINKTRQKYRKMKDIQVAGQVQCIEMMSDRLCVGYPSCFAIYCVQGDAAPMTLVSTE
DNTLSFLVKNPIDAMFAVELSQKEYLLVFNIVGVYVNNSGNRSRQQEILWPATPVAVSYT
APYLACYSENSVYIFDVNTSEWLQTLCLKRTKPLCKDGSLNFINNFDSQHIVYFKDIKKE
EERLPVMDIFKQKSSRNKRRFSFKTLQEEKASKVPERRSREISGPLNFSHIAHVGPGQLM
AASQIAPPAQTDRRSRVISPPSNFSHIAHIGLDQGYQVLIDLPKTGAAAGSEEMQRVKSM
FQPQLKSIHETQGRGARPTSTQYNGTTGGRGGDNLPRRGRGSGRSLPPQVPGRGGESYAQ
QEQSSFEKEMSSQIFEDSMEPAGYWRRSVASNASSSLSPPSSNRQSLVEDDESSPPANVA
EAFNTQL
>Cuni_T009750-R1  Name:"Similar to GANAB Neutral alpha-glucosidase AB (Homo sapiens)" Cuni1055:246588-249702(+)
GKAEGKGGGGGGGDSCFIHPPPLHLLPTLNLHKGCKFTTTEWIERVIIVGVNTEPKHIHL
VIGDNKVELEHKYDPQTKVLTVRKPGINIGEEKWVINLH
>Cuni_T009751-R1  Name:"Similar to PLEKHG1 Pleckstrin homology domain-containing family G member 1 (Homo sapiens)" Cuni1055:272189-315768(-)
MDNIDEISRNSLNWEDFFGSSLELAPSLLNLYDHRIATGTKDKDTSGNHVGDRTGPKTRS
LPSKPRQDSFDGVQYRSEILPAERPVSMMDHGLSTPRSVLSLVDIKKRPLSISSVSSTSL
TSSPRLPKKKVIPLSADNTGIMKRDRHDSDCTLMPDCKSDPRVLSLSESRQSVDSGCVEG
EKNGDRYADSVSITSSDTGSCKDVRDNSPRDCSVLLSPLADKLNSVQALHQTHALNVCPA
SSSTESHESSVMATVDVLRLKTSSLNKQQAKNIASPEHIVKSKLASEHSFGNNPPRTDFS
GSPKNACSSPNSVSRQEARTKFFSNYEEYTRQSFSLPASIAEENIERSSSPLTTTSNDIS
KRPQPSSQTALPVAASDVTSHQAGPGHVSYHKKPPSPTSPELKPERRDRSSQLSPTSEKP
SRRSERYGPVSKHERQPTSPKSGFSRVSKKRDSHAPSDPWKTMEKLLDSEDDRKDIACLF
GNIRDIYTFGVVTFLSDLEAAGADPVKVAQCFVKYNKGFVIYTDYCTNYPRAVEVLTRFM
QHPSLSQLCKERQHSLGHALPLGAYLLKPVQRILKYHLLLHNIVKNCEKDREEAAVLEKA
FHHMTQMAHHINEMKRKHEHAVRIQEIQSQLEDYVGEDLTRLGELVLEGTFKVNGAKASR
QVFLFERGLLISKLKEGGMLSCKTFIPCSNLMLIEVIPNDPLSFHIIPFDNPRAQDTLQA
RNMEQKRRWCHDIKHQILESFKGRIPDNAKNLIMQLGKDWNDDYLSRDALDSGKRNQHNA
PEYLEKRRFRRKSGSRLPDFSLLIPQKTKK
>Cuni_T009749-R1  Name:"Similar to GANAB Neutral alpha-glucosidase AB (Macaca fascicularis)" Cuni1055:207737-242346(+)
MRHISLILGVLLCTCFGVHRENFRTCDQSGFCKRHRNLQPGTSNYVVQPSTLRISKTSLM
VDVVNTKTNVRFLLQGYGLVNSIFRVKLVEAEPIRERYEIPVGISLFAEPVEEELKYHGE
KDGTLTFSLGDNKMVINIDPLRLDFFISGEPVVSLNAQGLLKFEHTRTKQGWFSSLGSWF
FSLLSPFRETKSENEEVAQDAEGDQKVEGTQKQDDDEPDMWEETFKGFTDSKPHGPTSVG
VDIAFPGFRYVYGIPEHADSFALKTTKTTDPYRMYNLDVFEYDLYNPMALYGHVPFMVAH
NEKNTVGVFFQNPAEGWIDIQSNVADKSIFKNLADFVTGNNEVPQTDTHWYFEDGIIDIF
VLLGPGPKDIFKQYASLTGNTPLPPLWSLGYHQCRWNYNDQDDVRSVDQALDEFDIPYDV
IWLDIEHTDSKKYFTWDVTRFSNSQEMLRNLSSKGRMMVTIVDPHLKRDDNYNTYTDARN
KGLLVKNKDGNDFDGWCWPGSSSWPDFLEEHVRQWWADQFSIENYQGSAPNLYVWNDMNE
PSVFNSPEITFPKDAKHLSGRENREVHNVYGMLVHRATFEGLLKRSDYKKRPFVLTRAFF
AGSQRSAAVWTGDNMGEWSHLKITVPMMLSLNLAGIHFSGADVGGFFRNPDNELLTRWYQ
AALFQPFFRAHAHIDTKRREPYLLPEENMVIIREAIKKRYTYLPYMYLLFYESENTGMPP
MRALWMEYPKETRTFEMDDEFLLGDALLVKPVVEQGQTSTTVYFPGDDIWYDIDTYKTYH
GKQEVTVDAPLSKVLVCVFA
>Cuni_T009747-R1  Name:"Similar to Kcnk12 Potassium channel subfamily K member 12 (Rattus norvegicus)" Cuni1055:63081-63994(+)
FGMTTPRTIPGKIVLVFYGFFGCAGAILFFNLFLERIITFLAYILKAIHERGHRSKDKAN
SRRRSSQGSVDEELDSWKPSVYWVMLILLLGALVVALIASAMYHPVENWTYFEAMYFCFV
AFATIGFGDYVVSQKAEYPNIVLYRLGNFIFIVLGCCCVYSLFNVTSIVIKQVLNWILRQ
LNCQCKIRRPSLTLATTGLSKTPTVTVTDVEVDSDSEYRRNSGEMISMKDFLQANKISLA
MMQKELYETAQRCSYNNNDNGFQGGVGPLAILNRKLGQDEYDPAA
>Cuni_T011375-R1  Name:"Similar to alphaTub84B Tubulin alpha-1 chain (Drosophila melanogaster)" Cuni1056:331411-345213(+)
MFESSLNRDLKIKLIVTPKQHEHKGTLPXXXXXXNACWELYCLEHGIHPDGVMPSDKTVG
GGDDSFNTFFSETGGGKHVPRAVFVDLEPTVVDEVRRGIYRRLFHPEQLITGKEDAANNY
ARGHYTIGKEIVDLVLDRIRKLADQCTGLQGFLIFHSFGGGTGSGFTSLLMERLSVDYGK
KSKLEFSIYPAPQVSTAVVEPYNSILTTHTTLEHSDCAFMVDNEAIYDICRRNLDIERPS
YTNLNRLIGQVVSSITASLRFDGALNVDLTEFQTNLVPYPRIHFPLVTYAPVISAEKAYH
EQLSVAEITNACFEPCNQMVKCDPRHGKYMACCLLYRGDVVPKDVNDAIATIKTKRTIQF
VDWCPTGFKVGINYQPPTVVPGGDLAKVQRAVCMLSNTTAIAEAWARLDHKFDLMYAKRA
FVHWYVGEGMEEGEFSEAREDLAALEKDYEEVGVDSAEVEPAEGEEEY
>Cuni_T011374-R1  Name:"Similar to eef1b Elongation factor 1-beta (Xenopus laevis)" Cuni1056:301724-308640(+)
MGFGDLKSQSGLQALNNFLEDRSYIDGYVPSQADIAVFLAVGTPPPASLPHALRWYNHIA
SYDSQKDSLPGVRQPIETYGPAGAPATTAAAPAAPKAAAADDDDDLDLFGSDDEETKALK
AKRVEDYAARKAKKPVIIAKSNIILDVKPWEDTTDMEEMERKVRSIEADGLLWGASKFVP
VGYGIRKLQISCVVEDDKVSTDFLDEEITKFEDLVQSVDIAAFNKV
>Cuni_T011378-R1  Name:"Similar to Tropomyosin (Cornu aspersum)" Cuni1056:464592-471253(-)
MDAIKKKMLAMKMEKENALDRAEQVEQKLRDCEAQKSKVEEDLNNLQKKFAILENDFDSV
NEQLIEANTKLEASEKKNAE
>Cuni_T011377-R1  Name:"Similar to Tropomyosin (Cornu aspersum)" Cuni1056:420010-456539(-)
MGDREFLESNDGDSVHLSQDSQLSVASMSQDLSQGSVDADTTVACSKHRRSEKKKKKRPK
GEKSSKSRDNDKCERDRSETPDCDNSNSAIKHSRKSSKSSSKCENGEKSEKKVKRHSSRR
PEPEGGNPSHAETSSILEFERIINNTDPLFSDLEIDLAGDEDSLKPRRTPRQTRSGPAGG
IFIPCTQLGINSNTMIKFAIIGTELQNIFQVSQRIESETAGLQRRIQLLEEDLERSEERL
QSATEKLEEASKAADESERGRKVLESRSLADDERLDGLEAQLKEAKYIAEDAERKFDEAA
RKLAITEVDLERAEARLEAAEAKILELEEELKVVGNNMKSLEISEQEASQREDSYEETIR
DLTQRLKDAENRASEAERTVSKLQKEVDRLEDELLAEKERYKAISDELDSTFAELAGY
>Cuni_T011373-R1  Name:"Similar to NDUFS1 NADH-ubiquinone oxidoreductase 75 kDa subunit, mitochondrial (Bos taurus)" Cuni1056:270428-297777(-)
MQRLWPIGHVARIQNAVRIVQAACKSTQPVPSPNLVEVFVDDKQVFVEPGTTVLQACAVA
GVEIPRFCYHDRLSIAGNCRMCLVEVERSAKPIASCAMPVMKGMRVKTDSPLTRKAREGV
MEFLLVNHPLDCPICDQGGECDLQDQSMAFGSDRSRFTDNAFSGKRAVEDKDIGPLVKTI
MTRCIHCTRCIRFASEVAGVDDLGTSGRGSDMQVGTYVEKLFKSELSGNVIDLCPVGALT
SKPYAFTARPWETRKVESIDVLDAVGSNIVVSMRTNEVMRILPRLNEDVNEEWISDKTRF
AYDGLKRQRLTTPFVRNKDGVLEAADWESAFIRVAERVKACEGKAIAGIAGSLADAEALV
ALKDMLNRLGSENLFTEEMFPVTGSGTDFRSNYIMNTSIANIEESDLVLLVGTNPRLEAS
LVNARIRKTWVHSDLCVYMVGAPVDLSYDYEYLGDSFKVLEDIASGSHPLAKALEQAKKP
VIILGSAGLQRSDNGVIYNTVRRIAANATKHLEDKDWKVFNYLHQSASQVGALDLGYRPG
VGAVKDIQPRLVFLLGADAGAVQTSDLSSPATVVYI
>Cuni_T011376-R1  Name:"Similar to tlk2 Serine/threonine-protein kinase tousled-like 2 (Xenopus tropicalis)" Cuni1056:363209-404961(-)
MSCGSGRPPSWTVAAGSHSGSCLQVPHSGTQVVLGTVLTGAYPACSITCCFPGVMDNIHV
DPRKQELLEARFLGGRFQPLMVPAPPQEQQHDSSNLSSGGSADRDDGDGLGPTPDKCKLT
ERKRKRKTDNPTATKRVEANGKKINEYFRNQSPSRTGQPPGAVAKSPSPQAFGNFVPHSP
NNSSNSMADLMSSASRPALSLSIGTNVCSKSIQTDFSMAHIQALESQSMSHLEQKDTRID
ELHRQNDELKRQCTAQNKLLEKHKENLQKCLDVNKSLLIEKSTLEKKTTRQKCMENRLRL
GQFVTQRQGATFVENWVDGWAFQDLMKQQERITADKEDIDKQRRLLLKRKQPTALGKNAK
HDNFLKPGEKYLTLAEFYEQDEILKLRAAALKKEDADLQLEMEKLDRERNLHIRELKRIH
NEDSSRFKDHPTLNDRYLLLCLLGKGGFSEVHKGFDLKEQRYVACKIHQLNREWKEDKKA
NYIKHALREYNIHKSLDHPRIVKLFDVFEIDNNSFCTVLEYQKGNDLDFYLKQNKSIPEK
EARSIISQTVSALRYLNEIKPPVIHYDLKPGNILLGSGSVSGEIKITDFGLSKVMDESNF
HPEVGMDLTSQGAGTYWYLPPECFVVGKTPPKISSKVDVWSVGVIFYQCLYGKKPFGHNL
SQAAILEENTILKATEVEFASKPPVTQEAKNFIRRCLQYKKEMRPDVLQLAADDYLKPAQ
LKSKNMTDGTTYSSLVSLNTSSGGIGSSSSGILLSNNPGSATNNSHSAS
>Cuni_T011372-R1  Name:"Similar to HTR4 5-hydroxytryptamine receptor 4 (Homo sapiens)" Cuni1056:193259-194404(+)
MNSVGNVSAHDADDQAYNGGYSTALPAVDTTLNLSSIRCLEITRDMAGPPPQYDDLTRYI
ITTILVFVPILTIFGNGVVVIAVITHKKLQTITNAFVVSLAIADTCVALCVMPFSIYQQL
NNKVWLLGKILCKLSASVDVMMCTVSIFHLSCLAIDRYLAICRPFLHGRLTIRWVCVMLT
FCWVTPIFISFIPIFNDWNHIGIEDVIKCAFPADENVCTFVVNVPFAFICSLIAFYIPVV
FMIACNVRIYMAAIKQAHQIRTLEAAGNHNHYSHCRRKSKFKQEYKAAKTLGIIMGCFSV
CWFPFFIINVIDPLIGYYINYEPWQIALWLGYINSLMNPILYYYFNKNFYNAFRRLLSCK
VCKGVRDYDDDSLNTVTQMTD
>Cuni_T015152-R1  Name:"Protein of unknown function" Cuni1057:183993-194690(+)
MGCQTATIKHVLCAQSQSQRCYPLAPYVTFPKDGWSSGKGGLLLDTHILPDKLQRCSDDR
SWFWWSDAQFLPFNDACLFTTTSVYQPRLYRHWLPVSSIPSGRVLMYDLLSSGQMQCSIF
SRTSCSVFPNVNPHPLGKMVAYCGTGEVVVMSTSGDPVYSRSRDICNAVHVHCAIANNGV
SFACLKRGMGTFFLESYSLDSIMFCDDSIRCHTVCPGFVPSNNEPNIVVCKFSPDSTLLA
GSSNKGYLFVVKRYQLQKLSVVCPDMTSRQLSTAQAFDFCPCSPFQIITLGTSDRQILTV
NIDTGQVVVSTETEQNIDCVTFTPDGLFLAVGFHNFDIDIYDSFSLVCVHNIQMSALCQD
QLPRVQALAPTVLHLSFTQNGEHLASTSCDGHLRLWRIRRMFSLQEICRDKILTCIAIHR
IEELTNVPQKVKHFLQYKYF
>Cuni_T015153-R1  Name:"Similar to MRPL30 39S ribosomal protein L30, mitochondrial (Bos taurus)" Cuni1057:205628-215835(+)
MAASLTVGKLIPLLSALRLPQLLQVRNHRVALRPKRKRPIQKWFDPADKSWAEPILKYQQ
EKECRPPAEPSLLHMVYRIKDHYTRPYWEKDVLKEFGLFEKSYNPVVLKNTPEINEKLRS
VQHLIRIKPVTFPYGLPKDEEDYKHSYLRFNGEFVVRHRINDQSDEIAQAWSEVKLVEDN
PSEDIWKMDKETVQNETRRILQTYQLSSEYFKVKHVYKYNQDGKEFRYKGEHGVASTRQD
WY
>Cuni_T015149-R1  Name:"Similar to Ugdh UDP-glucose 6-dehydrogenase (Mus musculus)" Cuni1057:51415-54783(+)
PDLVTICPDAYSAADGSHALVICTEWDEFQNLDYQRIYHKMLKPAFIFDGRLLLNHQQLL
DIGFKVETIGKRLSRNHSKVVRTHANSSS
>Cuni_T015150-R1  Name:"Similar to nipblb Nipped-B-like protein B (Danio rerio)" Cuni1057:121084-144637(-)
NRAIPVTYNQPPPSMPNTNLPPPGMPLHPQFGTAMPHFDSYYPPTIPGQAPQVYGGNFPP
TFPPPFADPNPPPVTTQPHWEPSFHGRDRWELNRPDHVRSEPPRRDDDYDSRMFRERDRD
RERDWDREKDREWERGTERSRDRDREPERNRDRDRSREPERNRDRDRSRERDRSRDRSRD
RNRSKDKDRDRERNRDRDRERSKSKERDTSRNRDQERGRDTTRGRDRDDKHKSSRRKHRD
RDHDESDTESTRSSSKHKKSKRRKESKDEETPAPATTDEKARD
>Cuni_T015154-R1  Name:"Protein of unknown function" Cuni1057:226068-237964(-)
MASSVGKFVPWSGELSWVMWLQFHGFVVVVCLLQLTVLEGADADTIPTTDTVTSLPSNDT
AIQNITARPEGHTEEINTGTVVAVSIICILLCITIIVAVYFFRRKRQFRMMDKEKKMQIQ
MSSARNAGVYQDLTVSVPGDEKPAASPEHERLKAAEDV
>Cuni_T015155-R1  Name:"Similar to ORF50 Uncharacterized protein ORF50 (Ictalurid herpesvirus 1 (strain Auburn))" Cuni1057:260009-260629(-)
MPAASRSLSDTSNQSTTTPAASSSLSDTSNQSTTTSAASRSLSDTSNQSTTTPAASSSLS
DTSNQSTTMPAASSSLNDTSNQSTTTPAASNSLNDTSNQSTTTSAASRSLSDTSNQSTTT
SAASRSLSDTSNQSTTTSAASSSLNDTSNQSTTMPAASRSLSDTSNQSTTTPAASRSLSD
TSNQSTTTSAAFRVGHLLLFLSTHQV
>Cuni_T015147-R1  Name:"Similar to sgl UDP-glucose 6-dehydrogenase (Drosophila melanogaster)" Cuni1057:13239-28019(+)
MAVSKICCIGAGYVGGPSCAVIAHKCPDLRVTVVDQSAHRIAQWNSDILPIFEPNLDEIV
KSCRGQNLFFSTNIDQEILDADLIFICVNTPTKTFGLGKGRAADLKYIESCARRIADVAQ
SSKIVVEKSTVPVKAAQSISNILSANVKPGVRYQVTCNCDNICSCHLKVCCNFIVMQRC
>Cuni_T015151-R1  Name:"Similar to fip1l1 Pre-mRNA 3'-end-processing factor FIP1 (Danio rerio)" Cuni1057:154748-160127(-)
NAPRNLFKSGQNYQKGSTISPAKPMPAAKGLDIEAVGTINGTPVYEFDLTSISTDEMPWR
KPGADINDYFNYGFTEETWKAYCEKQKLLRSEAAGGTAVLPTPVTKIMSSPAPVTQK
>Cuni_T015148-R1  Name:"Similar to UGDH UDP-glucose 6-dehydrogenase (Gallus gallus)" Cuni1057:29484-41347(+)
VLSNPEFLAEGTAVSDLLKPDRVLIGGSPSAEGQEAVRALSWIYEHWVPASSIISMNTWS
SELSKLAANAFLAQRISSINAMSAICEATGADVDEVAHAVGTDSRIGPKFLKASVGFGGS
CFQKDVLNLVYLCECLNLPEVAAYWQQVIDINDYQRQRFTKRIVLGLFNTVTNKRVAILG
FAFKKDTGDTRESAAIYISKYLMEEGANVRIYDPKVSAKQII
>Cuni_T020391-R1  Name:"Protein of unknown function" Cuni1058:282135-365813(+)
SIPLAELKLLCLEQLEVMSKKRIRRILAGEESANISSSGTEDDTSDEEIHQPDDLAEHTI
KSEAEVEGHPADSTSVHQDSIRNTEERTEQERADLMEVKQEPPDSGDYGEGENEEELEEE
QPETYTSGSEDGELVRREDQSEDYTEAHVKQEPISEGEDHMEEQDEDAEMGNVEDIEGDL
MASMQAGSDEGVLPSIMMDQMELLELEMRARAIKAMLSSHGDVTSFDDDEYEVDDCDEDE
DVVEEISEADCHVDDNADVLDS
>Cuni_T020389-R1  Name:"Protein of unknown function" Cuni1058:80861-85387(-)
MKSSRRKQTNPNRVAAGTVDTSSVVVPLLGDTPVKEDEAVDEIVNDMEESRSPQPLLTRC
PSSDFELPLDMHVSTHTGSLCFDSFSRKSSPQEHEREFQGSLVKRPRLQAPGEDFPTAYH
RLGRQLLEIKNEPLANGNLGDELSSTQILDSASQEHEAEFHESLMKRQRLQASGEDFPTA
YHRLGRQLLEIKNETLANGHLGNEFSSAQLQDSTPSPKDMINSLSALLPASDKPEEQTVF
SELSQAPTPISLKLNKDINGESVSGKTDRIFHMDAYCDLCDREFCNKYFLKTHKANKHGI
YEDSSPPAGNLPLPYTGLMIPQDPLASFNFKMDSVKPPLSEPLLPWSFKLDSSSQAKKPE
DTASMKSAASSVNMFPVSCTSSTTSAEPSLKMCPIPLPQMESPKPAVSKSSIISSSSSGG
GMPRTSDIVSINTCNATTILTNITNSIKSEISSSGAPPANDSSMEDYCHICQKHFCNKYY
LRKHKQDVHGIAPENPPSNSNKRSRSGLLDLPMTSTNHMMLPQPLVSLAGMHSLPGMHGM
PIMSSISNMTNMHPGLMVINPYSLPPVAIIPAGSLMPGQQLAPPPHPMRSQSLGMNPMSE
PNILSNPPQTSVSSMNGHASTHSPKSSPNVYEGGVHCNICAKEFCNEFYLQIHKESKHGI
RKHNEEEPRDKAISLVKDKNTDNTSPQSVSHNARSESASMMPRSPFDRTPSAESNMFICN
FCNKDFSNKYLYRIHRIHDHGMNELIDPTLVENGELPHREHILNSMNESLRMATDACFAS
SFENPPSNKTQESVVCEICNKQLTNQYFLRLHKFHVHGVDPNANEKYNTKPDNSLLMSVC
RPKTPPTSGSFLNSSLSQQSLNLTSASGKQPLLSFLPPKMDFKDMPPYPDFSRDFKSFRD
MPPFLVDSLGSDLFRRSHNQVMHMDLNFFGLPSLGKLPMDDSVKLNFDPEAYCEICKKEF
CSKYFLRTHKQNIHGIKNDAIPSSNSKSSDGDKSSTLSPPKPNLNISNGKPLDSLDKNPW
RWKEPINSSRVICDICNKEVCNKYFLRTHKQKKHGIIPTSQSPNVSMNGSPIACDCDTAS
NTSSQADEKPFKMDPLILPQMIPLPPTERLSEKFNMKHLHFGNGNSNKEISLNNNTEQCE
TCNICNRMFKNLKWLKEHIMKDHSNNEALNMSSKKSSSLFTCKVCGVDFPAELSVQLHLI
QEHNARVTLDTEESQIPTEEANLPASEGNSTRVAELYGRWTLRKKVTNHQRLKKYVCNRC
GFDSHWLSSLLDHERNEHGFISDEAPSYCCKSCRHLFPSLNSLSAHLISIHELNIDEALH
EVKFAEPTFPNSYKCAHCPAVFPTRSWGMAHVRHVHIRSRKDLAVKNSFVKNVFRCSFCC
FKTHFAFRLQQHIKCRHTTSSRPVYPSSRILKPSSASNLNFHKSYDVSSPDDTSREDSTL
MSASSMYKSITVSLLSGPECDGVKTPTKALDTETLLLHNYKLPICSSPVDSASFKMALQT
SASAVVSL
>Cuni_T020390-R1  Name:"Protein of unknown function" Cuni1058:261013-266870(+)
MSAAKMVADSTQSELADALDGKKRKKKMKKTGKRVALPEDEDSDLDLKKDLKPISAYVKD
RPGMIEEMFRAVRGASLQRALPDLLK
>Cuni_T014789-R1  Name:"Similar to tmem205 Transmembrane protein 205 (Xenopus tropicalis)" Cuni1059:188972-193624(+)
MGSTSRVSRNFDALRIHHFQFFAMVVVICMASFLLYPSRRRTESPSILNAMMHLGSFGAN
FGAQLWVTLIAGLTMFYSLPRHMFGKVQSRLFPMFFLWSLVCSAITLSTFLIQHPLDTWD
RAHYIQGVSLSVCFLTAALNSLVVSPLIVSAMLKTFSMEVEAGVRDVIGYADMKELKQNP
QYFQSYRMFRRCHGASAMLVVSSLIANIVFLYFLTSLCMPL
>Cuni_T014792-R1  Name:"Similar to USPL1 SUMO-specific isopeptidase USPL1 (Homo sapiens)" Cuni1059:260407-277835(+)
MPVTGSVDQEIRTQESVEQTGSLEGDHAAERSSLSEHILDTSGAEVSSTTVDSDLVSETG
QAFTLPGDVSDHVQSTSTDGSSDFIDGSKDQTTAVDESASKESSNVGSANSARGFQDAFA
AFASASYQEIEGESSLDVCNNVSDTTASHPVNMPSADSLVSSAIDSGQVTTTGDPLVGSE
NDMEPTQPFNTDGDQLQTTPFPEPDTDSQPTHEAEQSDISDQTPHTHSDPQPAEAGSSSD
SVYFIQTTDASGQVVTSIIDPNDIPSYSNSVVYKQCMRSDGEIETTIVYSDGMAVNQEQQ
PEEQHPEQPAADSGEPDSPQEEPQIIYAHDANGHLTPIDSAQSFSEAAPPGKQFVYMQDS
SGRIIRTVMDANQTMVPGQQVYYTQSEDGRMITSVMDPASAGVTEEPSQGQQSQEAFDQM
YQQQQMDEAGVAAAMQQETSSTMVGSSNFDIDSSMSGLNMLAELSHLTSGQGLATEQITA
SSTDSNSMDQDDFRPIAMVTRQMAGDEGLESVSSEIADLKVGEADSDSRQEETLVTKFVS
EMKEEQLQSCTVSRDNLFVQWQNLDAMCWMDVVLIMLVNSPSLRLLVNLDPAHELASTLL
ITLLKANRQAQIILQNILKKSSGAEISSLQTGAGNSASIQDPKTSKLVCKENMDEIGRAI
NILYAMREKIWQALQPRLRCERGKHNSPVLVLPLLVREKPVIKQMFTMNYRYVFKCKQCG
YTQDDSHTKILPSIPAVPEDFTMQSPCFVRNCFECQAPNQRMLMKFELLHDFVQMHFVKG
LPHSRFDELSFDFNDDHYEVTAVVHYKNNPDHFIAWVRNAPGPAWMECDDLKSVITCYSN
VSPNIPPSQVHMVMWERRLTPQHTLVMRDTEDTKLLASLVLTVQQPSSLQSSTQQSAEQ
>Cuni_T014788-R1  Name:"Protein of unknown function" Cuni1059:94203-101415(-)
MSCGAVIGLVFLVITNLAVIIAFVTPYWVEFRAHRNQGLLAYCQSDSCTWVFEDQYRSLS
SFDVTSEWWIATIALVSFGFVLCIKALLLATIALCCDCRGCNASHAIGGILLLAFLSLGV
AATVFGVCANKYHDVDVEMTSLIGRRFGWSFWLNTGAAGAALITSFIYVILGRSKSA
>Cuni_T014791-R1  Name:"Similar to BYSL Bystin (Bos taurus)" Cuni1059:230457-247227(+)
MGKVKTQRKRLHEQISDEQHAQPSSRVRKEKKRTEEDVFVDEKLSKKILAQARRQGEDLE
REHDGIEHGSRKKTPKGRPLPQKHIKLGGATAADSDSDDEEASKHLFDNFSNLEKTVMEI
NDEDEYDLRKFMNPNPAQRRTLADIISEKLAEKKTAMTEMMSDAPVEEEIDETVREHFIK
IGEVLSHYRSGKLPKGFKAIPSFPNWQQLVELTRPENWTAASIYAATRIFVSNLPKYHFK
DFCSLILLPRLRDDIIEYKRLNFHLFQALHKGIYKPGDFYEGIVLPLCEAGDCTLREATI
VAGVVAQSSIPVGYSAAALILISRMDYNGANSIFMRAIINKKYSLPLSAIDAVVEHFMRF
IDKREQMPVLWFQCLLSLVQRYKHDLTKQQKSQLLKLISAHEHHDICPEIRREITQSKRS
RGDPEVDDENMAV
>Cuni_T014790-R1  Name:"Similar to rpl-7 60S ribosomal protein L7 (Caenorhabditis elegans)" Cuni1059:209886-219921(-)
MIFRHARKWLNNFFSDIKLPRVPESVLKKRKQTAAGRSKAVKADTANRKKQAAAKKRTFF
KRAEKFVKEYRAKERDAIRLARLAKRNVNVNVPAESGLVFVIRIRGVIGIHQRPRKVLQL
FKLRQINTGIFLKLNKATLSMLKIAEPYLTWGVPSLKTVREVIYKRGYGKVDRKKVPLTD
NSVIEKELGDKDIICMEDLIHEIMTLGPNFKYATNFLMPFKMSPPLCGWRRKYRHFKDGG
SFGDRGTAIDALVKQMI
>Cuni_T014794-R1  Name:"Similar to Adk2 Adenylate kinase (Drosophila simulans)" Cuni1059:306806-320938(-)
MPVPVQSYHHSDGINAVLLGPPGSGKGTQAPLLAEKYCVCHLSTGDMLRAVIASGSELGQ
RIKGVVDSGQLVSDELVLELVNDNLNKPECKNGFLLDGFPRTLVQAEKLDELLDKRKSPL
DVVVEFVIDDSLLLRRITGRLFHIKSGRSYHEEFNPPKKPMTDDITGENLVRRQDDNAEA
LKKRLEAYHKQTKPLVDYYAKQGLHAAVDASQPPKVVFAAIQSIFSAATSKDQVMFIRN
>Cuni_T014793-R1  Name:"Protein of unknown function" Cuni1059:284731-286980(+)
MDSAQLQLKKQEELNETIVSVDESQVSAAERYRMPVELFQPDEESPEKSFKLDDTASKLT
VDLPSKLFQESVTSADGVSKSPHHQSRDTGYQAALKEPRWSKGRIKVPPDFAPGIDEHET
SMEVDLLTNEDSTSALLEANRSGVGIRDSTNDTAKSSALRLLDESVTEAQRVTEEEQSGT
EVPPVKTRRSRGRPKGSTGKRGRKKFHSVSTPRVSTPRVSESAEAMIDVSARAVEPVVSP
ETSSDITITHPEMQSLQHSPRSSPAKHLKPSSADVSFASDLVLKFDDDDYEEKDTVEEDD
KNLVCGAETVQENTAVLFQKRPEQSPQREKIMVIKCSVSGPAFVRHKTEKVSWDGNSCTG
TVSRFNYRVLSGKPVTSQSRHLSLGPREECFTSVPPPYSVRRSEISDKPQTLPAVVVRRQ
QKPLEKPKSDPSKVPTVVPLVMEDNCDPSCIGGSVVTSPDGGEVFAGTVLKQRVEMVDWN
TSSDKEEVLENLTGEELRLAQRQYLRHLMTGLYIQAGDFSSLDDDNNDDFQDVEKEVKDE
EKEEEVTVEKNGEELAEGLENSTEEKVCDQVGKVDLSVTLDDEELLKKSFSKDRQKRKHS
LELASPGQVTKKSRSSQDEQSNSLLQSPSNSALCSDLESADTPITAVSSRINGTDTASSL
SHSCQTAEPEPGAQPKEAPTQQRFNSPSRRSSRTPIPSKKVLDAWDDFPARSALKDKRTL
SLSSDDELSGYSSGDVQRKKLKTKQFSAS
>Cuni_T004047-R1  Name:"Similar to Fat3 Protocadherin Fat 3 (Mus musculus)" Cuni106:326887-344673(+)
PCSKVICYNGGKCVASGTVGVCQCPQGYVGTWCETKQDPCSKVICYNGGKCLTSGTVGVC
QCPQGYVGTWCETKHDPCTKVNCHNGGKCVASGTVGVCQCPQGYVGTWCETRQGHNCAIG
LKAEINGVH
>Cuni_T004061-R1  Name:"Similar to NPR1 Atrial natriuretic peptide receptor 1 (Homo sapiens)" Cuni106:981541-986157(-)
MLKTYSLLPWIIMIICIINIVCGDVSSSPSSSSPPDRGNSACEPSAVKRHLENKIRIGVI
LPFSGDYPYRIQLTRPAVEYARDYILQKTNLLQNYSIEFDYRDSKCSDVTAPLEAIDMYI
KKSVDLFLGPACEYAIAVVARFTRTWGIPLISAGAQPMAFADKNIYGLLTRMVSTVSYDK
FAKVFTSILTHYGYKNVGMLYQSNENPSDGKSECWFIMEAVFTEVQKVLNPQVDKQHVEE
FFESNNSRSEFTKRLKNLSATTRGKPCFMYL
>Cuni_T004051-R1  Name:"Similar to fd96Cb Fork head domain-containing protein FD5 (Drosophila melanogaster)" Cuni106:434948-451073(-)
MQSPHFDVSSYHGAVYGSAPVYETSGFRLHHSSYTADSDSTCYAGYTSPGVHAVQNYGCR
DPGAYTEAASFYYASGGAASFDNSNSYKIQNGQMGVSECENVAATNVQEDNFLLKPHESL
ALNHLQSAYSNNSIHNSNNNNNCINIHEAQIHQAHNYQLSTNHHHKQHRSYDIPDNIVVS
RLTPNVSDIFGQRTLKLESLKREHSPLDEQQNTPPASTSTAISINIEQGNKQYATSDKMN
STRSDISEVTLSKCSSETFLGKDTISEKKEEESGDNKPTMSYIALIAKAILESEHKRLNL
GSIYNWIETHYPFYKNKGQGWRNSVRHNLSLNDCFIKAGRCEDGKGNYWAIHPANIQDFM
RGDFRQRRRSRRRGRKKDCDVSMYPGSNGYLQSHGSSLTPGVTFNQAALSSIYSPYTEAE
RRAYRLDEALLRQSVSNPFVKWYQQGVSTPGYGVPASPHSCSAGIYANSGALQWPQTYSD
TSSQSMYPTLSSSFSR
>Cuni_T004041-R1  Name:"Protein of unknown function" Cuni106:132482-136662(+)
NILICGGILCESDHQCPGFQKCCPACGSKLCSYPIFKCGDSECKPAINAFLPLTDVFMER
SSLK
>Cuni_T004043-R1  Name:"Similar to EGF1 Fibropellin-1 (Strongylocentrotus purpuratus)" Cuni106:225442-263756(+)
MAPAACCFGFLVLIITVSIVSAHPRTNQQNSMANPGLNPCRSLKCLNGGYCDTLYTGIAH
CVCRPGYSGQRCEILNNVGRSPCDNFLCQNRGRCLINRSNVPYCDCPTGYSGQLCEIVDR
QQPNVDTMSCNNSCSTATSCRVCMPCETCQLETICLAYEILVKDLDAECHAQGYLESLLV
RAPAHPLGYSQMKCRGTGPIRECPLGSTCVDDRRGGATCCRKRVGLDNIEHKPGTCPVAP
NTQTCGRLSCQGDIDCAGDLKCCQFCGNRCTKPVDPVDRENRPCENFACSNGGQCLLRGT
EPYCECPAGFTGPRCDSRQDPCASFTCSNGGRCLFQGSQTYCQCAVGFTGPTCDVILDPC
QTVRCANGRCLSRGTDPYCECTQGFTGQLCDTRIDPCQNVPCINGRCLIRGTDPYCECQQ
GFTGQYCDTRLDPCQNIQCINGRCLSRGTVPYCECQQGFTGQLCETILDPCQNVRCANGR
CLSRGTIPYCECQQGFTGQLCDTRIDPCQNVRCANGRCLFRGTDPYCECQQGFTGQLCDT
RIDPCLNVRCINGRCLSRGTDPYCECQQGFTGQYCDTRIDPCQTVRCANGRCLSQGTVPY
CECQQGFTGQLCDTRMDPCQTVRCINGRCLSRGTDPYCECQQGFTGQFCDARIDPCQTVR
CANGRCLSRGTVPYCECQQGFTGQLCDTRIDPCQNVRCINGQCLSRGTDPYCECQQGFTG
QFCDTRIDPCQNVRCINGQCLSRGTVPYCECQQGFTGQFCDTRIDPCQNVRCINGRCLSR
GTDPYCECQQGFTGQFCDTRIGI
>Cuni_T004046-R1  Name:"Similar to VCAN Versican core protein (Gallus gallus)" Cuni106:313989-320410(+)
PCKNVICYNGGKCVASGTVGVCQCPQGYVGTWCETKQDPCKNYYCYNGGRCVTKANLAVC
ECPYGYVGTWCETKQ
>Cuni_T004057-R1  Name:"Similar to Rpl12 60S ribosomal protein L12 (Rattus norvegicus)" Cuni106:655272-655725(+)
SEVGGEVPATLSLAAKIGPLGLSPKKVGDDIQKGTADWKGLKITVKLVVQNRQAKVEVVP
SAAAMIIRALKEPARDRKKVKHVKHNGNITIDDIIRIARQMRSRSMAKALVGTVKEVLGT
AQSIGCTIDKLTPHTVIEKINEGEIEIPEE
>Cuni_T004054-R1  Name:"Similar to ITIH1 Inter-alpha-trypsin inhibitor heavy chain H1 (Homo sapiens)" Cuni106:522621-531196(-)
NKQSVNFENSPELVVNVSGIEEPLCFNVGTREETVRVLQDPKTGIIVNAQILHDNLNNKT
YIGTVLISQGNICLLGTQYFLLVNNAKFNWGEIRDLSVDGHRILIRGNIVIVTFRQCRIT
LAVRRHATGENSMDYSEFGRENDNKAEESNASKDDDSDGAGTKGRPDILPLVGYEQRESF
INHFLSSKRRRGLLLQKYFGINQDSAVVRNVLIEVDSEGRKKRGNEKEDSEKILKDGSKV
DQAGEESENQHGHENMPDVQSSADQDGERLNGFKPLDDYAEGQPDESNDGSRMEREAEKR
RDSNIVLDIYIADSRDFSNKTHGLLGQFLFKNVTREKIRYKDGKATARLLLQENPVLRTN
ALFTSRFYDAINGTRKCWKLRQNGREVIDGNYTDYAVPSISYRNLKELPPPAPL
>Cuni_T004055-R1  Name:"Similar to LHFPL3 LHFPL tetraspan subfamily member 3 protein (Homo sapiens)" Cuni106:568849-578636(-)
MDPKFNPEVLKIYYFRYMREYRAVAVLWGLLTIVWCILNVVCFIQPQWIGDTEDSDGFGH
AGVYAHCFPEEPQFHRYVCNGTFGDFNQILNDPFRASTFFCGVAALLMLICVAALLLFFC
FKKTAVFVFCGILELITAVFLFLACVIYPAGWNDTEILKICGPKAGQYTLGECGIRWAYI
LAILGIFDTGLLATLAFFLASKRARIEIYSTDDTIAKSEINAYSETLSKKSMPIQPQLMV
VPGQGDIDGYSDNYSRISGKPMSRNGFQL
>Cuni_T004062-R1  Name:"Similar to NPR3 Atrial natriuretic peptide receptor 3 (Bos taurus)" Cuni106:1206816-1211032(-)
MGFSHIWKSHTWPKLVILTICAFCFTDMSMASEIGSRQDKKPINVLLLLPTDTKYMFTHA
LMFPALEIAMEKLESNDSLLRDYYLNVSYEDTMCHEAMGMKYAIEYYFVKLVDVFFGPIC
DYTVAPLLRQATFWNLPMVTVGANAWGFTKFRRTVFPMLTRVGPVNHYSLVNFFLEYVGR
YNWTKVRLVSTLYL
>Cuni_T004045-R1  Name:"Similar to Sned1 Sushi, nidogen and EGF-like domain-containing protein 1 (Rattus norvegicus)" Cuni106:303106-309805(+)
LCKSINCYNGGRCVAKANAAACECPQGYAGTWCETKQDPCKNVICYNGGRCAASGTVGVC
QCPQGYVGTWCETKQDPCSKVICYNGGKCVASGTVGVCQCPQGYVGTWCETKQ
>Cuni_T004042-R1  Name:"Similar to EGF1 Fibropellin-1 (Strongylocentrotus purpuratus)" Cuni106:194342-211145(+)
REQNGCNNVICQNGGRCVVSGYSASCQCPNGFSGSRCEQRAITRDPCASFVCQNGGRCTA
PADAPYCECPRGYTGRNCETIQDPCQNMRCLNGARCLTQGTQAFCQCTRGYTGQYCDTRE
DPCRDFGCLNGGRCVIQGGQPSCECPRDYRGPRCGIRDDPCLSFRCENGGRCVTRGDEPV
CQCREGYRGPRCGVRDRDVVQNPCQSLSCQNGGRCVSQGTSAYCQCPRGYTGSSCESRGA
LTVRPPTQCQGYGCNNSNDRCGGCPAGWTCQYISTGCPTLNCSTTPTYRCVSQKKK
>Cuni_T004053-R1  Name:"Similar to LHFPL3 LHFPL tetraspan subfamily member 3 protein (Homo sapiens)" Cuni106:487914-500706(+)
MKNETEYNTELTKIRHTNYVRNSRAIVVLWAIFSCIFLILNIVVFAQPQWIGDTGDSAVP
GFFGVWEYCSESSTENQFICSGDFLQWSSFPNNYFRATAIMVGVSCIMFMLVILSFILFC
LLNTGTVLQICAWFQILSGLLMLVSCIIYPGGWDHSVVQTVCGLQSGHYNIGVCGMRWAY
ALAIVLVCDAFILAVLAFVLAAKQANLLPDAYKKKPEKVIEKEKVKLASSHKDGVTPSEM
YGDYYNTVHSTSGYSTGRKYNHGYVED
>Cuni_T004058-R1  Name:"Similar to ADRA2A Alpha-2A adrenergic receptor (Sus scrofa)" Cuni106:681942-682276(-)
KNKSLTQNSREARRTNREMRVFVTLTYIIIGYLVCWVPFHFVFDLTAFDPELVPNVVYDI
TFWLTYVNSTINPFLYNFCSPDFKRAFRKIICRTKSTPKGTSLGLLAPSV
>Cuni_T004056-R1  Name:"Similar to Orc5 Origin recognition complex subunit 5 (Mus musculus)" Cuni106:615205-633506(+)
MAETSEVDEDSSLNSKVLCRQQQIKTLLSLFGQRQAMTTGSLFIYGHTGTGKSLVLQSVL
NHNKLPYIFLNSIECSSPRFLFEHILNNLPVQGSYQISQDLNNLLNIENGDDDDDYIQCD
NLTDFIRLLVSFISESPLKNQTLYLVLDKAERLRESSASLLPVLLRLQELSGLNVCTIFV
SEIVWEKFRSGTGFYEPYCLHFPDYSRQELMEIMCLDAPASCEKDLYSLYINIVLSVFHM
VCRDLRELRHIARLNYQYFIEPIEKNEVKPSDTKKLWRNIEPHLKKALTSVYLREVSSRQ
WELLQQAELADPDSDFSKAIVPSRSYVELPYYSKFLLIAAYIASYNPMKYDRRFFAKFSA
KVSKRAKHVKKSERTSNHLLGPKVFPIDRMMAIFYSIVEGKVVPSAYINVQISSLVSLHL
LHQIGGEDKIAAPKYKCLVTLDFIRSVARTVHFDVMRYLYDFL
>Cuni_T004052-R1  Name:"Similar to SEC13 Protein SEC13 homolog (Homo sapiens)" Cuni106:462285-477348(-)
MVSVINSIDTAHEDMIHDAQLDYYGTKLATCSSDRCIKLFDVTGGQQTLITQLRGHEGPV
WQLSWAHPTFGNMLASCGYDRKVIIWKETNGTWGKLYEYPHHDSSVNSVSFAPHQYGLML
ACGSSDGSISIISSTGDGTWDTKKINNAHTIGCNAVSWAPATPPNALFDAQSGQQQTLKK
LVSGGCDFLVKIWIEDNGQWIEDQKLEGHSDWVRDVAWAPSTGLPKSVIASCSQDCRVII
WTNDGVSNTWNSKTLHKFEDVVWHLSWNTSGNILAVSGGDNKVTLWKENLEGQWVCISEV
NKGQGQISDKPASG
>Cuni_T004048-R1  Name:"Similar to EGF1 Fibropellin-1 (Strongylocentrotus purpuratus)" Cuni106:345133-364871(+)
PCSNVICYNGGKCVASGTVGVCQCPQGYVGTWCENKQDPCSNVICYNGGKCVASGTVGVC
QCPQGYVGTWCETKQDPCSNVICYNGGKCVASGTVGVCQCPQGYVGTWCETKQDPCKNTI
CYNNGRCVAHGNTAVCECFQGYVGTWCETKQDPCKNLVCYNGGRCVARNNVAVCECPQGY
VGTWCETKQDPCKNIMCYNGGRCASRNNVAVCECLHGYSGTWCETKLGKCDNGGRCLAMG
DRPYCECLQAYTGVRCETRTVDRCPAGSHSCEDDQKLRCVPDLCKSCLAGEKCKVVFDDR
YCGSDINCDQYV
>Cuni_T004050-R1  Name:"Protein of unknown function" Cuni106:377958-385551(+)
MFRLYFLCFISFVLANEGVTIVRHYGDLLVTTCPVGGENLTYTVDFPKTNVISKTQSNVT
SPDIDEKSEAAESSAEDSEKNDTTQSTGGADSSAKEESEETLDRKAGKERTEDRDNSDAP
KKNDDSDIPDKDDVAEKPVDSESKDESSPDSSASSEESEKASGQDSTASKDDAKEEKYQG
EDKQVENTEENSDVVVVEDDPEDNEPEDAPAADDKTQGSKSVAEDTSEEDRDEKEVKSET
EDAADDKETTETDQTEDVKENPDTEDAADDQEKSENEDDEVKPGTRDDKIKTETSETVDD
KKTRENEETADDNEQSDNKDIADDKARSETEETGDNKGEFETDETSDDKEKSETDDKGES
ETEKEQNASKSVSQDEQQKEQNAQSEGKTTEELSEEETNDTNEGSEEDKDSNIQKDSGNI
DSEGVTKDEDQTNRGDTRRPADDEKNTGDADAVEESEENEATSKTEGDKDNSDAARDREE
NNSEDQDSEDDPEESEEDED
>Cuni_T004044-R1  Name:"Similar to Slit3 Slit homolog 3 protein (Mus musculus)" Cuni106:271497-273466(+)
DTRCNNGGRCLSQGTQARCECPQGFSGLYCDTDTRQADPCLNYRCSNGGQCYIQGVQPYC
QCPRGYMGPRCENTS
>Cuni_T004049-R1  Name:"Protein of unknown function" Cuni106:372152-372321(+)
QCPLVSSSYSLDYIYCSFISHEHKCITNKDCNGDNEKCCPNSCGSTVCKKVYSLK
>Cuni_T004040-R1  Name:"Protein of unknown function" Cuni106:91112-106193(+)
VHAQAKSQPPLGCEVILCPLDTVCRDVAACATCPKEAQCVPISKVDTRIDNKCQQLNYTQ
AILLDKKTCYRQIDCTEVSPQCPQGAACVETYNGKGICCRDQTSSTNQPAFRKEKLGVCP
ENILNCGRTLCESDRRCPGAQKCCPACGSKLCSEPVIKCGDGVCKPGEICVQKPYPCTPG
MVCIQIVIGVCVPAGCGKCEYNEDCRETPTGYECIPPVN
>Cuni_T004060-R1  Name:"Similar to NPR1 Atrial natriuretic peptide receptor 1 (Homo sapiens)" Cuni106:815908-901381(-)
KNSSERPWYNASDTEERNEKAKKAYEALMTVTLRKPTNKTYMDFSRDVKERAKNLYANFT
YGEDEVNSFVGAFHDAVILYAIALNETLAANISITNGSEITKRMWNRTFTGITGTVSIDE
NGDRNADYSLLDMDPKTSKFRVVANYFGNIKEYEPVEAIHWAGGRKDPPPDTPECGFDGS
KCPPDEPFPLYVIVIIVLGSVIILVLIISFFVYRHIRLEAELAEMNWRVRWDDILFGSPS
KNKKLERQGSRMSLNRGSYNSSCSGDTIAAHLQDGARQLYTKTGYYKGAIVAIKTIEKTN
ITIQKPLLLEIKRIKDLQNDHIVRFVGACIDPPHQCIITEYCPKGSLQDVLENEEIKLDW
MFRYSVMQDIVRGMAYLHGSEVRTHGNLKSTNCVVDSRFVVKITDFGLHYLRRSEEMQED
ETSFAHYQRMLWTAPELLRMANRPREGTPKGDVYSFAIICQEIVYRKGVFHLHNLDLSPQ
EIIDKVKNAIKPYFRPTLETFDCPTDELAYVIRKCWAEDPNERPDFQMLKGQIRKLNREG
DKGNILDNLLSRMEQYANNLEALVSERTQDYLEEKRKAEDLLYNMLPRSVASQLIKGESV
HAETYEQVTIYFSDICGFTALSAESTAMQVVDLLNDLYTAFDTVVSRFDVYKVETIGDAY
MVVSGLPVRNGNLHAREIARMSLALLKETHTIKVRHRPDYQLKLRIGIHSGPVCAGVVGL
KMPRYCLFGDTVNTSSRMESNGEPLKIHVSPQTKAILDSFGTFKLELRGDVEMKGKGTVT
TYWLLGEEPSANVQMSSHGIL
>Cuni_T004039-R1  Name:"Protein of unknown function" Cuni106:64355-79750(+)
KKRTCSGIRCKTNSDCGVNEKCQVSPCGPRICTAEQTLTCANMLCNINTTCRDVTTCNTC
PMEPRCIPVGQIYDGIDNECRRLSYTEVVLVEKPSNKSTYKQLICCQSCPSGATCAGGLC
CRGKVSVPLTKSGLCPTNQVAGSECKGTGCSNDYDCPGEQKCCSLCRKVCTDPIFVLNKD
LCSGTQCQKGEVCALRTQFCPKGRACPQALLAVCVPYQCANCTLDEQCISIAKGYSCSRT
DLCGGCPSGSVCRPTGIQCVTVPCPQYSCVPIDRCGGCRQGQVCKRNTCSTKLCASYKCY
PSSP
>Cuni_T004059-R1  Name:"Similar to mAChR-A Muscarinic acetylcholine receptor DM1 (Drosophila melanogaster)" Cuni106:710528-720843(-)
RMLGYWPFGSFLCATWILLDYGMTFASVFTIVAISSDRFWSVFWSLSYRTVNKKKKSMVM
LAIVWLLTCVLWIPPLVLDRVNNHQSPDECRWDPAHNRHFVYIIAIVGHHGPCFLMLFFY
FFVFFYLRKRVKFGLMKVSECY
>Cuni_T011306-R1  Name:"Similar to PARD3 Partitioning defective 3 homolog (Homo sapiens)" Cuni1060:90299-151472(+)
MKVIVCFDNVRVTVPCGDGTIPVRELINKAVHRYTRAVGKGSNHWVEVTSLKTISGGGIL
DPDDQLVDVVDDKEQLIADFEEHDRPSVQHNGGDGASASSTGTTSPDMFQASNGANVPLH
DLTNKPIGIHIDLANTSRALGLIRPSENSTGSNNVVTDVVVTSRDLTLGSNLRVRRGSEP
NLNLLSSKSPPEKDEISSGDPRPFIPRRESVRESDEPRSESSDDDKKIKVTMHGSLDRKK
ASHSRFTRDALRTSLSNRPEMYHWLEAQENLEQLHKKIKVQERMGPVEGHDGEDVSDSFQ
TDGCLVCLQNDGGPLGIHAVPAFDEHGKEMGLLIQSIEPDRPVDKDGRIKPNDTIVEING
NSLKNVPFLSAQNIFRAAMDTKEIRLRIVKGSANSTSSLSHLKGKQKPAPLPPAILPKPR
SHAPARPSPLTLPAPESKGKATIPTPAPRDASKKTVDSSENSENSNGSDHMNPDINSSVK
VKPESLLVYKNVSPSPSANIIKPGPPIKAPKKVPPAIPARNPGTSLTTHLPEPPLNAVTN
TRRIGKKLVVQLRKGPLGLGFSVTSRDNQTDGNCPIYIRNILPKGAAVQSGQLRPGDRLL
EVNGVHMTGKTQAEAVSFLRMLPEGSLVELVLSRQEEVDEKFRIPRKLGDDTLPENEDEN
DIIDESDGAGQPNVSPLQPSQGHEVDTPALGASNEKLTLHIPLNDTGSAGLGVSVKGKTE
SSDSGIRDLGIFVKTVLKGGAAYKDGRLQVNDQLLEVNGVKLEGLSNTSAMEALRVAMME
EGQVPGVIKLTVARRTGSEPFPLFSGDSPDNSQMDIVPSAVHKRASSASNVSAIVHQRSS
SASEVASLSQHKFGNSKDMPSPIPPMRSSRVAALREHFSDSGGGLRNESYMKAAHESFHE
LSSFINIMPSPLSKSKSQMEAKSLDSKNIWINESDTYTLPNKPQRPHSTIGFLHGHHNSH
SSASDDEAFVRASVGSNKDENDLSPHGDLILPFEREGFGRQSMSEKRKGHLDPRSTEIYK
LVKGNKENKGRFLGRRVQSFHVTGSSDAIAAKVPLPAPSHTDAMSPYKQFMTSSTNSMMH
VSNDSAYQSNQVSTDMPVSNMKRASSLENIVNVVEAPSDHTHDLSPMWKSNRFGRARGCN
ESFRAAVDRSYDALDPALMDTLEEESAESGAFTFDPSHSSHSSVSSEATNEDMNSLKRIK
AKEKEKKGLFKGFLRFGKGRKSDEEAMRRSRSEERPEDRVVDRRTDYSSERPVKDWWAAQ
PYGDTQKKWMVAADEQNQQQRGRKSSQQEQERIEEEYARLRDYHVGIQRLRSQSVDPSSG
RNAAVVVSHERSSPFQPYPGSSAQWQHQLAQQQMDRSDPRSYHPAAMTRASQVTNHDYAG
KNQSYSNSGGELDGKGSISKTAMSRAEYIQQLRSQYQQRHRQRQGVYPLDDREEQYEMWN
HISSQYEPHIRDPEISRFYDRPSSRQSDQKLPEKYGSSFIPLNTNNSTSYYPGSHSLQHQ
KQHQHRYEPGNQSHPGSRPQSRTGPAATDVTLPYNQTLSSSYTDQIQQHHKQHHHPQQVQ
EFASKHFQDQYSSSDTNVPVDYHVYEPQPQHFYTNPAQMYHSTRSQYSHHRGGSYADSTS
TKV
>Cuni_T011308-R1  Name:"Similar to ABRAXAS1 BRCA1-A complex subunit Abraxas 1 (Homo sapiens)" Cuni1060:203184-217938(-)
MSVCLDGSTLSSLLFSHLNGANQYGFLLGEKIEHIEDKISDSQIHTYDINSYLYVSSFIP
WPSQHCIYNRGGIIDNERMQSFLSSKEQNIIGWYSFRHNSTSRPSLRETNLHNNLAVTSS
FTGQSEDFIFLLCTSSSSADMSIHTCSYGFMQKTDGTFLNLPLTVMNLGDTTRKEYRKKS
STTLFQSQTISGVLQSSQKEFMKSSGEMEHIVKVNHLEQSLNKSLMDAHNKITESEKTLG
SLEMDVAGLRQQLLLLEQEEAEIMFHKQEEKRQCELEEQRRHNAQVDAEEQKELEKLLID
LGVSSNDVLCNIQPESLTVESSTGDHGSASAHIVNKALSVPKERAFVKNNDTNANRVADS
RSDVDHRRYMNYEQEQCTNSDDVYAHKPRHTRTVKDNLVDTFSFVEDELKFHQSTAAKKQ
QSCAVRNAGATVAQDQGSGKGLIISSHENTQYKDIKYTGVKPIQTTHNNLLHQDTGDNTY
GVPISDALGDLVDLERPQLDPDVCVDRHATSSPVF
>Cuni_T011309-R1  Name:"Similar to Hex-t2 Hexokinase type 2 (Drosophila melanogaster)" Cuni1060:225419-274908(+)
MAFHMLERPCPHKPKPVFMTPIDKSAVETILRPLDLTDDHYRRLMDLMTEDIVKGMNPQT
HPAANIKCFPTFVRSVPDGTEQGDFLALDLGGTNFRVLLINLNGQEVKMESKIFIIPQHI
MLGSGVQLFDHIADCIFKFITDHKLQGKKLPLGFTFSFPCRQEGLDKAVLTVWTKGFNCE
GVVGKDVVELLHAAFKRRGDMPNVKCLAVINDTVGALISCAHSDRQCAIGLILGTGTNAC
YIEDLQNVKTWTGDDGEPRQVLINCEWGAFGNDGNLSFIQTDFDKAIDKHSINPGKQIYE
KMISGMYMGEIARLAIERLRKNHLLFEGEGSYHLATRGRFYTKYVSEIEGDDVTNFTVTR
QIFDELELTNHNEQDYRLVRHVCNLVSKRAAYLASAGIACLLNKMNKKEVTVGVDGSLYR
FHPFFHDLMMEKIQALIRPNIRFKLMLSHDGSGKGAALVAAVASKLKDKDDRGRRGSKV
>Cuni_T011305-R1  Name:"Similar to PKM Pyruvate kinase PKM (Gallus gallus)" Cuni1060:35568-69684(-)
MAQMLAQPGPSGRKPIFRKEALEEVEKSGVRSSFGKLQLPVGQQFKSFLCDSFIQHNTLL
SIDSSPASFRLTHIVCTIGPASREVDVLVKLMKAGMNICRLNFSHGTYDYHAGTVRNIRE
AARQLPNGAVIAIALDTKGPEIRTGLLLGGPSAEVTLQTGNRILVTTDDQYAEKCSADIL
WVDYKRITHVLGVGSIIYVDDGLIALKVTHKENDRLECTILNGGQLGSKKGCNLPGTQVD
LPVVSGKDKQDLLFGLDQGVDMVFASFIQDGAGIREMRQILGDRGKHIKIIAKIESFSGI
YNFNEILKECDGAMVARGDMGIEIPPEKVFVAQKLMISSCNVAGKPVICATQMLESMTYK
PRATRAESNDVANAVLDGADCVMLSGESAKGLYPVEAVSHMAAVCLEAESVLYSQRTFEE
LKRFTPVYADSEHTIALAAVGASYQCMATAMLCVSMTGRTGALLSAYRPRCPIIMVTRSE
TAAKQSLLYRAIIPFLFSGPSKPSWAEEVNAYLTAGLDFGVRNRIIKYNDQIVLVMGTEQ
GPDTTNCIQVLTNKLGESFV
>Cuni_T011307-R1  Name:"Similar to DBI Acyl-CoA-binding protein (Sus scrofa)" Cuni1060:172627-184956(-)
MASLQEQFNTAADLVKKLAKKPTDDEKLSVYGLPQGVLDVRGKAKWDAWNSLKGKSKEDA
MSEYIVKVEELRNKYN
>Cuni_T011310-R1  Name:"Similar to RNF126 E3 ubiquitin-protein ligase RNF126 (Bos taurus)" Cuni1060:293672-315333(-)
MAEATLVERPPVFFCHECNVEVQPNIPAFTCSRCNSGFIEEMEEPALPAQPTTGSHDQDS
IIDFAEVSRIINYVVQQVGNNLGRTPLILRGNPADYAWGPNGLDAIISQLLNHLEGTGAP
PAQKDKIENLPRVIIEQSHVDNTQQCSICMDDFELAMEVRKLPCDHLYHSECIIKWLEMH
GTCPVCRKDLNGEDTSANEAEFSPSFHSGADGASTPTSSSSSSTTSMESTPSSSFSDLCR
N
>Cuni_T009196-R1  Name:"Protein of unknown function" Cuni1061:105694-116827(+)
DGWEVRLTTSYVPRYMYERVPICCPGERNCDHGRQIITSPAGENPATCANGGQMIYRDGQ
QRCECAPGYQGIWCNFRALPGDSQSQSGFPSGPLIRVLSAPAPYKNMVKEADMWRSKARQ
FPASPMLPVREHPAGAASPWAYPTAAMMQHQMMHAKMAQMEEMYRQSHGDFRNQIPPQSV
APLDARRTMAGNPNSVINSGANGRFLSASSANKNPYSKITSQ
>Cuni_T009200-R1  Name:"Protein of unknown function" Cuni1061:303346-312271(-)
MATERFKNDKRLQVLALFALYYVLLNQLQSANAEIQHGGTCNSTDSGNVCKPPLVCKLEF
NVCLCPVTQYYDSRTQKCESENNLKRKNIKCRGETDSVICSLSQDDSILNTYVSVNSSSQ
VIPFSQGQAEIKHLSPGTYYVATITSKFVIEFYNKIITSTVAVWTKPDKPGNISSVRKTK
VQETSLESYWYDITFEASRGNVSYYIFMIKNTKEYTNSFETKKTTISNVLLKPGTTYFFS
ITAYNGNNTSSDVTEGSFKTNAE
>Cuni_T009199-R1  Name:"Similar to PTPRO Receptor-type tyrosine-protein phosphatase O (Homo sapiens)" Cuni1061:250377-279941(-)
SNYTSFITWKQAERLGYTKPYRTTPNDWTENLHLQSDNYTFEVGVDSNCDTYPEDRYCNG
PLPGGKSVIISVVVCTKAGCDYVQAEDIFVIKKLIFLVTVVLLYLVFLVTVCFALFSISS
HSLPIKMRVFEERVKKLHKDSNLLMQSEFEDIKAICKTFKSSCSEAQREANRVKNRYVDI
LPYDHSRVKLNVLPEDEETNDFINANYIPGLNSVREYIATQGPMQCTISDFWRMIWEQKC
QIIVMVSDLQENGRGMETRKVTQFFLPGWCDFSANVSFDDVLELVQIMRQEVTPDTSGPI
TVHCSAGVGRTGTFIALDYFMQYVHEHSLDDDVDIYDYVLKMRRNRPRMVQAESQYIFIY
DAVQEMIKKKIQQENERLYNSVNSESSASLVEREPNENSYVDIQLDEEKCAYINEAF
>Cuni_T009197-R1  Name:"Similar to DCAF6 DDB1- and CUL4-associated factor 6 (Pongo abelii)" Cuni1061:186086-218005(-)
MFSLLRDREHRGESWRRLYNTATGSLYFLQRLKLDKKLSVHDGCVNTICWNDNGTLILSG
SDDQQLAITDPFSGKTIVKFRSGHRSNIFSAKFLPGSMDREVVSCSGSGEIFYTDVDRED
TYGTNRFDCHFGTTYKLLVVPNEAATFLSCGDDGTVRFFDLRTKTSCSKFNCEEDVVIHL
RNAVTAMAVDPIIPFHLAVASSDGIVQLYDRRMLKTRETGGSSDSLICKFLPPMAGSDKK
HYRITSLNYRQGSHDVLVNYSSENIYLFNTYDTDKQQCYTSKPDMNGATSKPVGISSAAG
TSFGEASTSGAAALGASATAMDNGSDSDSAFKPIKRLRLRGDWSDTGPDARPESEEPALT
NTIMQRMSDLLTRMLNSHSERSGRGEEVEEEEDGESATSGRDDDLTPAEDVRDDTAATTS
TDAAAMLRSVMFRSARAAAVRSLSNHNRPSARFSISSEGLVSPELSSVDLEGPGETPAAE
TEAPPAQSRSHKVKSDHLEANEEQPCGSSREGSDPSHVEYTYPAGHSGLNTRALDISSRE
TATEGRVEELAVLVDNSSAVSETSSPDTVLKNTRFHLECISEANVSARNSCHQLHGVNVE
FVDISDSAFQNNPTDVLTETENVKLAKTVIDRPNVCPTNQTVMDSSEHVDACPQPRLILN
EVSGDHADLLSNCDPDVQLDMDTDQQSYFMFYSTVPGGVSHEANISLANDGAVPDSSSEG
IKLQQGEASVCMDPKSESNDSISDQMSTSLHIKSVSPGMAEPSEQSLIYGASYQNAVPVL
DNSHMAMETEDTSSHNTVLVELSEIGNKKDSMDTPLECLGRPLGLDTVDLAQMSASSSET
SSFNSVSTSWSESTVVSPEDVLNSPQCRLSDATHEKTLQNLQTSVCPSFIDGSSVRCRVE
SGQNPSVYSNICDSTRYPISLSNKRQNSPDQSAFEKSKHELIEGSTETMIKSNSDDMKAD
PSSGAENGKSCTLDLSSCNYQQRVPSGAQASLMPNNSTHPSRPIFGFYPSKSSRLTKTPP
AFPGKCTCCGEDIGERIEDIDIQKRNVVSERCLTCLRQEQSDHLQVTDLQQADEDGISMG
IGASQHDHVEQPGCVAGKTSQTMHHVESDSVLSHTDTPLSSYVGQQNTAKGKGIGKSTMK
FQANEKASSFAPYNSGRMIITSNADPDSAASSRSANHRAVICDQGLSSESSTADMVTMAP
SEASTSGCERHRRIGYSLPPTGNFQLHDIDSFSDDEEDEEQSRRRQKAKAEKDRMSLAAQ
KIQEMYRKKREAKEKAKLLDVPQPRLLMKYSGHRNCRTMIKEANFYGDHFVMSGSDCGRI
LAWDRETGRLVMYLDADRHVVNCVQPNLFVPVIASSGIDYDIKIWSPLEEESQFDEDKAE
MIIKRNELMLEETRDTVTVPAAFMLRILASLSQIRTGRNIVRGQSSQDSTGQE
>Cuni_T009194-R1  Name:"Protein of unknown function" Cuni1061:8137-8533(+)
PTLKHFALVKRALDSKIQVSKGSSQVLCARVEILQMEMVFCPWQMLDQTPTDHTGTMWLR
RWRVWDPRVENHPSLCLLPTVLHC
>Cuni_T009195-R1  Name:"Similar to Tnpo3 Transportin-3 (Mus musculus)" Cuni1061:32236-79330(+)
MSFNIDAPPSLDTVNQALQALYNNPDVTGKEKASVWLGELQKSVYAWQIADQLLQLNQSL
ESCYFAAQTMRTKIQYAFHELPPESHQSLRDSLLGHASKIAPGTPPVIVTQLSLALADLA
LQMATWKSAVVDFIERFSKEHMGFLLELLTVLPEEISSRSLRLGANRRKEITEELISVSP
VVIQLLTHVNTTVTGEEERDQRIRSKSYKVMGSWFSVGAIPQQVLLSTQLMNFPFQALAN
VNCPAFLHEAATDCVCSALYCSEDLEKFQELAQKLFQGVMTLVPAYHQADKHEESDKCLN
YCRIFTELSETLFNMMLNSPNQGLGTFQLLDLLLMCVGHHLYEVGEITFNFWYRLSEELY
QRDNQELTDMFKPYIQTLILSLCQHCQMDEDHEGVPDESGDFGDFRVRVSELIKDVVFIA
GSSSCFIQMFENLKSPKTPSWCVAEAALFVMTAVAKNILPEENEIVPQVVESILALPDST
HISVRYTSIQLLGELSEWIENHASLLDLILQYLLVGLQQPQLSSIAANALQNISTQCRDH
MTNHFQGLMHIVKSMETFSLSSDAAIGLLKGTATILSRLPSNDITEALRQLCACQISPLE
KLLCEESGPVKHGAANDPTVWLDRLATVFRHTNPSVPSGQTHPCQMVILEVWPVLSKACD
KYQSDVRIIERCCRCIRFAIRCLGKNSAMLLTPLVTQMVGLYQTHQHSCFLYLGSILVDE
YGGEAGCIPGLLDMLQAFCGPTFKILEEHNGLRNHPDTVDDLFRLCLRFIQRAPVPFLQS
SMAKPIMCCAIAACSLDHKDANASVMKYLSDMIKCMREKEDREDFQLRWTLVKKLLEDHG
QSLVVALINACLFCLPTFMSADVSEVLFELMLIDRPTFCVWLEHTLKALPTESSGGAVTA
TKKQLADFHKACTSAEDIKQVSGALREFCRLYR
>Cuni_T009198-R1  Name:"Similar to Smpd2 Sphingomyelin phosphodiesterase 2 (Rattus norvegicus)" Cuni1061:220612-237699(+)
MTVTLKILTLNCWALPFPVPCKNRRERVNAICDYLRNESFDIVILEEIWVKSDFQKLRDK
LQMKLPFSHYFYSGTIGSGVCVFSRHLIAETIYHRFQLNGHPHKIFHGDWFCGKGVGLCK
IHEEGLDINLYCTHLHAEYNAVQDEYEAHRLAQAFELSQFIRSTSVDCDAVILAGDLNIA
PKSLGYKVVTHYAHLQDAWAEKENKVCDELAGTCDVPFNTYTGAEAKLRIPNGERIDYIM
YSVKPNCKATVTDCQIGIGKIPDLNISYSDHEAVMATINISRVEENHPRKMRSALSKEVK
DSLQETLQVLDKGVNQCLNEEKFFQVVVFLLSFILYFVNSYVDAESYNNIIVAFTLATAK
LFLAFAVGFSVWTALILKRGEFHALIACKEDIMKLLGV
>Cuni_T007646-R1  Name:"Similar to CASP3 Caspase-3 (Pan troglodytes)" Cuni1062:65987-77742(+)
RRDVRPGAPSEPNEYNFNFKKRGLFILINNRHFEEEVGQHPREGSDVDAERLEERFQDLG
FEVRRYDDVTCSKMTSLLYDAASQDHSEHDCFGCAILSYGREGMVYARDGHVSLDLLVLP
FKGDRCPSLIGKPKLFFIQACQCRRHSIYLDPTSRQGKVSRSPSPVSPSSSRRSPMSPSF
TGDDDPVDACGLVHMRKIPVEADCLFCVSTVPGYYSWRNNQDGSWFIQALCIVLENYSTK
MELMHMLTHVNRIVAYEFASCSDREFGESMKQMPCIVSMLTRYVYFRPKKQDIR
>Cuni_T007648-R1  Name:"Protein of unknown function" Cuni1062:180076-203166(-)
MMASTTDDLPSCSKMSTEGIKVDDIVINKIPVVLLTKLDPDIFSRKIITVDEKGITTADT
KKSEAKKRSYLNDDDALSDVSITFSDSDDMPKELTTNKTGKKGGKEIASKEFKRHKPDTS
SVKVDKLNRNGNLHSSHKYGAQRKAGPVSKTDVDSQGRQSRPGASSQSSKHKAGKRTLEP
AEGDSHSSKKSKAEVTVETIIGSPWQATTSKTDKPHNSNARYKLFLGPFHVSALKSELFR
KFINLAADCVVSFNKKNGTIGAYNGSVDLFFGDYLTLESAMQRLCQFPGFDDKSVVKGTI
TCFEIRPVDGEQKWKAHFTAKLLFRFCADKKEKLERLIANKGRKMEDTKRTCVQLHQIPF
QINEEMLTLLFPFSIGVKISESVKKDVKGPIEIEYENKEWMEAVLACFHNFSVSVSQPYD
KIFKLIIRNLPLPSAKSQEKSPVSVKQRQTTGFNRDGHFQKGKSSLLGKYQPRTTSVGDR
NIGAFNQSPRANMGHVNRGGLINRGLINRGGFINRGGFVNRGGSINRGGSNRGPIQNRSP
VMADRNIQSQMAAQHEASQDAIRQIAISKGLDPNNTEILKVIEMKTHLEHLQTMVLHQKA
EARSLEMMQGQQAASERRLQLQNLAMEQAHEDAGARRLLAAQQAQHAREFEDQRQADSSW
PRDDILRHGFEIAREREMLREREIAREREIAREREIAREREIAREREIAREREMERERVM
IREREVEERRQREEFEAVRAQAIIADRLKQMSEVKANSNRGRHLQKNTRINSQQVSPFAT
NLAEKTGRADNRNIMPFGDAPPTQGLLGAAPDAAAGRNKGVPDVDRPGTGRSELQKERYP
QRAPQPGQNYREDKRESENTRFPGKRPRWNNEQDMEYGYNAVNTMDLDPDRNDRPLDFNR
PRPRLSAEQAFKQDIERTKAVLTTRQDTGRHSKSGGLLDLPRSHFEDVRERHALPLQFGK
NAVKKTPLEIEEERRRSAELNLTTGMERNARNFGGLQPSAKKFPGVGGVKGHSGVERTDY
GGARDVASIRASREDLQRGGTNVRGAQRGRPFNRGQLPSQLNKKIQPLEHVDTTEYNVPW
RRAQQDTVRAQDEQAWPEVRGGQELYEYDQEGYGHSYPETDANYNRKNEQRRPAARGGYR
ASQEYKVQAEVAALKAKPLLAYGEEQVEGYYGAKALKKPYEARESFQRGEADYELNYGEY
EEQDYAAETGYGQESARPAGRGRQVAQAREQRAGLLAGRGGRTLAARGGGGLAARGGGGL
AARGGGMAARGGHASFERPVESAQGRGGHSLRGGRLSDARGDGLLPTPKQLEDPYYEEGN
GETYPEQTGDDFSHFQAQHVARSRIQPQLAQPHQRLAQSNQLLGQRSGVNFY
>Cuni_T007650-R1  Name:"Similar to pkd2 Polycystin-2 (Danio rerio)" Cuni1062:290092-319736(+)
MSQQPGSRLSRNAWDVSYGDDIDNDPYPGMKNEVNKTHFETEETASDREMYVKTTLRELI
IYIIYLVVLCVITFGMTSTTMYYYTKVMSDLFLESKEGSDPNFKEVNSVDGFWKYAKGPL
LSGLYWENYYNNDSLPPNEMGYIYYENRLLGVPRIRQLKVRNDSCQIHDDFASYITECFD
SYSESFEDRAPFNMSQAEPNNTAWRYFSESELNGGPHWGQLSTYSGGGYYVDLNTTRSAS
EGIIQNLLTNLWIQRGTRAVFIDFTVYNANINLFCVVRLLVEFPATGGAIPSWTFRTVKL
IRYVTIGDYFIMACEIIFCIFILYYTVEEILEIKALKLAYFKSFWNILDLTVVLISLVCM
GFNIYRTVEVSNKLTGLLANPNIFADFEKLSYWETRFSNAVAIAVFIAWIKIFKYISFNK
TMTQLSSTLERCAKDLAGFFVMFIIIFLAFTQLGYLLFGTQVKDFSSFQNAFFTLFRIIL
GDFDFNQLEQANRILGPIFFMLFVFFVFFVLINMFLAIINDTYSEVKSDMANAKNDFEIA
DYFKKGYLNLLSKLNIKREKIVDLQKALHSADINQDKKLDFEEWRQELKSRGYADGEIEA
MFAKYDLDGDRVLGEAEQKRMQADLTALTKVYDDLDVKNPRPGTGQRSSSRISFNDGDSA
DDSDDGDSGTKSLHTGPISSGVSYEEFTVLSRRVDRMEHSIGSIVSKIDAVLVKLEAMEK
AKIKRRETMGKILDSISESDGTSDELKREQMEHLVREELERWDSETSVGISSACGVSPGA
GNVPAGLRPRSRAESAQHED
>Cuni_T007649-R1  Name:"Similar to AGO3 Piwi-like protein Ago3 (Bombyx mori)" Cuni1062:235143-263852(-)
MASGSGPGGFGRGGRGAALLQALAESARKPGQTEKELSQNTTPQTEPLLGSRVMRSAVAS
SEPLLPMGRGALLANLRESMLQAKKPEEYSTEQQQEAPVKLESSPQTTPGLFSSSGAGVS
ELVPKPLGRGSAAMKALLAQEQQQRHLPPSLGRRFDMPIQQHKERPQTDEADLPAQEMAQ
LRLEDQPVIRERVRFPTVTKIGTEGTPVDLSANYVKVLCKHKGVYQYCVAFSPAIDNRKL
KMKLLAEHKERFKTVNSFDGNILYLPFELPDKETVVTSKRITDGATITITVTFIKVVPPE
QCCHLYNVVLRRIMYILEMCQVGRYYYNGHTAATVPQHKLEVWPGYVTAIKEHEGGLLLL
LDASHKVLRTETVHDIMEKTAITNTQGFQDEIIRRVVGCTVLTRYNNKTYRVDDIVWSKS
PMDRFECKATGESMSFEEYYRKQYNIIIHNKTQPLLLNKRKPPKGAPPGTKPDPEFLCLI
PELCYMTGLTEDIRKQFTVMKDLAIHTRVTPAQRKLAMKKFISSVNSSPEAQAELAIWGL
QLDGSTISIAGRQLPQEKIIMGRKGFPAGPQADWSREIGRNELICPVNLVNWGLFYTRKD
SGRANDFARLMLSETRNLGISCQAPFRRELVNEKIDTLVQELRHSINDRVQLVVVINPTN
RDDRYSAIKKVCCVESPVPSQVIISKTISKPDKMRSIVQKIALQINCKLGGELWSVKIPL
QKLMVVGIDTYHDNARSKQSIGGFVASMNQDCTRWYSNVCFQRPGQELAHGLHICLTNAL
RKYHSVNHFLPEKIVIYRDGVGDGQLNVLADHEVKQLHRSFSSFGDYSPQCTTVCVQKRI
NTRIFKKERDGEVGNPLPGTVVDHTVTRRDRYDFFIVSQHVRQGTVSPTHYIVVDDGVGL
QPGLMQRLTYKMTHLYYNWPGTVRVPAPCQYAHKLAYLVGESIHKEPAECLSDRLFFL
>Cuni_T007647-R1  Name:"Similar to Ints1 Integrator complex subunit 1 (Mus musculus)" Cuni1062:92735-176278(+)
PTTAPGDFIALGKQSKTNEGDVKRPSSPQFLGRKKDAPGPLLTSSSLAKKPKLGGPAFGT
LGRPLGESSSLLGIASSTTVQHYDEIAITVLAADDDMNDERAEALLCGAVKHLRTNRSKP
DQIVYLTLMHLSKSRPSLFYSDIVTEAFCGLLKRELALTFKAKGNPLVSVLACNVLMNAF
ADEENWPDNFVKVFVEDSLGERIWVDREDCKTFVENIQTAFGTKKSPRHLLMATAEALRG
DPSGSSSPVQMSLDDDDSKMSDSGDWDKSSSSSSQSNCTPRYPYQQQAIETYILETITDI
LNRRQSMDSSPRNLIKLMTSTSGYSAIRNMAAQRIDMWLQNPKLTRVSQDLLLAVCTNCD
KHDQSDLEVIGHLTKMRMKTKPLINHFLNCMRELLSQHTENLRMILNHTIYNELSTSRNP
NNMALMAIIFSHSPEQSAKTVAEIFQDLLTNKDDYLKALRMLLREVVRCTRLDMNFASFC
LGLMQERTEAKFVDMDPALKERYVMSLADLISMDMLLSVAPNMREAAASFMQGDHKNLEL
IHVFKRQVSVIQRDAVWWLHTVVPKIIDLKAEAYLHCLKKVLFMESPEHYYNKDNWPSEN
ERGLMLKLTSEAPVMEDTLMRLLVIGLLRDLPLSAPDSVEIVEQLVCRAASLYYDLGLMD
ALRIERLEFTDAVLNLCVYKHPENIVLPQGYTPPNLAISGLSWKAWLTLLIITAYNPSVF
GEAAWQKYSTLQTLMEMVMTNNYTFPPPTTAVDEKMVEEYRARERQLRQQEIQLILEFET
HLAAATSKVAITESNSLLIGQLNLNDPEGPARFPPQEVIEQLKSLNASLKLGQMLCRSRN
PDFLLRIINRQGTSQSMPWLAELVESSEGSLDVLPVQCLCEFLLHEPSDLFTDGDGEDIF
GADRLKLKEKNKKHQQLLTRLQDLVHSSSTDSKTVKEVLDYFLQRLSSIQAATRQQAIKG
LSSVVTPPKYSEKLKDESMDADLRLPESGDWLLVHMTSLPLFDEVKDSLCLALRKACQVE
TDPAQIKTYVLFLSHHALDTSQQTWNDLILDMAQLLVERTSIVNFILPDLSVKPSEKTEE
QCQCLSAFIRLFVTYMRHARKEDKDTFSWSNTQDQILLQWESGQSATVHVLVVHAMIVLL
TYGKPKGPNAADEHMYTELFNMWIQDNNRMPSGFLLDTSEEALLLPDWLKLRMLRSSDDR
LINAALVEVEPAQLVLFVQSFGIPVASMSRLLAALDQAVASDRAAMSQAVLDPSYMANLV
DIQHERGAVGGLTFYKLLTQGKETSKSDETRKVDEEMPTEEVWNVKDTREVILPNSADKL
ARILDQIFSETTGTDGTASRLFQCILQSVSADKIKAAAVIKALDNLLSSSKREAFAQKVY
TATFRSCPILKVLIAKQPDLRGEIFPVMEKLHTLGTGQRSMLTSIVTQFLSSNKKSRQNQ
GSPAKQLEGIVNKCISKNHVDSQIFLDGMKKLKDQESVELLVHKMMDSLLSQGRAKDGTQ
LACEVLLQGVSASMTSSSATLIIDWLSLLDPEIVQSCPELQQKLLFARKISPSALGSGSS
CETSGFPSQAHLLALLTHQASWETLASCLTYLLKPDKIAELNPTTVLDFIWACEHIPKIW
QGREKRTQEVEQKEVVLSLTSSQICSVVDLIVEETLLLAENKSSEQVSANQLPAVIKSRV
DLLLSCICDDLDHVITVVSHLQLLYGQSSGLKSRCITSLTTCLYLQFPYIQSWLPEDSPL
LSELMASSTVQSQMDVISYRLISSLSQVGPGVKVNSRMYDANIACRKMAAHHPAIFLRQL
PLIGAILCGQTQFSSREMRHTNRFLLFTHVLGFLELLQPHVFRQEYTGLMEILDSFFSLL
QLHGEEKALGPQVHKLVLILQNFLTHDPHRALPVLQKQLNLLSNLTLVYPDMFELKTLLT
NLTLPRQSELRQTPKDEVKTSILPDTVTNTSSYTAAQLVPFMRRFDKDSPEELLTALQDL
DEMSKRKVDILMYFESQLRSLMMSPSDQCRGTAFALIMRALRQNPRKSEHFVATFLDCLG
SENPDIVTTALKNLAEFTALCQEEATGLLQKAFTAGIRMSLDSSSYISEALHMLNLHSTT
VE
>Cuni_T008961-R1  Name:"Similar to FMRFamide-related peptides type HF-1 (Cornu aspersum)" Cuni1063:542939-550246(-)
DSLVKNNRLIHFSPYPLPPVLDDDAFSRNSRQFYRFGRNYPPYQDKRFLRFGRSQPALDE
YLLLQQLRQSPLRKRRSQDLDVKDGLLHRTARSADKKQQPTNTELGKDLQKRETNKDNVN
INENLSREIVASEEQDLNKRFMRFGKRFMRFGRGDEDESYDKRFMRFGKSLGEDQNSDKR
FMRFGKRFMRFGRGDEEESSEEKRFMRFGKSGKEDGDVDKRFMRFGKRFMRFGRGSTDED
SDSFDKDIEDKRFMRFGKRNRRSQHMMTENLRHNENLETEKIHAKKTENNGYIRFGRNDP
FLRFGKKNDPFLRFGKQDPFLRIGKQDPFLRFGRQDPFLRIGKQDPFLRIGKQDPFLRND
PYLRFGRNDPYLRFGRNDPFLRFGKSFDGQIESGVDAVTLSRYLFLCVVQLTD
>Cuni_T008962-R1  Name:"Protein of unknown function" Cuni1063:568553-571609(+)
AGQFAVTNERLSLASGGLGWNKSVRRRRKEREVEEEKRGCLSETSGSFRACSHDFRTYTH
DFRTYTRDIRTYTNDFRTCTHDFRTYTHDFRTYTHDFRTYIHDFRTCTHDFRTYTLDFRT
CTH
>Cuni_T008953-R1  Name:"Protein of unknown function" Cuni1063:294000-294874(-)
MLRGAPTMMLIVDLCVATCFFNHWPQNDIFCPAFAYLMYVALTAECIILMNITIGQYLVI
VHRVSNKTCLHHHKHLRLCSLLGLPWLVTMAIYLLPLTQIWDKFGYDPKKGYCSLLSVGT
GAGFLTIGAITLTSTMTLITFYCYAAIFLVQFTSRRKINPDLQMDSARGKGQTRNIQLIR
IITAILINYTVTYLPFLITSIVDPCQVKTSESLYSAVIYVSWSHVATNPLIYALLNTRIN
AMICSGRLPCKSSQSTEVSRKVTDGIDDRDNEINTTV
>Cuni_T008963-R1  Name:"Protein of unknown function" Cuni1063:673197-675527(-)
PTLFTSPQTYLAETHTKGTLVQSAQQKNISVEQEILHRSMMFAARQRRTQAGTECEDTAK
IYRSYCLSSSKKIEALKSCSFFLHNPDLIYCMDPPS
>Cuni_T008956-R1  Name:"Similar to FMRFaR FMRFamide receptor (Drosophila melanogaster)" Cuni1063:379972-392405(-)
MSTIPGRAIPDLTLQMMEGSAERDMHIVIDTSEKTFANNLHFIMSAVIGPVVCLLGMAGN
ILSIITWQRPGMGGSTGRYLIGQGVANLCLLLMFLLCDSLQYWLPAVKYSVIYGAFFSYF
GFPVFYLAITCSIWYTVGLTVDRYIMVCWITKAKRLCNEARANVGLVLITLNSFMINVPH
FASFTPVFLKHSGEVNNSNIEKPKVAFTQTNFGAGEGGKFYEFWIHCIVLILVPWVSVLY
MNIMIILKISEANNRMADKKTSQSLKKSKESENQITRLLLCVTFTFLFCIGLQCIAQCLW
MKKPPGANLLMVSASYSFGKTGILFNSSLNFVLYCLTGKRFRIELLKMFGLINKDLLLSS
SMNTSTSNISTTSSGTPSSTRPVTKSA
>Cuni_T008952-R1  Name:"Similar to LNX2 Ligand of Numb protein X 2 (Homo sapiens)" Cuni1063:214586-271464(-)
MYTGLALTLSRVRLDAGMCATCGQLHEAHGTHLYDYHQQVDEDLMCHICLQPLVSPLDTV
CGHTFCSRCIHNYLALQHQCPVDRKPLAITDCQPSSILVRRLLDKLLVVCPNVDYCEEVL
TRCELEAHLLHRCRGAVTRCIKSSLGCSFQGPRSALQSHLWECPYRDQNAGKNPVMEGEV
STIEIQRREGESLGISVVGGCDTPLVCTVIQEVFPEGAVSHDNRLIAGDQILEVNGEDLT
QATHQQAVAILAQFFPVCRLTVYRERAEETRPIEKEEILKITLCKHKGKQLGIKLVGKRS
GPGVYILTLIPGSLAACDGRLKMDDRVLEINGQDVLYGTQEQAAAIITSSPARVQFVIAR
RSRPQTPDIIRSAAEHSKYAMFSDDHEKPVSPLCHVCKEKIVTINKSPSETLGVSIAGGV
GSHRGDTPVYITNINPAGCVGRTNVLKRGDVLLSINGSSLLNLSHAESVRLIRQRSDVKV
LTLRVIDSREITQGNHNFTPSWIYWLQMPQTCSLVKVITLLRSPTGSLGFSIVGGADCSH
GNLPVFVKSVVPDTPAAKDGRLKCGDILLTVNEHHLSSTSHAAAVEILKQIDGAVTLSVI
SWPGTVV
>Cuni_T008964-R1  Name:"Protein of unknown function" Cuni1063:682255-720407(-)
MLTYRKKRKKRIKECKLSGPLLSFLWMCLWPVLVSVGAALLPRAAGEDVPGVVSTSSYPS
GEVCGSMSQRNCLSKSCCTQFRVCQCPPGMSGDGGFHCYPTNTIQAQIQGDSQLLRTFHN
TSVVMGWPCRFRLTEFSTMRNVLKQTCLFQVFGVNQIVGGRIATTGVEVHLQLTQGSKIL
GGIGIRNDGKAANGVFTYTERGRNQFINELPVTGIDEQSDDSMADGSGSGDGSLIDDDED
NDKYDWGPPEELDVDGERVVSQIDEDNFATVDVPSCGTTVRFRAPDLEAVDDSQTPGPLC
EH
>Cuni_T008951-R1  Name:"Protein of unknown function" Cuni1063:153551-162681(+)
MRNLKKTLLLVFFVNFSPANMFSTDEEIFISDPCNRRTRSCALALRYSQCAQVINRETEC
SIRSVCSKLEFKHVYDLACRGQELLESLSRSLDPACVKKLESSECDLGMNPMTIFDYGNI
SKRFHLCDKIQASPIAKCLAGNVDYNTPDCTQEQYGSIVNVVCAVGAGRAHTIRLDMCLL
CVPVCTCLFIVATLSRLMHQLSVTEFEMLVVLH
>Cuni_T008950-R1  Name:"Similar to KIF6 Kinesin-like protein KIF6 (Homo sapiens)" Cuni1063:90098-142770(+)
MAHIKTYARLKPSKKVYPGYEVDSNTLRIHIVDNKECIFIDPQQVANRGCLSYEVSFTEI
FNPASTQEDVFNVAAKDIIQNFLNGYNGTIFAYGQTGTGKTYTVEGNTHQYCSRGLSTRA
LSMIYQYLARRVDDHISVYLSYLEIYQEVAYDLLNPTSRPPVPIPPFAKNITVCEGPQES
PLLRGLTLQPAANEEIAQMLLLQGQANRKISETPTNQRSSRSHAVFTVYLQARKHDSKVT
LKSKLHLVDLAGSERVSKTGADGQQLTEAKSINLSLHHLESVIIALQSDRVLIANSLAGE
DKSMDDNLPTQSRSVVSVTSGPSSDGGRPCRFVPYRNSLLTMLLKDSLGGNCLTAMIATI
SMEPENLGESVSTCRFAQRVARVANNARRNEEIDDKALISRLRQKISCIKHELVKSQGDW
RSLYSYDDLSDVLSRDDKAQCARIMEGFLQGDILDPVAAGICDRYRFLECLHLLKERCQQ
SQAALTQLLTGHRQKASSPGLFFEALTESSRDYNGDQRMSEAFQLGESLVAGYQRPAGFT
TSEGSMDISEEFFSASDNNGVCVTNPECFVLERKESESSHSQESYSEEKYPFKSSRLKLK
TEENSEQTIRNPEPENPHSRKPEERQQTRKPEEEHQHARKPEEEHQDDQEPIEKLKSDMQ
YQRLLETESSFRLKLKVLEQQLLDHQAYIQWLRNNKADPSHIAKELYVERNQLKIQARFQ
EKLNKLLDKKAKLMYSISLERQKSPFIRQCCKKSSYCDKNSPCNMKCKTGCCKQITPRNS
NDKSALRIKDLTFKVAASLNRCGDLKETSPLPADVQLQKDKGRYHPTDDDLTPTVREEYS
GNELRGKTPKISNQQISQEVQTCPDLSRQYSGQELQQKTSKISNQRQKHLPALSRQELRQ
KAPKISNKNTDKDQEATPGMFIQQQDQQAQAPPIAKQHTEKAHSQKISDHIADLHQLLTS
PRISKQADWELQQRTPEVAKPPGNHEKLSPRLSKHQVRPEFQQLTPEILKQHADQELQHI
FSKLQTDKELQQNLKTLSPTTVEPRQKSPRMTRQYADRMWLQNTKMSRPNPDRMKHQDSQ
IIPKECADHKTQSGPDYEKPCIAIEAPQNSRSKLAEKVVVSGRPVHDPKFTISVVVDKGE
RNIAKVESISEESQSTEKQVNAIEDYMVVD
>Cuni_T008959-R1  Name:"Similar to Rnf141 RING finger protein 141 (Rattus norvegicus)" Cuni1063:416291-417772(+)
NKETECCVCMERQACIMLSCCHEFCEICIDNWTRDEEHSNCPLCRTSVSGSDDTWVLMDK
SDAKDHTSDVHSYLMRIADRRGTPRS
>Cuni_T008949-R1  Name:"Similar to LITAF Lipopolysaccharide-induced tumor necrosis factor-alpha factor homolog (Gallus gallus)" Cuni1063:63390-69259(+)
MEAGPPKPYDPPPEYQPPQVASPYVSYNTGPVQTYPPQAGAQPPYAQTSKSLNTVIIQQP
QSLAISSVVYRYSQYPALVVCQHCQATVTTMVSYETGLLTWAVAGAICMFGLWLGCCLIP
FCINATKDVEHRCPNCKNVVGKFRHFG
>Cuni_T008957-R1  Name:"Similar to pno1 RNA-binding protein PNO1 (Danio rerio)" Cuni1063:398576-399289(-)
MEVENTTTHGQNKDFLLPKTKFWKRKQPHVDTSEITDPAVVGSGSKSEIRRILVSSHRYT
PLQKEWLKMFTKLVENRKLNVRLAGKETQEIGALQRAEDFVKAFILGFDVEDALALLRLD
HLYLESFDVTDVKPLKCDHLARAVSRLAGKNGKTKFTIENVTTTRIVLADSKIHILGSYQ
NIQIARKAICNLILGSAPSKVNGQMRTVAQRAASRF
>Cuni_T008960-R1  Name:"Protein of unknown function" Cuni1063:512747-512956(+)
MHCYRLRHPSQTIGKNQYGYIWLHSFIYCLSFPRSIEKLHFIHVSFVRGRTFSPPNEWFI
KGGKFPSFVW
>Cuni_T008958-R1  Name:"Protein of unknown function" Cuni1063:408279-410805(+)
MGQVSSSVSGSKSREQNTQLGSGRSLSNISYRDLLDRIQELNTITLGLTGRNDKVLRFVV
KNGSDRRSFAWKRKIRIQCQKVKY
>Cuni_T008955-R1  Name:"Protein of unknown function" Cuni1063:343327-347017(-)
MSRIIMMFAILLVASHLSSSVILRPKWYPYFRRDNQENGAGTGQQSVLATEALARQIRNP
EMEVVSVCQNGMTTDECVDKIAAVVGKILQLSNQKYLLY
>Cuni_T008954-R1  Name:"Similar to RS2Z33 Serine/arginine-rich splicing factor RS2Z33 (Arabidopsis thaliana)" Cuni1063:318221-332903(-)
MSRRDASVYVGRLSRNTRTRDLEEIFEPYGRLLRCDIKYGSEMAYAFIDFEDKRDAEDCV
KYEHGRNINGQTITVEWAKGGKDRRMTPRFDSSSQSNDECFRCRRSGHWARDCPEVRWGQ
PRRGGGGGGGGGGGFGGRRGRSPSPRRRSRSRDRKRRSRSQSRDRRSRRSSSRDRKRSRS
RSGDRKRNNRSRSGSRKSRSVSDERKKDSRSKSGSREKKLASTSRSRSRSPRNSKSKSHS
RSPRPPPDNHTEQEHSDHENNKEDGDRENGGGADQAGNDAGHRSRSGSKD
>Cuni_T002817-R1  Name:"Protein of unknown function" Cuni1064:933323-934219(-)
MLVTPRQDSYSNNLNNNNSMSLSPHHHRHHHYDDDNNSLRSQLTDPAAGKCYSPRPGHKV
KQPPHINICPPDESTTSSEQYSRNEELDNDMFQSPPSMVTQPTTSTSIASDEKHEVFSGR
LYILRHTGSTSSTSSSPTRSPSRTTAPPSPFRFSPPLSSQQWSPQNSPNSSPTTKNNKKM
PVFVKVYRCNLDHFAVITRDALYTSRPVYLNLRHSRVMPGQCLGRFIVAGQCDSGNVIEF
ETPELATLGQWLDAFHVYTPPGSPNRITGNSGNVGSSNTPPIPRSPALPTLTETDEDD
>Cuni_T002807-R1  Name:"Protein of unknown function" Cuni1064:474414-475478(-)
MWIQDKNKQLNVHFSSTCLFYSFIPVWLPAVIPVWVPVMILVWVPVMILVWVPVMILVWV
PVMILVWVPVMILVWVPVMILVWVPVMILVWVPVTILVWVPVMILVWVPVPILVWVPVMI
LVWVPAMILVWVPAMILVWVPVTILVWVPAMILVWVPVTILVWVPVMIPVWVPAVIPAWV
PVMILVWVPVMILVWVPVMILVWVPAMILVWVPVMILVWVPVMILVWVPAMILVWVPAMI
LVWVPVTIPVWVPAMTLVWVPVTILVWVPVTIHVWVPAMIPMWVPVTIPVWVPVLILVWV
PVMIPVWVPVMIPVWAPVVIPVWVPVVIPVYVLVVIPLYLLVVIPVYVLVVTHM
>Cuni_T002806-R1  Name:"Protein of unknown function" Cuni1064:425738-453659(+)
MGGTSYPDGRPPSPYLHRPPAHYVTLVHPQKNSIKAKYPHLPDFKQLQHPSNSRGLPPPP
AVYSPKPFITYSHLPHDRVWLESFPHISGSPSMNHICASPPKPDAASYGEHSQGHSPSFM
DCSSASQFITQHPPPAVRTSPGQQVQHPLFPAQFLHPPPYHHPSLYNSGHMFPYVVVHSG
ASDMVHSSANNNVYFDHSQAVYNSDTTNTFITDKPPDLYVHPGYAQLTSSHVPLQKVQDS
YSLNTYSSPITIPLDHALTDQNQSKPPKKLNAVEEEAYTFVASFCPHLGEKPYCLPPVKR
SKHPDKSIKQLAVGMESEKRVLGSFERYFAEQQIPVLMLCHYPLTGFMQVYKHEMSSPDR
DFASLPGEHSRSTLTLLLLSDVFSVTLVTVSIISGNSDFAYIQKGVHKAAAHMKRCSRAV
SKWLTFLDVVPDVRQVIAFPNLKKVVLQRIVKDKQFQESLDSVATLHVDDLSAPFEEEWS
APEHKQRFRQWMQEKIICHASKLTRDNLRLVVGALLSPRLSQVDFVNDQSQISPITEISG
SQKSTENIGDVSQLKLTIDGLTKPFDCFMDEYVMSYYPKLDKVTYRVPPIHFNIQSLRKP
SDYIQITQDGSLAVKPTLVLEDIKHKTLISIDSAGESKQNIPRHSDSAGESVHKTLIDHD
SRYFQGMDQIQNRRELENTRDSCNEIMPHGKSHRELSDPFIKGRLHPGLQQTEISINRSE
QNLVSNYIHASPISIRKGKSVAQSSIRIQDSCLDSSEESMQNPSYLSNSSPQLSDLEAGS
RKTSLSEAVLERRRAASAYLESLQDVDILSEVMTKDVRADEGENRVIGALEKLGQQFGPM
FIICDYQYNNYLNKLREEMFSKGETCRPIRAFGQTMRAEHDCLILHKKYGVLVVCIKAIG
DNFNDWGASEQQKITSTNKILEKAVKQLEREEAMIRHVTLDLDKKLACHKLIALPNMTRA
SVEQALAADRVLAEKIQGTLGHGAGLFLCSDELPAKFQSVWDDEGGSVWSKLVGWWKQVE
HLFKKAGRELSTQIYRQIVGRYCGLLSTVEVWSPTNPRVEVRNASEAVSECAGRFCKLVL
LPHQLEALCSNDRRVFLYGPPGSGKTLVLMLKAREWLLAGHTVILINSRPGSLEGFPYMY
GVYRRLQETMAQLKVHNYHLLMIRIDSLHFRAEDLAGVMPSCCVIMDEVSASCHEIIEHL
CCLQVRHFWCAGLFEDDKPNTKQVFTSHKMDKIIRCPPVIQSIMKLTEQDVKIQMPYKDL
YQSSFIGSISPLLHRRDAVSSDDERSSDKENCPALSNRGEVKKMNVLAQKTLNKFGVQCS
KESSLGSRFWVELSSHKQSSEEFCEKTYFSDRLREESRSESLNQRLREKYGGEKRNSAMS
NNKQNNNKVHHEKTGCPPEQGENCQAEVKFDLDSLNQRLQEKYGKRTETSTLSEDDENSR
HEPAPTGYSHEQRKDTQAEVKYDPDSLNHRLQKYGRKEENEDKLNDRHHSEAHDKKTDCS
QEQTQESQLEVKYDIESLNRRLQKVYGGKEENMDRPGISEQPLFEPQRYCSFDPQSYCCS
SAEMGLPTDGPRPHIIDHGSHAKSGDPKDCFQCGQKVAEVLEGLVRPDSGARDASARNHL
QSLQKSRLVSGLSYPGGGRMRPAKPSDSKLTLSSSVHIKSGLQVRHKLNAYLDSRSLVWS
DVLVVAQDMPKDCAFVAALRSRQIPVEVLMTGKTFQIEDLQMRKLVITRYKEVTGLERPV
IVFVPTHAPSQLPPSRSPTSALDIHLGQSIARLSPEDRTALYHMASRSLASLLLVLT
>Cuni_T002810-R1  Name:"Similar to ST13 Hsc70-interacting protein (Gallus gallus)" Cuni1064:619401-637564(+)
MGTNIQADQLKMLKEFVLLCQTSPDVLHLPELSFYRHYLESLGAKIPPPTHKAEPEKKSH
QEKPSTSDHAEEDQEVDEEPEEIESDLELSLDGVIEDNDEDMPVYADEAAEVTDEMIDEA
NEKRSAAMDAASEGRLEDAIDLFTEAIKLNPSSSLMYAKRAHLYVRLNKPKKAIHDCTKA
IELNCDSAQGYKWRGKAYRMLGMWEEAYHDLTLACKLDYDDESNALLHEVTPNAKKIMEH
KRKYERIREERELKKRKERIRKAREEYEKMKEQQSSHGDTDGGFAGFPGAFPGSGGGMPG
MPGLAQLLQDPELLQAFQ
>Cuni_T002812-R1  Name:"Similar to pan3 PAN2-PAN3 deadenylation complex subunit pan3 (Xenopus tropicalis)" Cuni1064:675312-725414(+)
MQQSNNSVGAFRNGQIGGQVQEVTPGDSMGTNGDQYFSATFNALGIQDFPPFRGGPRPRS
SMGTLHPVAAKQFGSTSGMDQMPDDFAALNLAVGPLHNKGHNIMTEFEPKSPGLPHSSST
SSFASYASMFGQSPVTTVANSGHFIPNSTALPASGASVHNSLFHQGIANPSPLPPTSAPT
HNSLFHPGPHGPLGSTPGAHNLAPVFGASPQNVSAAAPNPVSMFGPNLQSSAPVSANPVS
TNGLVYTSAVSPVHSPHISPVNSPLSGRRLQSPNLPSLRQVTIPHKSASSSLVQESVGGT
TYFYHPDDFKPQNEGPQLSLPSFCVYPAMPAHVVHLRMKSSVPQYFAPDELKMDILNRHV
LTMMQTDPASPIGVDLPSEVDNYQNLCPLERIGPSKPSIGNLPSTTYKALCTKDGLYYCL
RRIHGFRLAGTKFTSIIENWKKLYHPNVVMLKEVFTTKSFNDNSIVFVYDYHAGAETLMS
SLFSPHHINGYSQHSHHPFSREHGKSNNTQRSVNSSLLPESLIWTYIVQLSSALRAIHSA
NLAVRSLDLNRIIVTGKARLRINCAGILDVITTENSAATQNINAYKQEDLTAMGKIILAL
ACNSLMCVQRDGIQSAVDLVQRNYSPDLKNLICYLLQNPSRVRSINDVMPMIGARFFTQL
DTAHLRSDVIENELAKEIENGRLFRIMVKLGCINERPEYNSEPSWAETGDRFMLKLFRDY
LFHQVDDRGVPWVDMAHVIQCLNK
>Cuni_T002823-R1  Name:"Similar to Btbd17 BTB/POZ domain-containing protein 17 (Mus musculus)" Cuni1064:1328050-1358364(-)
MLFVESRLSPLSPSYGHKFESMEDRDTTVLSQETGLTCYNIRVLRDELNFIQNVGQFYNQ
QDISDVILKIGKEKYYGHKFVLAKSSEVFRTMLYNKNWTQAGLPEIELEETDECQAYFDT
FLRFLYTAEVNISVESAVGILCLADKYSVTSLKNLCTQYMVEHTRSPLVKNALSWYSWSK
ALHMEELITQCSKTIAWNAEYILASHEWEHMDIDFVTDMLKNKDLVIQREYMLFKALIQW
LDCEEHIENYLENAKKLLPLIRFPQMQVHELFAVEQCDLYRNEELGVILDQLINKAYRFR
SLCPQQSEIGISFADSFYLPRNYIDLSVDTVRMQNTLRYGIQVDVRTYVGPVPSSARDGE
WKIAYRKSNDTWTLQVYCHESALVGGEARVQAALIITNQDDQVVQVEESEITICSRGNHL
TMSIAVPNQDQCKNMAVLIKPLPK
>Cuni_T002803-R1  Name:"Protein of unknown function" Cuni1064:47921-60062(+)
MELRINGLDCQQAVEQLGTSICYTQEYTSRLCCEVCRPRKQPTRTGCEYGDHSQQCSNIS
PGDCYDVRNRQICCDTCDKLRKRDAAIGCEYGDMSVRCDAVRQNPGLCYRPENQRICCES
CSQSRNVSNPACPWGNFDQNLCQMFDDQTHNVRVNCYSHQKRRLCCQTCERLKDWLPHNL
PDDCQYGDRPVIFSTSHYGRLNCSTILNYFSVDECSTNPAVYVNCCYTCHRHLQGRG
>Cuni_T002822-R1  Name:"Similar to PCM1 Pericentriolar material 1 protein (Gallus gallus)" Cuni1064:1260313-1313113(+)
LQALMSRQEELNILRDETTKKLMEVKARDNLASSTLAAVIASKQFMSSRPQPMQVLETAL
RASSMGAGQEEEEEGAGGAAGLDRQLKSNIVAYPESDDEDNSKVLGMEALPNKLMELKRQ
LHYLKNEFSQISEDPNMETDTRVLVEGPQQLQNKLHELQNKKLQLDMRLHELQLIHSPSS
DNSKNNETSAQITAFSPIGPATSHIPATVHNQQQQQQQTVNKPAVSSGSSSVSLPSNLQT
QANALTSFADLTGWSEFGQDPGANLMPEMMQELQEKLRCLNEVREQLNQLKSSVQFSEIE
HAELEALQQKPRQPQQKPPQLQQKPPQSQQKPPQLQQKPPQLQQKVPQSHQKPPQSQPKL
SGNRYPQQHDEVVAAASPRNMTQLLNLEGTDPGDELSDEDNVSASKSGSVWSVLGSWDHD
PQVQEKVRKLKSAEENLRQLQDLVSFVQQSPDGAVGVPKEQAGRASSGDVSRATGTYDLN
VSVSEGELPSESLKILQRDDSGEEVEDPAAELEKLRRERNLLMDLQTQLQHIQSQVRTTS
GPSSGEERVRTRPESSREKSRLEQVSSTPVVTFASNDELYSKIRRQRILHEELRSKKREL
EAIMKKDHNRRQYSRNQDNQSDSVSLTTDMFGAAASVDATMATWGGSTADNLENITEDED
GQDRDSSNHREEDQENEDVRNPSRNRSSNRNVQLRGNLSSRTENQQRSLNRQQNDDDAFL
GAPVDWYGNIESRLSGLTTAVEALLKKSENDGRQLHVSVGHESLPHSITGPYRPDQQQQQ
LLQLQNQSLMLSFGQLVQTLTRQQGDIQQLQQQVQALQLQIQALSFEHMTPAVTVNLPSP
FRQPQPSPVVSTCSSRPRVTPAAATLGVRPVVIKHQQKPHLQSQKQRNVNNTDLFINHSE
ASSGFASVQSGSLSLSARHLPQGADKTPADGACSNLDTSQPQSVFQQGPATRKSGKVKKS
NSDSTSGVRMPVARPENLAEERRRAYPGKMDDGQAASRAPAVGQAGIRMDGFDQDGSGYS
SSQSVSSQFSVPAPARQGDSGAAVTNSSTLFDTLRDTIYTEVASLISQNENRPYFLLELF
RDMQRVDSDSMRQQALNSLQELVSSGYRNVTSAWSSGPTWSQSTQTHSETVSTGLIPDKD
STSEDDDDGDLLEARLQEEIEERNQLEKSIRSGTFQGAPFDYAELVDNPSSLSTPTNADD
EHLNLQHQHVDTEPQRQQQQQQVQIIMMAVNNFIKKRAGDICSVQLLNVIIRLVASSVYV
SGGQEFVRLFQQQLTSVLEDRVVKYQGRRMIECGEELVSDISDVLYRQLADLGLGHNFDD
RVVTGQGISRDWPLQMVESEQTPEHGSLSRTPTGGSSQVEDVQKVTGSEKSESEHDDDDA
GVSEESFCYVGVSEQSYTVELAQSETKPFTRIGSDEDDDEGDEVWNLNDPNETAVSRDAR
LENGAPQYPLVPPPPTRPEAEGAREDGAEKQNVGQPASPKPTTCGRGEEVDGSLSGTHTA
DASQVNVNGSATDNTPTTNEDQTSASFQEKLTQPAALPDSATHSDSVELKGRYQEEQTSL
NGLDAVLASLGGMEELAGDESTVLGPEAFLN
>Cuni_T002813-R1  Name:"Similar to Gstcd Glutathione S-transferase C-terminal domain-containing protein (Mus musculus)" Cuni1064:748877-786006(-)
MTLYLQGCLTEDGESILCPLSSSVILFFIRYCQTNQFELVFVPDSAGSINMCCSFQRNIL
SGLSVRFTPWTEVPSVVRNVLPPSLHQPELSLVRSGMCVLLRHIIRESDTFSPDLHLIDL
LGFRQGSMRMCSEVSGFTKLCEVELPDSVSQFVSTLRTLFLEKADGGESSGSRQVILPSA
LIKLDDHFRKNCRVHNDNKRRREELSKLKNYLRKVSSSKVTNATNIPLYNIAGRDPMFIE
TCEEQLSLQKCLSLEDSCCKSSEHSTDLCPNEESFNIRLDVLSQTDSWLQIDHVTQLHHG
IHRLKVDKHFDVSSVRLNAGNDGAGKTIQDWQKVEFTTVMTASGCLKGSNRNSTFNAAVL
TDISELVDQLTHLDIQYEHTYSEGVEMTLADLILYVYTYHLLEALHFRSALLVDHIPSVL
HWVDHMTSLATVVKAGQRSGWDMERLLVGLGTGLTKDGTDKISGCLNHSREIVFVKEPEL
PQDAEEDEMELSRCARMKHKALKPDVTEALQKFELANLRPVIGSHPCGADVGITWDHLPA
GVHPREGDVPKSRTERKCQQLENLVTAVQTLYTPGDVLVDFCSGGGHLGIILAYLLPDCQ
VYLVENKEESLLKACSRLHALALTNVTMYQCNLDYFIGTFDVGVCLHACGSATDMVLQLC
LDCQASFVICPCCYGSIQKTHLLSYPQSQQFVDAGISYKDFLTLGHAADQTEFNIALEAQ
GRLCMNLVDTDRAEHAREVGYLVTLCMLTPPACSPKNNLLLGTTRQR
>Cuni_T002804-R1  Name:"Similar to Parp11 Protein mono-ADP-ribosyltransferase PARP11 (Mus musculus)" Cuni1064:180486-202447(+)
MLNQPFHKGSLNIGSTIPKDYEFFSNSQSDQDVDGKSVAHWNETDYIEGKGNQEIHTEQD
VNKDCKASGRLLQYSMDKGVTHKDFEMNQRQKFFMDKGDVTMDAECGFVIKQKRVSAGSK
LHRRTCVPFTSSSKTSNRFIDKLNIDEDIEAPVSFKQQKSGKCSVSKDSVFSDFSEVATR
NTNEEIKTEIEQNVHWEGEKSENNSTEKKLSFMSRVMDCSQHCVDMNGIHCDGTDTGVII
LHSKSLQNQPVKKCLSTLDDWLQTSNGINDIKMKTDHNDDDKNEGLFLLDDCSVDDVYLE
SPCYSDSLAVEDLQKQEVSDGGLNREVVSPAMDSDILPLNDFESVEDLSPQSSLYDSTQS
VQDSALPMQDSIQPLLGCTQSVHGNTQSVQDSSQSMQDSSQSMQDSSQSMQDSSQSMQDS
SQSMQDSSKSMQDSSQSMQDSSKSMQDSSQSMQDNSQSVSSTASTSDSISQRDKVSDISD
SKEQLTITDSGYFSSCDLVESSSEFTITTELCDSSEQEQTAMNCSERNTDIGDCNLTLGN
VASSSVSTLSLSFLLSPGGSSHFGSNLQSVNHPLNSGEQQRSLHIQRSPASSRSLFTERN
STDISDTGKCQAGKTSASSSPALTASPGCSCGSPKPLADRRHIRSILNTYVSHRLKPDVC
NDSVSDITDELALILRSSRKRVATGTDANTIPVKKSNVMETNSSGNSKECKKKSKTDVGK
DVSKSAWSRIKVKPTVQNPDALLVVCSMCDISSSSVRTGQCKNGHAVCQTCLEDHVRLVM
ASDKVHLSCPEMSCNAAISLDSLSHVLPPLVVDILNDNLRLKAQKATAKAMKKMRELVIC
PHCACPGMLDEWTLQFVCGTCNSNCCRYCKAAWFRYEEHDGCFLLSFVGAECLQDIVKVP
RNWDVSITPFNKNYVQVNVPLDSAEGSTVAAFFAKTSSRGANVIQVFRIQNRKLWEKYVL
KRKHVEEEIGTAELKEKFLFHGTRAENIVSICSEGFDIRVPTANGALLGKGIYFSATVKY
SERYTDQSHMMYLARVICGWSQQGQKLLTRPEYHSKVRRMYDSCVNDTASPTIFTVFDNS
QCYPEYLIQFEH
>Cuni_T002816-R1  Name:"Similar to dos Protein daughter of sevenless (Drosophila melanogaster)" Cuni1064:890249-909421(+)
MNRRKVPPEMASVVHSGWMTKSPPERQLRLHFKIFHSHWKKRYFVLRKPTGSLPDQYELH
YYKDQRCTNKKGSIDLDQCEQIIEALDSDVFPYLLAIKTSYKHKIRTYYLATDTEQDMNT
WVKWLCHVCGLRPEDQPTDIPDLKPDQTAGAGAQRSGPMVVNGTTCSPHQQVKLSDSPMS
TNPRVSAGHLARTHSRASTSSETSLGHFSPGNRLTGLQSVGRKTSVESTSESVAPPLPEK
RHLLHNNGMTSVDDDVFIPSVYDHPPSRRSVDHPSVRGIMEHTSKHKESSSLYKVPPYLT
TRDNKLSVGETSLADESTSLGRSPLTSLSSSLDSWTSCSIHGQAVTSTEGFDYPFSNHSL
SVSTDNEIPPERPPKPHHLQSPYQNLPPTGKTSLFTDLNTVLAHPKSNQPNSGTGYDIPR
SSQRSMQHHHQAELSHVPSAALRSGSQVSGNYSSHLYLNTMNKSGPGEHPGGSQGGSDED
YSVHSETGVAAPAVPPPRAGYPGESPAGNSGSLLLYQCPPSPSSASASASGNASRPGLRL
LSQGPSVSSRVANGHSVGLNQEEASTGIFSTKRTRSFKSPYSLKSSVARHSPKVNSVSLS
ATIPAPRPLLPPRPKEMSTSEDDEEMRVHEPEEE
>Cuni_T002815-R1  Name:"Similar to Ing1 Inhibitor of growth protein 1 (Mus musculus)" Cuni1064:860649-868204(+)
MVNNAAVEAICSATYLSDYLDTAETLPDELQRNISQMRELHVKNRAILKEINSMNNTAMK
ESGSSKNVCRALQRALVHCQEIGDERIALVQLITDLIENRSRQLEQDKEHLDPRSTKEPE
PEVIIVPVKKEAKVEQQEKPEKVITFKRQRRQKNDVAEEEVKPEEKEKVPKKKKKRKVGK
KDGNPPEVQVDPDEPVYCSCKSVSYGEMIGCDNEKCAIEWYHFGCVGLRTKPKGKWYCSE
CRGDKSNVKRADK
>Cuni_T002805-R1  Name:"Similar to EFNB2 Ephrin-B2 (Homo sapiens)" Cuni1064:223508-232835(-)
VDSYNYEVCVINDTSKKIPILNCTNPESSKFFTMLIFEFQPIPGIPDFQLGKNYYFITTS
GGRKFNINNQYEGACKENQMKMMLRVRPKTTEGVNSNPASNTNNNNNPPTAQLKTTLTST
TTATTALLTTTTTTATTEVTKSTARRPSKNNHHEKPGEGDNVPGFDGFPDDDTVIHAGEA
PNINSGIIADNGLESSGVSIYRQHKHCVHCLDLITSVCFLISAVLAGR
>Cuni_T002819-R1  Name:"Protein of unknown function" Cuni1064:1176116-1185409(-)
MKSSQGELTVGLFLDLFARYSDSLKDMHLRRTSALIEYETCEKALEKAKPVKKAAAEEAY
EAAKKTFEHSSEVGKKEITAFTQLRLLNASDALARYAEQQMKISQEFHTQLFHSRKALLE
LEL
>Cuni_T002818-R1  Name:"Similar to ENPP Enterin neuropeptides (Aplysia californica)" Cuni1064:1140186-1151893(+)
MEPRRIFFFLVGLLVCEGFAQGSPVATMPRSAGRLKRRAPSMDINDVPTYPTVTEYLQSL
QRNPEMFNNLNLPRQWLYNPLNLPFNPVYLHELAKKRDVSSLGAEDLPYLREILLAGNND
LGGTVLGELPFSENYVKRRLPQNAKNRRPYKRISLGLYARRAPHYSHSFVGKRSDYDSYT
DSLPAKERMQRTGFGYSHSVIGKRSAPTVSLRENIDTPGTIYQTQPGVSEPGTQKNPHLG
GPYVAENRTLHTASVSLGKRSMGYGHRYIGKRTLHAAASSMEDRRGRLGYSRDAGRFDAL
EAVEDRPAARLKNAYGSNKQQLRYILASYNQSSIDRRTRYGHRFVGKREHDHDENVLEKR
PKYGHSFIGKREDGDQNSIDQNSIDKRPRYGHSFVGKREDDDQNSIDKRPRYGHSFVGKR
DNDDQSSIDKRPRYGHSFVGKRDNDDQSSIDKRPKYGHSFIGKREDGDQNSIDQNSIDKR
PRYGHSFVGKREDDDQNSIDKRPRYGHSFVGKRDNDDQSSIDKRPRYGHSFVGKREDDDQ
SSIDKRPRYGHSFVGKREDDDQSSIDKRPKYGHSFVEKREDDDQSSIDKRPRYGHSFVGK
RKHDDQSSIDKRPKYGHSFVGKREDDDQNSIDQGSIDKRPSYGHSFVGKRDNHDQRSIDK
RPRYGHSF
>Cuni_T002814-R1  Name:"Similar to CARS2 Cysteine--tRNA ligase, mitochondrial (Bos taurus)" Cuni1064:829947-859051(-)
MLGQVCEKLCLSHPPFPLSASRQLLTWCQYRYYYRCVSSQAYGYTNVITGRQRSSSTRGS
LLQSATVRAHSTERAHKWEIPQGYATQIKIYHPLVKEQVPLVLLQEKLAHWYACGPTVYD
SPHIGHASSYVRLDIIRRIMSSVFGIDTTLVMGVTDIDDKIIQKSNQTGQNMAEITQLYE
SEFFASLAKLKVTPPSITVRVTDHVSHIIDFIRQIEQKGYTYRTADGSLYFDVNKYGHYG
AFINMQIHMSPETDTDKRAPQDFALWKAVKPGEPFWDSPWGKGRPGWHIECSAMASHVFG
SNFDIHSGGEDLTFPHHENELAQSCAYHGNTQWVNYWLHTGHLFLSGQTDKMSKSLKNVI
SVSELLQDYTPNHFRMLCLLNNYKNRIEFSAERMQKAVSLVATLNSIISRCDFYVKGQVD
CGDIPEAQVYEKLQSTRQTVEAAYADDFNTPRALAHIMRLVKFMNQLLEEVTHTQTISAR
SPAPVAAVGAYIGRVMNQLGLDFQQRKVEDDSEQPLQFYSAVETLVSTRWKIREFARDKQ
FVLRTAGEVGVPEDQAARLMKKLYSPLWNITDGIREDIRHSAHVEIRDGASGSTWTVVDS
KKKSPVTDSSIEATAPHLNVSQVEDSNNSPGERKFKTPS
>Cuni_T002811-R1  Name:"Similar to SRL Sarcalumenin (Gallus gallus)" Cuni1064:652852-669435(-)
MSTAGKTRKHGPAVWHIPSCLYALIILCLCVRLNLADAAIQETLRELVRIYESAVKPLET
IYRYSDLNKDASLEAEILAKPLILLVGPWSTGKTSIINYLLNIEDGKEKLHTGAEPTTTD
FVVLQNGTKYRTMAGMQLVSDKSKPFAILERYGQVFIQRLQSIELKSPLLQLFTIVDTPG
IIETKKQQERGYPFYDVLQWFLQRASLIFLVYDPTKLDAGLDTVFKQLKGHEAKVKILIN
KADTVSQKELMRVYGALFWNLAPLIQSVEPPRVYIGSFWSKSKSDHPLAQLFLEEEEMLM
HDLYNVAENLVEDKIASIRRHAFMVRLHALTVDSFLQAFEKNRGWFSDPEAVCSETVHHP
QKYNVFQKLMQQADISKHDLPSAETYINFFSNNRREIFPNLQCGFFGGCYIEKITQAISN
DLPLLLKTLKEQKQRQTYCTKETC
>Cuni_T002821-R1  Name:"Similar to Pcm1 Pericentriolar material 1 protein (Mus musculus)" Cuni1064:1232777-1248806(+)
MASRGYQPPKQGRPEPQRQTNWQRSFSSDREDAHSLNSLPGDMRINNWDLSDLHPSNLGV
NSKRHKKSKGNPEREREQSLSVDSPPNEKKHHTPSSYPRTKITANTPTSQRVALENIRQH
MTFSDMDDEQANIDGERNNERQVRHKQQSLSNGSLNRAHSDDSIRAASLGLLSRNNNMHR
SSKERGPDRNEIVARLTQIRDFTKQARSMLDSLERLGNMKRSEDVEKVQRLIRNLQEQEH
GYKGLLENSM
>Cuni_T002824-R1  Name:"Protein of unknown function" Cuni1064:1366306-1383705(-)
MFLAELLLRRITGERVPESHSSSAAIAMPNYQRPPVRQTGSRSSTPLRGAAVNPGLPARR
SAGSSAARRVSQGEQGEAIVAAALRSESPVMAELACMSASSCE
>Cuni_T002820-R1  Name:"Similar to emc7 ER membrane protein complex subunit 7 (Xenopus tropicalis)" Cuni1064:1210849-1215585(+)
MDEPLQCLQFLLCVFLCNLNFFVTGSDTDEISDKAEFKLEGKVYVASKDKEWTMHSRVLV
DGGKYLGFVKTDGTFVVHGVPSGSYIVEVANPDALFETFRVDITSKGKIRARRVNFLQPN
LVKTVNYPLEFRERGKPNYFHKREQWRLTDVLFNPMVLTMIVPLLLIMVLPKLMNAADAD
AQREMQNQMSVLNNRPSMPDAAEMITNFFSGGSSSRKAVKSKSSTVSKRK
>Cuni_T002808-R1  Name:"Similar to Eip74EF Ecdysone-induced protein 74EF isoform A (Drosophila melanogaster)" Cuni1064:548426-596375(+)
MLSTAISMEALDESESGLEPPIRADPFLTQTCQVHFLQKVSRDGNSSVIVLPQPSDFVEL
LSERLNVLDSDSIDFKSSSFMNIDISSLDTHLFSDSGEESDDSGIHSFSDVSLFTLDACE
QSYDGRGREMAAEALLSMDSPSTSAEARTFLQGILQEKHMSRHQQQHHLSSLPPSPDSGL
DSELDTSSIEDLKHRHQGTACNKQSSGVSLASPLSHPPPAHQHPLPAHFNAATHIAMRPD
HYDFSTTLANQAAAHSNKDSSSSAKCNHRSSSSSPKSSSSSSPAFSQPPTAASGDKPRAK
KGRKPKYPDYPYTSPPKRKREGSAQYLWEFLLQLLQSQETCPHYIKWTNREKGIFKLVDS
KAVSRLWGQHKNKPDMNYETMGRALRYYYARGILNKVDGQRLVYQFADVPKNIVEIDCSK
V
>Cuni_T002809-R1  Name:"Protein of unknown function" Cuni1064:600769-601128(-)
MVGSRLVTGWVKVSHRLDGWVKVSHRLDGWVKVSHRLDGWVKVSHRLDGWVKVSHRLDGW
VKVSHRLDGWVKVSHRLVGWVKVSHRLDGWVKVSYRLDGWVKVSYRLDGWVKVSHRLDG
>Cuni_T019886-R1  Name:"Protein of unknown function" Cuni1065:28521-28735(-)
LAVSDIGCLATLIWTNICFTPAFIEADLPFDTIEVTYLTSGIPHVTFTRVTGWITALITL
ERCLCITAPLK
>Cuni_T019884-R1  Name:"Protein of unknown function" Cuni1065:14089-14329(+)
MSVLLDNASSSVLHRDLLDGHGTVIGSDSFISDKAIIIFQYVMITVICQFINIFGVGTNI
INIMCFAKQGFNDSVNICLL
>Cuni_T019889-R1  Name:"Protein of unknown function" Cuni1065:276260-279402(-)
MKSLCFFATLMTVAVALPARDSLEIKKRILGLLGGQDEGGLVGGLLGGEGGLVGGLLGGE
GGLVGGLLGGEDGGLLGGILGGEGGLLGGILGGEEGGLLGGILGEKGIIGGIIKTATDLA
SKLLDTILGLLGSLTQGLEGKTTEPEIYAVFRQHKIGELCPLCDNLPKRELVSACKKFCA
EQNWRAQ
>Cuni_T019885-R1  Name:"Protein of unknown function" Cuni1065:26771-27121(-)
MFQIKVLITPKRASIVIILVFVVLIFSMAPVYVVNRLGWRFFPEKNKTLLGLIHTQDREK
VEKISFAINNAFVSFTAFVVILVCTVMLVVKLHKLTVWRRKSVLITQSDTISTKNQK
>Cuni_T019888-R1  Name:"Protein of unknown function" Cuni1065:227132-234162(-)
MKSLCFFATLMTVAVALPPRDSVEIKKRLLGLLGGQDEGGLVGGLLGGEGGLVSGLLGGE
GGLVGGLLGGEDGGLLGGILGGEGGLLGGILGGEGGLLGGILGGEEGGLLGGILTGIIKT
ATDLASKLLDTILGLLGSLTQGLEGKTTEPDMYDVFRKYNTKDLCPVCSSLPKPEQVSTC
QKYCAQQNWQAQ
>Cuni_T019887-R1  Name:"Protein of unknown function" Cuni1065:58577-58811(-)
MQTERTSLASVSMLPNASLIGELLSDNLVSDDARKLFQWIGYSIVCELIDIFGTVTNIMN
IICFIKLGFKESVNVSLL
>Cuni_T002151-R1  Name:"Similar to Thoc1 THO complex subunit 1 (Mus musculus)" Cuni1066:1136768-1173375(-)
MAATAVLEFDKARGKFKNVLEKSLARNDVESLLTFVDSYQDDIGLEKRTVLDQVFRDVLC
KMVSDTSNAELLKSVITFAIQAVRQDMCSPSTPFLMMADIFDMLTIERCEAIFDLVEDKV
TVWKSEPFYESGKNYLLRMCNDLIRRLSKSQNTVFCGRIQLFLSRLFPLSEKSALNLASQ
FNLDNLTIFAKQEPSDEAQGQIKNEAMEVDNAEQQPSSIPIDYHLYRKFWALQDYFRRPT
QCYEKTSWETFSQNAGDVLSIFSSYKLDDISSSQKKSSLPHQTHQHPQNFFAKYLTSEKL
LNLQLSDSNFRRYVLVQFLIIFQYLRATIKFKTAAHTLTDEQSEWIKECQEKVIKLLCET
PPNGEQFCNSVKHILEREEHWNNWKNDSCPSFIKEKPKEQNKAKAKPKRKRIGDDLLASG
DKSLKLGNPELTRLWNLCPDNMEACKAESRVFLPKLDEFFANAIEQADPEAMVEEQYKDI
NQHNFQWKAYRLLARSSPHFFVHTNTPGLPLTVHLKEIVDKMARDINP
>Cuni_T002131-R1  Name:"Protein of unknown function" Cuni1066:15419-16478(-)
MNTLIVTHFSSYDIYLSLRSIGSSRKKAGRRQEEGRKKAGRRKKEERKKKKEERRKKKEE
ERRKKKKKKKKKKKKKKKKKKKKKKKKKKKKKKKKKKKKKKKKKKKKKKKKKKKKKKMNK
>Cuni_T002140-R1  Name:"Similar to Feeding circuit activating peptides (Aplysia californica)" Cuni1066:711116-712837(+)
MPFSRFLTLAKSANQNGVNNQRSVSRDDTSSSEDDQTIFELADLPQNTWYSSLGPQSGRV
FGLPYGSQSDTEKGKRYFDSLGGSEVHGFKRSVDNYGFDRRKTQREYLNEPLNKNVVRHA
YGSRSRTKRDAAEVTKSLSHHSTVDSEGEHELQKRSLDSLGGYQVHGWKRGLDNLGGYHV
HGWKRGLDSLGGYQVHGWKRGLDSLGGYQVHGWKRGLDSLGGYQVHGWKRGLDSLGGYQV
HGWKRGLDSLGGYQVHGWKRGLDSLGGNQVHGWKRGLDTLDGHTDQGLKQNSEKRGLDPL
GGFQVHGWKKRSTRSINGNGFNNQDISSARNTKAGETGSINPSDSAWDSSSEVHSQQQEQ
KRGLDSLGGYQVHGWKRDEEKRGLDSLGGYQVHGWKRDDEKRGLDSLGGYQVHGWKRYAN
EKRGLDSLGGYQVHGWKRDEEKRGLDSLGGYQVHGWKRDYEKRGLDSLGGYQVHGWKRDD
EKRGLDSLGGYQVHGWKRDDEKRGLDSLGGYQVHGWKRDDEKRGLDSLGGYQVHGWKRDD
EKREFDSIDGRGTIWGGINMGNSSSLYPRRPQC
>Cuni_T002141-R1  Name:"Protein of unknown function" Cuni1066:726435-726712(-)
HDPHVLTSNRFQGGRWRRSQGRVPALMVPVKKLVDSEKSKNTIKVSSLQGRVTLILLM
>Cuni_T002132-R1  Name:"Similar to aldh4a1 Delta-1-pyrroline-5-carboxylate dehydrogenase, mitochondrial (Danio rerio)" Cuni1066:270566-310029(-)
MSSYVAVNEPLLDFAKGSKEAAELEQVLKEYEGKTVDVPIVIGDEEIRTPNVRKQVAPFD
HQRVVATFYYATPEIIKKAIATSLKARTEWEKRPLKERCDIFLRAADLISKKYRMSVIAT
TMLGQAKNVYQAEVDAAAELIDFLRFDAMFAQNTTSYQPLSPTPSVTVNSLSYRGLEGFW
AAICPFNFTAIGGHLPVAPAMMGNVSLWKPSDTSVLSNYTVFKIYREAGLPAGVINFVPA
DGPVFGDACLTSPDFAGLNFTGSVVTFKKLWKQIAENLDTYRNYPRIIGECGGKNMHFVH
PSAHVESVVNGTIRSAFEYNGQKCSACSRMYVPQSLWPRIKSGLLGVLKEVKMGSPLDRE
SFVTAVIDEKAFLRIKSYIDHARSSPELTIIAGGKCDDSKGYFIQPTVIETTNPRDMLMQ
EEIFGPVLTVYAYPDAKLDDAIELAQTTSPYALTGAIFVEDKAAREKLIDAFRYCAGNFY
INDKSTGSVVGQQPFGGARLSGTNDKAGGPHYMARFTSPQATKETFSPLTSWRYPSMEK
>Cuni_T002150-R1  Name:"Protein of unknown function" Cuni1066:1133386-1134941(-)
VGSPQLQLTKDQIRIIAEQAGSVWMKLGERLGLPADHLAYFKDSSDNVTEVATNMLTVWQ
EEEQEKDSISAIRDALTDLGLDTVLASLNLS
>Cuni_T002145-R1  Name:"Similar to Sdr16c6 Short-chain dehydrogenase/reductase family 16C member 6 (Mus musculus)" Cuni1066:827737-830408(-)
MVFEKLRSAGALLWRIFVMILHDVFRKIVPAPKKNISSDIILITGGGRGIGRRLALHFAK
FHPKHIILWGRTQKTLAQTARDVQDEGVNCAYMVCDVSAREQVYSL
>Cuni_T002135-R1  Name:"Similar to AGXT Serine--pyruvate aminotransferase, mitochondrial (Callithrix jacchus)" Cuni1066:453551-484071(+)
IMDEVKEGIQYAFQTKNEWTFAISGSGHAAMEAAVANILEPGEIALVGENGIWGQRLADM
VDRNGSIVKPLVRPFGEVFTLEEIEKGLKEHKPALVFVTYGESSGGTRQPLEGLGDLCHK
YNALLLVDSVAILGGYPLFMDDWNIDVLYSGSQKVLSAPPATSPISFSQRARDKIASRKT
RVRSYYFDAKELANYWGCDNEPRRYHHTGFISSIYQLREGLARLAEEGLEKSWEDHRVCS
ELLYEGLEKLGLELLVKDKTIRNPCVTPVKVPQGVNWKDVVDYAMKNYRLELAGGLGDLA
GKVWRIGVMGYNCTPDNIRLTLRVLGEALDSVRK
>Cuni_T002138-R1  Name:"Protein of unknown function" Cuni1066:570898-578105(-)
MQCYTRAHRYPRTTSMYDYRAPPLSAYKKRQFFRPEPDKIGRPWCPDGVKMPAPWEHIKR
IQYNPVNELHREKHMDEMIPFMNKTNWTCGQDMQNFGSRKTKVADSKKYSLQSSYRAHYP
GYWLGIEPRRNPGRFARPGIVPELLSVRPYVKPECHPLIVKPNVPWELPVDDPNVSCGRV
TVPHYILEPYPGPQVPVHLRKEPPKVETVDRMGLVE
>Cuni_T002134-R1  Name:"Similar to MTP9 Metal tolerance protein 9 (Arabidopsis thaliana)" Cuni1066:409719-435758(-)
LFYERQDDLITTFENTATDSKIEIYVENTIDTSALVIRLSQISFAVNLALLIAKAVAVGL
SNSLSIISSLVDSIVDLISGIIIWWTTHAIRTSNVYVYPIGRSRLEPVAIIILSVVMSLA
SLEVVMSAIRRIIDFTSDLDGIAVFELPTILIALSTVVAKFTLAVTFYLLMKKRKLQLPP
VDALIQDHRNDTLSNTIAIICGYLGSQQFADRVHTRKVAYIDPIGAIIIGFYIIISWYKT
GYEHIQHVTGYTADPAFLSEITWISLNHSPKILCLDTVRAVHFGSQYLVEVDIVLREETI
LTESHDIGESLQQKLERLPEVERAFVHVDFDSEHCPRSEHIY
>Cuni_T002149-R1  Name:"Similar to Ttll7 Tubulin polyglutamylase TTLL7 (Mus musculus)" Cuni1066:1088445-1124700(+)
MKHSNSLTSLSSMDKDVYSSSLTHIGRAAPLEHSATHNHSHSKMTEELQLQRRPSYQSKQ
ISEAISSNPHKRRKRHNLITANLCGTRYEVVRRTVEKLGFTIVPDDDPASYLIWNDSFVS
PDRISELKQYQHVNHFPGMVEVTRKDALARNFSKMQKAIPDVYNFIPKTWVLPADYLLLQ
NYAKDMKQKKKNVTFIVKPSNGAQGHGISLFRNAEKIQSSEHYIVQEYIDKPLLLDGYKF
DLRIYVLITHCDPLRIFLYNDGLVRLATEKYMPPQESNIHRLFMHLTNYAVNKRNELYDK
NMAFDTGSKRSIRYFNEYLQRSDIDVGLLWRRIADMIVQTLLVAQPHVLHAYRMCRPGVP
FGSSSVCFEILGFDVMIDRKLRPWLLEVNRSPSLGTDEKLDYEIKSAMLEDTLRLLDIRV
GDKRKNIQAQKAEAQKRLFRLNRKAGILDFTVLNKRSAQNEKRKEELKDLLYKVRKIASK
EEFERRNCGRFRRIFPSDNHEKQDHYCKIMNEAFSVFLAGRGASMQKEIQVNYGNKYKED
EILDMIAECETYERDCGIYPGRKPLFGPKPLQSMPESLPAPSRQDTMDEDIDDIASSINS
RHRSLSSGSGSRSNSRRRKPIGGSSSVPTSGEVKVVGKGQRPFSQPIHGGVGGQDRSRSL
TRAAAASKVILLPRSNAVNTQNMMQKEKENEFTKKTLISLREMRIKFPGKTDEEAELLLD
EINENWKFHKPRIASYWLVKLDTVKRRKVIDIVRHNVRNILQHIWHTADIDSLRLCRIFG
RLFNRLLWSHGQGLWLCFSSKSNVWETMFCKSGENVSDSELECCRRITQLCQDCLLIVYM
FAEEARSSANIAADEQSQQQGDNKYVMPVQTGYVSSHDLKPPINWTPSTKYSQRFLKLYP
TCNHSTS
>Cuni_T002142-R1  Name:"Similar to Putative defense protein 3 (Antheraea mylitta)" Cuni1066:730634-747307(-)
MLLTVTWVLCVTLLKTSWAFPSGAHSNTSNPMEAFSSYCTSGNFRPSHGNILAQSSPAPY
NITVTSPAGNIYKPGQIVTITIEGTKTPNRKSFKGFFLQGDSTQASFAGDITCGDKGKKA
TFCGKSGATHVSAVVKDSIVCQWTPPDFQLGRVQFVATIVANFSTFWTGVKSSSTLLEDP
TTMTYEEKSKQVREQMMRQFQQGASGLGSPAGQSPRAANPFAQMFAMGK
>Cuni_T002139-R1  Name:"Similar to Feeding circuit activating peptides (Aplysia californica)" Cuni1066:688309-688485(+)
GQKRELEALGDYQVHGWKRDEDKRGLDSLGGYLVHGWKRDKKKQGLDSLAGYQVHRWKR
>Cuni_T002148-R1  Name:"Similar to Elovl2 Elongation of very long chain fatty acids protein 2 (Rattus norvegicus)" Cuni1066:1049386-1059875(-)
MASFVKDLIRQYEEAHPHADPRTRNWFLVSDSPYPVWALTILYLTFVALGPTIMRNRKPF
SLQGFMVVYNLGLVALSIYMFVEILLSIWDAGYDLVCAKYNKDSIADPKELRVAKVLWWY
FFSKAIELLDTVCMIARKKFEQVTFLHVFHHASMLNIWWWTMMFIPGGMSWFGSCMNCLV
HVVMYLYYGLSAVPSLRRKLWWKRYITRFQLLQFCITFTHTVNSIRVGCDFPRWGQNLLA
GYMVGMLILFGNFYVQAYIRRSNKDPAISSLETPAAENGSALNGKLQRANGELAEANGHV
ASPSRTKKD
>Cuni_T002152-R1  Name:"Similar to Slc35b3 Adenosine 3'-phospho 5'-phosphosulfate transporter 2 (Mus musculus)" Cuni1066:1184789-1196729(+)
MAQYFAPPEGLRQKVSVFSIKSNSQSGNTVTVKMLEDPSGKETREVLKLWCFDLSYMSRS
WQFMTLTALTFAFYLIYGYMQELIFKLEGFQPFGWYLTLVQFAYYTVFGVAELQLKEDKK
RKIPMSMYLLLAFLTVATMGLSNTSVGYLNYPTQVIFKCCKLIPVLIGGILIQGKKFSLI
DITACLCMSVGLILFTLADSSVSPNFNTYGVVLISLALCADGAIGNVQEKTLKQYGASNG
EMVLYSYGIGFVYILVGLVVSGSLMPAFYFCQEHPVETYGYASIFSITGYLGVYIVLTMV
KSFGAWVTTCRKAVTIVLSFVFFSKPFTFQLLVRQVLVVVLGISLNLYSKNKTSWDCTHC
RIVVV
>Cuni_T002136-R1  Name:"Similar to SLC25A11 Mitochondrial 2-oxoglutarate/malate carrier protein (Homo sapiens)" Cuni1066:515159-542545(-)
MSAPKSEPKTIGNGIKFLFGGTAGMAATVFVQPLDLVKNRMQLSGVGGEKRQYKTSFHAL
ASILKNEGVLGIYTGLSAGLLRQATYTTTRLGIYTSLFDFFSKDGKPPNFLMKALIGVTA
GGAGAFVGTPAEVALIRMTADGRLPVEERRGYKNVFNALGRIVKEEGVLTLWRGCIPTVG
RAMVVNAAQLASYSQAKQILVSTGYFRDGLFLHFVASMISGLITTAASMPVDIAKTRIQN
MKTINGKPEYSGALDVLTKTVRQEGFFSLWKGFTPYYARLGPHTVLTFIFLEQMNQAYRH
YVLHDDSAGGGL
>Cuni_T002137-R1  Name:"Similar to BCO1 Beta,beta-carotene 15,15'-dioxygenase (Homo sapiens)" Cuni1066:547565-565869(+)
MSTKTKQRVPGPEEPSPDNSWPAYFTLDSSATLKDPVQLQIQGTIPKWLTGSLYRNGSGV
FKIGNTQFKHVFDGFAVLSRWTIKDGEVSFQSSVLDTESYRKSQKLNKIAGSAFGTYFPD
PCRTIFNAHATSFFPLPVSAKDNTNVNIIKFADKFFALTESVVLQEVNPKSLLRNETIDI
GESAVLHMGTAHPHVDPDDGNMIYVGTYLANYSKAFKFFRVPAKIPPGETNPFMTAQFIG
SIESRWKIHIGYTHSFGLTKNYIVYFELPTAFNSLKVFTVGMSRDTIESTMKNYPDEPIK
IHILNKITGERIPITYYAPHGFVFHFINCYEEDGCIICDVCLYDSGQVVKDFYLDEILNR
QQNKIPFKGRFGRFVLPLRLNEVKNGENLVALPTSGAKATLRQNDKNVVDVLRDFTFFDD
VYFDLPRINSEYNTRNYRYVYGCSIFNTDLARLVKFDLVTKQVLDWRCGDGHSPGEPVFV
KSPNAEKEDDGVILSTIMARNASESSYLLVLDASTFKEIGRAVVPSSIKVNFSFHGDFYK
NQLSDS
>Cuni_T002154-R1  Name:"Protein of unknown function" Cuni1066:1279679-1280578(+)
MITIVISSTILYHIPPHRTPQICCDKAARNSHTELLTLYYMKVFPPSIDELIMTTTPPET
VTDFHDYEVNEIDPDSQGIYEPAGVFIPPPDYEEEEKTLNFNSEDTDHSDGAEDEKRKPT
KPKVPVKVYEGADLSHYLSEDEVEQEQVLRNDSKAKNTLGKKSKSATQKPKNLFKQNTSN
KNKRKSIGNVPTTNSVRSFSYADSKFGTKGKTITKSLSASNLTDESEIFLSVNSEQSSYE
SFLRSRHGDHVPYESNNGIDGGTEGDSGPSLRYKDDTVWKKLTMRLRHRVSKSLGSKDQ
>Cuni_T002153-R1  Name:"Similar to Slc35b3 Adenosine 3'-phospho 5'-phosphosulfate transporter 2 (Mus musculus)" Cuni1066:1221091-1234544(+)
MAQYFAPPEGLRQKVSVFSIKSNSQSGNTETVKMLEDPSGKETREVLKLWCFDLSYMSRS
WQFMTLTALTFAFYLIYGYMQELIFKLEGFQPFGWYLTLVQFAYYTVFGVAELQLKEDKK
RKIPMSMYLLLAFLTVATMGLSNTSVGYLNYPTQVIFKCCKLIPVLIGGILIQGKKFSLI
DITACLCMSVGLILFTLADSSVSPNFNTYGVVLISLALCADGAIGNVQEKTLKQYGASNG
EMVLYSYGIGFVYILVGLVVSGSLMPAFYFCQEHPVETYGYAVIFSITGYLGLYIVLTMV
KSFGALVAVTVTTCRKAVTIVLSFVFFSKPFTFQYLWSGLVVVLGIYLNLYSKNKTSWDA
HIAGLLHKYGLLKRKRALEPENIV
>Cuni_T002144-R1  Name:"Similar to Sdr16c5 Epidermal retinol dehydrogenase 2 (Mus musculus)" Cuni1066:818120-823415(-)
MIAHNKGHIVAVGSVLGLMGLNGAADYCGSKFATDGFMDALRDELKSEGVSGVTATTIYP
YHVDNDMFAGAATRFPKLFPAINEDYLSQKIVDAVLSGRERMIVPKLLYLSALFYRIAPV
PAITAVMKFIGGHQVIENMKERGHSNTCRG
>Cuni_T002143-R1  Name:"Similar to atad3 ATPase family AAA domain-containing protein 3 (Xenopus tropicalis)" Cuni1066:787177-810823(-)
MSWLFGNKSQPPNVPGFPQVPQPPPPGGPDGGDKRKDSKMEYSFDSSALERAAKAAKELE
NSKHAKDALLLIQEQERAKAIEAQKQIKEYEAHIEQLKLEQVRVAAEERKKLMAEEAKQH
QYKAQYDDQLARKRYEDQLALQARMNEENLRKQEESIKKQEAIRIATMEKEAELRHKHDM
LRIEAEMRGRAKMERENWDITKEQIKLKAAEDRKTKLEAINSYSQVVGMGLTAFLNNWSM
ITAFAGGATLVVGGYYGVKYSFGLVFRAVENRLGKPALVRETSRFTVGSAFKHPIKTVAQ
LVKRPEDPMKGIILKPSLEERLRDIAIATRHTKKNGGYFRNILMHGPPGTGKTMFAKSLA
KHSGMHYAILTGGDVAPLGKEGVTAIHKVFDWAHTSRKGVVLFVDEADAFLRKRSTEHIS
EDMRAALNAFLYRTGEQSQKFMLVLASNQPEQFDWAINDRLDEMVEFQIPSFEERERLVR
HYFQKFILEPAASKSSRLRVAEFDYGKKCAEIAEKTEGLSGREISKLGVAWQARAYASET
GELTEAMIDDIVKDAVEQHKKKVEWQQGASVSDVFYRSSRVMPIGLPPIPAIMESPAKTT
VQTEASAPSQPTGGGHST
>Cuni_T002133-R1  Name:"Similar to Atp13a3 Probable cation-transporting ATPase 13A3 (Mus musculus)" Cuni1066:319198-367640(+)
MDKSNGKLHYSLKQSQENGKLNPSNQFQAQFQDSRTPQSSLLKAQCILNKGTDEELICWG
YRDSASKKFFFGLLVVFSLGTLLLIVHWKPELTCYLQRKLCPLYKAQYVLLKTSFGIVSV
VKIQTMTEHLDNQNLGTDAEPAVSVSNSDFSDDRTKLSLSWTTGHQAGSLRYFDYQHTRY
IWDQYKSSFRKLEDLSTGTPCFVLHEKFTGFSDQQRAARSRLYGPNTMEIQVPSYWTLFI
GEVLNPFYIFQIASIILWAIDEYYYYASCIFLISGISIGISLRETKKQRVTLKNMVATEE
GTVKVCLDTQEFVDKLDRELVPGDLISIPPNGCVMTCDAVLTAGTCIVNESMLTGESVPV
TKTPLLQQEDEELYSPETHKRHTLFSGTRIVQTRYYGQAKVTAVVIRTGFNTAKGELVRA
ILFPKPLDFKFYRDAMRFILCLAVIASMGMAYSLANYILMKEHVERTVLRVLDIVTIIVP
PALPAAMTVGTVYAQNRLKKSRIFCISPPRINFCGRINVFCFDKTGTLTEDGLDLWGVVP
VHKHRFQQPLPNPTALSRGPLLVCMAACHSLTIIDGQLSGDPLDLIMFNAINWYIEEPGS
DTQKYDTIMPTIVKPYTSETFLAEE
>Cuni_T002146-R1  Name:"Similar to ARHGEF10 Rho guanine nucleotide exchange factor 10 (Homo sapiens)" Cuni1066:858509-892576(+)
DEVLLDDRGYDIDDTPDKPLPPKPGKKGFFLRTRVASNDSASQDDSGSCLPVTINLQKHP
HPALPPQPVGLTQNQIKRRLVIESIISSERSYLDSLERLVKDYEKTLLEFIPQPKSHVRR
VFSKMREIIGHHKMFQIELSERVKLWDEEEKIGDIFTASFSKTMLINAYSVYVNNFAAAM
DEVRLLQRARQIFQDFLQKQEKNSADRLSIFGLMVKPVQRFPQFIMFLQDLIKLTPQSHD
DRRALQLALTELENVAYRLNERKRQIQHVLDTWNLDVDHKRRLIRTDSVEQMHGDMDNLK
CKDRRLILMNDHVLCVKVIHKEISGFEVERYALRWVDKLKDLELKDTSITCGVQSILGRE
SGRIPVSQQLGESEDDPFHLLADLHDISHDHEIIKQMSALASRLRRSYAGHGLREELIHE
ISNDLQQMIQVKEEQLRLVNSCTVVLEDTARLDKPHRVLQMATPALKLDWCIDFLMAKLA
SDKSNNLAWDGTSGSDGGDFDVVPAYFLKQIPVDVPKNYTSIKCAVSVYLNSKRSASGLG
LQHLWVCSSTPAHGQVSILSVHNSKPALVESFRACGSDILAVELVPGCGQVTQPGKLLFA
EDTVWMATSQNEILIFPLTSEDGVRRQPLTSIPASHTTVSIKFVDEQFFCGSTAGILTIF
TREPDGSWNISSPTALSVGTASVKLHFVYQQYMWVSCGSRLSQLEIDSLQVESVSVLQVS
DESNIDHVVKSGVGIWVSFCGHSVIKLFHLETMENLQEISVGNFVSRIITEKSWTITGGS
ENLAVTALAVSRGFLWIGTSCGVMLTVPLPRLSDGVPLYRGSPKLSLHAHKGPVLEMKRA
SSLLSTIETRQSHRNLERKRLELETLHQRMRNTGIDESVEITNVENLNVLESDSNQKVLS
RFSNSVNENDQAKTVGLSGTGENFGLNVPVSNRQSFIDKNESWTTVDDSSVQLRNKRRSS
ESYRRSKTLSPSLDLVHRNMLKSKVYSQSHLDLNSAEPSEVGILYRALLDDLSSGQEFRY
VGESGTNKFMGEKSRRWSNRVSSQMSNISTPSWLMTSSSSSSGPASHSSSQESRHDLPVP
KIESQAESTGGITESHRDHSTSGVSRLTESGTADRKHFSKPSSNAVIVVSGGDGYCDLDM
ARRETKMDDACVLMWIHKFY
>Cuni_T002147-R1  Name:"Similar to ROR1 Inactive tyrosine-protein kinase transmembrane receptor ROR1 (Homo sapiens)" Cuni1066:1008479-1008721(+)
MFILLLPRSSRPGNKQGQPVELSPLNPKSTTRAKEFPMQNIRFLQELGEGAFGKVYKGEL
TGLHRESSVTKVAIKTLKENA
>Cuni_T020898-R1  Name:"Similar to ART2 Putative uncharacterized protein ART2 (Saccharomyces cerevisiae (strain ATCC 204508 / S288c))" Cuni1067:80353-80703(+)
MIGRADIEGSKSNVAMNAWLPQASYPCGNFSGTSSLKFRGTKGSIGHTFMVCIHTENQNQ
GDFCPFALLEISVLHESPLGHLRYGLTDVPPQPNSPPDNVSTRIGPRRTLTLEVGL
>Cuni_T020897-R1  Name:"Protein of unknown function" Cuni1067:181-5294(+)
MAGFGDKHRRVPITEKFGKQLFHYNTPRVPEYSRAHPIIPRLYVPEWKTDMQNRTSFLEN
AHLGNIPTFEHDENLFLEKREQMHYNVENWTRVSEKIYVPPRAELLRPDFHHETSRYQSE
LMMRRDENAV
>Cuni_T020899-R1  Name:"Protein of unknown function" Cuni1067:95637-96533(-)
MSALSNRSAGVASMTLRAASGKPKCLGSGGSMVAKLKLKGIDGRAPPGVEPAA
>Cuni_T018510-R1  Name:"Similar to RPL38 60S ribosomal protein L38 (Branchiostoma belcheri)" Cuni1068:308805-309016(-)
ITPKQIQEIKDFLPTARKKNVKSVIIKRNNVKFKVRCSRYVYTLVIEDREKTEKLRLSLP
PGLAVIELK
>Cuni_T018508-R1  Name:"Similar to CCND2 G1/S-specific cyclin-D2 (Sus scrofa)" Cuni1068:114586-123741(+)
MEQHLSLLCCETDVTGKTKRALLDPVLLNDNRVLANLLATEDKYLPHTCYFNCVQTDIQP
YMRKMVTEWMAEVCSEHKMEEEVFPLSVNYLDRFLSIKDIKRTRLQLLGAGCMFLASKLK
ETTPISGEQLVIYTDNSITLEDLTDMESWILLLLKWDLSAVVPNDFLDHVLHRMPFNKYD
AHIIKRRAQTIAALCATDCKFMQTPPSMIACSAIACALKHLKPHSETDLASLHHITGIDM
DLIRSCVEQVDQTVRACMASAAQTDQHVSKHEEQKQEQPTTPTDVRDINILGVDNTVSSS
QAAQPYVY
>Cuni_T018509-R1  Name:"Similar to ccr4 Glucose-repressible alcohol dehydrogenase transcriptional effector (Schizosaccharomyces pombe (strain 972 / ATCC 24843))" Cuni1068:255354-274658(-)
MGRVTRRSVASKDESTPKESPKSAGKRGAKKEESAIDKAAGGDTQETPTRRSGRQPAKEG
PKADGPARGKSASRGRSASRGGKAKKEEEPESKEKSEDEEVEEKLPKGGSRSRSRGKAGQ
EVKATNAVKGGRGTKTKDKSEKDEENVEEEGETVKETEEDEPAVKGRGGRARSKTTAAAV
APSPRTERKGRGKAATAEQESDEKGDDSVKSKKDEAEASTAADNETDATPKGRQRRGANK
DSVDTPTSSSGRRGRGQKAESAPPVKTTPASGKSTRRRGAAEAVADETVEKTEEMETGEE
EKATPAEGAVEKKAASTTDEATTEKEEHNTEKAITEKDKKAASENEAPTTEEAAMETQES
SATEKAAYKEQTATEKAAVDASNTAAVEASEPVSPAKKRKLEDDETEPSELESPNKKRKL
EGSDGSPVAKRVKADTTAPAEVSTEEDFIVVNKEDVPSPDSKEVLASLPPQVKEGSSDPP
GSEDITDEPAAETVAARTVSLSDIDISGLKDDDETAVMETSIKPPTDDFGVSSGGPAISA
DSGAAEQVSGATEKVKLSSDDTNASQDGALVQDTVTPTAAAEPASAHANSTSEAAPVVPQ
DTLAAPQTFPAVDSSQPEAMEVDGEVSLGKTASNFTDHSAVHQNGTDEEPSIVNSDTHLT
SSPDKVQAAVRKDYVPSSTAIDSRKFILNPTFPVEMMDPAYCFSVVSYNILADCHLCRGD
YSYTQPQYLAPEFRHNLLLKELDYLDGDIVCLQEVSPKFYNDALLPAMKSKGYEGHLIKR
TKEYWDEGEATFVKTSKFDLVSNESASLADLAFKKVESCGLSAEVTSAAKKYLDRADVIL
LTELRCKKTGKTLTVCNIHVVYDPKAPDVQCIQVALAVNQLVTKAGSDQNPHIICGDFNA
DASSPAYQLARDGYLSDDHIRKLQALQALSNTDGSSQALIHHLWAAFQHTSSTLKNAYEQ
TLGKEPPVTVYTKEGRSADHIFFSSASIDNVGVLETLDLEVLQASGGLPSKSIPSDHVSI
KAGFRLK
>Cuni_T019902-R1  Name:"Protein of unknown function" Cuni1069:84127-96150(+)
MKLYPVLLVAVIVTLYFIPDTHGRPAPEVIPKQKYGPSKKLRFKQLMDWIVSLDDDSSDT
DALRESLATLTVITDLQGRNGSGSPITDISPISHCVQACFGNTTSVSVSVLHECNRQCML
SPHRFDHPGNATNHSRNSGSGASRRP
>Cuni_T019903-R1  Name:"Protein of unknown function" Cuni1069:133608-146699(+)
MPGEAGAIGQQVDLPDQTLLRLLQTFNVNISEPLFWCVLMMFVFEPFHRCVIVGQGRFRN
VMTHHLGTKLTFRIYCILSISYSVLTFFLFQKAVNSQPRMRDLQRNEALLVGYVFALAGF
IIKAHIHMTSSIASIMGGQYFGIDVPRKTAFPGPSDRYYHPLGTSSVMCYFGLSVIRASA
AGILTTIILGVSTILASQLERCYHETGAKAKLQQRASTGVPGSLGDGDRRAD
>Cuni_T006515-R1  Name:"Similar to tll1 Tolloid-like protein 1 (Xenopus laevis)" Cuni107:403707-420437(+)
CGRTLQKSAGTFYHRSRPGEPDSCVWRLSAKQRETIALNITRLNITMSPNCAGDYLEVRD
GHYFKSPLLGRYCGDQIPPTLKSTGRRMWVNYATRNGGYNSFAASYEASCGGEFFGSGTI
ASPDYPDEYLPGKKCSWKITVKKEFIVVLEFKSFQLQDHKNCEYDYVAVYDGPTEASPLL
GKYCGDRKPETIKSCDNTMYVKFVSDLSTQKAGFSATFVPEPP
>Cuni_T006518-R1  Name:"Similar to Ift140 Intraflagellar transport protein 140 homolog (Mus musculus)" Cuni107:471257-536971(+)
MAVHFDHRLDTDDGGITTKIGWLKSSPILAVLSYGEEIGGSVVLYNEEGEKLPHKPITHQ
CHPTSFAWHPTRKILAVGWETGEITLWNEQDKELIETPHLHRSEVTVMHWSSNGTRLLTA
DISGVLIGWKSDSKGRLGQDPFQHHVQEPITQIILKPVSPQDPAMDISSLAKAAVSGDES
ALDMFIWKRGGKNKMASSFGPQESMSFFIGGASGGVYYLSEQGRCVQCFSVDTLVRKLLF
YETKNVLVTITEGLMLTQHAVFGEGDTKEILKVKLSGRSENPTFIWAGKGILATATGEAV
VRMWDLDHDDNYVLTLEGNTGYDRNEAIMSLAYNENSMVLAGGTNMGNIALWKYSPPAGN
RKVDSEDLWKLQAPATIDGPARQIEWSHSRGLMAVNTFASVYILCEQVMNFSYKDQTAAV
QYGPGAVSIEIFSASVHHDLKTEIQIKGICTTKDTVAVWNGKRIVVYEFAGDKSTVKAAG
SFATDAMVIRLYEQSVYAIEQNKVQVRTFQGTVKQLITFAESEGHPVSLDICGSYLVVAT
DAGVLRVYDLSRREAKAHSSPKNIAEVISGFGGVISAKVNCAGSRVSIQVMSVDGKPDPR
MYFWDVEMDAVQYFNFETGRGEQDDYPVQGELPETDDYDTNDAERGKNQAAKDIAGRYPF
AHYWDPAEPKFCVCEAWILPNITDQSPKKTHSLTKIIEEGPVEVMVVSLFCTPENGVLIQ
DSFPLSPDFGRLIGVEVPYYYFTKKNGNNPENQQTDNGVSNAETGTPSHSTLVARKIMQD
FVGLENSDKGTQEAMMNFSFYLTIGNMDEAFKAIKLIKSESVWENMAKMCVKNRRLDVAS
VCLGNMGHARGAKALREALKEPELDARVAVLAVQLGLYEDAERLLKNCKRYDLLNEFYQN
RGNWLKALQTAEMYDRIHRRTTFYNYARHLEDQGDTQNAIPNYEKSETHKFEVPRMLIDD
PDQLEDYISKSKDKTLRRWWAQYMESTENMDTAIQFYESAQDFFSLVRVYCYCNNMEKAA
EVCNETGDKAACYYLARQYENQEHIKEAIHFFQRAGAYGSSIRLCKEHGFEDQLLNLALM
GRPEDMIEAARYYEAKQGSQDKAVMLYHKAGNYSKALELAFTTKQFGALQLISGDLDERA
DPELLQRCADFFMENEQYDKAVDLLAIGRKYWEAVSICNEQTVEITEDLAEKLTPDKDFN
MDPVARNKILEAIGEVCMHQGAYHLATKKFTQAGNKIKAMKALLKSGDTEKIVFFAGVSR
QKEIYVMAANYLQSLDWRKDPEIMKNIIAFYTKGRALDALASFYDACAQVEIDEYQNYDK
ALGALGEAYKCLSKAKQDDPMMQEEKLEALKHKMANIKKFAMARRVYPENPEEAIKQCQS
LLEEKNIDTDVRIGDIYGFLIEHYASTQRWKAAHTHLKELQSRLPGVQLGYYVNMATVEA
IHSALSLPMDKSLRSEHINGFRMGAGDHEGEPGEFVDEEVIEDMHTGGIG
>Cuni_T006520-R1  Name:"Similar to PAQR3 Progestin and adipoQ receptor family member 3 (Homo sapiens)" Cuni107:576749-588559(-)
MSWLNFEENGITEKCLKTPASSSSSSSSSYILDHVQRDSYHLLDIEIDEHAVKACKTGLC
YQDTTELALLKYHELPDFMKGNPYVVQGYRTMLPFSMCLRSLLLWTNETVNIWSHFLGFY
IFLLIALYDNLVVLPQIEGSFSDHIILTLGLACYMFCMLCSAGFHTFCCHSEKASRRWLA
VDMTGVSMGIIGCYLPSVHYAFYCQSMWRNIYLLIITVLSVCALVFQLHPRFFTHGWFYI
RVAIYVALSAYGVVPTIHWVYLSGGISTTIVQMFLPKVIMMYLLGALAFSFYISKLPERA
CPGKFDYIGSSHQLWHFLIVLAFCYWHQAGEEILRHRISNKCIE
>Cuni_T006525-R1  Name:"Protein of unknown function" Cuni107:824742-827061(+)
MFVAPSTVLYTNCPGAPSLEALASDAELEELSKKLLANSEGLRLQVVEKDGHYFTLNNTR
LQVCQWMETRGQCRTVRIETVPLKSVPDGIKRMMTVPPSFRVPVPVAGKCTIYVAAVLLI
TCGTRYN
>Cuni_T006521-R1  Name:"Similar to Tmem94 Transmembrane protein 94 (Mus musculus)" Cuni107:612172-618300(+)
MTGLTTSEALQKLHAEIDELLSSHEEELRRTYWKRFICRMQDKASCFTPLSFLWIFGMAV
LLVVAASMEDVDKFPSGSRMWLITEAVFLLASIVLNIVLLCLKMRKEHGKHIALKRKLLN
LLQEASSRQNWRPDHFPDKHIPLSPCISLQWCIRDGVVVNMPQPLLVLGDVVVMRPGHAA
PGKCRAVTEDGELQAGENYFPEPPQAKGQGPQPRLPMSTKKFVLEETPIVKNF
>Cuni_T006514-R1  Name:"Similar to tll1 Tolloid-like protein 1 (Xenopus laevis)" Cuni107:293922-347132(+)
VCGGEFVDSGMITSPNYPAEYPPGKKCSWKITVKEEFIVVLRFKYFKVQKHRNCTYDYVA
VYDGPTEASPLLGKHCGNRKPKPIKSSGNTMYVKFVSDESRQKVGFSASFVPASCGGEFV
GSGVIASPDFPAEYLPGKNCSWKITVKEGFIVVLEFRFFQ
>Cuni_T006524-R1  Name:"Similar to PGBD4 PiggyBac transposable element-derived protein 4 (Homo sapiens)" Cuni107:734079-734348(-)
MEQKLKKGEVSSKSAACLLAIKWCNKQEVWMLTTCHNSGMVATEKIDRKTGLNIVKPQCV
VDYSKCMGSVDCTEMLLSSIESIRKTVKW
>Cuni_T006523-R1  Name:"Similar to Myoglobin (Haliotis madaka)" Cuni107:695045-724645(+)
MFCDALTMYYKIKSLPAYFEPWNELASSLPDLIREKKLRDAVAELPLLDHNQLREYSEWR
LAHLQLSLITAGYVWQNGDKGVTQVLPKSLAYPFFNISSQLGLQPVLSHADLALANWSII
DQNGPYDFENLECLYHLPGGKAADWFCMVTFMVELSFAKCMQSIVRILELLGSAGNLSAG
VARHEEQTETEVSQCLQQVSTAMNTMQDSLARMRDNLEANVFFNVIRPFLSGWGGDTNPL
PEGLIYEGISDTPVKLTGGSAAQSTTLQVLDALLGIKHIQDKREFLVRMREFMPPEHKHL
IEYIEQLPYTLRDFVTSSSNQVVKAAYNHAISTLTELRDYHIQIVKMYVVLPAKKANEGN
YESLDNKGTGGTSLIPFLKDIWADTRERLLADNQTSLNASDGHSSVAGLTVLAALAAAAV
ILGFSAVSALRR
>Cuni_T006517-R1  Name:"Similar to TM9SF3 Transmembrane 9 superfamily member 3 (Homo sapiens)" Cuni107:455370-465609(-)
MSQKSFFSLICILLICIVCCDEHDHIYKEGDEVVLWMNTVGPYHNRQETYSYFSLPFCRG
QKAGISHYHETLGEALLGVELEFSGIDIDFKGDFSHTEYCTVDLDEEKYQAFVYAVRNHY
WYQMYIDDLPIWGIVGEIEDGGEGFYIWTHKKFDIGYNGPYIVDVNLTSEAKVKLKPGIK
IPFSYE
>Cuni_T006516-R1  Name:"Similar to TM9SF3 Transmembrane 9 superfamily member 3 (Homo sapiens)" Cuni107:436408-451741(-)
IHWFSIFNSFMMVIFLVGLVSMILMRTLRKDYARYSREEDLDDMEKDLGDEYGWKQVHGD
VFRPASHALLFSAFIGTGYHIAVVTLCVILFTIVGELYTERGSLLSTAIFVYAATAPVNG
YFGGSLYARMGGKLWIKQMVVSAFLMPAVVCGTAFFINFIAIYYHASRAIPFITMVAVTC
ICIFVILPLTLVGTVLGRNLAGQPDYPCRINAVPRPIPEKKWFMEPAVITLAGGVLPFGS
IFIEMYFIFTSFWAYKIYYVYGFMLLVFLILAVVTVCVTIVCTYFLLNAEDYRWQWTSFM
AAASTSGYVYLYSFYYFFFKTKMYGLFQTAFYFGYMAMFSLALGVMCGTVGYVGTSIFVR
KIYSTVKID
>Cuni_T006513-R1  Name:"Similar to TLL1 Tolloid-like protein 1 (Homo sapiens)" Cuni107:200174-211872(+)
SCGGEFFGSGTIASPDYPAEYLPGKKCSWKITVKKEFIVVLEFESFQVGLQFYLSNLQNH
INCEYDYVAVYDGPTEASPLLGKYCGDRKPETIKSCDNTLYVKFVSDQSGQKAGFSATFV
Q
>Cuni_T006522-R1  Name:"Similar to Tmem94 Transmembrane protein 94 (Mus musculus)" Cuni107:667776-670573(+)
ISIEPLFPQVCACRPVMSRPWSEDEPTPVELASKLLSLPCPLLFRRQDKFKLVQLIMESR
HYIFAMRNCFYLLLSCLLAVVLAQLVCCLLLLPPALTVQHVLWLVVVVVPALSLSLMANP
NEARTVGMATHKNINHINKQIIVEFFVQFCTRFLPSIIVAVVSFAVVLHSFCESIPTGKC
LLYDF
>Cuni_T006519-R1  Name:"Similar to PEF1 Peflin (Homo sapiens)" Cuni107:549339-565447(+)
MSWSGQQQYGYGQGNVYQQSDQRQPAPGQYGTPSYGAPAGQRPAFQDPQSYGSQQFQTSG
YGSAPQQGYGASPQQGYGTSPQQGYGATPQQSYGASPQQGYGGGPPHQTYGSQHISGPAG
NYGSGGAQFFSGAPPGVDPELWTWFQAVDADHSGKITANELQQALLNGNWSPFNAETCRL
MIGMFDRDRNGSIDIHEFAALWKYIQDWKACFDRFDTDRSGNIDANELSNAFKTFGYQLS
PQFSQLVVRVFDRNRGGYSINFDDFIQACVMLKTLTDKFRVKDVSQNGQIRISYEEFLEM
ALDTTIIK
>Cuni_T006512-R1  Name:"Similar to tll1 Dorsal-ventral patterning tolloid-like protein 1 (Danio rerio)" Cuni107:34586-77325(+)
LVVSTTGDTVRHRTQENFSSDPCTSICDFSLLLSDQSLSKLLAYLFPSTTREAYRQQLQI
AATFLLKMLEENAAGFISPCQQQNKDQCRLEKSEQRKEIKKICEKLRWIKMQMIHFKEKY
FEQQNVMGELQLAGKYSFRINTTKQTVSGNQTSLNSSYQWTHTRKNESTKSGSKGKRAAL
ASKTRLWNYGVIPYVIDGIFSVRNKELFEQAMRHWEKYTCITFKEKEPEDQDYILFTQTA
CGCCSYVGNTGTGAHAVSIGPGCNQFGIVLHELGHTIGFWHEHARPDRDHYVKIIYTNIE
PGVESNFEKKPFGEVNSLGELYDFGSIMHYSLNSFGHNKSLDTIVPRWTSMTYHVPEIGQ
RKRLSPGDIRQTNKLYRCPKCGRTLQKSADTFYHRSNPGEPDSCVWRLSANQGETIALSI
TRLNIAVSANCAGDYLEVRDGHYFKSPLLGRFCGHQIPATLKSTGRRMWVNYATRNGGYN
GFAASYKAACGGERFDSGTITTPNFPAEYLPGKKCSWKITAREGLIVVLRFTFFQLENHI
NCAYDYVAVYDGPTEAWPLLGKYCGYRKLKPIKSNGNTLYVKFVSDQLYQKAGFSATFVQ
>Cuni_T013707-R1  Name:"Similar to PEG3 Paternally-expressed gene 3 protein (Bos taurus)" Cuni1070:93687-94877(-)
MKMFKVPFLVKTETLNSSAKKLSDCSNNFQQPDCSNNLQQPDCSNNFQQPGCSNNLQQPG
RSNNLQQPGFSNNLQQPDCSNNLQQPGRSNNLQQPGRSNNLQQPGFSNNFQQPDCSNNLQ
QPGCSNNLQQPGRSNNLQQPDCSNNLQQPDCSNNLQQPGCSNNLQQPDCSNNLQQPGCSN
NLQQPGRSNNLQQPGRSNNLQQPGCSNNLQQPGFSNNLQQPDCSNNLQQPDCFNNFQQPD
CSNNLQQPDCSNNLQQPGFSNNLQQPDCSNNFQQPDCSNNLQQPDCSNNLQQPDCSNNLQ
QPDCSNNLQQPGFSNNLQQPDCSNNLQQPGCFNNA
>Cuni_T013710-R1  Name:"Similar to Mettl5 rRNA N6-adenosine-methyltransferase METTL5 (Mus musculus)" Cuni1070:222582-231457(-)
MANSVKVMKRKELEAYLQDVEVFENPKVKLEQYPTTPHIAACMLHTICCTYDDLTDKSVV
DLGVGCGVLSIGATMLGARYVLGVDIDEDALDTCSRNLQDFEIHTVDLLAADVRHLANPL
NCHLHKRFDTAVLNPPFGTKHNQGIDIEFLKAALALSRHCVYSLHKTSTREHILKKASDW
GVEAKVIAELRFDLANTLKFHKKTAVDIEVDFIRLQHKTDGRTV
>Cuni_T013711-R1  Name:"Protein of unknown function" Cuni1070:295765-296164(-)
MNWMTTARALSYLAGFVFTLFVPPISVRCHDNNVVPFSDMNKTLRDHIRKQRFLKHVLHQ
LRGSETPLKNSTSSAGPSQRAAFSWLVPDTDYGSNTPSSQHSHNSTNMVNRPVPDKGLTS
LASLSPPNLVFSE
>Cuni_T013708-R1  Name:"Similar to Upf1 Regulator of nonsense transcripts 1 (Mus musculus)" Cuni1070:111103-184292(-)
MNVEAYGPNSQTLTFLETEENDLLGADTQGSEFDFTDFTLPSQTQSQTQHSHHQDDDNSG
LNHNKNHVLQINGVDHILENGVIDTKVSAISHGVGELNFEEEPDENQFYLKDLPVHACTY
CGIHDPACVVFCNATKKWFCNGRGNTSGSHIINHLVRAKAKEVTLHKDGPLGETVLECYN
CGCRNVFLLGFIPAKAESVVVLLCRTPCANLSTLKDMNWDPSQWQPLINDRSFLSWLVKM
PSEQEQLRARQITAQQINKLEELWKDNPDAKLEDLERTGLDEEPTQVQLRYDDAYQYQNI
FGPLVKLEADYDKRLKESQTQDNIVVRWDTGLNKKRIAYFCLSKANDEMKLMHGDELKLR
YAGELQKPWSSVGHVIKIPDNHSDEVAIELRMQSALKTFAVDETSVWGYIYHKLLGHEVE
DIALKCTLPKRFSAPGLPELNHSQVYAVKTVLQRPLSLIQGPPGTGKTVTSATVVYHLVK
QNNGPVLVCAPSNIAVDQLTEKIHKTGLKVVRLCAKSREAIDSPVSFLALHNQIRSLDTV
PELNKLQQLKDETGELSSGDEKRYRSLKKQCEKELLQAADVICCTCVGAGDPRLARLQFS
SVLIDESTQATEPECMIPVVLGCRQLILVGDHCQLGPVVMCKKAARAGLSQSLFERLVVL
GIRPIRLQVQYRMHPALSNFPSNIFYEGSLQNGVTAADRTGAGLDFPWPQPDKPMFFYST
FGTEEISSSGTSYLNRTEAANIEKLATKLLRAGVKPQQIGIITPYEGQRAYQVQHMQYNG
SLNKKLYLEIEVASVDAFQGREKDFILLSCVRSNEHQGIGFLNDPRRLNVALTRARYGVI
IVGNPKILSRQSLWCHLLTFYRDQKCLVEGPLSSLKECFVNISKPRKLVNTTNPGGRFMS
NTMFDARELLVPGSAYDRANNSYREPVLHTHDQLGFIGPDRAYTRSAMNIPVPVNMFLPH
PVPPQFNHGRSQQGNAKNRWSGSRQQKSGKNSVTSNSQSQASQDFSQGPLTQGNTASQHF
QMSQGLSGLSQPGLSGLSQAELSQDSFMADDYRSQMDVLLSQDSTYQGDRLYLASQLSQG
PFN
>Cuni_T013705-R1  Name:"Similar to Chsy1 Chondroitin sulfate synthase 1 (Mus musculus)" Cuni1070:26208-27068(-)
MSGLSPGTMQNKAQVNGASRQSLALKRSRAVGAEACFPSVLIAVFGFICGMIIVNWCKAN
IMSPCNVHGLCCKEERLRQVTQAANVIDDNEYGNTDGRDNFIFVGIMTAKKFIDNRGLAS
HRTWASTINGKVVFFSSEGSTSGYGVPVVALPGVDDHYPPQKKSFMMLKYMHDHFLDKYE
WFLRADDDVFIKGDKLDQFLRGINSSQPLFIGQAGTGKADELGKLALSAEENFCMGGPGM
IFSRETLRRMAPHISYCLRNLYTSHEDVEIGRCVRKFAGIQCTWSYE
>Cuni_T013706-R1  Name:"Similar to rpl13 60S ribosomal protein L13 (Danio rerio)" Cuni1070:32934-33517(-)
MASKRNNIIPNGHFHKDWQRMVKTWFNQPLRKKRNHAACAKKAAAIAAQPVTGLLRPIVR
CPTFKYDTKIRFGRVNKKVARTIGISVDYHRRSMSIESLQQNLQRTKEYKTKLIIFPPKE
GKPVLPLEIRFKPEKARLPTEDERNHNSCVALRQARINAKLVV
>Cuni_T013709-R1  Name:"Similar to Fuom Fucose mutarotase (Mus musculus)" Cuni1070:195471-208310(-)
MPLKGIPRQLSPDLLKVLAEMGHGDEIILADAHFPTTSICSKGPIQVRADGLGAAVLLKG
IVQLFPLDQYVDYPVARMDLVPSDKVKGLPTPIWDQYKLILETAENKEVQIELVERFDFY
ERAKKAYAIVHTGETEQYSNIILKKGLVLD
>Cuni_T020833-R1  Name:"Similar to Gbs-76A Glycogen-binding subunit 76A (Drosophila melanogaster)" Cuni1071:236127-238421(-)
MYFCPCSCDDPIDPETEENSFFTLPRNLSYVQDSYLDRYSVSARFVHNPKIERCIQHQQD
REWKANVEAETLGLLSTITAQELSGRCDGGFDTLSSSTFDFSRVDTSPSEAVVSSSSGHF
TAGWSEGQSSSSCFTASSFFHPASVVASKISAFLHSPPNESMASARDIGTSVDGDSLPLM
SEASAKVGPLFVECSRYSGDDMDRDSVLENCASHTVLRSSPTELAGQVVGTTVKGEHDNN
FEDSEIAISSGNFDDDLLDDTDSNSSDAHSVPRTNMQEIYNAKENPVFTSSFESNDFWSQ
KPDHIGEKIRFPTKNTSSDSENQEMMSESNSQFRSLRDPSLTPLNVSRKDNFSEGDITSR
MYEDGSCGNVLSIGVSALCGSPDSDAFSEEGVFVNTDDLDSTHEKSTTVSDASDDTFISA
DSMFMSPDEGELEDEDDSGKEPVGKMSIQEAISRAASDLNKISLGIYGSSHSTSLSSITT
SNSSLSDAGTDLRFPPRIEKSPGRSSPVRTHPGLKIQIDESCLGSQSLLTDSSLTLTESP
VYPDEEFNFSRVQLRKSSSLKSNKTPPGTPHRKKVVRFADAMGLDLESVRHVLNMESPPK
IPASALADLMRGLEEDNSEVGSKYLCPCFSQPGAAGNFITRILNQKVCLENAIINDLTIT
GFVRVANIAFHKAVRIRYTHNGWSSFYDIAASYVQNSCDGPTDRFSFSIVAPPYFGPGSR
LEFAVCYIAEGVEYWDNNEGRNYIFECFAKSIPMDSETAWLHFL
>Cuni_T020831-R1  Name:"Protein of unknown function" Cuni1071:35575-35725(-)
QQMRSISYALSTQLRVTLPPLPCSHKKLLQFAGRSINDLSNYACRVAKQH
>Cuni_T020834-R1  Name:"Similar to htr1a-B 5-hydroxytryptamine receptor 1A-beta (Takifugu rubripes)" Cuni1071:298656-300029(-)
MATHACLSTTDQPDYKAQGYSRQTFLVAWARTVPLVFLAFSTVVFNLMILWMFKVKRSLR
SCKNIYLASLAIADLLIGLCMFLAIVQQLKGHVKWLPMFSCRLYLVLRQSALYVSLLSLV
LITGDRWWSIHYPFSYRSKRSTRNAFVAVGCVWVFAFALHVPPVTLWDLNKTFESSNLTA
ADFNLEDQALITCELPFVDSVLFVSIVSAVIYFIPLMAVLSLNCSLYVGILQRKRVQIRR
SVSASDKLTWLDRRTSVSSIPDFASMTDENMHLLNGTNSRRGQMRLNSKRRNSADVVLLR
SSAPSPLFNNMNSGRRFSWAPRKNYLVRPSKCGEELAKNLLVKQDRKAAFWLGLLVAVFL
VCWLPHTIVGILQSGKQANVPQWTKDVTFWLLLANSAINPLMYGLFNREIRRAFKQWLCG
GSGRKWRARNALLLYGVSLTTAVAVPKRISSFEAVPE
>Cuni_T020832-R1  Name:"Similar to NDUFA6 NADH dehydrogenase [ubiquinone] 1 alpha subcomplex subunit 6 (Pongo pygmaeus)" Cuni1071:123889-124244(+)
MVAKKLVEQGLKHVKQILSVDRAEARRRIPYTVKDFYIPITIEQGRAKVGEMFLKNKNVT
DIWIIDMLVIKGQMELVETANLWKQPNHVMMKPKPTDFLCKFYEGQE
>Cuni_T012143-R1  Name:"Similar to EIF5A Eukaryotic translation initiation factor 5A-1 (Oryctolagus cuniculus)" Cuni1072:281349-281746(+)
MLITRRPLRGADAGASQTYPMQCSSLRKNGYVIVKGRPCKIVEMSTSKTGKYGHAKVHMI
GIDLLTNKKYEDICPSTHKMSVLDDGGFLCLMSDIGEAPEDLKCPEGDIGQEIRERSERD
E
>Cuni_T012138-R1  Name:"Similar to STX5 Syntaxin-5 (Bos taurus)" Cuni1072:44543-60168(-)
MIARRRRTNSGSDSQQQQQQNLPTTGQQHHHQQYYNSGTRQQSPPLLPVSSQHLTDPDMT
CRDRSTEFLSVVKSLQSRQGNGVIQNNRNRALHVRSEFTQIAKRIGKDLANTFAKLEKLT
ILAKRKALFDDKPVEIQELTYIIKQDINSLNEQIAQLQQLAKSQKANNGKHMQTHSNTVV
VTLQSKLASMSNDFRQVLEVRTENLKHQKSRREQFSSSPITSSLPPSAYQGHMNGSVLLQ
DEANHAGNGEVTIDMGASSRGQVQNQMQIIDEQDAYIQSRAETMQNIETTIVELGTIFQQ
LAHMVKEQEEIVGRIDTNVEEASENIEAAHTEILKYFQSVTSNRWLMIKIFGVLMVFFII
FVIFMA
>Cuni_T012140-R1  Name:"Similar to cygb1 Cytoglobin-1 (Oryzias latipes)" Cuni1072:126890-184894(+)
MAEGASINSGGGGDTRGSHQPPTPDPRLPLTAMQIFKLKKNWKGVKRRLDDTGVEMLIRL
FRLEPSTQAQFRDIRHLDTEEQLRTSEELEKHGGAMMASLDEIVNNIENVDEALEKMSQV
AQQHRQIQGFTAEQFLLMEQPFLDAIRIILEDRFTDNMDTIYRILIKFILDHLVKAAS
>Cuni_T012142-R1  Name:"Similar to PTK7 Inactive tyrosine-protein kinase 7 (Gallus gallus)" Cuni1072:242933-277813(-)
LDDITSQSFEPRLLPSYPIVIPVQERFEIKVFPPSGRPDPDYRWVDRNDRTIGDTGRIHV
QGNNLVFESPQEVDSGNYTFVANNTSGEKKQSVWVIVSVPPIISRVPQPMTVDEDGSASF
SCQVAGTPYPVTTILWMKDGVPLPMGSKFFQINPKEGTLVIPTVRGSDAGNYVCVANTTG
HPVKLSSPANLRVSRKLKFDPQPDEVYYLELDKVASIKCHAEALTPPLIQWLKVNNGLKL
PDHMYEERGTLYFVKVRREDEGKYMCVATHRQQGYINATVTVRIVEKPFFSTRPPNMTTA
FEGQPMRLHCVAAGDPKPQIVWDKDGRILPTTDPAATSNSRYLVFPNGTLLVQKVLIEDK
GKYGCTANNSAGKIRTELTLLITQPIEEDEGFDMAKTVIIAVCSAGAYLALVIGLTAYCS
YRLLMQRKTRKQLLNAKNMKLGAGEFQHHREQHELLMKDRDSGLQFRSDSDNRSHVSGMS
SNPSHSSTSASGAASHITASAAAAAAARCRSTSLDKFIFPRQDLHTLGIIGKGKFGDVFL
AKARAIRPHEPETLVVVKSLLTKGEAISTEFHAEMDMYSKMEHSNIVRLLGVCREAEPFF
MITEYCDWGDLKQFLVAMRSDNGRRAPTARLPTISALQKMKMCQQVALGMEYLSGCKFIH
RDLAARNVLLSSRMELKVSSLSLLRDAYATEYFSHPTRPTPIPLRWLPPEAIKDGEFSLH
TDIWSFGIFVWEVFHLCDLPYRLHSDDEIFKSMCGNGAAANSLPRLDFAEYCPTPVMDLV
MQCCTMPASSRPVFSDLAVRLGQLLTNGESV
>Cuni_T012141-R1  Name:"Similar to RTRAF RNA transcription, translation and transport factor protein (Mus musculus)" Cuni1072:204537-217304(+)
MFKRKFVALDFPNPESFDITDENKFHYVVLWLEDQKIRHFKIEDREPLRSATGDRWNDAL
KQYLAQLNCPYDVSDRRALLDWLLAYAVRLEFGDDTEKYKNVTPEKLQQRSSQKPLHSTN
PLDNLDFESAEFKAGVTSLAMLLQIPPHHDHIDLLKAVCVLVSEKFSQEALDAAQRQKNV
KDEHIPLEKTELGFEAGDYIMTEAAKILRLLHIRDLRDLQTKINSAIVAVQKITADPKTD
SRLGKVGF
>Cuni_T012139-R1  Name:"Similar to MTR Methionine synthase (Bos taurus)" Cuni1072:65246-99666(+)
MAPTLESPEEPLKPDIFQVINETLQKRIMVFDGGMGTMIQRERLDEDDFRGDLFKNHPKA
LKGNNDLLSMTRPAVIKQIHKDYLEAGADFIETNTFSGTSVAQADYGLEHIVYRLNKESA
EVAKQACEEVAQKTGIPRYVAGAMGPTNRTLSISPSVEQPELRNITFDQLVDAYAEQARG
LLDGGSDVLLVETIFDTANAKAALFAIETVFESGYHRVPVFVSGTIVDKSGRTLSGQTTE
AFIISVSHSQPMCLGLNCALGAAEMRPFIESISKNTEAFVLCYPNAGLPNTFGEYDETPE
VTASQVKEFMKDGLVNIVGGCCGTTPAHIKAIADLAKHYKPRIPPANLHAGHLCLAGLEP
FYVTPETNFVNIGERCNVAGSKMFCRLIKNREFEKALAVAKTQVENGAQVLDINMDEGML
DGISAMTTFVNLIASEPEIARVPLCIDSSNFSVIEAGLKCSQGKCIVNSISLKEGEVDFL
KKAKTVKRFGAAVVVMAFDEEGQATDSERKVAICTRSYNLLTQKLGYNPNDIIFDPNILT
IATGIEEHNEYGITFIEATAIIKKTLPGARVSGGVSNFSFSFRGMEAVREAMHTVFLYHA
IKVGFVPGMDMGIVNAGALPLYDDIEPELLQLCENLLWNKDPEGTEKLLAYAQNMKQGGK
KNAAQEDEWRQKSVEERLSYSLIKGIDKYVVEDTEEARQNSVLYPRPLNVIEGPLMKGMS
IVGDLFGVGKMFLPQVIKSARVMKKAVGHLIPFMERERQAMMLASGLPADTEPSYQGTVV
IATVKGDVHDIGKNIVAVVLGCNNF
>Cuni_T012243-R1  Name:"Similar to ZFC3H1 Zinc finger C3H1 domain-containing protein (Homo sapiens)" Cuni1073:91765-134282(+)
MALEKLLMFASQWQGSKQPIVTGTIKDFKRQKQLPVLSDKRAVQHFSQKSAARRPIAQEK
AAGDKQSCQLQDNYEEVEMDIDSGNECEEIGDSLPGQDVNQVMPQFYHNTETQGLLGAVQ
HSLPVSTGVPYLPSHFLTPPVIHFAEILQPPPLTVPPLPPAPPPPPPPLPPAATYELEWN
GMQERQIEVVDHKVILGKREPQNLIYCDTTPADYSGQQESVQGAADVIPQPHRSHPARMN
NSCPNVTSSLDDDIARWLRLIRQNQDSSSPNLPDFSVHMFADQRFVVDNRQRQMSSNLLP
SADYSNSSEDILTADPRSELYSSLPTRNSSQQLPDSDSFHKRSTLTHSPSVSSHRSQLGE
GDTYLTYDSPSEVENNRPVSPRHRGRLPRNDLGTCLSPVQSVPLGRSVSFSRRHSLGEHA
RSHRDISPQSDPRKSLSQSQSKHDFQYSSPHSEPSRPLSQSQSKHDSQYSSPQCSVVRQY
PRGHVKDKASASSDYLSPHRLIEASGHRSSPPQPQVQKRRNHSTDKSDVYEPQVPATKKL
KRASPPPYIPTSIKPARTFTSVYIPQHDSLETSDSEEEDPIALRNKLLAEVIEKRKSLAE
RYNLQRQSLSLETNRQRQSLSPETNKQRQSLSPETNKQRQSLSPETNKQRQSLSPETNKQ
RQSLSPETNRQRQSLSPETNKQRQSLSPETNKQRQSLSPETNKQRQSQSPETKTDDQIPQ
EMLCSTAAHAALSVLDRDESDLVINVSSSSWNNSKINVSEDPQVSSGESLLSAALGNSVS
AHGISSSHVTSSMSSSITAQPPPILGGVIQTAGASSSGVCSGQSPLVFSKPSALSDLSAQ
TPADSNSSSAATITKASPVTSEPEAGRQSNLACGSDQRLHFLSATTAHNVDTAATEEHKT
PARNLNSQNSERKPDLGPGSKLQQDYDISSAASGISVLRSDSVSNQHGAVHALPVHPKVL
VPMNSSSDSDGESHEEDNSQTSAARAGHGGKEKTNKKAATELLGKQEQLLSAHEQSIQKD
QKMVKQLVRRAVKFLEAQQQEEQKRQSLHRQLLDLSREMKKTEKLVMMFKAEKEKTEKQV
QLVTETLLQKKKQYERKARSVMSLGCKLLGPSYVSRFRKPYVTLPSVSLYALTVPEKQNL
SRAQHIAQEKLKLIEKEKQIAEKLRKLKEAQGEKDTEMPSSVKHVPDLLKSVQPKWKSQD
VIRIESDAQPDVPSMKQRRKSLLDMNMTHSSSLSSAEKEYLSETKVEMKQQDQFADLSST
FRMPGGTQLANFCKLQHSSLSPSLSTVNFLSSALTGKLLVSAVTSKLLVFRCYKFNSFFR
TKENLSLQSSTYSHKINPNSVLCPYDLQGTCNDDSCTQLHPRDYKLSDHELLEEIVSYCP
KLAGAADGASPEEVHKCI
>Cuni_T012246-R1  Name:"Protein of unknown function" Cuni1073:204260-204667(+)
MADQNLLTLSWEWEGKGRGGGGSERFYHRQVSRSQDRERRCRTLMMCWYRRCRTLMMCWY
RRCRTLTMCWYRRCRTLMMCWYRRCRTLTMCWYRRCRTLTMCWYRRCRTLTMCWYRRCRT
LTMCWYRRCRTLTMC
>Cuni_T012242-R1  Name:"Similar to Nt5e 5'-nucleotidase (Mus musculus)" Cuni1073:3713-44917(+)
NVTFVEELAAVQGEIDKLVAQGVNIIIALGHSGFAVDLHLAAHLKHVDIVVGGHTNTFLY
NAPSTEVPADLYPTLVLNVHDQRQVLVVQDYAYGKYLGELHVTFNDLGDVIRWSGNPVLL
DNSVAKDKETEQLLQSYLPQVDKMKRTIVGRAQVELNADRVLCRTTECNLGNMVTDSFVH
QHLQHMDVDSWASVGIAVVNAGSFRASINKGDITIEDVVFVQPFRNTVSVMEILGQTLLD
MLEYGASKWTQNRDEAFGGFLQVSGLQITYDIGRPVGERVVEVLALCTKCPVPKLEPLIP
QKAYNVLASSFIINGGDGYHMLPASTIRVVDI
>Cuni_T012251-R1  Name:"Similar to wrn Werner syndrome ATP-dependent helicase homolog (Xenopus laevis)" Cuni1073:472506-472820(+)
MQLLTFPGTVVYSCHFADCAGICDDILTSLSSLDPVVGFDMEWPVTFVKGKTPKTALIQL
CLSEAVCYLFHVSAMTSFPTALRKLLCDARVVLVGLNVEADLGL
>Cuni_T012250-R1  Name:"Similar to HKR1 Signaling mucin HKR1 (Saccharomyces cerevisiae (strain ATCC 204508 / S288c))" Cuni1073:410983-412787(+)
STHVRLVSTYVRLVSTHVRLVSTHVRLVSTHVRLVSTYVRLVSTHVRLVSTHVRLVSTHV
RLVSTHVRLVSTHVRLVSTHVRLVSTHVRLVSTYVRLVSTDVRLVSTHVRLVSTHVRLVS
THVRLVSTYVMLVSTHVRLVSTHVRLVSTHVRLVSVHVRLVSAHIRLVSTYVRLVSTYVR
LMSTHVRLVSTYVRLVFTYVRLVSTHVRLVSTHVRLVSTHVRLVSTHVRLVSTHVRLVST
HVRLVSTHVRLVSTYVRLVSTHVRLVSTHVRLVSTHVRLVSTHVRLVSTQVRLVSTQVRL
VSTHVRLVPTHVRLVSTHVRLVSTHVRLVSTHVRLVSTHVRLVSTYVRLVSTHVRLVSTH
VRLVSTHVRLVSTHVRLVSTYVMLVSTYVRLMSTHVRLVSNHVRLVSTYVRLVSTHVRLV
STHVRLVSTHVRLVSTHVRLVSTYVRLVSTHVRLVSTHVRLVSTHVRLVSTHVRLVSTHV
RLVSTYVRLVSTHVRLVSTHVRLVSTHVRLVSTHVRLVSTHVRLVSTHVRLVSAHVRLVS
THVRLVSTYGG
>Cuni_T012249-R1  Name:"Similar to RpS4 40S ribosomal protein S4 (Ixodes scapularis)" Cuni1073:394058-410281(-)
MGYRGRRKSLKRVTAPKSWMLDKTGGVFAPKCSPGPHKSRESFPMTLFLRNRLKYALSYQ
EVKKIVKQRLIKVDGKVRTDHTYPTGFMDVVSIDRTNENFRILYDVKGRFVVHRIKPEEA
KYKLCRVRRNGTGQKNVPYLTTHDGRTIRYPDPLVKVNDTIMVDIASGKMKEFIKFDTGN
LVMITGGHNLGRVGTIINRERHPGSFDIVHVKDALGHTFATRLSYVFVIGKGNKPWISLP
RGKGVKLTIAEERDRRLAAKTQ
>Cuni_T012245-R1  Name:"Similar to ZFC3H1 Zinc finger C3H1 domain-containing protein (Homo sapiens)" Cuni1073:156143-184765(+)
MVLGLKKPDSSIWNVTERLTSADLLVLWMSYIYVLEWHQLPPMYSWANQNPGRLLAKESI
SLPWSLKSSLCSTLGHLVKLHNKAALVWHKSLKDEETTVYYVKLIESQVSLLKSQNRPED
ALATCRHVLKDSNLVDVWLLLADLCASVDDKDMVKRIFTEALSANRQSPKLQYYLSEVAL
NNLQQFALGHFDVSSRNFLPHDCCQLYSQLLKQEEAFTLRKAPLKEGLADGLTRDVYMWL
CYSLLVELQLQDKTEDVLEVLESSLTHAQTPSDLTLVWQHYIFYLARRGSSLKDIQEMVM
RSLISMPVKFPVPFSSLPSATWVDYYHSNRLVEAWLSVLSPEDSLDLMEMSLSFMPNNVQ
LLLRAIELSLGQRMTRRAYSWCRYVAAQRDRPANLAFWKLATALAQVEGTPREVENLLVA
SVETMPLAVSAWKD
>Cuni_T012244-R1  Name:"Similar to KRTAP16-1 Keratin-associated protein 16-1 (Homo sapiens)" Cuni1073:135772-136422(+)
PTTGISYSTQPTTGISYSTQPTTGISYSTQPTTGISYSTQPTTGISYSTQPTTGISYSTQ
PTTGISYSTQPTTGISYSTQPTTGISYSTQPTTGISYSTQPTTGISYSTQPTTGISYSTQ
PTTGICYSTQPTTGISYSTQPTTGISYSTQPTTGISFSTQPTTGISYSTQPTTGISYSTQ
PTTGISYSTQPTTGISYSTQPTTGKSYSTQPTTGIS
>Cuni_T012247-R1  Name:"Similar to U-actitoxin-Avd3h (Anemonia viridis)" Cuni1073:238265-246442(-)
MEKCAMSEWGDWSECSNPCGDGTKERRRMLKNPSVTADMCDEQLDESQSCTGDCRDTRRK
KLRDNFVMRHDEQRDPTDMCAVTGWSDWSPCSATCGLGMKERWRMFLHGTEKRKNCGMHL
MEKDLCRGEIFDCQKAMMMKNFTAICQLTADVGPCRGDFPRWFYNSNVQKCQVFAYGGCR
GNDNKFNTEEECVNLCAEHMGE
>Cuni_T012248-R1  Name:"Similar to SPON1 Spondin-1 (Gallus gallus)" Cuni1073:256143-263703(-)
SDRIRTVIKTKQLWGPEAILDTVRAVFTANKDKHLLSLITMIGPSPDWCLGVSALSMCAS
NCTWLDSASIDLYPWDAGTDSRRTYL
>Cuni_T014623-R1  Name:"Similar to CBFA2T3 Protein CBFA2T3 (Homo sapiens)" Cuni1074:283389-314639(-)
YRECVMPGNPESKGDSLHMTSPKISNLVEMVPAVRSLSANGFPPEFKASYQTVSRDCPSP
ASVASLMKSSNTHLPPTSGSRQLSKLKRFLTTLQQFGSDISPQIGERVRSLVLGLVNSHL
SIEDFHAKLQQATNFPLKPFVIPFLKANLPLLQRELFYCARLAKQSPQQFLTQNEHMMFS
PVQSPVSLQESLVLQVNENGKRRLSDSGPYEDRSDLETPAKRYHCNQCSSPGSAGGQSPD
SVFSVSVGASCRLQDISKSCGSREHDRGGAEVEADRERQFQTSMCLRRTEVFDHCERFSD
DWQHIESLLGCILSMVDKTKRAVSVLRDRSLQDREDVSLWSQHQALSAGEEPVMRALRHS
GDVVCDVRKRADDVVVDVRRQAMLELQRAVTSADKKAADLVMAETFRMERAVADVRAQVQ
SKLLQSVYPQEESAESCWNCGRKASETCSGCNMARYCGSFCQHKDWDKHHHVCGRAHVSS
TVDLRPMPRTTSSKTSMVARLGSGTKGQQTLPSKEFSAVDHSSYSSASPQPSAVPCLSAK
DEAQTTTAPATVSSTQRSTSPGVSASTGTPSPASSNPDNSATEADTSITSQTLSETSAA
>Cuni_T014622-R1  Name:"Similar to SERPINB5 Serpin B5 (Homo sapiens)" Cuni1074:270138-275150(+)
MEHERISLKPELLAAGNILLVDTMVVRAEWQDKFSRHKTHKRQFASMDPNSTGIMVDAMT
GVLTVGWKRDEELKVDVVEIPLKGAELGFYIVLPHETQGVLDVDKQLLASSRTIAYLASE
LVPTAVHLEIPKFRLHRVLYLKKILQNMGIVLAFSAETADFSSIISL
>Cuni_T014619-R1  Name:"Similar to CCDC113 Coiled-coil domain-containing protein 113 (Homo sapiens)" Cuni1074:155809-174534(+)
MEKGSSHSHSSVDSYGSLNDLTEDELHKMIQETLQANTVLEAETFMFERHLARIEQKEGI
KDSGPPSTQSISVRDPSYRKRSRSLMASTDRSQRLTAEQKCDIAQKEIEALKTSIIKVDE
ESEKSLDYYKAIMEEAEINLSELKKEYYEFERDVLKGALHPRTNKIIAEKCLRFFEDKIK
ARDLLIEKFRLKNAALKIQMKKMKQQLKQKAEMGEVLNEVDFNQLKIENEQYLEKIDERN
QDLLRLKLMTGNTLQVLNSYKQRLQTLTKEAVKLQNDLALREDLQQKILAETKMVEAERA
QAEKVNKKLRKNLTDFRIPDVMEYVHGKADIYDLQKKIKNWERKVDIAELALSTHTKAWK
VLQLQVQRKHDWQDV
>Cuni_T014620-R1  Name:"Protein of unknown function" Cuni1074:180649-190073(-)
MYLHYQITRLARDQKNHLTRRLCRDSNWPFTGDLSSDEMVCMLDSYFGKRRTPSCIPPRC
PYDRLYHNTIGWNQSAIKDTRQNFKECQFSANQEDKQRSVVVCANATYGHYLDRFTDFMF
KDHGRVQTCKAFYSHGKISTLPPIEDLNHTHDS
>Cuni_T014617-R1  Name:"Protein of unknown function" Cuni1074:104836-120941(-)
RPTHIQPPPDRWLFPMRGISSILSQPGRLLMRTPPSDGHLGTIAGGSVYTPCSVDSKNAS
LTPISVPRPIHLHKSE
>Cuni_T014621-R1  Name:"Similar to SERPINB10 Serpin B10 (Callithrix jacchus)" Cuni1074:225660-246746(+)
LVMHGLEGGVYYLDPLLAFAHRSDLIFLKSVSGLIPRREVPDVLLENGDFTPDRIRRYIL
HRTNNKIDVQVAPDSLKPDTILVVSTMVVQAEWQTLFYQQRTYQHPFQSLKEHGYLEAKV
DMMTDVRIVPWKQDHQLGVTVAALPLKDKDLLFIIVLPLGSHGFADVEQAILKENDVLDT
IFGGLEPTLVRLGIPRFRINTTFYMREGLQSLGMVQAFDPNLADFSKLSNATLMNDKLYL
SDIVHAAAIEVNEEGVSPSSAASPIQLGHPFGMVPPDYSFIADHPFLFFIRHTVVGKTLL
SGKYLGP
>Cuni_T014618-R1  Name:"Protein of unknown function" Cuni1074:132544-142121(-)
TLEFQKSHQRRLLRRFKEKLKVFELQINEVRDVIMQAKAMEREYIKVKAENDYLKLLLSK
KLADNHCNM
>Cuni_T013405-R1  Name:"Similar to FMRFaR FMRFamide receptor (Drosophila melanogaster)" Cuni1075:187640-198573(-)
MTTPPELMSSSLGDIGLNFDLVRNSTAALQERTMADDLHFVMSAIVGPIICLFGMVGNLM
SIITWCRPGMRSSTGRYLIGQAVADFAVLLLFLVVDSAQQWNPNLKFSLCYGIFFSYIGY
PCFFLAIVVSIWITVGVTIDRYIMVCWITKSKKFCSETRANVGLILIAVNSFLVNLPHFA
SFTVVYPDYGGGGGGNSSSSSSPSTEPQPTFKMTEFGAGSGGQFYEFWIHCIILILIPWV
SVLSLNIMIINKINKSNKRMENKKTRESMKKSKQSENQITRLLLAVSFSFLFFIGLQCII
QCFAMQKPPWADMQMVSASFAFGKLGIVFNSSLNFVLYCLTGRRFRVELLNMLGCSKGDR
LQTSSRDNSVSGSSSVSTKISTTSTISGTSGI
>Cuni_T013403-R1  Name:"Similar to Ripor1 Rho family-interacting cell polarization regulator 1 (Mus musculus)" Cuni1075:30174-72215(-)
MTRILYTPNHGGDNRLLYSISQGSKSNSIPSLDTCYNINTSSPTTTTTSNNNSKGVLNHN
HLYHHHYLQNQQHHFSSSSSNIMSLRDTPGRGGAPVSRSHSFGGVSIASNMSSTSTTPSV
LGETIKRSARIYTKPQSGSRSFRKSPKIPKVPRPSKALMVFDCVKRGIGEFIQATHEDIA
QLMASESATSTAQGRLHETDKQIKAAERYLKRLEFHLAKIDELHDCYLLNQQLREGARNM
ARAYSATSSQSRKDSLANVKYGYKECSQTMCAIEAQLENMLGTFSCRLKGMAGFARLVPG
DVFEVVIKHGGQKWKTKGRIEKNNTQRWDSPEYTFKCLVGETLNIKASEVRAFKSVQLGQ
KNCEVCQPSTHDTSSQGLFSAFPQLMTVSINVHGSLKLSIIITWNPLDGMDEAVTYFEPP
ARPSGSASRRRPMSMIATNGSLFGSNSDLSSGSERKFPSPMQSLKQRDDSGIYGSATSLP
SHTTQDSRQSHSLSASPIMHGHRDPSWTPDLHSNRLRPHSPEGVASSSSSSSSVFTSSSL
SGPVPEVTQSMVPGVVVQAEMVSHDATVSVEEALGSLTTTLEDFLGHYPELQKLEEMVQV
IESLVRKKSARGSRSSSMSVSIEGAIEEAFDFLNTEDGLDDLDEEDENEEEENLDSSKMT
PQVSNIDKFIMSPESTAKTSDSGIESLAKRLQEDTHLGSSVGSSPVPPSSGNEQVDQALV
FHLTYCDKLLENLGNYGPLKCREFYALDHLQKQAQVLEKLVEIAKAGTEVDLHAVLAAET
PDKALRELWMLCVDQTPLYVHPEKIIHVMEQKFGANLSEHHGVKSSRVFCQLMARVLDVP
SYIPELGHTSIVTLHQFMLYFQDGSGLTKLDRMAEELCLLDRLNANSSDIVIKAILTLRE
DLPPPACLKMLTKLLVGNTRETQQSATSYLKIISRDKAQRDKAMVVLVEGLEDHIAEVRA
GCCVALTIIEAEESIEQLVHVCQSDSSSTVRRKAKEALYSFGEVGRQAFEEAQLSSQGFQ
GLQVRKL
>Cuni_T013404-R1  Name:"Similar to Rsph14 Radial spoke head 14 homolog (Mus musculus)" Cuni1075:127213-146014(-)
MAFTVISAKYPTNVDPTRTPLAYGDRAIPRLNRELKDENVIVRQRAVMALSDYLHDPEHI
ADALRLGLGETLKICLSDSDFTVRWKAVECLCTMAAYAIGRDSFLKLETIYPVANLFEDR
KDIVRKYAHMCLLRISETPPGAASIVEAQLILPLVEKLQKELDEIKELILDTLHFCIQED
IPSALEARAMQVITMLLKHDLAVIRGKAARDIMDLSVSLEGKNMAVECGAVQLLRHMLVD
QSAEVRAKAAGALMMIAITTKGKYTAIHSLAIKPLTDLVDDINSEVRLNAIKALTCIAEA
PEGRRELLQYTNKIRNHEKDAIAAVAKAAHIAVKVITWLP
>Cuni_T013406-R1  Name:"Similar to USH1C Harmonin (Homo sapiens)" Cuni1075:218281-267547(-)
VKELIASDADREQLFSSLKLYQSNQDLYQLLADLRLLLNEPSKLELYDYMRPLILLQHQI
EYSRKTPTAPGVKLRSVRLQRHHGEGLGFAVRGGFEHGVGIFVTDVTPGSQADRQGLRVG
DEVVRVNGFTIAEAIHDDVLNLIRSRDEILLKVTYIGMLPVKQETTSPVTWRYVDSLDDD
SEEKRRPQDIKIFIDSTGHASLGCSILRDKDSNKPGIFVEKVRPRSIADQVGLEPGDQIL
EVNDTNFRRISWEQAVLALKSSRQLNIVIRKHAAVSRNPAFKVPSTFPAFSTSPPIPTES
PPSLTNSSKSSASSNALEELDWDFNLPST
>Cuni_T012110-R1  Name:"Similar to Pcolce Procollagen C-endopeptidase enhancer 1 (Mus musculus)" Cuni1076:128-27721(+)
MAKILKLLHLFLGVSLNRFHATPYSIVPGENDKTLDRLTAERCAQACLEETTFVCRSFDY
QIKDGSCMLSKKSGSDVGQLFNQGLVQVHHFEMKPALDCGGIITGVSGDFASPGWPRNYS
HHLNCTWTIRVPEHQVIMFTFIHFELGVRAGNPCLNRNDRLRITEMTPLGEVTLCASPPM
TTYISQSNVVTFNFNTNDHGDAQGFKVAFKGDWPCRAVLRSDRGQLASPQWPEQYSPGLS
CAWTIQAPENGKITLKFTNIDLDGQGFGACTDLHDYLDRDRDCLTSLANHRIPPLSRFCK
HESPAVLLSTSDALLVILRTDAYMQRTGFHASYDFILPTTIAPPTTTTTRGPESLSARFV
EPRYEREGANLNYSRDQLNFG
>Cuni_T012114-R1  Name:"Protein of unknown function" Cuni1076:270824-271312(+)
MGLLPLHSRHGIITIVLQTRDYYHCTPDLGLLPLYSRQGIITIVLQTLDYYHCTPDKGLL
PLHSRHGIITIALQTWDCYHCTPDMGLLPLYSRHGIITIALQTWDFYHCTPDMGLLPLYS
RQGIITIVLQTRDYYHCTPNMELLLLCSRHGIINTVIQTWDY
>Cuni_T012111-R1  Name:"Similar to NR5A2 Nuclear receptor subfamily 5 group A member 2 (Gallus gallus)" Cuni1076:52592-77478(-)
MIETIEILDLIESASPERSNDGQRGFLGVGKNNNNPGQQHRLAAPAGSSSHVVLQEMDEV
SSKDDPDANSLLDMDYKDIKLGLDEEQCPVCGDRVSGYHYGLLTCESCKGFFKRTVQNKK
VYSCVDNRSCQIDKSQRKRCPYCRFQKCLTVGMKLEAVRSDRMRGGRNKFGPMYKRDRAL
KQQAARHGHALPGSDLPLVPNGMLDVGSPGSPEDVKPDPHVLQNSLNMYVGAVSNSATSN
LIPGLVPGPACLSASAAAPTSSASITTSAGGHMVSSSPPPAHPHQTQHHHQQPPHRLVPI
SAQDFTQNFVHITAVPQSPLSPKTYYLQPHRNHHHQQQQQHHHHKGNSIMERADSSPPAC
HQPQHTQALPDFLVSHNQSLGRNSQQRHGNNLLGPGIPDREPSYPSVIEALRCYQASMIS
GQTDRPVVSPLISEIKATLLDEAEVKHKMVTFMQNELLQTDIASPEQFLPVLCRMVDQLL
FLMVEWARSSMFFKEIKVEDQMKLLHNSWSEILILDFIYRQVHNVWGKEIVTPSGDVIGL
DILDELGLGDVRAKVFELVKKGRELKLDLTEYMCLKFIILLNPDVSGLENRTYIEQSQEK
VTAALLEYCRLVYPNVSDKYSQLLMRLPEIRLISIRTEDFLYFKHLSNEVPDQTLLTEML
HAKRG
>Cuni_T012115-R1  Name:"Protein of unknown function" Cuni1076:277172-281082(+)
MGIMSRNARLPERPKPPSWQEISEDVSSAQQDNEDVAFVVGCEYLRTTTAAASCPPVLER
SPNNSLHSPEVDSLDQGSPSIDADAVKTSKSNVHKLISLYTELNDSLGSLQKQYTHLKLV
QGELSQSMSELNVLAQSVSSDVENQSGGSVSGKTSSKAKSKQKKKK
>Cuni_T012116-R1  Name:"Protein of unknown function" Cuni1076:285936-286107(-)
KLICKLPAQSVTQGAGSLQSPGQPLSLSGQLLSFPSYQPLIGNLTVNLLNSDSLLGT
>Cuni_T012112-R1  Name:"Similar to C3 Complement C3 (Fragment) (Eptatretus burgeri)" Cuni1076:118688-188550(+)
MAKVAVGVSDIKERTATSTFVYLVVETVGHKPYFQKEAQLLVNESPGYIFIQTDKPIYTP
DQAVYTRVMTLNEHFRPVSWPVQLDIQNPDGMTISRKVIDSTNMLANDIIKIPENPVYGN
WTVTAKFTNGVSYVLYANVLKSSRTFVIMYILLPVFSVSFHIPEEKKVVLLSQTLFNLAI
GAKYTYGKPVKGHVSVTFGLLWHGHVFTVGKRRNLQLNDTGFTECSISTEELRLPVQSVW
FPNGGKLHLQASVTEAASGRTEKGEDVSVVFSDHLYVVKFTRSSKFFKPGLPYVLEIDVF
KANGEYGSHLPLNVECKADTRTVLPATYWTSELGLRTDARGKLAVHYHIPGSAKSLLFKV
TPTFAAKEETSSSDYFISVGPFFSPSSVYLHIHAALTDVESRGEMPKVGDQLTVTTRYTN
ADDIHTVNLVVIARGQIVWQVSTRNIQGNLTTFHFKLTQEMTPGARILAFSVLGNQQGSE
VVSDSVWIDVLPQCDGEVSVHHEDDRRTVFRPGDIGTVTFSGPPNTVIGVIAVDSAVYHL
KNSTLTRQSVFQQIRDHDRGCGCGSGRDTGKIFQNAGLTVLTNAGLEMETKLVEGCLDKA
VRKKRSLESEKQIKEVCCLEGLKVYNATLAMCYELSRVLKKTLISDLCAKEFFACCRDTA
KGTVTLDVAGRFKKFEDRVAEELELTFEEEILETANIPVRSNFPESWWFEEYNLGPEGKA
DVDFVLPDSITTWSIQTLGMSQETGLCVAPPMEIPTFSSFFVHLDLPYSATRLEQVEIRA
TVYNYMHRKLRVNVVLQSMDGICYSGQPGQKTEAVKLEIEPNDAASAYFPIIPLEIGDFP
IRVMAVSSWGRDAVEKTLRVEGEGLEKIHTISVMLDPSGKRFLRSGSSNHSFSVKNEVRV
EEKRQSVELDLNLPQEVIPDTDSCTVHAMGVAELLRMPTGCGEQNLIYLAPNVYVTRYLR
STRRLSAVIEKKATILIRQGVARQMTFRKPDASYATWPHADSSTWLTAFAMKTLCQAEHY
ITIDHNQTCESFHWIAQQQNLDGSFKEETWVTHREMLGGINGDVSHAAYILTALLECACQ
GENQKEIIDRSQGYIEANIGQTDRPLAVALSAYALTLAGSPHSDTLVKRLMSMAKSSTR
>Cuni_T012113-R1  Name:"Similar to SCAI Protein SCAI (Homo sapiens)" Cuni1076:238851-253251(-)
MLQTLEREPQDDLSNQIYDNSPAPGKTPFENGERTNKRDNPHKYLLYKPTYGQLNTFLAS
AFKELPPNGAMLLYISADGCLGNQKHTDDAAYDLGGVITNSRREGEEPSKAKKTELYKEI
HCLHPGDLYPYTRKPLFLIIDSSNSSAFQLLTCLATVVCLLSPEQIPATVDQQLKGNLFT
LFLHCPLMAMCCVCNIADVPITLWDKCQTQMDKFVADASKLFSRARKLDHAYVQFLGDDF
LRLLLLRFVFCYIVLILHKGFKGPSYYPASHPALPTDEILEHPALYKLVLDLATSLEVRS
LFAEPGDVDISA
>Cuni_T002512-R1  Name:"Protein of unknown function" Cuni1077:250977-253764(+)
YRIFDEDVMGAEVSTNESSPYHNGPTSPAASGGSRRFHPGDVPESPASSSGASAQQRPAD
TPRSTGKHVLQANGLSEAKPPVDHTKSQSAKSQSASGVSPGKANDATRSSKK
>Cuni_T002513-R1  Name:"Similar to Ano1 Anoctamin-1 (Mus musculus)" Cuni1077:270568-311035(-)
MFTGQVMGSLPNCDHNKHDEVEDDDRLFRDGRRRIDFILAWSNELGKKRQQTFKSRAVFE
TNLIEEGLQLEYTVTKNRISYVKIHAPYKVLKRYADILKLRLPIKAVNHLCLIRHAADSY
LIPLDWYLIQNKKGPKDMLVKLKHKLLKPFQYNKKKLPSITRSYTCPYSSNKEYLFDIPE
KPEHLFNSATRSWIVDYILRRKYFADTTENSFACGINKMVSDKIYTAAYPLHEGDWQGPD
ENPRKILFDCWASWRNCFKLQPIDHIRVYFGETIALYFAWLGFYTSMLIPATVVGFAVFV
FSLYSMATDSTSKELCNPAYNITMCPLCDGRCGYWKLSSACLRANISRIFDNGSTVFFAV
FMSLWGTFFLEFWKREQATIQYKWDLTSFVEEEQPPRPEYLSRLENCDTMRVNPVTGMTE
PYLPFWRMRFPRYFTSYSIMLLMTVFALSVFVAVIAYKVVLFTTLSLLTDSVTSVSSVQL
FKDNASLLTTVMTAVVNLIVILILNFFYGYLAFWLTDWEYLRTQSEYDNSITLKLFVFQF
INCFSSIYYIAFFKGQFIGRPGRYRTIFGNRLEECDPAGCLIELCIQLAIIMVGRQLIQN
NLQETVLPKMIKFIKMKMRRQTQEQKLAAEPWEKDYLLEPAREMSLFYEYLEMVMQFGFL
TIFCAAFPLGPVFALMNNIVEIRVDANKFVTQLQRPVAVKSASIGVWYSVLYAISRIAII
TN
>Cuni_T002507-R1  Name:"Similar to TPH1 Tryptophan 5-hydroxylase 1 (Gallus gallus)" Cuni1077:3189-16413(+)
GIVFTELMKLYPTHACREYLANIPLLVEHCGYRSDNVPQLEDVSRFLKERTGFTLRPVAG
YLSSRDFLAGLAFRVFHCTQYIRHRSDPFYTPEPDCCHELMGHVPLLADSSFAQFSQEIG
LASLGATDNDIAKLSTCYFFSVEFGLCKQEDELRAFGAGLLSSISELSHALTDKAVKKVF
EPLHTCTQECLITTFQDVYFYTDSFEEAKEKMRQFASTIKRPFAVRYNPYTETVDVLDST
RCIATVVSELKGDLCIVSDALKRLQLMESFKFQD
>Cuni_T002515-R1  Name:"Protein of unknown function" Cuni1077:341648-343968(-)
MAKRLMKFVQAKLEPIWAQQTTKTAFVIVGTVLGVGIFFFPAFKSMWDAKHAKEYEIYNK
DHLYPLQIRKQREQREKEDQQKI
>Cuni_T002516-R1  Name:"Protein of unknown function" Cuni1077:358878-361872(-)
MLRLVSGKGYVFCPGFPEKFVVGKACGKFVVLHKVPFKRYQSTHCLVYYKGQGNQQIRVN
SSLCALCPRCLQAAKSIFALPNFSADASTATVHMPLQLENHRQPKSEQKTITCSNNTTDV
AIPLRGEKSSANQLAADHMNGLSSQRDCLGSTDSSFSSEPHNRANFSSKHHISELDVNGN
TEAAGSLSDLDRRSKDSNRHSNVDAKIQVLTQVLTNLMQVQCQQKSVDVNLRVPELAG
>Cuni_T002518-R1  Name:"Similar to INCENP Inner centromere protein (Homo sapiens)" Cuni1077:378641-381546(-)
EKERLRNQQERLQQQKQEEVHQNVIRQMITKHNSSLSKQATGLNSSTSGNTSSSKISSYD
ITPVKEKFVTKNKTADNYDIEDKGSDDSTDDEEAPKKRIPEWATGIPLNTALIRQHMNPP
DAEAIFQTHRIEPPNLVLVFPGKKRAKYTQRTSSAIWNSPPMPRH
>Cuni_T002508-R1  Name:"Similar to SLC16A9 Monocarboxylate transporter 9 (Gallus gallus)" Cuni1077:43504-68117(-)
MDRAENQKRELPIDRGWSWVICLASFVCMFIMGTSMQAVSVLFLELVVEFRSSVTITSLT
VMCFIMALSVSSVISTSVLIPIFGERPVVIVSGFVFAVFSVGYFLAPNIIVFIAFAAGKG
TCMGMVFVPCVSLLSCYFNKRRSLATTICNSGVCVATIVAPPIIRALTAEFGMRGTFLIL
GAVELHMIAAGLLMRPVSSYRSAPKENPGISTTAKPEVAVASETSHMRTASITSETGKIM
EEGSHILATSLPDEHNLSENVQYDKPFNDFSNNGHIGKSKTRTVSVNELGNGDTRELMEI
EGLLAEEKLHSQIHRKGSISKKGSLSQRSVRGSRWSFRHTPVGSLLSLPSGVEPVLTSGV
LQVSPPAEVKSQGWKSCCCIVIIRRIFDPYLFSQWSYRWLLISCVPSATTQFLFQYIPTI
AVIKGASKDQAATLVTIIGSVDLVSRLATGVFADTHLLKATQIVAISQICQGILCQFNSL
FDSFEKMIAMVVVMGLFIGTRQSLMAMTHIEIVGMSKMSRCLSISAMVATVSAASHSPML
SAIMEATGSYNIVLHYVGVALIVGALLMLVASFLDQRDKKQEAKKATAHTK
>Cuni_T002517-R1  Name:"Protein of unknown function" Cuni1077:361892-363174(-)
MDVHYDKNPVSSALTQGDQVTSPVLWQCLYVIKTASEFCNLTYRVTKTHNDVEILIVFRE
GVLGVFGPPVEPISLTLDPTGRCLLSVLFKPIGACEHREPREWSD
>Cuni_T002524-R1  Name:"Similar to FRMD4A FERM domain-containing protein 4A (Homo sapiens)" Cuni1077:655840-710776(-)
MTNRLKRRYSQAFLMNDGRKSQVVLFDESRLDIIIQPKLYASELLDLVASHCQLKEKLYF
GLGFMDETHNFVWLQGEKRVLDHELAKKAELLVFYLAIKFYVDTIRLLRDVQTMELFYLN
ARRLVYQGHLQCDTDTVLKLAAIVLQATHGDFASEQKTKDGLKKLPLIPTYTLQEHPSIE
YCEQNVISQYGKLSGTSRGQAIVNYMSIIERQKTYGIHYFDVKDKKSMPWWLGLSPSGLA
VYDKADKTSPRKIFKWNAVENVYYRDKRFSIEVRGYKRFGGTMLGNDELYLRNVKESLVC
RDDVLVYARYRTVEVSNIEVHTYFTSTEQLTKCIWSMAIDQHRFHLDCRRSLNHHSTAGS
ISEIATRLSKSTTSLPESLDSGLTHSCSSHSFTSLSGSTYGLTVEKSDSLRAERDMYRAL
KARRDVLQESLQKKTEELKLLCVKEAELTGKLPDDLPLCPGEPPPVVRRRVGTAFCLSVK
NVQDADQLSNDLSKLELEVELQDKITAAASQLASDRSVAKFVRKQRKQSYVRALEK
>Cuni_T002509-R1  Name:"Protein of unknown function" Cuni1077:92189-94231(-)
GGSIRLTQSGKQRRLNDLLHSSDTTEKLVVDLTKIGRKRTHSLDDESKHTSQYSASGSRD
DFPAAGEYDHNGYLEPRGGKGRYLDLMNYAPELRLLKDPYGNPLVSANGSSLPSVHVTRK
GYYPSHVNYMLLPPEEDAEDVECHRSGDFGAEDSRYCSQSSSRDKSRHPYGLISVEESPV
YSRVVDDHQHYSSSSGREFADVYYHPQSMRAPSGAAVMVPSSRQRKFSDQDLYSSTAPYR
QRHPSSSSSCQDHRYASVECNNNRNSITNSNFSNGSVFLCDGGGGSSSSSSIRNRNGSGS
SYHTYAKPGLAFNMNVNLPPPVEDISAKLSSSHDTWANNSDDVFIDDTASHCSSQLVPEF
ITYQGRSLCSSQSEGQGYIEESTALVGYEEPQVSLV
>Cuni_T002514-R1  Name:"Similar to Taf10 Transcription initiation factor TFIID subunit 10 (Mus musculus)" Cuni1077:327401-334891(+)
MASGAEENKPEFYTYSQENQQSLEKSAGVPLSDFVLQLEDYAPTIPDSVTGYYLNRVGLD
SSDPRILRLISLAAQKFISDIANDALQHSRMRASGQSSKKPGKDKKMTLQMEDLSPALSE
YGINVKKPIYFV
>Cuni_T002510-R1  Name:"Similar to Ros1 Proto-oncogene tyrosine-protein kinase ROS (Mus musculus)" Cuni1077:94990-146965(-)
SVNITGPQSVNNDEIKNCIQGCIFALDEYADNVKEVLGVLHRPTLVISSLGHSSLTLEWG
TRVMENVTYKVHKRLVDMDSGWHLHANTHFWVDGRIDLADLHPYVTYKFKVLALLSSLPE
HILESPETVHITTLPFGAPSTAPQITSLTTPSPRVISLTWTPPPFTNGKVLSYRIYVQAV
NHPQLNLTTIEVPCNATSWLLDQLQSSQKYVISLSAWNAQGEGPKSSRVTTTPNIGNLSA
NETPYLILATANRIVRRTILDVVQYGPQFSKTLHETADESIVIRGISLHVRRQLILATDS
SGSVSLISLKDNSSNTNLYPSIFDPGAVSVDWLADRAYVASKDRIYSCPLDKDLCVVVVR
GLSKPASVVKVDPINGYLYYIINGLGKGLYRIALGAISHLWTNPYSFPAVPATSPRLIVP
MSDLQTHVIDFYNVRLYVINNTAKVMMAAFLDGSNMRPFHEKIVSSAFSQVSSMVFYNQT
FIWTDSKKMYVEEYESRFQNYRHNELLFFTPPYTGMDVFHPSAQPMPVPSSAPDSVDAFF
TRDRVVIRWLPPPLLQYQGHGAFMNWTYELQFSRSNENGDIVSAPKEYNISTLNLTVSNL
SPDTMYAIKIRARSDAGNGPWSRNFIGRTLKQDGLSVLMGLAGGQIVQKDLTDGTEKNVV
NFFSDATDIDWHGDIIIWVTTSGSLSVFNRTSQQKRHLVSAYKAYCAAYDWLGHKVYWSE
PGQGMIRRSDINGITNEYIRQTSARDLAVDAVNGRLYWATQHSIETCRLNGDEHQDIFNL
PYFSGRHVISLTLDFDSGKVLWYVKGYDSQGVFMADLITAGTLGQPSVSWERGGEFRSIS
SSSGLKYFSQRLFWLTEQNSLVVGDSQCNYTSNISFHSNLTSFTVIHPSMHSYPAHIPAD
KVKVIPDPIKSEDITTQGDWSNFNLTWPRSTEVTHGVVFFKVFVEVGRENKHFITPKHWN
EISGLSPYTQLVVSIQPYTYWGYADPTTVSVRSPMSKPTAPLSPEVYVILHKTAAAAPDQ
SLAADFRWMAPQLTNGIISYHLVTHWIGDQPDAKVTVVKVKGTARHFILAPLVKAQTYNF
KVSACTEAGCGPDSVTKTAVTNALNPIPMLLVATKQGLSLMETDSEHNSTIVLTSTPPEA
VTFLSQEEPRVFWLDIQNKVYEKSGISSEEVVSLGGTGQDITVDWISRTVYTVESVSPEQ
NRVMQFNIDTTDYKLLLSRPTRIGSIIADPYNSAILWTEMTSSGQGQVMSANITTGEVHM
VLQGARRSNNSRKACSCPQNLNIAPVIAMDYKGHDGTIEIVFADRTTGAIYSSDITGCHC
TKIIQPTPWKRLGLPPSLLAVDHLRVSWYNQTEGKLYSVTKAMGDGLVIHDVGDLQDIVA
YGSHLQFLPDSRCLEPGKFEFTLEHMQVESTSIRLHLPTPVRSVECQRVSAPRNKYTIYY
RKVKVLKTGTTSDDCHAELSLCEKQKSYSSVVELKGLEPYTQYLIQVAISNYYTENLSEL
MSKPLFLTTKFGVPYAARNVVASPLNPESIIVTWQPPVKYNGPPEHVSYIVQFSTVTAEG
HILRETENMINAESSDELIETILKDLAPNHVYSIKVQTCTNRTMCNSTDVIQTKTFMTPS
DITFLNTTSHSVQIRWMSPPDNGILSHQIFYAVIKILFLFAVSHPDQPLPPTVSHLKSGA
YEVRWEKPADNGAPVTHYMLEYRNVESGTWKEAYNGSIERWLVESSKLKQGKSYIFRVAA
VNSEGIGLFSDNSTVFLAAPYAVESSVIDHITIGVIAGIAVLLLSLILAVVLVIRKQYKK
KKIQQFIIRGPDTELATLRELPRTAFQTSNTLYAMNIQCTDEEIAKLPHFSRSQLVLTMF
LGSGAFGEVFEGLAKNILGDSTGETKCAVKTLRKSALEHEKEEFLKEALLMKNFRHEHIL
SLLGVCLDNDPQFIIMELMEGGDLLSFLRSCRATTAHPASLLLPDLVKICVHVARGCKYL
EDMHFVHRDLAARNCLVSSKSTANMIVKIGDFGLARDIYKNDYYRKEGEGLLPVRWMSPE
SLVDGFFTTQSDIWAFGVLMWEVVTLGQQPYPARTNIEVLHFVRDRGKLERPDKCADEMY
SLMNKCWDFLADHRPSFADLLAELETFQEKCSHMTLAEIAQFSPSVTG
>Cuni_T002523-R1  Name:"Similar to PLCXD2 PI-PLC X domain-containing protein 2 (Homo sapiens)" Cuni1077:629613-639414(+)
MESTLREGEVSSSHGPGDEDVDSAALKPVIKTETWMSSLPPSLHNLPLIKLAIPGTHNSG
TFSCCTTLAPDADSAIKLMTRIPNMGGFVDSVILRWAQCQRLNFTQQLLSGIRYFDLRVS
TKPDSDEFFLVHTVYAAKVNELIEAVTSFLDSHPREIVLLDFNHFYAMEEEHHVQLITYL
IAEFGPKICPRCPIDELTLSNLWVKGHQVIIFYQDKAVEPFEEMWPKQQICTFWPNTDNP
ETCIERLHKLFNNKEPPAGIPHFRVCQ
>Cuni_T002522-R1  Name:"Similar to Tktl2 Transketolase-like protein 2 (Mus musculus)" Cuni1077:589323-613745(-)
MSNYHCPDSKTVQTLKDIANKLRIHSIESTNASNSGHPTSCCSAADVMSVLFFNVMSYTV
DEPRHPNNDRFVLSKGHAAPILYAAWAEAGLFPASDLLELRKLTSDLEGHPTPRLNFVDV
ATGSLGQGLSCAAGMAYTGKYFDKADYRVYCLIGDGESAEGSIWEALAFGSRYNLDNLVA
IFDINRLGQSEATMLEHDLDVYKARVEAFGWNTYVVDGHDVEALCKTFWDASHVKGRPTC
ILAKTYKGQGIPGVADAENWHGKPLGNQALEAIKAIKDNIINAGPHNIIPRQPTVTLSPV
NTSVELSQPPSYKLGEVVATRLAYGTALVKIGKNNDRVVAMDGDTKNSTYAQKFKDAFPD
RFIECYIAEQNLVGVGIGCGTRNRTIPFVSTFAAFFTRAFDQIRMGAISQTNANFVGSHA
GVSIGEDGPSQMALEDISMFRSVPGSTVFYPTDAVSTERAVELAANTKGICFIRTSRPNV
PVIYENNEPICCWEGKGMLSIVRQSASDQVTVIGACVTLYEALKAADILAERGVNIRVID
PFTIKPIDADTIIGSALQTGGRIITVEDHYAEGGLGEAVAGSVSHQSGITVKRLFVPEIP
RSGKSEELLEKYGISANCIVKAVENFLSA
>Cuni_T002521-R1  Name:"Similar to STXBP5 Syntaxin-binding protein 5 (Homo sapiens)" Cuni1077:453179-534494(-)
MSSSSASKAKKFTLKTVLDGLRGSGGSSQNRPDTEIEETLRSEHYHVTKTVRHGFPYQPT
ALAFDPVQHLLAIGNRTGSLRIIGQPGVDCHCSHDADVSIIQILFLVNEGALVTVTNDDH
LHLWNFRQKQPSIVHSLKFQREKVSKCHLPFQSKWLYVGTERGNVHVVNVESFTCSGYII
NWNKAIELSRKTHPGPVVHLSDNPVDPNKLLIGFESGAIVFWDLKTKSAEFRYNSQEALR
SISWHNEGKQFMCSHSDGSLSTWNVRSPLRPVSVTSPHAKIGADGRLEMCKPIAKVEWRS
TRTGEAVVIFSGGMSYDRAARTPSITVMAGKSITVLEMEHNVVDFVSLCDTPWANDFQDP
YAIVVLLQNDLVVIDLTSPGYPCFENPYPMDLHESPVTACQYYANCPMDIIPALYSTGKN
QKKTGFSEKPWPIKGGSWGSSGTSYPEIIITGHADGSLKFWDASSVTLQFLYKLKTAKVF
EKPKRPSEDKDDDPFAIQNIFLCLESRIMCVAGPTHCLLFKFSKQETVVDVVALEFPIVY
EIFDELDSPEFDFSKPSLTVVGQHSGSMGSYSSSASDNARSETMTSVKARGGTHRWGPGF
LPDLVCILCWVDGEPPGNITVMSVNSSYGLLAFGNESGLAIVDYLQKACLLNLGTPDLYG
SMDPYQRAPRSPRSKKGPGDVVIPGSDDCKSPTVEQSASNLTPNYGSDTSPSDIPTPNSA
LNPEIPVSGIGEVMAPSPQSKQAVVKSMSLSQVASARTSPVINHGNTLADDSHSSLGKSL
SLGSPESVPQLSAPHSTPEGPHGFHHSPKISRTTQRMSSEPLGPVDEDYFKAEVTVERND
IQREFNIPKAPPRNKHKNKTLIKRPLLFLNHDHSKTPVSKAIPCNTEQKAEFPPVKAVCL
LPRSLSEMGQTSNQQAADTCIAYNTEAMLCPSSAMKLKCASAGDIAADECVQIDSFTSEA
KKKEEHARKTFSDPENLDDSDNEARLRELLRKSSSDSHISLSENIPVVEMNQHLEANKHW
LMKTIQKTSKTKKKEVDGRKWSEENSEQQLGDGDLTDISLNKCDIDQSESSAKFGAELQD
EQQEEKEVHDQVGCVDVKHSGNTAGFFTQVGLKIKSLSSKKITTEDEDGEVSATHKVQPK
THEQQLKCKIEVLDLTDDAATCKHTVRKFNLSDVVQMRKALEKGDSSSFSRSRSSSMSSL
ENVTKEAIQCLVFTDSYTRKQDNETSPCLWVGTSLGSVIVIVLVIQPEQRLSQPVIVSPS
GSLYRMKGAIVCMSFLDFKGVLIPAVSEQWRDNRDNRDWSSKVAASRQMSVCNSKPRISP
TLSAEISSDRQFAILCSEKQARAISLPSQTCAFKVKVTETSFVVKADIVAMRESVCLMCY
VANGHIVAFSLPSLKPLFDADFLPLTDYRLARTFCFSNNGHAMYLCSPTEIQKITYSAEI
SENLNEMLGELFLPKDTPEAPKQGFLKTLFGGGMATLDREEL
>Cuni_T002519-R1  Name:"Similar to INCENP Inner centromere protein (Gallus gallus)" Cuni1077:384691-405714(-)
MKTEEWLCDLPKACRILTTPGLLCQSVLHEKLEEIAAEFVWLDEIYDEAIRMFSVKRAKL
EQMPKTPSLKQKGGKASKAKILKVKNESEDSESPVNIKGVPTKLTFESPKSLSSNSDNTV
TGGGRPLRNCRATSKVSYVDEDDLPKRSTRQSKKPINNHISNSSLCTESLQKMSSATVLL
EVEPFIDSMTKVKTRPSVVAKQKSEEKSPSVRDRTKAYESMLKMRVSESPVLKQGGLAGI
NKSAHVVLEVISSPTVSASPKGQMSGHSSDPGCGHSTNVPSAKQSSEVDGARPTRTRLKL
KKQKQEEEDMDVGMSRQPDATKERNSRKHSIHLTTDMETESDSCGQQSPDHHREILNETE
TVITEIYDIGEKGQPAKLREFEIVQTKTTPICERLRPLVAADCVSDQGFNDGDMESTQES
SDDSQRADRASHDLKGKQVDSSTQILIRKNSENGCGDENSRCKSNKDSGVVSEVASKADS
TFVKEKKSLESKTRVTRTRTKAEKETVSQETPTERMTRTRQRKQEESQKTSQDLKPASRM
KKAVDPNKLAICGSDDEIIAGSPVVAPSRASLRGAAKKRIADERGLSPRPKRSCVGDEST
LNIRSPPQSTSSPLKRKDAAQLSEGYDKVASPRRSPRAFKFNSAQKVTSGFLNRTPGFGQ
NTSKLCSFLSNTPTCRSTSFLTSFLKRNTPPPKQNNQVLQEQKRQKLLEKENRDMERLKR
AADLRKKRIEDQKRMREEKEQKVAEARGVRLRNEEEYKNRINKKMEDKATLKVKVMEERI
KEEREKQKQRLRKQMEADTRRKVEEEERLKKFLEQEEEAKMHEEFMQRKKEFEEAERRRQ
IAEEKRKHDERLAELEQRRQEELTRLRLAEEEKERERERTRLE
>Cuni_T002520-R1  Name:"Protein of unknown function" Cuni1077:422066-431753(+)
MSPPKVSLLGKDAQKCEFDELHIHLLLLRLYITIVNVLRRHHRLDWKCLAYKGLPTNVHV
DSDNQLIHASHDHDADTDTNSMNILHEYNRHLVAYKDVDSSTCYIDRLDETFEEGYQRWR
SYEEGRNSSQALKVISQSIEVEVLQHIGDIHIYAHCQNAQSFWVKEIDIREVTTEMRVVY
V
>Cuni_T002511-R1  Name:"Similar to Gopc Golgi-associated PDZ and coiled-coil motif-containing protein (Mus musculus)" Cuni1077:237061-248581(+)
MAAALSFRWLEILEKEFDKAFVDLDILLGEIDPDQCELTFEGRQKMTALSAAFAQLTHKA
QTVFQCNAKLEAQLVDMRSDIIELQAAKAVVEQEMHTLLLQLHSSQLEVQESRGLEVDSQ
EIKKKLEAELASRQQSQQVVAKLEAEAKMLRRDNRDLRQYILALQSEVYGARLSAKYLDK
ELAGRIQQIQLLGRDMRGAEHDKLWNQLEAEIHLHRHKTVIRACRGRNLHKKKVLCPPGH
NVQDLKKKHGLGDVRTVTVHKEPDEGLGMSITGGKEHGVPILISEVHDGQPADRCGELYV
GDAILSVNDIDLRDVKHAEAVRVLSQQ
>Cuni_T022197-R1  Name:"Protein of unknown function" Cuni1078:454255-454832(-)
DADDVVRRRRIAGAVHGKVAAAFRARSARRLAAAASPSPGPSHPQSQSFSRSYGSNLPTS
LTYIVRLEAVHLGDLLRIWVRPGTKFTPSPWGFQGPTEAHRTPQEPRCFTEPRSLSPGKP
IPGMWLLTKKRELFPGLPPTSPTSFALPHVAPEDQSPCPGSGILTRFPFDRLLADSENER

>Cuni_T014148-R1  Name:"Protein of unknown function" Cuni1079:235363-246904(+)
MSTFHIDHNKTSLLLPVKPYKPTCNLSFLDVTLENLNISSTPHMDAGEQSLVNMTVEKYL
DYLNTSFAARLLPAVVVLVVLMAVGSKRGTVTLFIQSLAVFDLLSCCRIIFKNKTHKQPR
EIMSMFLLFVSSGEIIDMTNNYTFGSHSLCKIMRTVNLFCTVSSGATLVVVAIDRQRICC
PLRKQITPKGATIVVCVCAVLALIISLPTAILYGSRSIFTDLPSVNGTDCSISDQFANTV
FPIAYNGLQMLLFLAGAVILIVLYSLIGSKVCRHVKQQIVRRKSSCAARSRFSPGGASTC
SVYSGNANTGCRVESGLSSLVNGHGATEVTDRFLPVNAQIGVTVNVRADMLNKKQENEVQ
RNNCSRYDYEEVTCFSGEDVSLPVHGTDCQMIDVNVEKCDVESTTAKLYLQTNRLIDKCY
GIPENNTEVELHNDVQIRLIMTSYDLLSTGSRRTTLMLLMITLIYVLSFLPHLVLMALKA
VDGDILAGPSTAWELTQNLLIRSYFINSVANPIIYSFFSRHFFRRCRGSRNGCSSG
>Cuni_T014146-R1  Name:"Similar to CCDC151 Coiled-coil domain-containing protein 151 (Bos taurus)" Cuni1079:63000-82049(-)
MPNKLHDAQRSISEQIEELKAKISLLEGDRKAYLESSQHAIKRNKEAILSLRKETKELRQ
RLKDRLSQDAHVIGKAFHDRPVERAALSNKSGPQAIVIFDHKVCDTVKLLNAKRHITAQK
LKKLEELQMQYDQLVKDSSDAVNTDKGESADAQTMRYLENSYDKVMMKMEEAKQVQRVYL
DIKSKFEAEAQEYPRKLDILETEIRQTREQLKQLKVMYNDAQLAKETAINDLRQLEETVY
AERKKREIELQKMKKEAEEKKLQYEKIEKRIAQRSALQHDEFSSSLRYEDHQQKITTYEE
AFKRIKECTGISDTMEVVLRFENQGATTEHLEQLKKDNEKQIIRLREEKKKLQQEFEEMK
YSGEAKLSSGQAVLEEFEALLAKEEAKRDHADEQLQKSSRILVQVKAGVEHLAGKLHHLK
LSRGHVLSPQISPSSDEYVLDQLSTVEEKLLKLLEELEGKNLPEILKQMEEEEFHASIEG
KLPPYNTRIKLPQTQRDLVYEDDEDSGEDDVDVPNRSTIKKQSQFIVDSKTRRREPKRRR
R
>Cuni_T014149-R1  Name:"Similar to Drosha Ribonuclease 3 (Mus musculus)" Cuni1079:255202-278862(-)
GYRPAQLSYAGDPVYRKAWKQYVKFRHLLNSKPKILGADKLKLKEQEEKLREIRMKKTMK
REVTVELSSKGFLCTGLRADLCQHALMVPVLMSHLRFHVCLDVLEEDLDYRFQDRNLLQL
SLTHTSYRTNYGTNPDHTRNSLTNCGMRQVEYGDRRIHYQNTRKRGICILVDIMSRFGKQ
EETSSEIPHNERLEFLGDAVIEFLSSVHLFYMFPWLEEGGLTTFRMALVQNQHLAILAKK
LKLQEFMLYVHGPDLCHESDLRHAMANCCEAIMGALFLDGGLEVADRIFARTLFGEDDIL
LQTWNDVPKHVLQQEEPGGDRHWVKSSPILQKMEKFEERIGIKFNHIRILAKAFTHRNIG
LNPLTRGHNQRLEFLGDTVLQLVASEYLYKHYPEHHEGHLSLLRSSLVNSRTQGLVYDDL
GMSEFVICNESAASEGLDMKTKQRADILESFVGALFVDKDLDYCRTFCNVCFFPRLKDFI
MNQDWNDPKSQLQQCCLTLREVGGGEPDIPVYKVIKSIGPTNTRKYVVAVYFRGKRLARG
TGHSIQQAEMAAATQALKKRAELFPILQHQRRFLERMRNDDSDRGSDREEVPLARILKPS
RSHLRRRLPVRHRNKHD
>Cuni_T014147-R1  Name:"Similar to PTPRE Receptor-type tyrosine-protein phosphatase epsilon (Homo sapiens)" Cuni1079:116464-145303(+)
PLKSYELLVTDVDDVNATSVTYITNSSRLRLVNLSAYTNYSLQIRYTNVAGAGHWGQQFM
FTTGEDVPGPVEITELTPTYSTITVTFLPPEVTNGVITTYTTMFASNNSNFSMAESTTVA
AMTGRFTVTVERLSPETVYYLKMAASTSAGIGQFGSVKQTKTLLAPPPPKPMSIKLSAQT
NSCLTVEWTTPVSILPSVSGFVLDVRKVTADITTPPITANIPVSQNSYQMCQLQPSTLYK
VTVSGTNIDGVVSFATDNYSTKQGTPPAPVAPVFVRSTYTNITIAIEPVVSFDVPITSYE
IQAHLISANNRTKRYAGVPGYVTAELSPSDVTRRREFVVGDGKLYGKYTNKALEPNSYYM
IYYIAVSTLNSDTTASWSQLEAAILTVPFDPALSPPLLISVISRNMTCLNVKWEILQGTK
SDTTGFILNLKRIGDETFLTTRNLPATTENYQECNLTPYTMYTVGIIAQTPGGVLTAASE
TFATEHNIPRKPTAPVFVSATFTTITISIEPVILTDAPLTAYQLQVQAGSSSRRKRLAQV
PGYVTAQLIQSDVPRTVTFVVGDGKDYGGFINKPLNSETEYMIHYVVISTVGDVTKYSYS
SLQPAVRTVPLTSREDNRGVFIGVITALVILILFIILLLFLYWWWKRNRFNPYTIQQDDK
SLLTPPKLKDDYEPESYWKTIYNLKDSRHIIAGRHLIYKDDQPPYANKKAESYTNSPKVC
FSDEFHNLPRKPKRSADNIAQRNRDLNRFPQLLPCDRSLVKLKSDISSRRTYINASWISG
YKNGPTYIAAQSPYDETTTLDFWRLIFQHSIKTVVMLTNVLEDGIVKCTHYWPENTSTTF
GSFLLHPIQVKEYADFIVRTVGVRKKDEEHSKIVQIFQFTSWPTHGVPDDPIPFVEMRYK
VRHYHHDGPGPILVHCGTGMGRTGVFIAVDALIEQYALEGRVRVFDFVSKMRKNRPYMVR
TEKQYKFIYEAIFEEYHAGDTLVKLDLQERYHNWTQKNPETGHTYLRDQQQLLEAFSKGP
SQEEYRTALLDINVQKNRFKDILPPEKFRPLLKSPGGLNSTDYINALFLDSYFQKNHFII
TQTPLHTTITDFWKLVYDYDVRTIVMAEDFKNEDNSCAEYWPSMNLKLFEPFFVETTATY
QQESITIRNFSIRSTQFPKEPARLVRQFQFTSWAPQNITPPSRTELLDLINGVFAWQDEI
CQDEKPVIIHCQNGASHSGLFAVLAILCEKMEEEGEVDVYRTIKHCKRRQPKFFSDYEQL
RFCYKTLWDFINLHMAGWTFTDTFQKGNDNPLFGVRSLSMSSLDKGSGDEEAEI
>Cuni_T005038-R1  Name:"Similar to X-element\ORF2 Probable RNA-directed DNA polymerase from transposon X-element (Drosophila melanogaster)" Cuni108:637781-638734(-)
MTVGTICRDDGVRVTTDKEKGEAFLHRFIAQTDHSDVDIRGAVRKEFAGTLKNMHYEDMI
QVEDIKQILKKAKDTAPGPDGVRYGHMKALSDVDLAEMADYFNQSIKTASVPQDWVHSYL
IPLPKPFKDHSKLSGFRIITLQNTFWKVLEKIVAVKLQEFLERGKLLPRGLGSFRPGKDT
WANAATFAFDACEGFQNRQETIAVGLDLEDAYNRVRYDILMTALREKEVNPWLVNWVAAV
LYSRRVALRLGSWTSETCTLAPGLPQGSAISPVNFNVYTSKIASLEAPGVGRILTFADDI
LAYRQGEEREQTARELQ
>Cuni_T005031-R1  Name:"Similar to SPAC25B8.09 Uncharacterized methyltransferase C25B8.09 (Schizosaccharomyces pombe (strain 972 / ATCC 24843))" Cuni108:356876-357701(+)
SVPFIGHMRKPAALGFKTGGDSYDARRPGYTDESVDLIVSEIIATSEAAKTRDLKYDVLE
LASGTGKLTESLSMKLPSHMKYLATEPSENFLKILKSKVLNVDVAMATADSIPLVDNAVG
SVVCAHSFHWFSGMENLKSIHNVLIPGGKLILIWNMKQFGHGWMSAFYEQRQEVVKRIGG
SLNDLFNTMQWRKDIDTSEDFKLLWHKSLAGVKFQGDIEKVLSHLTAVSYNLLPAVERDA
YAHQLRQILINWPGLDLNNITVPYTTELYVFIAQ
>Cuni_T005041-R1  Name:"Similar to lov-1 Location of vulva defective 1 (Caenorhabditis elegans)" Cuni108:742853-751383(+)
MYSSRKAKRSRQSIYWTKTFWGVFPLVDNYADEEYFYLIAVHTGLRKSAGTKSRVSFCLS
GEFNDTGVRQLRDGIREANIFSFIYLLCFGFSSASLLYFVMACPGSLGPLQCLRIWIDNS
EKSGDASWYLDRIDVTDIQTGHT
>Cuni_T005042-R1  Name:"Similar to Pkd1l2 Polycystic kidney disease protein 1-like 2 (Mus musculus)" Cuni108:752694-761641(+)
MDKIIAASSVQDLQSLKSMLVINTRKHITDEHIWLSVLIRPEWSRFSRVERLGCCLTFLL
LAMITSAMFYRGAPDVDRQRPHPGLLIGPVRLSFQQLYYSLVSAVISAIPVAVLVTIFRK
ARTTPDKGDLFCCCSFTLTDVKAVESKNTCCSKLPWMAKMEEQLKKLDNILLIKPDAEEV
KTTWPQWCRSVGWILVFLLTSVCSFFIILYTMEWGRDVTEEWLSSFFLAFIESLFVVDPF
KVLLISFLLSIFVRKTKVKGIDELNLQHIRQVNKEYGVKNSKSHSLDETDPPRESVSFLP
TVTEEELQAATRKRKIHIMVRKTLWELAVHCIFLIIVCSLCYSNRTAHAYHLHAKVYKDL
VGHKATGFSS
>Cuni_T005046-R1  Name:"Similar to slc16a12 Monocarboxylate transporter 12 (Xenopus laevis)" Cuni108:856049-866125(+)
MEGGKWGLVIILAAFMIQVLAFGVTSTVGVYNIDLLDYFDGATVGVSLIGSINYGVFLGS
GPIVSFLMTRFSYRKIALFGSVLVVIGLLGMPILPYIPAMCVCFGLLTGFGSSCAYIPSH
VLSGLYYDKHRSLATGVATSGSGLGGAIMPIITGVLIEYYTWKGSLIFVAGLCLHLIVFS
ALLREPPPLLMKETSITHVVPLNSKSAYEAVDVSKAKKIPNSSRHIYIFTNYGFDVYFAS
NIMWNAGTAIVNAFVPEFLTEKGLSPMEAAWYAGIYGFGCFVGGVLGGVFGNFRWVNRQV
LYTASNIVMGVSLSAFPYFEQKPLYLVFLIISGIAFGIILGLLIVVLTDLIGVESLGNGL
GYLMLSNGLGTFIGPPVAGLIKEATGSFKEAIVLSGVLCVFGGLIMILMPCRWNCCSQKK
TEHLVYNN
>Cuni_T005043-R1  Name:"Similar to PKD2 Polycystin-2 (Bos taurus)" Cuni108:762414-773968(+)
VKAPVEYFAWLENILVPWLFPEEDYSGRSIISEDRQYTSVWSLYRLGAPRLRQVRMKKGD
CMYDSVYTGQCVDKFSIIHQETTEFCLGWSPIPCPPTDQFHVTAGAWYYRLDISILEFPI
AGEYNTYGGKGYTVNLDINLIIVTAIIQEMKKYFWVDRQTRAVILEFTLYCPNVDHFVHV
TLLAEFLETGGVIPYVSIYPFTVYDPPGFFGTYILICEILYTFFTVFGFVYVLYVFSKEK
WAALKNCWFMVDFAAVIVATAAASMFYLRLSSVTIALSKMEEDRTQFISFQQVVLWDKGV
IACLGFLVAIAFFRLLKLAGYSEVTMKVRMKISVCVDM
>Cuni_T005037-R1  Name:"Similar to Stk31 Serine/threonine-protein kinase 31 (Mus musculus)" Cuni108:567730-631800(-)
MSTVPGTRRVNTFDVFVGNLPADADQRKIGKLFSKYGEVHNIWINTATDGNKYGLVKYYC
EEDGLKAIEETNGMIFEGGKPINVKKAVKRGGALLRKDGDSDGNQEKEEGRLPMSLKQRN
PDIVPVMESGTGLPNKRDMEKLMVSFVETPIALWGQKLCPENIDELSNIIEQLAIICPDA
SKLTGKPESDKIYGAQYSEDDCWYRCSVRYVYSSERVKVQYIDFGNMEEVNPSTLVELPK
SLTALPPCAMKFVLNSLWCNNNHDPNAIKFVREMVEGKEVEVYTTARLSDHTGFFADIYI
DGVCLNEKMLENNLAFRKPGLEQRGLKGRNQGADGDTNSNNSFKGGLLNQRDGQRKFETE
KDEINNLRWKLKNLQTEYTSLSNKAQENDLSLQIKNLQILSSMVKKLRNQFPIDKDTPLD
VAISLVQGCDKIDVSMAASLPEVISAINACKNAQDDILKCSDNAVLQEKIETRDNLRRDL
HNKLNTTIQELNKVPLQDRGKQVQDVVAALTKHYDAFIKIPIPNLPPIDSLIPSFQDWKE
KKKGEVIECRSFSDLMESSVNAAFVQLKTQISISCECVEPESSDDLDSTLKNYAKALQQE
VTVSDTENSPDAIIIGSLVQALLRELSEEAMCVDHLSNVLHEFSALKEQISPWLDAKPST
AELQTVKGKLKSLKSKLRHKLADKMDAEENHDTKELEEIAKDLEDIRSKIHKALIEEDKL
MSELSQLASAHFPELLHSDSDTGFSTYLTYKGLVKQSQALDHFTLTSIGSSSSGMYESSF
DGEPVILREYFLSNGNHLDKEEFLSRMALYTNASSSNLETICAVFFDKNNRHAYVQVKKQ
GELLSTLVESSKLTKQHCQSIIRSIARALQALNLYNFVHGQVQPEFIMVDEEGNAKLLPP
DFSLTDTDRCRSRYTTSNGIDIIAPEMKQNMIPVEPGHSVDIYCLGLLALWMHYPNTHFM
ERKDGTLDFSSLPMDRRLGIFLMKLLCPNPLLRPTADLCLRSEYLTQPVVAETLPTEGQS
ALYSLAQSQDPSGGRNSASPASVLSQNSNDGIVFAESGAGLQ
>Cuni_T005035-R1  Name:"Similar to ADSL Adenylosuccinate lyase (Gallus gallus)" Cuni108:521383-538483(+)
MASSHAEYKTPLASRYASQEMKENFGDLKKFSTWRRLWLYLAKAEKALGLEITDAQIEEL
ENNLENIDFKMAAVEEKKFRHDVMAHVHTFGAVCPKAASIIHLGATSCYVGDNTDLIVLR
DGLKILIPKLASCLDQLCKFALENKALPCLSYTHLQAAQVSTVGKRACIWAQDLLMDLKN
LERVLDELRFRGVKGTTGTQASFLTLFEGDASKVEELDSLVTEMAGFKSHFIICGQTYPR
KVDTEIVSVLSSFGASVHKICTDIRLLASFKELEEPFEADQIGSSAMPYKRNPMRSERCC
SLARLLISMVQNPLQTASVQWMERTLDDSANRRVVLAESFLAADAIINTLQNVFEGLVVY
PKVIERRLNDELPFMASENIIMAVVKAGGNRQECHEKIRSLAIQSASLMKHEGLPCDLLD
RIRADAYFACILDKLASCLEPSTFVGTSVSQVERFITTEVTPVIVKYEASFTKSVALEI
>Cuni_T005032-R1  Name:"Similar to SPAC25B8.09 Uncharacterized methyltransferase C25B8.09 (Schizosaccharomyces pombe (strain 972 / ATCC 24843))" Cuni108:383360-384367(+)
MAAVGSLLVQCLSRSRLLNLKMTALCVCSVGINIAKGHQLMSQHILLSRLHTALFYSNMA
PESSIGQMRRQAALGFKTGGDNYDAHRPSYTDESVDLIVSEIVATSEAALGSGLKYDVLE
LGAGTGKLTERLCKKLPSHLKYLATEPSENFLEVLKSKGLNVDVAIATADRIPLADNTVG
TVVCAQSFHWFSSKDNLDSIHRVLTPGGKLILIWNMPEFSYEFMVAFYEQTIEVVKKTGG
SVNYLINFMDWRKDIDVSEDFKLLWHRSLTGIKIQGDIEEILSNHATGSAYKLLPAAECD
AYIDQLRQILKTWPGLNLNNITIPHTTELFMFTAQ
>Cuni_T005045-R1  Name:"Similar to cact NF-kappa-B inhibitor cactus (Drosophila melanogaster)" Cuni108:806731-807870(-)
MCPQTELSVYERQPSLSQVRCPHTMIHAVRSVFLQGDHNPGLDCMNLPSIDVTERYNTIS
IEHAFSHMKIDGERLSCHQDSDKDTSHCDGSCMSPDDVSSETVCETGCMREDISLRNDSH
FDDILRDSETCGGKLTHIIESLFEGDQDGDNSLHLSIINGYKSYSRLLINLAPDFDCLNL
SNNLRQTPLHLAVLTRQPDIVRRLVCAGAAVLAQDQQGNTPLHLACGLGDKQSVKHLLTP
VFYEETLENKYSIPYQRIPQDLRIRNYEGQTCLHIAVSARNFKVVQMLIDTGADINVGDG
RSGRSVLHLAADTGDTEMVEMLLSTRGIQINTRDFAGFTPAQLAYGRSHTETARLLYSIT
GHYDGTHVDDAMLEDNAQL
>Cuni_T005044-R1  Name:"Similar to PFDN1 Prefoldin subunit 1 (Bos taurus)" Cuni108:791795-800696(+)
MAATGHAVDPDLANAFAELSMKKIQAESQIRLSNVQIESLNRKIQHTALVEHEVASLPSE
TKVYKAVGRMFLLQKQNQLIESLKSKQQSFAEKIKSLEASKEYLQRNIEEFKNNVRELVM
TKQSSR
>Cuni_T005029-R1  Name:"Protein of unknown function" Cuni108:275804-302745(+)
MGNCCRRCCCVLDRRKYLQSKYTAEQEFSIEFQTLMDEEPQRNEMTRKFVTLNMEFIFWI
ELHLLNTDNFDCICSQDLFYLLLAEQEHEDHRFAARHESVPVAHFNKERNATASAAINKA
CTDDEDWEVAGGDDDFEIFLASVQARSLAAQSQVKNGDAQSSSSSNAVTKEKSFTEGSSI
DLSWDHETEVSPKRKVCQRVSEDSWSKPSTASPMHSSDLEWDPDFVSAEDNERMQLLNAA
TGHISSR
>Cuni_T005030-R1  Name:"Similar to eif3l Eukaryotic translation initiation factor 3 subunit L (Danio rerio)" Cuni108:307023-340754(-)
MSGTWANEIEPEYVPYYSGYGDYDMSHTGDPRQDLEYERQYASSYIVPEVIKNFLLYFQK
YINQQDLPEIQNSYENGFNKLTDRFFKTSAWPEAESVIPIVGNDKRFLILYKELYYRHVY
ARVSGGPTLQQRFDSYYNYCNLFNYILNAEGPVPLELPDQWLWDIIDEFIYQFQAFSIFR
HKSINKKTENEIEVLRTNPKIWNVHSVLNVLHSLVEKSNINKQLEVYTSGGDPDSVAGEF
GRHSLYKMLGYFSLVGLLRLHSLLGDYYQALKVLENIDFNKKSLYSRVPACQITTFYYVG
FAYMMMRRYQDAIRTLSNILLYIQRTKTMFQSRAQLYDQISKMNDKMYTLLSICLVLYPM
RIDESVHSHLREKYQDKMNRMQKGEMQEFEASFAFACPKFLSPVPPNYDLTGAQTQFKEP
FQLQLLVFKDEVEQQIQIPTIRSYLKLYTTLPISKLAAFMDMSDDELCTHLMCFKHKMKN
LVWSKGTSGLEGEFQSASEVDFYIDKDMIHIADTKVARRYGDFFIRQFHKFDEIMRSLKA
T
>Cuni_T005036-R1  Name:"Protein of unknown function" Cuni108:563370-563573(-)
VVSSPQPANSARPNEELSNGSASTSFPDSSKPENELGHVNNEDAVSEDKFEDADAQYNDE
EKGTEDN
>Cuni_T005039-R1  Name:"Similar to MM_0045 Putative ankyrin repeat protein MM_0045 (Methanosarcina mazei (strain ATCC BAA-159 / DSM 3647 / Goe1 / Go1 / JCM 11833 / OCM 88))" Cuni108:652838-664766(+)
KLSAIGTAAHMSISWQQKNTAGLAAPRLRNGDRSGFEKREKRRNIRQLQAAISQGDLELV
KSILSSDFDVDFQYNGQTSLQLAVCQGLPDICSLLIAKGANVNQTNADGNSLLNMACWRG
FTEVVDLLVNNGADVNSWNESGNTPLNACAFKGFANIAEVLLSAKCDINLHNEKGHTPLF
CVSRAGNTAMVQQLIKAGADLDWGDLTQKTPLMVAAEEGHLQVVKALLAGGACVNRQSQQ
GRTAAYEAASCGHEDVLRELISYKADAISQNHTGAAQILIQSAGCNVNLADRTHRAPIHA
AIRQ
>Cuni_T005033-R1  Name:"Similar to BQ2027_MB3374 Uncharacterized methyltransferase Mb3374 (Mycobacterium bovis (strain ATCC BAA-935 / AF2122/97))" Cuni108:400491-401498(+)
MAAVGSLLVQCLSRSRLLNLKMTVSCVCSVGINITKGHQLMSQNILLSRLHTALFYSNMA
PESSIGQIRRQAALGFKTGGDNYDAHRPSYTDESVDLIVSEIVATSEAAVGSGLKYDVLE
LGAGTGKLTERLCKKLPSHLKYLATEPSENFLEVLKSKGLNVDVAIATADRIPLADNTVG
SVVCAQSFHWFSSKDNLDSIHRVLTPGGKLILIWNMKQFSHGWMAAFYKQREEVVKKIGG
SMKDLVNSMEWRKDIDVSEDFKLLWHRSLPGINFQGNIEEILSNFTTVSAYQLLSAAERD
AFIDQLREILKNWPGLDLNNITMPYTTELFVFIAQ
>Cuni_T005040-R1  Name:"Similar to ANKRD50 Ankyrin repeat domain-containing protein 50 (Homo sapiens)" Cuni108:668172-685810(+)
AVDSVTKHGSTILHAAVYGGKIDVVRFCLDAGCKVNAVDDEGRHALMAAVSCRCDIKIIE
ILLDAGSNLSVTHKLTKRTALHEAICQHYVLATHLLIDRGGSLTAIDHEKKSPLFLACQR
GLCETVAYMLSKGNCPTSSPFASALPIHAAASQGRASTIELLSDHGCDLNQTNEKGETPI
MTALAEDCFSSVRALLQCGCDLEAQNKVTSLQICCILHEDPHPHLGLEPLFLALTHKNVP
MMKMLLQCYCHIPSRTIRVLTKLLKQTQGLNSHYTPQQKEEIFSLFTQHLITPFTLADAC
RRRIRACLGCPIQVKVKHLPVADKVQNYILMESEFEAWHEIEQDMPGGSSGFSDIFVRRE
SY
>Cuni_T005034-R1  Name:"Similar to Bifunctional 3'-phosphoadenosine 5'-phosphosulfate synthase (Urechis caupo)" Cuni108:479224-507292(+)
DEHRATNVVYQEHHVSRDKRGKAVGQKGGFRGCTVWLTGLSGAGKTTISFALEEYLVSQG
IPAYCLDGDNVRSGLNKNLGFSHEDREENIRRIAEVAKLFADGGIVCITSFISPFRADRD
KARELHENAGLKFFECYVDTPIEICEQRDVKGLYKKARAGLIKGFTGVDQPYEEPKSPDV
DLKAGELTVDECVQEVVSLLADHKIVPRGTLTTVRELFVPEHLREQTKAEASTLPSVEID
QVDLQWTQVLAEGWATPVSGFMREKEYLQSQHFGCMFDDGIINQSVPLVLPIRTADKERL
QGCDAFTLKYGGKDIAILRRPEFYPHNKEERCGRQFGTTNIGHPYVKMIMESGDWLVGGD
LEVLDRIVWNDGLDEYRMTPQELRLKFGNLGADAVFAFQLRNPVHNGHALLMSDTKKKLL
DRGFKTPVLLLHPLGGWTKDDDVPLPTRMKQHEAIIQEHILDPSSTVIAIFPSPMMYAGP
TEVQWHARSRMAAGANFYIVGRDPAGMPHPDGTRDLFDPTHGAKVLTMAPGLSQLEIVPF
RVAAYNTRKRAMDFFDPQKKEDFDFISGTKMRKMAREGISPPEGFMSPKAWQVMVDYYKS
LPAIKSG
>Cuni_T016863-R1  Name:"Similar to Wsb1 WD repeat and SOCS box-containing protein 1 (Mus musculus)" Cuni1080:252212-276992(-)
QATVVEQLISITRNAGIKAGGEAWTCAWAPDNSYFAWSSGHHILHLIPFDCKKGKQHSKG
DSEGLKNRKFHVIDCGENIWSVAFGSGFSHRESSCNVYRHCHFDEDLIVATGLANGRIKL
WNCFTGSLIIDLLDHRDTVRCLDFTRDGTLQLLSASLDGSLKWWDLPNEGNLYSTFKSLT
SKLCGCRFAPNGNFIAAVGSNKTVYLWTNAKLNTHPYKLEGHCNDVVGCDFSPDSALLIT
AAFDTKVIVWDTYTLQKIWTFGHMHPSPRLIFAGGANDHYVRGVTFCRNGSTIASVCDDG
YVRFWNTEDLGDPVVIKHVPEPLSCQFSPNGSVLAVGLRCGDVIFLSASQTAPSLLQLSR
QVIRKQTNPENITSLQIPKVLIDYLSYYDFPQRSLA
>Cuni_T016862-R1  Name:"Similar to actr2a Actin-related protein 2-A (Danio rerio)" Cuni1080:189703-207800(-)
MDSQGRKVIVCDNGTGFVKCGYAGSNFPAFIFPSLVGRPMIRSTTKVGDIEIKDLMVGEE
ASELRSMLEVNYPMENGIVRNWEDMTHLYDHTFGPQKMNVDTKNTRILLTEPPMNPMKNR
EKMIELMFEKYQFHSVHIAIQAVLTLYAQGLVTGVVVDSGDGVTHFCPVYDGFALPHLTR
RLDIAGRDITRYLIKLLLLRGYAFNHSADFETVRMMKEKLCYVAYDIELEQKLALDTTVL
VEPYILPDGRVIKVGGERFGAPEALFQPHLINVDSVGVAELLFNTIQAADMDLRADFYKH
IVLSGGSTMYPGLPSRLEREIKQLYLERVLKGNTTSLSKFKIRIEDPPRRKHMVFMGGSV
LADIMKDKDEFWLLRSEYQENGLRVLDKLLRPAAH
>Cuni_T016860-R1  Name:"Similar to Rgs7 Regulator of G-protein signaling 7 (Rattus norvegicus)" Cuni1080:55081-96630(+)
MAHRHSSSRRTDSLPSSVATPLGNGQHTHEDNPNHLVYKKMETIIERMQDESTGVPVRTV
KSFMSKVPSVFTGQDLVSWMMRNLDVEDQ
>Cuni_T016864-R1  Name:"Similar to SLC46A3 Solute carrier family 46 member 3 (Gallus gallus)" Cuni1080:292528-308071(+)
MTPSTAQSQPALCLKIYKLIDVIQIYFVEIALFFFFLSRHMSLPLFQEFVESQIYAQHGV
PFPGFGILKKNTSLSDPAWDKAHHESVLVVLGLQIAEGLPAIVTVVILGAVSDKTGRHKI
LLWLPALGACVHSLIYILILYTQWNIDGLFLAAAFRGLSGSMTAFLAGASYYATNYVKPE
QRLNRLAVQEFLNGGAYATGNIMVGFWVKDAEFLKPFWFTLICGLISLLISLFLVQETKP
DQNHQRLSPIVRRQGEGNCCADTFGPLMKYIRCSASSSLAKIWLAIIVFQAYAFVHIGQI
NTLVLYLSQQKFLFAYDNSVTGDGPWAKIGLFLAVIMAVAALATGVCIPIFQKFISDTNI
IFLGFASKALGTLWIAVVRNETVLYFAILLLAFELFPFPILRAKVARNVNSSEQGTVFAM
MHCGESITYFLAPFMFSMIYASTMSFYSGFVFIVSMLFLAVPVIFLLILRFVEVRSPNGY
QEMNGDSDCSENVVASVPVQAQAQSESMLPSEPISFIQISRETNDV
>Cuni_T016859-R1  Name:"Similar to TMED3 Transmembrane emp24 domain-containing protein 3 (Homo sapiens)" Cuni1080:18558-24260(-)
MLVQTICILFLSVTVCWAYFAREGFTIMIPPKQQSCFSKKFTSKIKVIFEYRVTAGGNQD
IDAKIVMPNGVYLYVEERKHGDEVSFDAQNGEYQFCFSNEFSKMTTKRIAFNIRPFDEGS
LAEEAGEQAPQVKGPLEAFCDNIHFLMTTVMDFQMKYMVRESMSRYVAEHLNKRVMWWSL
GQTVIIVLTGFGQVFIFKKFFTETRRSSKPLEVPTLST
>Cuni_T016861-R1  Name:"Similar to FAM186A Protein FAM186A (Homo sapiens)" Cuni1080:139214-140796(+)
ILGLSMNLNLLIIYGLSMSLNLLNILGLSMNLNLLSILGLSKSLNLLSILGLSMNLNLLS
ILGLSMNLNLLSILGLSVNLNLLSILGLSMSLNLLSILGLSMNLNLLSILGLSMSLNLLS
ILGLSVNLNLLNILGLSMNLNLLNILGLSMNLNLLNILGWSMNLNLLSILGLSINLNLLN
ILGLSMNLNLLSILGLSMSLNLLSILGLSLNLNLLSILGLSMNLNLLNILGLSMNLNLLS
ILSLSMNLNLLNLLGLSMNLNLLIIYGLSMSLNLLNILGFSLNLNFLSILGLSINLNLLS
ILGLSMNLNLLSILGLSMNLNLLSILGLSVNLNLLSILGLSMSLNLLNILGLSVNLNLLS
ILGLSMNLNLLSILGLSMNLNLLSILGLSMNLNLLSILGLSINLNLLNILGLSVNLNLLS
ILGLSMNLNLLSILGLSMNLNLLCILGLSMNLNLLSILGLSMNLNLLSILGLSMNLNLLS
ILGLSMNLNLLSILGLSMNLNLLSILGLSMNLNLLSILGLSMNLNLL
>Cuni_T015880-R1  Name:"Similar to abcb6 ATP-binding cassette sub-family B member 6, mitochondrial (Xenopus tropicalis)" Cuni1081:99078-140894(-)
MEFCENGTSWSDIWVDDGFNRCFYDAVSAIILFGFIFISGFIQCLVFSKYAVPAEQQGKL
RWVSKVQVFLIIILILEALLHMVLSDVVINEQTLYGYQVMQACAVIAACIVAWWLLAMEK
RSMLPSFSTRGQGFVSILFWMIFFVRENVMFVSWSSPAWWWQVKNDSDRAELGLFIVRYI
AVFFLLALSFLRPIQSPYSSLPSTDEEPSNPAEQGKSTWSNSFTKVRMMLPYVWPKTSFI
LQFVVGICLVLLVVGRVINVFVPIYSKNIVNSLTYDPNVENQQLEFKWNYILIYVALLFL
KGGTGTAGFVNNLRSLLWIRVEQYCTRSIQLRLFTHLHNLSLRWHIGKKTGEMLRVVDRG
TASVTTLLSYILFQILPTIADIVIAIIYFVTAFNYLFGIITFLSMAMYLAATVKATEWRT
KYRRQRNVRDNAANARAVDTLLNFETVKYYAATDYEREHYEKAILEYQLSEWKFNAVFNV
LSLFQNIINTVSLIAGSMLCAWAVVHGIGGLKLNVGDYVLFGTYTSQLYGPLNTLGNTYR
MIQQAFIDMENMFELLETEIEVKDVPGAKDLVVKGGAIEFENVSFQYEPNKPILKDVSFS
VPAGHTFALVGHTGSGKSTIVRLLFRFYDVNSGCIKIDGQDIAKVTQKSLRSVIGVVPQD
TVLFNNDIRYNIRYGRLDATDEEVEDAAKAAEIHERILTFPKKYDTVVGERGLRLSGGEK
QRVAIARTLLKAPAIVLLDEATSALDTRTERSIQSSLARVCENRTTIIVAHRLSTIIHAH
QILVLQDGEILESGTHSELLEKGGTYADMWQQQLVKQGEGENDKEEKKEKPQRRNLSFNN
QNIGSGPAGNGSLQSVGRDDVLFQV
>Cuni_T015879-R1  Name:"Similar to unc-29 Acetylcholine receptor subunit beta-type unc-29 (Caenorhabditis elegans)" Cuni1081:45158-83820(+)
YWHDFQLVWNPEDYGGIMMIKISHTHVWVPDVVLFNNADGKFEVSYNPNCVVRFNGDVNF
IPPAIYTSSCTIDVRYFPFDQQECEMKFGSWTFEGKTLVYKFQDSINNIILTDYMKNGAW
DIIDGPGRITTVNDSITGQPKQMIVYVLKLRRKTLFYTVNLIIPCFLHAMVCLCVFVLPA
[truncated: 11,048,863 more chars]
